# Supplementary material for: Modeling the waves of Covid-19
Source: medRxiv preprint, doi:10.1101/2021.06.15.21258969, version 4 (2021-08-11)
Supplement: forecasting program for later stages [file 258969_file02.zip]

Archive with 9 entries (9 files):
- foreurun.exe
- forwor.txt
- forworstat.txt
- mathpath.txt
- README-WORLD.pdf
- README-WORLD.txt
- world-6-7.txt
- world-full.dat
- worldfile.txt
