# Supplementary material for: Modeling the waves of Covid-19
Source: medRxiv preprint, doi:10.1101/2021.06.15.21258969, version 4 (2021-08-11)
Supplement: forecasting program for later stages [file 258969_file02.zip › README-WORLD.txt]

USE THIS PROGRAM, CREATED BY IVAN CHEREDNIK,
AT YOUR OWN RISK. ONE PROJECTIONS IS ON THE 
BASIS OF THE LATEST 20 DAYS. THE AVRG CURVE
IS THE AVERAGE OF 9 PRIOR FORECAST CURVES. 
EXPECT THE  "SATURATION"  TO MOVE OVER TIME. 
IF THERE IS NO SATURATION THEN THE FORECAST
IS FOR THE 4 NEXT MONTHS. THIS PROGRAM IS
DESIGNED FOR THE LATER STAGES OF THE WAVES. 

TO USE IT, YOU MUST AGREE WITH THESE TERMS.
ALL CREDITS GO TO IVAN CHEREDNIK, THE DATA:
 githubusercontent.com/owid/covid-19-data.
THE PROGRAM WAS CHECKED FOR MATHEMATICA 11.

1) PUT THE FILES IN ANY FOLDER. IF YOU USE
MathKern, THEN MAKE IT THE START FOLDER IN
"MathKern Properties". ALTERNATIVELY,  AND 
FOR "FULL" MATHEMATICA, BEGIN WITH COMMAND
SetDirectory["your folder"], NOTICE QUOTES.
THEN DO "<<forwor.txt"; THE OUTPUT WILL BE  
IN "world-full.pdf"  (IF YOU USE MathKern).

2) EXE-TOOL.  CHANGE PATH OF "math.exe" TO 
ITS ACTUAL ONE IN YOUR SYSTEM, WHICH IS IN 
"mathpath.txt" (WITH QUOTES THERE).  CLICK 
ON "foreurun.exe", AND AFTER 2-3 MINS  THE
FILE "world-now.pdf" WILL OPEN. COVID DATA 
ARE UPDATED DAILY; THERE IS NO HARM TO RUN 
"foreurun.exe"  AS MANY TIMES AS YOU WISH.

3) FILE "worldfile.txt" CONTROLS COUNTRIES
AND REGIONS. MAKE reg="ALL"  FOR THE WORLD,
IT CAN BE reg="Europe","North America",ETC.
BY MAKING  grp=1  YOU WILL RUN IT FOR YOUR 
GROUP grpx={"United States","Brazil"}, ETC.
MAKE delprev=1  FOR THE 1st RUN WITH A NEW
GROUP/REGION:  OLD OUTPUTS WILL BE DELETED.

THE PDF FILES PRODUCED BY "forwor.txt" AND
ITS OUTPUT IN  MATHEMATICA CONTAIN FURTHER 
RELEVANT INFORMATION. THIS SOFTWARE IS NOT 
FOR ANY COMMERCIAL USE; THIS IS A RESEARCH
TOOL! YOUR COMMENTS ARE APPRECIATED. -IVAN
