# Supplementary material for: Modeling the waves of Covid-19
Source: medRxiv preprint, doi:10.1101/2021.06.15.21258969, version 4 (2021-08-11)
Supplement: forecasting program for later stages [file 258969_file02.zip › world-6-7.txt]

{{"iso_code", "continent", "location", "date", "total_cases", "new_cases", 
  "new_cases_smoothed", "total_deaths", "new_deaths", "new_deaths_smoothed", 
  "total_cases_per_million", "new_cases_per_million", 
  "new_cases_smoothed_per_million", "total_deaths_per_million", 
  "new_deaths_per_million", "new_deaths_smoothed_per_million", 
  "reproduction_rate", "icu_patients", "icu_patients_per_million", 
  "hosp_patients", "hosp_patients_per_million", "weekly_icu_admissions", 
  "weekly_icu_admissions_per_million", "weekly_hosp_admissions", 
  "weekly_hosp_admissions_per_million", "new_tests", "total_tests", 
  "total_tests_per_thousand", "new_tests_per_thousand", "new_tests_smoothed", 
  "new_tests_smoothed_per_thousand", "positive_rate", "tests_per_case", 
  "tests_units", "total_vaccinations", "people_vaccinated", 
  "people_fully_vaccinated", "new_vaccinations", "new_vaccinations_smoothed", 
  "total_vaccinations_per_hundred", "people_vaccinated_per_hundred", 
  "people_fully_vaccinated_per_hundred", 
  "new_vaccinations_smoothed_per_million", "stringency_index", "population", 
  "population_density", "median_age", "aged_65_older", "aged_70_older", 
  "gdp_per_capita", "extreme_poverty", "cardiovasc_death_rate", 
  "diabetes_prevalence", "female_smokers", "male_smokers", 
  "handwashing_facilities", "hospital_beds_per_thousand", "life_expectancy", 
  "human_development_index"}, {"AFG", "Asia", "Afghanistan", "2020-02-24", 
  1., 1., "", "", "", "", 0.026, 0.026, "", "", "", "", "", "", "", "", "", 
  "", "", "", "", "", "", "", "", "", "", "", "", "", "", "", "", "", "", "", 
  "", "", "", 8.33, 3.8928341*^7, 54.422, 18.6, 2.581, 1.337, 1803.987, "", 
  597.029, 9.59, "", "", 37.746, 0.5, 64.83, 0.511}, 
 {"AFG", "Asia", "Afghanistan", "2020-02-25", 1., 0., "", "", "", "", 0.026, 
  0., "", "", "", "", "", "", "", "", "", "", "", "", "", "", "", "", "", "", 
  "", "", "", "", "", "", "", "", "", "", "", "", "", 8.33, 3.8928341*^7, 
  54.422, 18.6, 2.581, 1.337, 1803.987, "", 597.029, 9.59, "", "", 37.746, 
  0.5, 64.83, 0.511}, {"AFG", "Asia", "Afghanistan", "2020-02-26", 1., 0., 
  "", "", "", "", 0.026, 0., "", "", "", "", "", "", "", "", "", "", "", "", 
  "", "", "", "", "", "", "", "", "", "", "", "", "", "", "", "", "", "", "", 
  8.33, 3.8928341*^7, 54.422, 18.6, 2.581, 1.337, 1803.987, "", 597.029, 
  9.59, "", "", 37.746, 0.5, 64.83, 0.511}, {"AFG", "Asia", "Afghanistan", 
  "2020-02-27", 1., 0., "", "", "", "", 0.026, 0., "", "", "", "", "", "", 
  "", "", "", "", "", "", "", "", "", "", "", "", "", "", "", "", "", "", "", 
  "", "", "", "", "", "", 8.33, 3.8928341*^7, 54.422, 18.6, 2.581, 1.337, 
  1803.987, "", 597.029, 9.59, "", "", 37.746, 0.5, 64.83, 0.511}, 
 {"AFG", "Asia", "Afghanistan", "2020-02-28", 1., 0., "", "", "", "", 0.026, 
  0., "", "", "", "", "", "", "", "", "", "", "", "", "", "", "", "", "", "", 
  "", "", "", "", "", "", "", "", "", "", "", "", "", 8.33, 3.8928341*^7, 
  54.422, 18.6, 2.581, 1.337, 1803.987, "", 597.029, 9.59, "", "", 37.746, 
  0.5, 64.83, 0.511}, {"AFG", "Asia", "Afghanistan", "2020-02-29", 1., 0., 
  0.143, "", "", 0., 0.026, 0., 0.004, "", "", 0., "", "", "", "", "", "", 
  "", "", "", "", "", "", "", "", "", "", "", "", "", "", "", "", "", "", "", 
  "", "", 8.33, 3.8928341*^7, 54.422, 18.6, 2.581, 1.337, 1803.987, "", 
  597.029, 9.59, "", "", 37.746, 0.5, 64.83, 0.511}, 
 {"AFG", "Asia", "Afghanistan", "2020-03-01", 1., 0., 0.143, "", "", 0., 
  0.026, 0., 0.004, "", "", 0., "", "", "", "", "", "", "", "", "", "", "", 
  "", "", "", "", "", "", "", "", "", "", "", "", "", "", "", "", 27.78, 
  3.8928341*^7, 54.422, 18.6, 2.581, 1.337, 1803.987, "", 597.029, 9.59, "", 
  "", 37.746, 0.5, 64.83, 0.511}, {"AFG", "Asia", "Afghanistan", 
  "2020-03-02", 1., 0., 0., "", "", 0., 0.026, 0., 0., "", "", 0., "", "", 
  "", "", "", "", "", "", "", "", "", "", "", "", "", "", "", "", "", "", "", 
  "", "", "", "", "", "", 27.78, 3.8928341*^7, 54.422, 18.6, 2.581, 1.337, 
  1803.987, "", 597.029, 9.59, "", "", 37.746, 0.5, 64.83, 0.511}, 
 {"AFG", "Asia", "Afghanistan", "2020-03-03", 2., 1., 0.143, "", "", 0., 
  0.051, 0.026, 0.004, "", "", 0., "", "", "", "", "", "", "", "", "", "", 
  "", "", "", "", "", "", "", "", "", "", "", "", "", "", "", "", "", 27.78, 
  3.8928341*^7, 54.422, 18.6, 2.581, 1.337, 1803.987, "", 597.029, 9.59, "", 
  "", 37.746, 0.5, 64.83, 0.511}, {"AFG", "Asia", "Afghanistan", 
  "2020-03-04", 4., 2., 0.429, "", "", 0., 0.103, 0.051, 0.011, "", "", 0., 
  "", "", "", "", "", "", "", "", "", "", "", "", "", "", "", "", "", "", "", 
  "", "", "", "", "", "", "", "", 27.78, 3.8928341*^7, 54.422, 18.6, 2.581, 
  1.337, 1803.987, "", 597.029, 9.59, "", "", 37.746, 0.5, 64.83, 0.511}, 
 {"AFG", "Asia", "Afghanistan", "2020-03-05", 4., 0., 0.429, "", "", 0., 
  0.103, 0., 0.011, "", "", 0., "", "", "", "", "", "", "", "", "", "", "", 
  "", "", "", "", "", "", "", "", "", "", "", "", "", "", "", "", 27.78, 
  3.8928341*^7, 54.422, 18.6, 2.581, 1.337, 1803.987, "", 597.029, 9.59, "", 
  "", 37.746, 0.5, 64.83, 0.511}, {"AFG", "Asia", "Afghanistan", 
  "2020-03-06", 4., 0., 0.429, "", "", 0., 0.103, 0., 0.011, "", "", 0., "", 
  "", "", "", "", "", "", "", "", "", "", "", "", "", "", "", "", "", "", "", 
  "", "", "", "", "", "", "", 27.78, 3.8928341*^7, 54.422, 18.6, 2.581, 
  1.337, 1803.987, "", 597.029, 9.59, "", "", 37.746, 0.5, 64.83, 0.511}, 
 {"AFG", "Asia", "Afghanistan", "2020-03-07", 4., 0., 0.429, "", "", 0., 
  0.103, 0., 0.011, "", "", 0., "", "", "", "", "", "", "", "", "", "", "", 
  "", "", "", "", "", "", "", "", "", "", "", "", "", "", "", "", 27.78, 
  3.8928341*^7, 54.422, 18.6, 2.581, 1.337, 1803.987, "", 597.029, 9.59, "", 
  "", 37.746, 0.5, 64.83, 0.511}, {"AFG", "Asia", "Afghanistan", 
  "2020-03-08", 5., 1., 0.571, "", "", 0., 0.128, 0.026, 0.015, "", "", 0., 
  "", "", "", "", "", "", "", "", "", "", "", "", "", "", "", "", "", "", "", 
  "", "", "", "", "", "", "", "", 27.78, 3.8928341*^7, 54.422, 18.6, 2.581, 
  1.337, 1803.987, "", 597.029, 9.59, "", "", 37.746, 0.5, 64.83, 0.511}, 
 {"AFG", "Asia", "Afghanistan", "2020-03-09", 7., 2., 0.857, "", "", 0., 
  0.18, 0.051, 0.022, "", "", 0., "", "", "", "", "", "", "", "", "", "", "", 
  "", "", "", "", "", "", "", "", "", "", "", "", "", "", "", "", 27.78, 
  3.8928341*^7, 54.422, 18.6, 2.581, 1.337, 1803.987, "", 597.029, 9.59, "", 
  "", 37.746, 0.5, 64.83, 0.511}, {"AFG", "Asia", "Afghanistan", 
  "2020-03-10", 8., 1., 0.857, "", "", 0., 0.206, 0.026, 0.022, "", "", 0., 
  "", "", "", "", "", "", "", "", "", "", "", "", "", "", "", "", "", "", "", 
  "", "", "", "", "", "", "", "", 27.78, 3.8928341*^7, 54.422, 18.6, 2.581, 
  1.337, 1803.987, "", 597.029, 9.59, "", "", 37.746, 0.5, 64.83, 0.511}, 
 {"AFG", "Asia", "Afghanistan", "2020-03-11", 11., 3., 1., "", "", 0., 0.283, 
  0.077, 0.026, "", "", 0., "", "", "", "", "", "", "", "", "", "", "", "", 
  "", "", "", "", "", "", "", "", "", "", "", "", "", "", "", 27.78, 
  3.8928341*^7, 54.422, 18.6, 2.581, 1.337, 1803.987, "", 597.029, 9.59, "", 
  "", 37.746, 0.5, 64.83, 0.511}, {"AFG", "Asia", "Afghanistan", 
  "2020-03-12", 12., 1., 1.143, "", "", 0., 0.308, 0.026, 0.029, "", "", 0., 
  "", "", "", "", "", "", "", "", "", "", "", "", "", "", "", "", "", "", "", 
  "", "", "", "", "", "", "", "", 27.78, 3.8928341*^7, 54.422, 18.6, 2.581, 
  1.337, 1803.987, "", 597.029, 9.59, "", "", 37.746, 0.5, 64.83, 0.511}, 
 {"AFG", "Asia", "Afghanistan", "2020-03-13", 13., 1., 1.286, "", "", 0., 
  0.334, 0.026, 0.033, "", "", 0., "", "", "", "", "", "", "", "", "", "", 
  "", "", "", "", "", "", "", "", "", "", "", "", "", "", "", "", "", 27.78, 
  3.8928341*^7, 54.422, 18.6, 2.581, 1.337, 1803.987, "", 597.029, 9.59, "", 
  "", 37.746, 0.5, 64.83, 0.511}, {"AFG", "Asia", "Afghanistan", 
  "2020-03-14", 15., 2., 1.571, "", "", 0., 0.385, 0.051, 0.04, "", "", 0., 
  "", "", "", "", "", "", "", "", "", "", "", "", "", "", "", "", "", "", "", 
  "", "", "", "", "", "", "", "", 38.89, 3.8928341*^7, 54.422, 18.6, 2.581, 
  1.337, 1803.987, "", 597.029, 9.59, "", "", 37.746, 0.5, 64.83, 0.511}, 
 {"AFG", "Asia", "Afghanistan", "2020-03-15", 16., 1., 1.571, "", "", 0., 
  0.411, 0.026, 0.04, "", "", 0., "", "", "", "", "", "", "", "", "", "", "", 
  "", "", "", "", "", "", "", "", "", "", "", "", "", "", "", "", 38.89, 
  3.8928341*^7, 54.422, 18.6, 2.581, 1.337, 1803.987, "", 597.029, 9.59, "", 
  "", 37.746, 0.5, 64.83, 0.511}, {"AFG", "Asia", "Afghanistan", 
  "2020-03-16", 18., 2., 1.571, "", "", 0., 0.462, 0.051, 0.04, "", "", 0., 
  "", "", "", "", "", "", "", "", "", "", "", "", "", "", "", "", "", "", "", 
  "", "", "", "", "", "", "", "", 38.89, 3.8928341*^7, 54.422, 18.6, 2.581, 
  1.337, 1803.987, "", 597.029, 9.59, "", "", 37.746, 0.5, 64.83, 0.511}, 
 {"AFG", "Asia", "Afghanistan", "2020-03-17", 20., 2., 1.714, "", "", 0., 
  0.514, 0.051, 0.044, "", "", 0., "", "", "", "", "", "", "", "", "", "", 
  "", "", "", "", "", "", "", "", "", "", "", "", "", "", "", "", "", 38.89, 
  3.8928341*^7, 54.422, 18.6, 2.581, 1.337, 1803.987, "", 597.029, 9.59, "", 
  "", 37.746, 0.5, 64.83, 0.511}, {"AFG", "Asia", "Afghanistan", 
  "2020-03-18", 24., 4., 1.857, "", "", 0., 0.617, 0.103, 0.048, "", "", 0., 
  "", "", "", "", "", "", "", "", "", "", "", "", "", "", "", "", "", "", "", 
  "", "", "", "", "", "", "", "", 41.67, 3.8928341*^7, 54.422, 18.6, 2.581, 
  1.337, 1803.987, "", 597.029, 9.59, "", "", 37.746, 0.5, 64.83, 0.511}, 
 {"AFG", "Asia", "Afghanistan", "2020-03-19", 25., 1., 1.857, "", "", 0., 
  0.642, 0.026, 0.048, "", "", 0., "", "", "", "", "", "", "", "", "", "", 
  "", "", "", "", "", "", "", "", "", "", "", "", "", "", "", "", "", 41.67, 
  3.8928341*^7, 54.422, 18.6, 2.581, 1.337, 1803.987, "", 597.029, 9.59, "", 
  "", 37.746, 0.5, 64.83, 0.511}, {"AFG", "Asia", "Afghanistan", 
  "2020-03-20", 29., 4., 2.286, "", "", 0., 0.745, 0.103, 0.059, "", "", 0., 
  "", "", "", "", "", "", "", "", "", "", "", "", "", "", "", "", "", "", "", 
  "", "", "", "", "", "", "", "", 41.67, 3.8928341*^7, 54.422, 18.6, 2.581, 
  1.337, 1803.987, "", 597.029, 9.59, "", "", 37.746, 0.5, 64.83, 0.511}, 
 {"AFG", "Asia", "Afghanistan", "2020-03-21", 30., 1., 2.143, "", "", 0., 
  0.771, 0.026, 0.055, "", "", 0., "", "", "", "", "", "", "", "", "", "", 
  "", "", "", "", "", "", "", "", "", "", "", "", "", "", "", "", "", 41.67, 
  3.8928341*^7, 54.422, 18.6, 2.581, 1.337, 1803.987, "", 597.029, 9.59, "", 
  "", 37.746, 0.5, 64.83, 0.511}, {"AFG", "Asia", "Afghanistan", 
  "2020-03-22", 34., 4., 2.571, 1., 1., 0.143, 0.873, 0.103, 0.066, 0.026, 
  0.026, 0.004, "", "", "", "", "", "", "", "", "", "", "", "", "", "", "", 
  "", "", "", "", "", "", "", "", "", "", "", "", 41.67, 3.8928341*^7, 
  54.422, 18.6, 2.581, 1.337, 1803.987, "", 597.029, 9.59, "", "", 37.746, 
  0.5, 64.83, 0.511}, {"AFG", "Asia", "Afghanistan", "2020-03-23", 41., 7., 
  3.286, 1., 0., 0.143, 1.053, 0.18, 0.084, 0.026, 0., 0.004, "", "", "", "", 
  "", "", "", "", "", "", "", "", "", "", "", "", "", "", "", "", "", "", "", 
  "", "", "", "", 41.67, 3.8928341*^7, 54.422, 18.6, 2.581, 1.337, 1803.987, 
  "", 597.029, 9.59, "", "", 37.746, 0.5, 64.83, 0.511}, 
 {"AFG", "Asia", "Afghanistan", "2020-03-24", 43., 2., 3.286, 1., 0., 0.143, 
  1.105, 0.051, 0.084, 0.026, 0., 0.004, "", "", "", "", "", "", "", "", "", 
  "", "", "", "", "", "", "", "", "", "", "", "", "", "", "", "", "", "", 
  50.93, 3.8928341*^7, 54.422, 18.6, 2.581, 1.337, 1803.987, "", 597.029, 
  9.59, "", "", 37.746, 0.5, 64.83, 0.511}, {"AFG", "Asia", "Afghanistan", 
  "2020-03-25", 76., 33., 7.429, 2., 1., 0.286, 1.952, 0.848, 0.191, 0.051, 
  0.026, 0.007, "", "", "", "", "", "", "", "", "", "", "", "", "", "", "", 
  "", "", "", "", "", "", "", "", "", "", "", "", 59.26, 3.8928341*^7, 
  54.422, 18.6, 2.581, 1.337, 1803.987, "", 597.029, 9.59, "", "", 37.746, 
  0.5, 64.83, 0.511}, {"AFG", "Asia", "Afghanistan", "2020-03-26", 80., 4., 
  7.857, 3., 1., 0.429, 2.055, 0.103, 0.202, 0.077, 0.026, 0.011, "", "", "", 
  "", "", "", "", "", "", "", "", "", "", "", "", "", "", "", "", "", "", "", 
  "", "", "", "", "", 59.26, 3.8928341*^7, 54.422, 18.6, 2.581, 1.337, 
  1803.987, "", 597.029, 9.59, "", "", 37.746, 0.5, 64.83, 0.511}, 
 {"AFG", "Asia", "Afghanistan", "2020-03-27", 91., 11., 8.857, 3., 0., 0.429, 
  2.338, 0.283, 0.228, 0.077, 0., 0.011, "", "", "", "", "", "", "", "", "", 
  "", "", "", "", "", "", "", "", "", "", "", "", "", "", "", "", "", "", 
  59.26, 3.8928341*^7, 54.422, 18.6, 2.581, 1.337, 1803.987, "", 597.029, 
  9.59, "", "", 37.746, 0.5, 64.83, 0.511}, {"AFG", "Asia", "Afghanistan", 
  "2020-03-28", 107., 16., 11., 4., 1., 0.571, 2.749, 0.411, 0.283, 0.103, 
  0.026, 0.015, "", "", "", "", "", "", "", "", "", "", "", "", "", "", "", 
  "", "", "", "", "", "", "", "", "", "", "", "", 67.59, 3.8928341*^7, 
  54.422, 18.6, 2.581, 1.337, 1803.987, "", 597.029, 9.59, "", "", 37.746, 
  0.5, 64.83, 0.511}, {"AFG", "Asia", "Afghanistan", "2020-03-29", 118., 11., 
  12., 4., 0., 0.429, 3.031, 0.283, 0.308, 0.103, 0., 0.011, 1.47, "", "", 
  "", "", "", "", "", "", "", "", "", "", "", "", "", "", "", "", "", "", "", 
  "", "", "", "", "", 67.59, 3.8928341*^7, 54.422, 18.6, 2.581, 1.337, 
  1803.987, "", 597.029, 9.59, "", "", 37.746, 0.5, 64.83, 0.511}, 
 {"AFG", "Asia", "Afghanistan", "2020-03-30", 146., 28., 15., 4., 0., 0.429, 
  3.75, 0.719, 0.385, 0.103, 0., 0.011, 1.47, "", "", "", "", "", "", "", "", 
  "", "", "", "", "", "", "", "", "", "", "", "", "", "", "", "", "", "", 
  67.59, 3.8928341*^7, 54.422, 18.6, 2.581, 1.337, 1803.987, "", 597.029, 
  9.59, "", "", 37.746, 0.5, 64.83, 0.511}, {"AFG", "Asia", "Afghanistan", 
  "2020-03-31", 175., 29., 18.857, 4., 0., 0.429, 4.495, 0.745, 0.484, 0.103, 
  0., 0.011, 1.47, "", "", "", "", "", "", "", "", "", "", "", "", "", "", 
  "", "", "", "", "", "", "", "", "", "", "", "", 67.59, 3.8928341*^7, 
  54.422, 18.6, 2.581, 1.337, 1803.987, "", 597.029, 9.59, "", "", 37.746, 
  0.5, 64.83, 0.511}, {"AFG", "Asia", "Afghanistan", "2020-04-01", 197., 22., 
  17.286, 4., 0., 0.286, 5.061, 0.565, 0.444, 0.103, 0., 0.007, 1.47, "", "", 
  "", "", "", "", "", "", "", "", "", "", "", "", "", "", "", "", "", "", "", 
  "", "", "", "", "", 67.59, 3.8928341*^7, 54.422, 18.6, 2.581, 1.337, 
  1803.987, "", 597.029, 9.59, "", "", 37.746, 0.5, 64.83, 0.511}, 
 {"AFG", "Asia", "Afghanistan", "2020-04-02", 240., 43., 22.857, 4., 0., 
  0.143, 6.165, 1.105, 0.587, 0.103, 0., 0.004, 1.47, "", "", "", "", "", "", 
  "", "", "", "", "", "", "", "", "", "", "", "", "", "", "", "", "", "", "", 
  "", 67.59, 3.8928341*^7, 54.422, 18.6, 2.581, 1.337, 1803.987, "", 597.029, 
  9.59, "", "", 37.746, 0.5, 64.83, 0.511}, {"AFG", "Asia", "Afghanistan", 
  "2020-04-03", 275., 35., 26.286, 8., 4., 0.714, 7.064, 0.899, 0.675, 0.206, 
  0.103, 0.018, 1.46, "", "", "", "", "", "", "", "", "", "", "", "", "", "", 
  "", "", "", "", "", "", "", "", "", "", "", "", 67.59, 3.8928341*^7, 
  54.422, 18.6, 2.581, 1.337, 1803.987, "", 597.029, 9.59, "", "", 37.746, 
  0.5, 64.83, 0.511}, {"AFG", "Asia", "Afghanistan", "2020-04-04", 300., 25., 
  27.571, 10., 2., 0.857, 7.706, 0.642, 0.708, 0.257, 0.051, 0.022, 1.45, "", 
  "", "", "", "", "", "", "", "", "", "", "", "", "", "", "", "", "", "", "", 
  "", "", "", "", "", "", 67.59, 3.8928341*^7, 54.422, 18.6, 2.581, 1.337, 
  1803.987, "", 597.029, 9.59, "", "", 37.746, 0.5, 64.83, 0.511}, 
 {"AFG", "Asia", "Afghanistan", "2020-04-05", 338., 38., 31.429, 12., 2., 
  1.143, 8.683, 0.976, 0.807, 0.308, 0.051, 0.029, 1.44, "", "", "", "", "", 
  "", "", "", "", "", "", "", "", "", "", "", "", "", "", "", "", "", "", "", 
  "", "", 78.7, 3.8928341*^7, 54.422, 18.6, 2.581, 1.337, 1803.987, "", 
  597.029, 9.59, "", "", 37.746, 0.5, 64.83, 0.511}, 
 {"AFG", "Asia", "Afghanistan", "2020-04-06", 368., 30., 31.714, 15., 3., 
  1.571, 9.453, 0.771, 0.815, 0.385, 0.077, 0.04, 1.42, "", "", "", "", "", 
  "", "", "", "", "", "", "", "", "", "", "", "", "", "", "", "", "", "", "", 
  "", "", 78.7, 3.8928341*^7, 54.422, 18.6, 2.581, 1.337, 1803.987, "", 
  597.029, 9.59, "", "", 37.746, 0.5, 64.83, 0.511}, 
 {"AFG", "Asia", "Afghanistan", "2020-04-07", 424., 56., 35.571, 16., 1., 
  1.714, 10.892, 1.439, 0.914, 0.411, 0.026, 0.044, 1.41, "", "", "", "", "", 
  "", "", "", "", "", "", "", "", "", "", "", "", "", "", "", "", "", "", "", 
  "", "", 78.7, 3.8928341*^7, 54.422, 18.6, 2.581, 1.337, 1803.987, "", 
  597.029, 9.59, "", "", 37.746, 0.5, 64.83, 0.511}, 
 {"AFG", "Asia", "Afghanistan", "2020-04-08", 445., 21., 35.429, 16., 0., 
  1.714, 11.431, 0.539, 0.91, 0.411, 0., 0.044, 1.39, "", "", "", "", "", "", 
  "", "", "", "", "", "", "", "", "", "", "", "", "", "", "", "", "", "", "", 
  "", 78.7, 3.8928341*^7, 54.422, 18.6, 2.581, 1.337, 1803.987, "", 597.029, 
  9.59, "", "", 37.746, 0.5, 64.83, 0.511}, {"AFG", "Asia", "Afghanistan", 
  "2020-04-09", 485., 40., 35., 17., 1., 1.857, 12.459, 1.028, 0.899, 0.437, 
  0.026, 0.048, 1.39, "", "", "", "", "", "", "", "", "", "", "", "", "", "", 
  "", "", "", "", "", "", "", "", "", "", "", "", 78.7, 3.8928341*^7, 54.422, 
  18.6, 2.581, 1.337, 1803.987, "", 597.029, 9.59, "", "", 37.746, 0.5, 
  64.83, 0.511}, {"AFG", "Asia", "Afghanistan", "2020-04-10", 532., 47., 
  36.714, 18., 1., 1.429, 13.666, 1.207, 0.943, 0.462, 0.026, 0.037, 1.39, 
  "", "", "", "", "", "", "", "", "", "", "", "", "", "", "", "", "", "", "", 
  "", "", "", "", "", "", "", 78.7, 3.8928341*^7, 54.422, 18.6, 2.581, 1.337, 
  1803.987, "", 597.029, 9.59, "", "", 37.746, 0.5, 64.83, 0.511}, 
 {"AFG", "Asia", "Afghanistan", "2020-04-11", 556., 24., 36.571, 18., 0., 
  1.143, 14.283, 0.617, 0.939, 0.462, 0., 0.029, 1.39, "", "", "", "", "", 
  "", "", "", "", "", "", "", "", "", "", "", "", "", "", "", "", "", "", "", 
  "", "", 78.7, 3.8928341*^7, 54.422, 18.6, 2.581, 1.337, 1803.987, "", 
  597.029, 9.59, "", "", 37.746, 0.5, 64.83, 0.511}, 
 {"AFG", "Asia", "Afghanistan", "2020-04-12", 608., 52., 38.571, 19., 1., 1., 
  15.618, 1.336, 0.991, 0.488, 0.026, 0.026, 1.39, "", "", "", "", "", "", 
  "", "", "", "", "", "", "", "", "", "", "", "", "", "", "", "", "", "", "", 
  "", 84.26, 3.8928341*^7, 54.422, 18.6, 2.581, 1.337, 1803.987, "", 597.029, 
  9.59, "", "", 37.746, 0.5, 64.83, 0.511}, {"AFG", "Asia", "Afghanistan", 
  "2020-04-13", 666., 58., 42.571, 22., 3., 1., 17.108, 1.49, 1.094, 0.565, 
  0.077, 0.026, 1.39, "", "", "", "", "", "", "", "", "", "", "", "", "", "", 
  "", "", "", "", "", "", "", "", "", "", "", "", 84.26, 3.8928341*^7, 
  54.422, 18.6, 2.581, 1.337, 1803.987, "", 597.029, 9.59, "", "", 37.746, 
  0.5, 64.83, 0.511}, {"AFG", "Asia", "Afghanistan", "2020-04-14", 715., 49., 
  41.571, 23., 1., 1., 18.367, 1.259, 1.068, 0.591, 0.026, 0.026, 1.39, "", 
  "", "", "", "", "", "", "", "", "", "", "", "", "", "", "", "", "", "", "", 
  "", "", "", "", "", "", 84.26, 3.8928341*^7, 54.422, 18.6, 2.581, 1.337, 
  1803.987, "", 597.029, 9.59, "", "", 37.746, 0.5, 64.83, 0.511}, 
 {"AFG", "Asia", "Afghanistan", "2020-04-15", 785., 70., 48.571, 29., 6., 
  1.857, 20.165, 1.798, 1.248, 0.745, 0.154, 0.048, 1.39, "", "", "", "", "", 
  "", "", "", "", "", "", "", "", "", "", "", "", "", "", "", "", "", "", "", 
  "", "", 84.26, 3.8928341*^7, 54.422, 18.6, 2.581, 1.337, 1803.987, "", 
  597.029, 9.59, "", "", 37.746, 0.5, 64.83, 0.511}, 
 {"AFG", "Asia", "Afghanistan", "2020-04-16", 841., 56., 50.857, 30., 1., 
  1.857, 21.604, 1.439, 1.306, 0.771, 0.026, 0.048, 1.38, "", "", "", "", "", 
  "", "", "", "", "", "", "", "", "", "", "", "", "", "", "", "", "", "", "", 
  "", "", 84.26, 3.8928341*^7, 54.422, 18.6, 2.581, 1.337, 1803.987, "", 
  597.029, 9.59, "", "", 37.746, 0.5, 64.83, 0.511}, 
 {"AFG", "Asia", "Afghanistan", "2020-04-17", 907., 66., 53.571, 30., 0., 
  1.714, 23.299, 1.695, 1.376, 0.771, 0., 0.044, 1.37, "", "", "", "", "", 
  "", "", "", "", "", "", "", "", "", "", "", "", "", "", "", "", "", "", "", 
  "", "", 84.26, 3.8928341*^7, 54.422, 18.6, 2.581, 1.337, 1803.987, "", 
  597.029, 9.59, "", "", 37.746, 0.5, 64.83, 0.511}, 
 {"AFG", "Asia", "Afghanistan", "2020-04-18", 934., 27., 54., 30., 0., 1.714, 
  23.993, 0.694, 1.387, 0.771, 0., 0.044, 1.37, "", "", "", "", "", "", "", 
  "", "", "", "", "", "", "", "", "", "", "", "", "", "", "", "", "", "", "", 
  84.26, 3.8928341*^7, 54.422, 18.6, 2.581, 1.337, 1803.987, "", 597.029, 
  9.59, "", "", 37.746, 0.5, 64.83, 0.511}, {"AFG", "Asia", "Afghanistan", 
  "2020-04-19", 997., 63., 55.571, 33., 3., 2., 25.611, 1.618, 1.428, 0.848, 
  0.077, 0.051, 1.37, "", "", "", "", "", "", "", "", "", "", "", "", "", "", 
  "", "", "", "", "", "", "", "", "", "", "", "", 84.26, 3.8928341*^7, 
  54.422, 18.6, 2.581, 1.337, 1803.987, "", 597.029, 9.59, "", "", 37.746, 
  0.5, 64.83, 0.511}, {"AFG", "Asia", "Afghanistan", "2020-04-20", 1027., 
  30., 51.571, 36., 3., 2., 26.382, 0.771, 1.325, 0.925, 0.077, 0.051, 1.38, 
  "", "", "", "", "", "", "", "", "", "", "", "", "", "", "", "", "", "", "", 
  "", "", "", "", "", "", "", 84.26, 3.8928341*^7, 54.422, 18.6, 2.581, 
  1.337, 1803.987, "", 597.029, 9.59, "", "", 37.746, 0.5, 64.83, 0.511}, 
 {"AFG", "Asia", "Afghanistan", "2020-04-21", 1093., 66., 54., 36., 0., 
  1.857, 28.077, 1.695, 1.387, 0.925, 0., 0.048, 1.41, "", "", "", "", "", 
  "", "", "", "", "", "", "", "", "", "", "", "", "", "", "", "", "", "", "", 
  "", "", 84.26, 3.8928341*^7, 54.422, 18.6, 2.581, 1.337, 1803.987, "", 
  597.029, 9.59, "", "", 37.746, 0.5, 64.83, 0.511}, 
 {"AFG", "Asia", "Afghanistan", "2020-04-22", 1177., 84., 56., 40., 4., 
  1.571, 30.235, 2.158, 1.439, 1.028, 0.103, 0.04, 1.44, "", "", "", "", "", 
  "", "", "", "", "", "", "", "", "", "", "", "", "", "", "", "", "", "", "", 
  "", "", 84.26, 3.8928341*^7, 54.422, 18.6, 2.581, 1.337, 1803.987, "", 
  597.029, 9.59, "", "", 37.746, 0.5, 64.83, 0.511}, 
 {"AFG", "Asia", "Afghanistan", "2020-04-23", 1236., 59., 56.429, 40., 0., 
  1.429, 31.751, 1.516, 1.45, 1.028, 0., 0.037, 1.46, "", "", "", "", "", "", 
  "", "", "", "", "", "", "", "", "", "", "", "", "", "", "", "", "", "", "", 
  "", 84.26, 3.8928341*^7, 54.422, 18.6, 2.581, 1.337, 1803.987, "", 597.029, 
  9.59, "", "", 37.746, 0.5, 64.83, 0.511}, {"AFG", "Asia", "Afghanistan", 
  "2020-04-24", 1331., 95., 60.571, 43., 3., 1.857, 34.191, 2.44, 1.556, 
  1.105, 0.077, 0.048, 1.49, "", "", "", "", "", "", "", "", "", "", "", "", 
  "", "", "", "", "", "", "", "", "", "", "", "", "", "", 84.26, 
  3.8928341*^7, 54.422, 18.6, 2.581, 1.337, 1803.987, "", 597.029, 9.59, "", 
  "", 37.746, 0.5, 64.83, 0.511}, {"AFG", "Asia", "Afghanistan", 
  "2020-04-25", 1464., 133., 75.714, 47., 4., 2.429, 37.608, 3.417, 1.945, 
  1.207, 0.103, 0.062, 1.51, "", "", "", "", "", "", "", "", "", "", "", "", 
  "", "", "", "", "", "", "", "", "", "", "", "", "", "", 84.26, 
  3.8928341*^7, 54.422, 18.6, 2.581, 1.337, 1803.987, "", 597.029, 9.59, "", 
  "", 37.746, 0.5, 64.83, 0.511}, {"AFG", "Asia", "Afghanistan", 
  "2020-04-26", 1532., 68., 76.429, 52., 5., 2.714, 39.354, 1.747, 1.963, 
  1.336, 0.128, 0.07, 1.52, "", "", "", "", "", "", "", "", "", "", "", "", 
  "", "", "", "", "", "", "", "", "", "", "", "", "", "", 84.26, 
  3.8928341*^7, 54.422, 18.6, 2.581, 1.337, 1803.987, "", 597.029, 9.59, "", 
  "", 37.746, 0.5, 64.83, 0.511}, {"AFG", "Asia", "Afghanistan", 
  "2020-04-27", 1704., 172., 96.714, 58., 6., 3.143, 43.773, 4.418, 2.484, 
  1.49, 0.154, 0.081, 1.53, "", "", "", "", "", "", "", "", "", "", "", "", 
  "", "", "", "", "", "", "", "", "", "", "", "", "", "", 84.26, 
  3.8928341*^7, 54.422, 18.6, 2.581, 1.337, 1803.987, "", 597.029, 9.59, "", 
  "", 37.746, 0.5, 64.83, 0.511}, {"AFG", "Asia", "Afghanistan", 
  "2020-04-28", 1830., 126., 105.286, 59., 1., 3.286, 47.009, 3.237, 2.705, 
  1.516, 0.026, 0.084, 1.53, "", "", "", "", "", "", "", "", "", "", "", "", 
  "", "", "", "", "", "", "", "", "", "", "", "", "", "", 84.26, 
  3.8928341*^7, 54.422, 18.6, 2.581, 1.337, 1803.987, "", 597.029, 9.59, "", 
  "", 37.746, 0.5, 64.83, 0.511}, {"AFG", "Asia", "Afghanistan", 
  "2020-04-29", 1940., 110., 109., 61., 2., 3., 49.835, 2.826, 2.8, 1.567, 
  0.051, 0.077, 1.53, "", "", "", "", "", "", "", "", "", "", "", "", "", "", 
  "", "", "", "", "", "", "", "", "", "", "", "", 84.26, 3.8928341*^7, 
  54.422, 18.6, 2.581, 1.337, 1803.987, "", 597.029, 9.59, "", "", 37.746, 
  0.5, 64.83, 0.511}, {"AFG", "Asia", "Afghanistan", "2020-04-30", 2127., 
  187., 127.286, 64., 3., 3.429, 54.639, 4.804, 3.27, 1.644, 0.077, 0.088, 
  1.53, "", "", "", "", "", "", "", "", "", "", "", "", "", "", "", "", "", 
  "", "", "", "", "", "", "", "", "", 84.26, 3.8928341*^7, 54.422, 18.6, 
  2.581, 1.337, 1803.987, "", 597.029, 9.59, "", "", 37.746, 0.5, 64.83, 
  0.511}, {"AFG", "Asia", "Afghanistan", "2020-05-01", 2291., 164., 137.143, 
  68., 4., 3.571, 58.852, 4.213, 3.523, 1.747, 0.103, 0.092, 1.53, "", "", 
  "", "", "", "", "", "", "", "", "", "", "", "", "", "", "", "", "", "", "", 
  "", "", "", "", "", 84.26, 3.8928341*^7, 54.422, 18.6, 2.581, 1.337, 
  1803.987, "", 597.029, 9.59, "", "", 37.746, 0.5, 64.83, 0.511}, 
 {"AFG", "Asia", "Afghanistan", "2020-05-02", 2470., 179., 143.714, 72., 4., 
  3.571, 63.45, 4.598, 3.692, 1.85, 0.103, 0.092, 1.53, "", "", "", "", "", 
  "", "", "", "", "", "", "", "", "", "", "", "", "", "", "", "", "", "", "", 
  "", "", 84.26, 3.8928341*^7, 54.422, 18.6, 2.581, 1.337, 1803.987, "", 
  597.029, 9.59, "", "", 37.746, 0.5, 64.83, 0.511}, 
 {"AFG", "Asia", "Afghanistan", "2020-05-03", 2705., 235., 167.571, 85., 13., 
  4.714, 69.487, 6.037, 4.305, 2.183, 0.334, 0.121, 1.52, "", "", "", "", "", 
  "", "", "", "", "", "", "", "", "", "", "", "", "", "", "", "", "", "", "", 
  "", "", 84.26, 3.8928341*^7, 54.422, 18.6, 2.581, 1.337, 1803.987, "", 
  597.029, 9.59, "", "", 37.746, 0.5, 64.83, 0.511}, 
 {"AFG", "Asia", "Afghanistan", "2020-05-04", 2895., 190., 170.143, 90., 5., 
  4.571, 74.367, 4.881, 4.371, 2.312, 0.128, 0.117, 1.5, "", "", "", "", "", 
  "", "", "", "", "", "", "", "", "", "", "", "", "", "", "", "", "", "", "", 
  "", "", 84.26, 3.8928341*^7, 54.422, 18.6, 2.581, 1.337, 1803.987, "", 
  597.029, 9.59, "", "", 37.746, 0.5, 64.83, 0.511}, 
 {"AFG", "Asia", "Afghanistan", "2020-05-05", 3225., 330., 199.286, 95., 5., 
  5.143, 82.845, 8.477, 5.119, 2.44, 0.128, 0.132, 1.49, "", "", "", "", "", 
  "", "", "", "", "", "", "", "", "", "", "", "", "", "", "", "", "", "", "", 
  "", "", 84.26, 3.8928341*^7, 54.422, 18.6, 2.581, 1.337, 1803.987, "", 
  597.029, 9.59, "", "", 37.746, 0.5, 64.83, 0.511}, 
 {"AFG", "Asia", "Afghanistan", "2020-05-06", 3393., 168., 207.571, 104., 9., 
  6.143, 87.16, 4.316, 5.332, 2.672, 0.231, 0.158, 1.47, "", "", "", "", "", 
  "", "", "", "", "", "", "", "", "", "", "", "", "", "", "", "", "", "", "", 
  "", "", 84.26, 3.8928341*^7, 54.422, 18.6, 2.581, 1.337, 1803.987, "", 
  597.029, 9.59, "", "", 37.746, 0.5, 64.83, 0.511}, 
 {"AFG", "Asia", "Afghanistan", "2020-05-07", 3564., 171., 205.286, 106., 2., 
  6., 91.553, 4.393, 5.273, 2.723, 0.051, 0.154, 1.45, "", "", "", "", "", 
  "", "", "", "", "", "", "", "", "", "", "", "", "", "", "", "", "", "", "", 
  "", "", 84.26, 3.8928341*^7, 54.422, 18.6, 2.581, 1.337, 1803.987, "", 
  597.029, 9.59, "", "", 37.746, 0.5, 64.83, 0.511}, 
 {"AFG", "Asia", "Afghanistan", "2020-05-08", 3781., 217., 212.857, 109., 3., 
  5.857, 97.127, 5.574, 5.468, 2.8, 0.077, 0.15, 1.44, "", "", "", "", "", 
  "", "", "", "", "", "", "", "", "", "", "", "", "", "", "", "", "", "", "", 
  "", "", 84.26, 3.8928341*^7, 54.422, 18.6, 2.581, 1.337, 1803.987, "", 
  597.029, 9.59, "", "", 37.746, 0.5, 64.83, 0.511}, 
 {"AFG", "Asia", "Afghanistan", "2020-05-09", 4042., 261., 224.571, 115., 6., 
  6.143, 103.832, 6.705, 5.769, 2.954, 0.154, 0.158, 1.44, "", "", "", "", 
  "", "", "", "", "", "", "", "", "", "", "", "", "", "", "", "", "", "", "", 
  "", "", "", 84.26, 3.8928341*^7, 54.422, 18.6, 2.581, 1.337, 1803.987, "", 
  597.029, 9.59, "", "", 37.746, 0.5, 64.83, 0.511}, 
 {"AFG", "Asia", "Afghanistan", "2020-05-10", 4403., 361., 242.571, 120., 5., 
  5., 113.105, 9.273, 6.231, 3.083, 0.128, 0.128, 1.44, "", "", "", "", "", 
  "", "", "", "", "", "", "", "", "", "", "", "", "", "", "", "", "", "", "", 
  "", "", 84.26, 3.8928341*^7, 54.422, 18.6, 2.581, 1.337, 1803.987, "", 
  597.029, 9.59, "", "", 37.746, 0.5, 64.83, 0.511}, 
 {"AFG", "Asia", "Afghanistan", "2020-05-11", 4687., 284., 256., 122., 2., 
  4.571, 120.401, 7.295, 6.576, 3.134, 0.051, 0.117, 1.43, "", "", "", "", 
  "", "", "", "", "", "", "", "", "", "", "", "", "", "", "", "", "", "", "", 
  "", "", "", 84.26, 3.8928341*^7, 54.422, 18.6, 2.581, 1.337, 1803.987, "", 
  597.029, 9.59, "", "", 37.746, 0.5, 64.83, 0.511}, 
 {"AFG", "Asia", "Afghanistan", "2020-05-12", 4968., 281., 249., 127., 5., 
  4.571, 127.619, 7.218, 6.396, 3.262, 0.128, 0.117, 1.41, "", "", "", "", 
  "", "", "", "", "", "", "", "", "", "", "", "", "", "", "", "", "", "", "", 
  "", "", "", 84.26, 3.8928341*^7, 54.422, 18.6, 2.581, 1.337, 1803.987, "", 
  597.029, 9.59, "", "", 37.746, 0.5, 64.83, 0.511}, 
 {"AFG", "Asia", "Afghanistan", "2020-05-13", 5227., 259., 262., 132., 5., 
  4., 134.272, 6.653, 6.73, 3.391, 0.128, 0.103, 1.41, "", "", "", "", "", 
  "", "", "", "", "", "", "", "", "", "", "", "", "", "", "", "", "", "", "", 
  "", "", 84.26, 3.8928341*^7, 54.422, 18.6, 2.581, 1.337, 1803.987, "", 
  597.029, 9.59, "", "", 37.746, 0.5, 64.83, 0.511}, 
 {"AFG", "Asia", "Afghanistan", "2020-05-14", 5640., 413., 296.571, 136., 4., 
  4.286, 144.882, 10.609, 7.618, 3.494, 0.103, 0.11, 1.41, "", "", "", "", 
  "", "", "", "", "", "", "", "", "", "", "", "", "", "", "", "", "", "", "", 
  "", "", "", 84.26, 3.8928341*^7, 54.422, 18.6, 2.581, 1.337, 1803.987, "", 
  597.029, 9.59, "", "", 37.746, 0.5, 64.83, 0.511}, 
 {"AFG", "Asia", "Afghanistan", "2020-05-15", 6054., 414., 324.714, 153., 
  17., 6.286, 155.517, 10.635, 8.341, 3.93, 0.437, 0.161, 1.4, "", "", "", 
  "", "", "", "", "", "", "", "", "", "", "", "", "", "", "", "", "", "", "", 
  "", "", "", "", 84.26, 3.8928341*^7, 54.422, 18.6, 2.581, 1.337, 1803.987, 
  "", 597.029, 9.59, "", "", 37.746, 0.5, 64.83, 0.511}, 
 {"AFG", "Asia", "Afghanistan", "2020-05-16", 6403., 349., 337.286, 168., 
  15., 7.571, 164.482, 8.965, 8.664, 4.316, 0.385, 0.194, 1.39, "", "", "", 
  "", "", "", "", "", "", "", "", "", "", "", "", "", "", "", "", "", "", "", 
  "", "", "", "", 84.26, 3.8928341*^7, 54.422, 18.6, 2.581, 1.337, 1803.987, 
  "", 597.029, 9.59, "", "", 37.746, 0.5, 64.83, 0.511}, 
 {"AFG", "Asia", "Afghanistan", "2020-05-17", 6665., 262., 323.143, 170., 2., 
  7.143, 171.212, 6.73, 8.301, 4.367, 0.051, 0.183, 1.39, "", "", "", "", "", 
  "", "", "", "", "", "", "", "", "", "", "", "", "", "", "", "", "", "", "", 
  "", "", 84.26, 3.8928341*^7, 54.422, 18.6, 2.581, 1.337, 1803.987, "", 
  597.029, 9.59, "", "", 37.746, 0.5, 64.83, 0.511}, 
 {"AFG", "Asia", "Afghanistan", "2020-05-18", 7073., 408., 340.857, 173., 3., 
  7.286, 181.693, 10.481, 8.756, 4.444, 0.077, 0.187, 1.39, "", "", "", "", 
  "", "", "", "", "", "", "", "", "", "", "", "", "", "", "", "", "", "", "", 
  "", "", "", 84.26, 3.8928341*^7, 54.422, 18.6, 2.581, 1.337, 1803.987, "", 
  597.029, 9.59, "", "", 37.746, 0.5, 64.83, 0.511}, 
 {"AFG", "Asia", "Afghanistan", "2020-05-19", 7654., 581., 383.714, 178., 5., 
  7.286, 196.618, 14.925, 9.857, 4.573, 0.128, 0.187, 1.39, "", "", "", "", 
  "", "", "", "", "", "", "", "", "", "", "", "", "", "", "", "", "", "", "", 
  "", "", "", 84.26, 3.8928341*^7, 54.422, 18.6, 2.581, 1.337, 1803.987, "", 
  597.029, 9.59, "", "", 37.746, 0.5, 64.83, 0.511}, 
 {"AFG", "Asia", "Afghanistan", "2020-05-20", 8146., 492., 417., 188., 10., 
  8., 209.256, 12.639, 10.712, 4.829, 0.257, 0.206, 1.39, "", "", "", "", "", 
  "", "", "", "", "", "", "", "", "", "", "", "", "", "", "", "", "", "", "", 
  "", "", 84.26, 3.8928341*^7, 54.422, 18.6, 2.581, 1.337, 1803.987, "", 
  597.029, 9.59, "", "", 37.746, 0.5, 64.83, 0.511}, 
 {"AFG", "Asia", "Afghanistan", "2020-05-21", 8677., 531., 433.857, 194., 6., 
  8.286, 222.897, 13.64, 11.145, 4.984, 0.154, 0.213, 1.38, "", "", "", "", 
  "", "", "", "", "", "", "", "", "", "", "", "", "", "", "", "", "", "", "", 
  "", "", "", 84.26, 3.8928341*^7, 54.422, 18.6, 2.581, 1.337, 1803.987, "", 
  597.029, 9.59, "", "", 37.746, 0.5, 64.83, 0.511}, 
 {"AFG", "Asia", "Afghanistan", "2020-05-22", 9219., 542., 452.143, 206., 
  12., 7.571, 236.82, 13.923, 11.615, 5.292, 0.308, 0.194, 1.37, "", "", "", 
  "", "", "", "", "", "", "", "", "", "", "", "", "", "", "", "", "", "", "", 
  "", "", "", "", 84.26, 3.8928341*^7, 54.422, 18.6, 2.581, 1.337, 1803.987, 
  "", 597.029, 9.59, "", "", 37.746, 0.5, 64.83, 0.511}, 
 {"AFG", "Asia", "Afghanistan", "2020-05-23", 10001., 782., 514., 217., 11., 
  7., 256.908, 20.088, 13.204, 5.574, 0.283, 0.18, 1.35, "", "", "", "", "", 
  "", "", "", "", "", "", "", "", "", "", "", "", "", "", "", "", "", "", "", 
  "", "", 84.26, 3.8928341*^7, 54.422, 18.6, 2.581, 1.337, 1803.987, "", 
  597.029, 9.59, "", "", 37.746, 0.5, 64.83, 0.511}, 
 {"AFG", "Asia", "Afghanistan", "2020-05-24", 10585., 584., 560., 219., 2., 
  7., 271.91, 15.002, 14.385, 5.626, 0.051, 0.18, 1.33, "", "", "", "", "", 
  "", "", "", "", "", "", "", "", "", "", "", "", "", "", "", "", "", "", "", 
  "", "", 84.26, 3.8928341*^7, 54.422, 18.6, 2.581, 1.337, 1803.987, "", 
  597.029, 9.59, "", "", 37.746, 0.5, 64.83, 0.511}, 
 {"AFG", "Asia", "Afghanistan", "2020-05-25", 11176., 591., 586.143, 220., 
  1., 6.714, 287.092, 15.182, 15.057, 5.651, 0.026, 0.172, 1.31, "", "", "", 
  "", "", "", "", "", "", "", "", "", "", "", "", "", "", "", "", "", "", "", 
  "", "", "", "", 84.26, 3.8928341*^7, 54.422, 18.6, 2.581, 1.337, 1803.987, 
  "", 597.029, 9.59, "", "", 37.746, 0.5, 64.83, 0.511}, 
 {"AFG", "Asia", "Afghanistan", "2020-05-26", 11834., 658., 597.143, 221., 
  1., 6.143, 303.994, 16.903, 15.34, 5.677, 0.026, 0.158, 1.29, "", "", "", 
  "", "", "", "", "", "", "", "", "", "", "", "", "", "", "", "", "", "", "", 
  "", "", "", "", 84.26, 3.8928341*^7, 54.422, 18.6, 2.581, 1.337, 1803.987, 
  "", 597.029, 9.59, "", "", 37.746, 0.5, 64.83, 0.511}, 
 {"AFG", "Asia", "Afghanistan", "2020-05-27", 12459., 625., 616.143, 228., 
  7., 5.714, 320.05, 16.055, 15.828, 5.857, 0.18, 0.147, 1.27, "", "", "", 
  "", "", "", "", "", "", "", "", "", "", "", "", "", "", "", "", "", "", "", 
  "", "", "", "", 84.26, 3.8928341*^7, 54.422, 18.6, 2.581, 1.337, 1803.987, 
  "", 597.029, 9.59, "", "", 37.746, 0.5, 64.83, 0.511}, 
 {"AFG", "Asia", "Afghanistan", "2020-05-28", 13039., 580., 623.143, 236., 
  8., 6., 334.949, 14.899, 16.007, 6.062, 0.206, 0.154, 1.25, "", "", "", "", 
  "", "", "", "", "", "", "", "", "", "", "", "", "", "", "", "", "", "", "", 
  "", "", "", 84.26, 3.8928341*^7, 54.422, 18.6, 2.581, 1.337, 1803.987, "", 
  597.029, 9.59, "", "", 37.746, 0.5, 64.83, 0.511}, 
 {"AFG", "Asia", "Afghanistan", "2020-05-29", 13662., 623., 634.714, 247., 
  11., 5.857, 350.953, 16.004, 16.305, 6.345, 0.283, 0.15, 1.23, "", "", "", 
  "", "", "", "", "", "", "", "", "", "", "", "", "", "", "", "", "", "", "", 
  "", "", "", "", 84.26, 3.8928341*^7, 54.422, 18.6, 2.581, 1.337, 1803.987, 
  "", 597.029, 9.59, "", "", 37.746, 0.5, 64.83, 0.511}, 
 {"AFG", "Asia", "Afghanistan", "2020-05-30", 14528., 866., 646.714, 250., 
  3., 4.714, 373.199, 22.246, 16.613, 6.422, 0.077, 0.121, 1.22, "", "", "", 
  "", "", "", "", "", "", "", "", "", "", "", "", "", "", "", "", "", "", "", 
  "", "", "", "", 84.26, 3.8928341*^7, 54.422, 18.6, 2.581, 1.337, 1803.987, 
  "", 597.029, 9.59, "", "", 37.746, 0.5, 64.83, 0.511}, 
 {"AFG", "Asia", "Afghanistan", "2020-05-31", 15208., 680., 660.429, 258., 
  8., 5.571, 390.667, 17.468, 16.965, 6.628, 0.206, 0.143, 1.2, "", "", "", 
  "", "", "", "", "", "", "", "", "", "", "", "", "", "", "", "", "", "", "", 
  "", "", "", "", 84.26, 3.8928341*^7, 54.422, 18.6, 2.581, 1.337, 1803.987, 
  "", 597.029, 9.59, "", "", 37.746, 0.5, 64.83, 0.511}, 
 {"AFG", "Asia", "Afghanistan", "2020-06-01", 15753., 545., 653.857, 266., 
  8., 6.571, 404.667, 14., 16.796, 6.833, 0.206, 0.169, 1.18, "", "", "", "", 
  "", "", "", "", "", "", "", "", "", "", "", "", "", "", "", "", "", "", "", 
  "", "", "", 84.26, 3.8928341*^7, 54.422, 18.6, 2.581, 1.337, 1803.987, "", 
  597.029, 9.59, "", "", 37.746, 0.5, 64.83, 0.511}, 
 {"AFG", "Asia", "Afghanistan", "2020-06-02", 16512., 759., 668.286, 274., 
  8., 7.571, 424.164, 19.497, 17.167, 7.039, 0.206, 0.194, 1.16, "", "", "", 
  "", "", "", "", "", "", "", "", "", "", "", "", "", "", "", "", "", "", "", 
  "", "", "", "", 84.26, 3.8928341*^7, 54.422, 18.6, 2.581, 1.337, 1803.987, 
  "", 597.029, 9.59, "", "", 37.746, 0.5, 64.83, 0.511}, 
 {"AFG", "Asia", "Afghanistan", "2020-06-03", 17270., 758., 687.286, 298., 
  24., 10., 443.636, 19.472, 17.655, 7.655, 0.617, 0.257, 1.15, "", "", "", 
  "", "", "", "", "", "", "", "", "", "", "", "", "", "", "", "", "", "", "", 
  "", "", "", "", 84.26, 3.8928341*^7, 54.422, 18.6, 2.581, 1.337, 1803.987, 
  "", 597.029, 9.59, "", "", 37.746, 0.5, 64.83, 0.511}, 
 {"AFG", "Asia", "Afghanistan", "2020-06-04", 18057., 787., 716.857, 304., 
  6., 9.714, 463.852, 20.217, 18.415, 7.809, 0.154, 0.25, 1.13, "", "", "", 
  "", "", "", "", "", "", "", "", "", "", "", "", "", "", "", "", "", "", "", 
  "", "", "", "", 84.26, 3.8928341*^7, 54.422, 18.6, 2.581, 1.337, 1803.987, 
  "", 597.029, 9.59, "", "", 37.746, 0.5, 64.83, 0.511}, 
 {"AFG", "Asia", "Afghanistan", "2020-06-05", 18972., 915., 758.571, 313., 
  9., 9.429, 487.357, 23.505, 19.486, 8.04, 0.231, 0.242, 1.11, "", "", "", 
  "", "", "", "", "", "", "", "", "", "", "", "", "", "", "", "", "", "", "", 
  "", "", "", "", 84.26, 3.8928341*^7, 54.422, 18.6, 2.581, 1.337, 1803.987, 
  "", 597.029, 9.59, "", "", 37.746, 0.5, 64.83, 0.511}, 
 {"AFG", "Asia", "Afghanistan", "2020-06-06", 19554., 582., 718., 331., 18., 
  11.571, 502.308, 14.951, 18.444, 8.503, 0.462, 0.297, 1.08, "", "", "", "", 
  "", "", "", "", "", "", "", "", "", "", "", "", "", "", "", "", "", "", "", 
  "", "", "", 84.26, 3.8928341*^7, 54.422, 18.6, 2.581, 1.337, 1803.987, "", 
  597.029, 9.59, "", "", 37.746, 0.5, 64.83, 0.511}, 
 {"AFG", "Asia", "Afghanistan", "2020-06-07", 20345., 791., 733.857, 361., 
  30., 14.714, 522.627, 20.319, 18.851, 9.273, 0.771, 0.378, 1.06, "", "", 
  "", "", "", "", "", "", "", "", "", "", "", "", "", "", "", "", "", "", "", 
  "", "", "", "", "", 84.26, 3.8928341*^7, 54.422, 18.6, 2.581, 1.337, 
  1803.987, "", 597.029, 9.59, "", "", 37.746, 0.5, 64.83, 0.511}, 
 {"AFG", "Asia", "Afghanistan", "2020-06-08", 20920., 575., 738.143, 373., 
  12., 15.286, 537.398, 14.771, 18.962, 9.582, 0.308, 0.393, 1.04, "", "", 
  "", "", "", "", "", "", "", "", "", "", "", "", "", "", "", "", "", "", "", 
  "", "", "", "", "", 84.26, 3.8928341*^7, 54.422, 18.6, 2.581, 1.337, 
  1803.987, "", 597.029, 9.59, "", "", 37.746, 0.5, 64.83, 0.511}, 
 {"AFG", "Asia", "Afghanistan", "2020-06-09", 21462., 542., 707.143, 388., 
  15., 16.286, 551.321, 13.923, 18.165, 9.967, 0.385, 0.418, 1.02, "", "", 
  "", "", "", "", "", "", "", "", "", "", "", "", "", "", "", "", "", "", "", 
  "", "", "", "", "", 78.7, 3.8928341*^7, 54.422, 18.6, 2.581, 1.337, 
  1803.987, "", 597.029, 9.59, "", "", 37.746, 0.5, 64.83, 0.511}, 
 {"AFG", "Asia", "Afghanistan", "2020-06-10", 22146., 684., 696.571, 409., 
  21., 15.857, 568.891, 17.571, 17.894, 10.506, 0.539, 0.407, 1.01, "", "", 
  "", "", "", "", "", "", "", "", "", "", "", "", "", "", "", "", "", "", "", 
  "", "", "", "", "", 78.7, 3.8928341*^7, 54.422, 18.6, 2.581, 1.337, 
  1803.987, "", 597.029, 9.59, "", "", 37.746, 0.5, 64.83, 0.511}, 
 {"AFG", "Asia", "Afghanistan", "2020-06-11", 22894., 748., 691., 430., 21., 
  18., 588.106, 19.215, 17.751, 11.046, 0.539, 0.462, 0.99, "", "", "", "", 
  "", "", "", "", "", "", "", "", "", "", "", "", "", "", "", "", "", "", "", 
  "", "", "", 78.7, 3.8928341*^7, 54.422, 18.6, 2.581, 1.337, 1803.987, "", 
  597.029, 9.59, "", "", 37.746, 0.5, 64.83, 0.511}, 
 {"AFG", "Asia", "Afghanistan", "2020-06-12", 23550., 656., 654., 450., 20., 
  19.571, 604.958, 16.851, 16.8, 11.56, 0.514, 0.503, 0.98, "", "", "", "", 
  "", "", "", "", "", "", "", "", "", "", "", "", "", "", "", "", "", "", "", 
  "", "", "", 78.7, 3.8928341*^7, 54.422, 18.6, 2.581, 1.337, 1803.987, "", 
  597.029, 9.59, "", "", 37.746, 0.5, 64.83, 0.511}, 
 {"AFG", "Asia", "Afghanistan", "2020-06-13", 24106., 556., 650.286, 455., 
  5., 17.714, 619.24, 14.283, 16.705, 11.688, 0.128, 0.455, 0.96, "", "", "", 
  "", "", "", "", "", "", "", "", "", "", "", "", "", "", "", "", "", "", "", 
  "", "", "", "", 78.7, 3.8928341*^7, 54.422, 18.6, 2.581, 1.337, 1803.987, 
  "", 597.029, 9.59, "", "", 37.746, 0.5, 64.83, 0.511}, 
 {"AFG", "Asia", "Afghanistan", "2020-06-14", 24770., 664., 632.143, 475., 
  20., 16.286, 636.297, 17.057, 16.239, 12.202, 0.514, 0.418, 0.95, "", "", 
  "", "", "", "", "", "", "", "", "", "", "", "", "", "", "", "", "", "", "", 
  "", "", "", "", "", 78.7, 3.8928341*^7, 54.422, 18.6, 2.581, 1.337, 
  1803.987, "", 597.029, 9.59, "", "", 37.746, 0.5, 64.83, 0.511}, 
 {"AFG", "Asia", "Afghanistan", "2020-06-15", 25531., 761., 658.714, 482., 
  7., 15.571, 655.846, 19.549, 16.921, 12.382, 0.18, 0.4, 0.94, "", "", "", 
  "", "", "", "", "", "", "", "", "", "", "", "", "", "", "", "", "", "", "", 
  "", "", "", "", 78.7, 3.8928341*^7, 54.422, 18.6, 2.581, 1.337, 1803.987, 
  "", 597.029, 9.59, "", "", 37.746, 0.5, 64.83, 0.511}, 
 {"AFG", "Asia", "Afghanistan", "2020-06-16", 26314., 783., 693.143, 495., 
  13., 15.286, 675.96, 20.114, 17.806, 12.716, 0.334, 0.393, 0.91, "", "", 
  "", "", "", "", "", "", "", "", "", "", "", "", "", "", "", "", "", "", "", 
  "", "", "", "", "", 78.7, 3.8928341*^7, 54.422, 18.6, 2.581, 1.337, 
  1803.987, "", 597.029, 9.59, "", "", 37.746, 0.5, 64.83, 0.511}, 
 {"AFG", "Asia", "Afghanistan", "2020-06-17", 26878., 564., 676., 508., 13., 
  14.143, 690.448, 14.488, 17.365, 13.05, 0.334, 0.363, 0.89, "", "", "", "", 
  "", "", "", "", "", "", "", "", "", "", "", "", "", "", "", "", "", "", "", 
  "", "", "", 78.7, 3.8928341*^7, 54.422, 18.6, 2.581, 1.337, 1803.987, "", 
  597.029, 9.59, "", "", 37.746, 0.5, 64.83, 0.511}, 
 {"AFG", "Asia", "Afghanistan", "2020-06-18", 27536., 658., 663.143, 550., 
  42., 17.143, 707.351, 16.903, 17.035, 14.129, 1.079, 0.44, 0.86, "", "", 
  "", "", "", "", "", "", "", "", "", "", "", "", "", "", "", "", "", "", "", 
  "", "", "", "", "", 78.7, 3.8928341*^7, 54.422, 18.6, 2.581, 1.337, 
  1803.987, "", 597.029, 9.59, "", "", 37.746, 0.5, 64.83, 0.511}, 
 {"AFG", "Asia", "Afghanistan", "2020-06-19", 27882., 346., 618.857, 552., 
  2., 14.571, 716.239, 8.888, 15.897, 14.18, 0.051, 0.374, 0.84, "", "", "", 
  "", "", "", "", "", "", "", "", "", "", "", "", "", "", "", "", "", "", "", 
  "", "", "", "", 78.7, 3.8928341*^7, 54.422, 18.6, 2.581, 1.337, 1803.987, 
  "", 597.029, 9.59, "", "", 37.746, 0.5, 64.83, 0.511}, 
 {"AFG", "Asia", "Afghanistan", "2020-06-20", 28428., 546., 617.429, 573., 
  21., 16.857, 730.265, 14.026, 15.861, 14.719, 0.539, 0.433, 0.82, "", "", 
  "", "", "", "", "", "", "", "", "", "", "", "", "", "", "", "", "", "", "", 
  "", "", "", "", "", 78.7, 3.8928341*^7, 54.422, 18.6, 2.581, 1.337, 
  1803.987, "", 597.029, 9.59, "", "", 37.746, 0.5, 64.83, 0.511}, 
 {"AFG", "Asia", "Afghanistan", "2020-06-21", 28837., 409., 581., 585., 12., 
  15.714, 740.771, 10.506, 14.925, 15.028, 0.308, 0.404, 0.8, "", "", "", "", 
  "", "", "", "", "", "", "", "", "", "", "", "", "", "", "", "", "", "", "", 
  "", "", "", 78.7, 3.8928341*^7, 54.422, 18.6, 2.581, 1.337, 1803.987, "", 
  597.029, 9.59, "", "", 37.746, 0.5, 64.83, 0.511}, 
 {"AFG", "Asia", "Afghanistan", "2020-06-22", 29147., 310., 516.571, 597., 
  12., 16.429, 748.735, 7.963, 13.27, 15.336, 0.308, 0.422, 0.78, "", "", "", 
  "", "", "", "", "", "", "", "", "", "", "", "", "", "", "", "", "", "", "", 
  "", "", "", "", 78.7, 3.8928341*^7, 54.422, 18.6, 2.581, 1.337, 1803.987, 
  "", 597.029, 9.59, "", "", 37.746, 0.5, 64.83, 0.511}, 
 {"AFG", "Asia", "Afghanistan", "2020-06-23", 29471., 324., 451., 617., 20., 
  17.429, 757.058, 8.323, 11.585, 15.85, 0.514, 0.448, 0.76, "", "", "", "", 
  "", "", "", "", "", "", "", "", "", "", "", "", "", "", "", "", "", "", "", 
  "", "", "", 78.7, 3.8928341*^7, 54.422, 18.6, 2.581, 1.337, 1803.987, "", 
  597.029, 9.59, "", "", 37.746, 0.5, 64.83, 0.511}, 
 {"AFG", "Asia", "Afghanistan", "2020-06-24", 29705., 234., 403.857, 638., 
  21., 18.571, 763.069, 6.011, 10.374, 16.389, 0.539, 0.477, 0.75, "", "", 
  "", "", "", "", "", "", "", "", "", "", "", "", "", "", "", "", "", "", "", 
  "", "", "", "", "", 78.7, 3.8928341*^7, 54.422, 18.6, 2.581, 1.337, 
  1803.987, "", 597.029, 9.59, "", "", 37.746, 0.5, 64.83, 0.511}, 
 {"AFG", "Asia", "Afghanistan", "2020-06-25", 30165., 460., 375.571, 674., 
  36., 17.714, 774.885, 11.817, 9.648, 17.314, 0.925, 0.455, 0.75, "", "", 
  "", "", "", "", "", "", "", "", "", "", "", "", "", "", "", "", "", "", "", 
  "", "", "", "", "", 78.7, 3.8928341*^7, 54.422, 18.6, 2.581, 1.337, 
  1803.987, "", 597.029, 9.59, "", "", 37.746, 0.5, 64.83, 0.511}, 
 {"AFG", "Asia", "Afghanistan", "2020-06-26", 30441., 276., 365.571, 682., 
  8., 18.571, 781.975, 7.09, 9.391, 17.519, 0.206, 0.477, 0.75, "", "", "", 
  "", "", "", "", "", "", "", "", "", "", "", "", "", "", "", "", "", "", "", 
  "", "", "", "", 78.7, 3.8928341*^7, 54.422, 18.6, 2.581, 1.337, 1803.987, 
  "", 597.029, 9.59, "", "", 37.746, 0.5, 64.83, 0.511}, 
 {"AFG", "Asia", "Afghanistan", "2020-06-27", 30606., 165., 311.143, 716., 
  34., 20.429, 786.214, 4.239, 7.993, 18.393, 0.873, 0.525, 0.74, "", "", "", 
  "", "", "", "", "", "", "", "", "", "", "", "", "", "", "", "", "", "", "", 
  "", "", "", "", 78.7, 3.8928341*^7, 54.422, 18.6, 2.581, 1.337, 1803.987, 
  "", 597.029, 9.59, "", "", 37.746, 0.5, 64.83, 0.511}, 
 {"AFG", "Asia", "Afghanistan", "2020-06-28", 30957., 351., 302.857, 728., 
  12., 20.429, 795.23, 9.017, 7.78, 18.701, 0.308, 0.525, 0.75, "", "", "", 
  "", "", "", "", "", "", "", "", "", "", "", "", "", "", "", "", "", "", "", 
  "", "", "", "", 78.7, 3.8928341*^7, 54.422, 18.6, 2.581, 1.337, 1803.987, 
  "", 597.029, 9.59, "", "", 37.746, 0.5, 64.83, 0.511}, 
 {"AFG", "Asia", "Afghanistan", "2020-06-29", 31228., 271., 297.286, 740., 
  12., 20.429, 802.192, 6.962, 7.637, 19.009, 0.308, 0.525, 0.75, "", "", "", 
  "", "", "", "", "", "", "", "", "", "", "", "", "", "", "", "", "", "", "", 
  "", "", "", "", 78.7, 3.8928341*^7, 54.422, 18.6, 2.581, 1.337, 1803.987, 
  "", 597.029, 9.59, "", "", 37.746, 0.5, 64.83, 0.511}, 
 {"AFG", "Asia", "Afghanistan", "2020-06-30", 31507., 279., 290.857, 752., 
  12., 19.286, 809.359, 7.167, 7.472, 19.318, 0.308, 0.495, 0.75, "", "", "", 
  "", "", "", "", "", "", "", "", "", "", "", "", "", "", "", "", "", "", "", 
  "", "", "", "", 78.7, 3.8928341*^7, 54.422, 18.6, 2.581, 1.337, 1803.987, 
  "", 597.029, 9.59, "", "", 37.746, 0.5, 64.83, 0.511}, 
 {"AFG", "Asia", "Afghanistan", "2020-07-01", 31826., 319., 303., 780., 28., 
  20.286, 817.553, 8.195, 7.784, 20.037, 0.719, 0.521, 0.76, "", "", "", "", 
  "", "", "", "", "", "", "", "", "", "", "", "", "", "", "", "", "", "", "", 
  "", "", "", 78.7, 3.8928341*^7, 54.422, 18.6, 2.581, 1.337, 1803.987, "", 
  597.029, 9.59, "", "", 37.746, 0.5, 64.83, 0.511}, 
 {"AFG", "Asia", "Afghanistan", "2020-07-02", 32012., 186., 263.857, 809., 
  29., 19.286, 822.331, 4.778, 6.778, 20.782, 0.745, 0.495, 0.76, "", "", "", 
  "", "", "", "", "", "", "", "", "", "", "", "", "", "", "", "", "", "", "", 
  "", "", "", "", 78.7, 3.8928341*^7, 54.422, 18.6, 2.581, 1.337, 1803.987, 
  "", 597.029, 9.59, "", "", 37.746, 0.5, 64.83, 0.511}, 
 {"AFG", "Asia", "Afghanistan", "2020-07-03", 32314., 302., 267.571, 821., 
  12., 19.857, 830.089, 7.758, 6.873, 21.09, 0.308, 0.51, 0.76, "", "", "", 
  "", "", "", "", "", "", "", "", "", "", "", "", "", "", "", "", "", "", "", 
  "", "", "", "", 78.7, 3.8928341*^7, 54.422, 18.6, 2.581, 1.337, 1803.987, 
  "", 597.029, 9.59, "", "", 37.746, 0.5, 64.83, 0.511}, 
 {"AFG", "Asia", "Afghanistan", "2020-07-04", 32662., 348., 293.714, 828., 
  7., 16., 839.029, 8.94, 7.545, 21.27, 0.18, 0.411, 0.77, "", "", "", "", 
  "", "", "", "", "", "", "", "", "", "", "", "", "", "", "", "", "", "", "", 
  "", "", "", 78.7, 3.8928341*^7, 54.422, 18.6, 2.581, 1.337, 1803.987, "", 
  597.029, 9.59, "", "", 37.746, 0.5, 64.83, 0.511}, 
 {"AFG", "Asia", "Afghanistan", "2020-07-05", 32941., 279., 283.429, 866., 
  38., 19.714, 846.196, 7.167, 7.281, 22.246, 0.976, 0.506, 0.77, "", "", "", 
  "", "", "", "", "", "", "", "", "", "", "", "", "", "", "", "", "", "", "", 
  "", "", "", "", 78.7, 3.8928341*^7, 54.422, 18.6, 2.581, 1.337, 1803.987, 
  "", 597.029, 9.59, "", "", 37.746, 0.5, 64.83, 0.511}, 
 {"AFG", "Asia", "Afghanistan", "2020-07-06", 33180., 239., 278.857, 900., 
  34., 22.857, 852.335, 6.139, 7.163, 23.119, 0.873, 0.587, 0.76, "", "", "", 
  "", "", "", "", "", "", "", "", "", "", "", "", "", "", "", "", "", "", "", 
  "", "", "", "", 78.7, 3.8928341*^7, 54.422, 18.6, 2.581, 1.337, 1803.987, 
  "", 597.029, 9.59, "", "", 37.746, 0.5, 64.83, 0.511}, 
 {"AFG", "Asia", "Afghanistan", "2020-07-07", 33374., 194., 266.714, 922., 
  22., 24.286, 857.319, 4.984, 6.851, 23.685, 0.565, 0.624, 0.75, "", "", "", 
  "", "", "", "", "", "", "", "", "", "", "", "", "", "", "", "", "", "", "", 
  "", "", "", "", 78.7, 3.8928341*^7, 54.422, 18.6, 2.581, 1.337, 1803.987, 
  "", 597.029, 9.59, "", "", 37.746, 0.5, 64.83, 0.511}, 
 {"AFG", "Asia", "Afghanistan", "2020-07-08", 33584., 210., 251.143, 939., 
  17., 22.714, 862.713, 5.395, 6.451, 24.121, 0.437, 0.583, 0.75, "", "", "", 
  "", "", "", "", "", "", "", "", "", "", "", "", "", "", "", "", "", "", "", 
  "", "", "", "", 78.7, 3.8928341*^7, 54.422, 18.6, 2.581, 1.337, 1803.987, 
  "", 597.029, 9.59, "", "", 37.746, 0.5, 64.83, 0.511}, 
 {"AFG", "Asia", "Afghanistan", "2020-07-09", 33898., 314., 269.429, 959., 
  20., 21.429, 870.779, 8.066, 6.921, 24.635, 0.514, 0.55, 0.75, "", "", "", 
  "", "", "", "", "", "", "", "", "", "", "", "", "", "", "", "", "", "", "", 
  "", "", "", "", 78.7, 3.8928341*^7, 54.422, 18.6, 2.581, 1.337, 1803.987, 
  "", 597.029, 9.59, "", "", 37.746, 0.5, 64.83, 0.511}, 
 {"AFG", "Asia", "Afghanistan", "2020-07-10", 34184., 286., 267.143, 973., 
  14., 21.714, 878.126, 7.347, 6.862, 24.995, 0.36, 0.558, 0.74, "", "", "", 
  "", "", "", "", "", "", "", "", "", "", "", "", "", "", "", "", "", "", "", 
  "", "", "", "", 78.7, 3.8928341*^7, 54.422, 18.6, 2.581, 1.337, 1803.987, 
  "", 597.029, 9.59, "", "", 37.746, 0.5, 64.83, 0.511}, 
 {"AFG", "Asia", "Afghanistan", "2020-07-11", 34356., 172., 242., 996., 23., 
  24., 882.545, 4.418, 6.217, 25.585, 0.591, 0.617, 0.73, "", "", "", "", "", 
  "", "", "", "", "", "", "", "", "", "", "", "", "", "", "", "", "", "", "", 
  "", "", 78.7, 3.8928341*^7, 54.422, 18.6, 2.581, 1.337, 1803.987, "", 
  597.029, 9.59, "", "", 37.746, 0.5, 64.83, 0.511}, 
 {"AFG", "Asia", "Afghanistan", "2020-07-12", 34441., 85., 214.286, 1012., 
  16., 20.857, 884.728, 2.183, 5.505, 25.996, 0.411, 0.536, 0.71, "", "", "", 
  "", "", "", "", "", "", "", "", "", "", "", "", "", "", "", "", "", "", "", 
  "", "", "", "", 78.7, 3.8928341*^7, 54.422, 18.6, 2.581, 1.337, 1803.987, 
  "", 597.029, 9.59, "", "", 37.746, 0.5, 64.83, 0.511}, 
 {"AFG", "Asia", "Afghanistan", "2020-07-13", 34595., 154., 202.143, 1040., 
  28., 20., 888.684, 3.956, 5.193, 26.716, 0.719, 0.514, 0.71, "", "", "", 
  "", "", "", "", "", "", "", "", "", "", "", "", "", "", "", "", "", "", "", 
  "", "", "", "", 78.7, 3.8928341*^7, 54.422, 18.6, 2.581, 1.337, 1803.987, 
  "", 597.029, 9.59, "", "", 37.746, 0.5, 64.83, 0.511}, 
 {"AFG", "Asia", "Afghanistan", "2020-07-14", 34730., 135., 193.714, 1064., 
  24., 20.286, 892.152, 3.468, 4.976, 27.332, 0.617, 0.521, 0.71, "", "", "", 
  "", "", "", "", "", "", "", "", "", "", "", "", "", "", "", "", "", "", "", 
  "", "", "", "", 78.7, 3.8928341*^7, 54.422, 18.6, 2.581, 1.337, 1803.987, 
  "", 597.029, 9.59, "", "", 37.746, 0.5, 64.83, 0.511}, 
 {"AFG", "Asia", "Afghanistan", "2020-07-15", 34984., 254., 200., 1096., 32., 
  22.429, 898.677, 6.525, 5.138, 28.154, 0.822, 0.576, 0.7, "", "", "", "", 
  "", "", "", "", "", "", "", "", "", "", "", "", "", "", "", "", "", "", "", 
  "", "", "", 78.7, 3.8928341*^7, 54.422, 18.6, 2.581, 1.337, 1803.987, "", 
  597.029, 9.59, "", "", 37.746, 0.5, 64.83, 0.511}, 
 {"AFG", "Asia", "Afghanistan", "2020-07-16", 35060., 76., 166., 1117., 21., 
  22.571, 900.629, 1.952, 4.264, 28.694, 0.539, 0.58, 0.7, "", "", "", "", 
  "", "", "", "", "", "", "", "", "", "", "", "", "", "", "", "", "", "", "", 
  "", "", "", 78.7, 3.8928341*^7, 54.422, 18.6, 2.581, 1.337, 1803.987, "", 
  597.029, 9.59, "", "", 37.746, 0.5, 64.83, 0.511}, 
 {"AFG", "Asia", "Afghanistan", "2020-07-17", 35219., 159., 147.857, 1149., 
  32., 25.143, 904.714, 4.084, 3.798, 29.516, 0.822, 0.646, 0.7, "", "", "", 
  "", "", "", "", "", "", "", "", "", "", "", "", "", "", "", "", "", "", "", 
  "", "", "", "", 78.7, 3.8928341*^7, 54.422, 18.6, 2.581, 1.337, 1803.987, 
  "", 597.029, 9.59, "", "", 37.746, 0.5, 64.83, 0.511}, 
 {"AFG", "Asia", "Afghanistan", "2020-07-18", 35279., 60., 131.857, 1166., 
  17., 24.286, 906.255, 1.541, 3.387, 29.952, 0.437, 0.624, 0.7, "", "", "", 
  "", "", "", "", "", "", "", "", "", "", "", "", "", "", "", "", "", "", "", 
  "", "", "", "", 78.7, 3.8928341*^7, 54.422, 18.6, 2.581, 1.337, 1803.987, 
  "", 597.029, 9.59, "", "", 37.746, 0.5, 64.83, 0.511}, 
 {"AFG", "Asia", "Afghanistan", "2020-07-19", 35453., 174., 144.571, 1183., 
  17., 24.429, 910.725, 4.47, 3.714, 30.389, 0.437, 0.628, 0.7, "", "", "", 
  "", "", "", "", "", "", "", "", "", "", "", "", "", "", "", "", "", "", "", 
  "", "", "", "", 78.7, 3.8928341*^7, 54.422, 18.6, 2.581, 1.337, 1803.987, 
  "", 597.029, 9.59, "", "", 37.746, 0.5, 64.83, 0.511}, 
 {"AFG", "Asia", "Afghanistan", "2020-07-20", 35493., 40., 128.286, 1185., 
  2., 20.714, 911.752, 1.028, 3.295, 30.441, 0.051, 0.532, 0.7, "", "", "", 
  "", "", "", "", "", "", "", "", "", "", "", "", "", "", "", "", "", "", "", 
  "", "", "", "", 78.7, 3.8928341*^7, 54.422, 18.6, 2.581, 1.337, 1803.987, 
  "", 597.029, 9.59, "", "", 37.746, 0.5, 64.83, 0.511}, 
 {"AFG", "Asia", "Afghanistan", "2020-07-21", 35605., 112., 125., 1188., 3., 
  17.714, 914.629, 2.877, 3.211, 30.518, 0.077, 0.455, 0.71, "", "", "", "", 
  "", "", "", "", "", "", "", "", "", "", "", "", "", "", "", "", "", "", "", 
  "", "", "", 78.7, 3.8928341*^7, 54.422, 18.6, 2.581, 1.337, 1803.987, "", 
  597.029, 9.59, "", "", 37.746, 0.5, 64.83, 0.511}, 
 {"AFG", "Asia", "Afghanistan", "2020-07-22", 35717., 112., 104.714, 1192., 
  4., 13.714, 917.506, 2.877, 2.69, 30.62, 0.103, 0.352, 0.71, "", "", "", 
  "", "", "", "", "", "", "", "", "", "", "", "", "", "", "", "", "", "", "", 
  "", "", "", "", 78.7, 3.8928341*^7, 54.422, 18.6, 2.581, 1.337, 1803.987, 
  "", 597.029, 9.59, "", "", 37.746, 0.5, 64.83, 0.511}, 
 {"AFG", "Asia", "Afghanistan", "2020-07-23", 35918., 201., 122.571, 1213., 
  21., 13.714, 922.67, 5.163, 3.149, 31.16, 0.539, 0.352, 0.72, "", "", "", 
  "", "", "", "", "", "", "", "", "", "", "", "", "", "", "", "", "", "", "", 
  "", "", "", "", 78.7, 3.8928341*^7, 54.422, 18.6, 2.581, 1.337, 1803.987, 
  "", 597.029, 9.59, "", "", 37.746, 0.5, 64.83, 0.511}, 
 {"AFG", "Asia", "Afghanistan", "2020-07-24", 35978., 60., 108.429, 1227., 
  14., 11.143, 924.211, 1.541, 2.785, 31.519, 0.36, 0.286, 0.72, "", "", "", 
  "", "", "", "", "", "", "", "", "", "", "", "", "", "", "", "", "", "", "", 
  "", "", "", "", 78.7, 3.8928341*^7, 54.422, 18.6, 2.581, 1.337, 1803.987, 
  "", 597.029, 9.59, "", "", 37.746, 0.5, 64.83, 0.511}, 
 {"AFG", "Asia", "Afghanistan", "2020-07-25", 36026., 48., 106.714, 1249., 
  22., 11.857, 925.444, 1.233, 2.741, 32.085, 0.565, 0.305, 0.72, "", "", "", 
  "", "", "", "", "", "", "", "", "", "", "", "", "", "", "", "", "", "", "", 
  "", "", "", "", 78.7, 3.8928341*^7, 54.422, 18.6, 2.581, 1.337, 1803.987, 
  "", 597.029, 9.59, "", "", 37.746, 0.5, 64.83, 0.511}, 
 {"AFG", "Asia", "Afghanistan", "2020-07-26", 36147., 121., 99.143, 1261., 
  12., 11.143, 928.552, 3.108, 2.547, 32.393, 0.308, 0.286, 0.73, "", "", "", 
  "", "", "", "", "", "", "", "", "", "", "", "", "", "", "", "", "", "", "", 
  "", "", "", "", 78.7, 3.8928341*^7, 54.422, 18.6, 2.581, 1.337, 1803.987, 
  "", 597.029, 9.59, "", "", 37.746, 0.5, 64.83, 0.511}, 
 {"AFG", "Asia", "Afghanistan", "2020-07-27", 36253., 106., 108.571, 1271., 
  10., 12.286, 931.275, 2.723, 2.789, 32.65, 0.257, 0.316, 0.73, "", "", "", 
  "", "", "", "", "", "", "", "", "", "", "", "", "", "", "", "", "", "", "", 
  "", "", "", "", 78.7, 3.8928341*^7, 54.422, 18.6, 2.581, 1.337, 1803.987, 
  "", 597.029, 9.59, "", "", 37.746, 0.5, 64.83, 0.511}, 
 {"AFG", "Asia", "Afghanistan", "2020-07-28", 36358., 105., 107.571, 1272., 
  1., 12., 933.973, 2.697, 2.763, 32.675, 0.026, 0.308, 0.73, "", "", "", "", 
  "", "", "", "", "", "", "", "", "", "", "", "", "", "", "", "", "", "", "", 
  "", "", "", 78.7, 3.8928341*^7, 54.422, 18.6, 2.581, 1.337, 1803.987, "", 
  597.029, 9.59, "", "", 37.746, 0.5, 64.83, 0.511}, 
 {"AFG", "Asia", "Afghanistan", "2020-07-29", 36463., 105., 106.571, 1273., 
  1., 11.571, 936.67, 2.697, 2.738, 32.701, 0.026, 0.297, 0.73, "", "", "", 
  "", "", "", "", "", "", "", "", "", "", "", "", "", "", "", "", "", "", "", 
  "", "", "", "", 78.7, 3.8928341*^7, 54.422, 18.6, 2.581, 1.337, 1803.987, 
  "", 597.029, 9.59, "", "", 37.746, 0.5, 64.83, 0.511}, 
 {"AFG", "Asia", "Afghanistan", "2020-07-30", 36532., 69., 87.714, 1283., 
  10., 10., 938.442, 1.772, 2.253, 32.958, 0.257, 0.257, 0.72, "", "", "", 
  "", "", "", "", "", "", "", "", "", "", "", "", "", "", "", "", "", "", "", 
  "", "", "", "", 78.7, 3.8928341*^7, 54.422, 18.6, 2.581, 1.337, 1803.987, 
  "", 597.029, 9.59, "", "", 37.746, 0.5, 64.83, 0.511}, 
 {"AFG", "Asia", "Afghanistan", "2020-07-31", 36665., 133., 98.143, 1284., 
  1., 8.143, 941.859, 3.417, 2.521, 32.984, 0.026, 0.209, 0.73, "", "", "", 
  "", "", "", "", "", "", "", "", "", "", "", "", "", "", "", "", "", "", "", 
  "", "", "", "", 78.7, 3.8928341*^7, 54.422, 18.6, 2.581, 1.337, 1803.987, 
  "", 597.029, 9.59, "", "", 37.746, 0.5, 64.83, 0.511}, 
 {"AFG", "Asia", "Afghanistan", "2020-08-01", 36700., 35., 96.286, 1285., 1., 
  5.143, 942.758, 0.899, 2.473, 33.009, 0.026, 0.132, 0.72, "", "", "", "", 
  "", "", "", "", "", "", "", "", "", "", "", "", "", "", "", "", "", "", "", 
  "", "", "", 78.7, 3.8928341*^7, 54.422, 18.6, 2.581, 1.337, 1803.987, "", 
  597.029, 9.59, "", "", 37.746, 0.5, 64.83, 0.511}, 
 {"AFG", "Asia", "Afghanistan", "2020-08-02", 36701., 1., 79.143, 1286., 1., 
  3.571, 942.784, 0.026, 2.033, 33.035, 0.026, 0.092, 0.71, "", "", "", "", 
  "", "", "", "", "", "", "", "", "", "", "", "", "", "", "", "", "", "", "", 
  "", "", "", 78.7, 3.8928341*^7, 54.422, 18.6, 2.581, 1.337, 1803.987, "", 
  597.029, 9.59, "", "", 37.746, 0.5, 64.83, 0.511}, 
 {"AFG", "Asia", "Afghanistan", "2020-08-03", 36737., 36., 69.143, 1290., 4., 
  2.714, 943.708, 0.925, 1.776, 33.138, 0.103, 0.07, 0.72, "", "", "", "", 
  "", "", "", "", "", "", "", "", "", "", "", "", "", "", "", "", "", "", "", 
  "", "", "", 78.7, 3.8928341*^7, 54.422, 18.6, 2.581, 1.337, 1803.987, "", 
  597.029, 9.59, "", "", 37.746, 0.5, 64.83, 0.511}, 
 {"AFG", "Asia", "Afghanistan", "2020-08-04", 36773., 36., 59.286, 1290., 0., 
  2.571, 944.633, 0.925, 1.523, 33.138, 0., 0.066, 0.74, "", "", "", "", "", 
  "", "", "", "", "", "", "", "", "", "", "", "", "", "", "", "", "", "", "", 
  "", "", 75., 3.8928341*^7, 54.422, 18.6, 2.581, 1.337, 1803.987, "", 
  597.029, 9.59, "", "", 37.746, 0.5, 64.83, 0.511}, 
 {"AFG", "Asia", "Afghanistan", "2020-08-05", 36820., 47., 51., 1296., 6., 
  3.286, 945.84, 1.207, 1.31, 33.292, 0.154, 0.084, 0.77, "", "", "", "", "", 
  "", "", "", "", "", "", "", "", "", "", "", "", "", "", "", "", "", "", "", 
  "", "", 71.3, 3.8928341*^7, 54.422, 18.6, 2.581, 1.337, 1803.987, "", 
  597.029, 9.59, "", "", 37.746, 0.5, 64.83, 0.511}, 
 {"AFG", "Asia", "Afghanistan", "2020-08-06", 36928., 108., 56.571, 1301., 
  5., 2.571, 948.615, 2.774, 1.453, 33.42, 0.128, 0.066, 0.8, "", "", "", "", 
  "", "", "", "", "", "", "", "", "", "", "", "", "", "", "", "", "", "", "", 
  "", "", "", 71.3, 3.8928341*^7, 54.422, 18.6, 2.581, 1.337, 1803.987, "", 
  597.029, 9.59, "", "", 37.746, 0.5, 64.83, 0.511}, 
 {"AFG", "Asia", "Afghanistan", "2020-08-07", 37006., 78., 48.714, 1310., 9., 
  3.714, 950.618, 2.004, 1.251, 33.652, 0.231, 0.095, 0.82, "", "", "", "", 
  "", "", "", "", "", "", "", "", "", "", "", "", "", "", "", "", "", "", "", 
  "", "", "", 71.3, 3.8928341*^7, 54.422, 18.6, 2.581, 1.337, 1803.987, "", 
  597.029, 9.59, "", "", 37.746, 0.5, 64.83, 0.511}, 
 {"AFG", "Asia", "Afghanistan", "2020-08-08", 37046., 40., 49.429, 1315., 5., 
  4.286, 951.646, 1.028, 1.27, 33.78, 0.128, 0.11, 0.83, "", "", "", "", "", 
  "", "", "", "", "", "", "", "", "", "", "", "", "", "", "", "", "", "", "", 
  "", "", 71.3, 3.8928341*^7, 54.422, 18.6, 2.581, 1.337, 1803.987, "", 
  597.029, 9.59, "", "", 37.746, 0.5, 64.83, 0.511}, 
 {"AFG", "Asia", "Afghanistan", "2020-08-09", 37083., 37., 54.571, 1321., 6., 
  5., 952.596, 0.95, 1.402, 33.934, 0.154, 0.128, 0.84, "", "", "", "", "", 
  "", "", "", "", "", "", "", "", "", "", "", "", "", "", "", "", "", "", "", 
  "", "", 71.3, 3.8928341*^7, 54.422, 18.6, 2.581, 1.337, 1803.987, "", 
  597.029, 9.59, "", "", 37.746, 0.5, 64.83, 0.511}, 
 {"AFG", "Asia", "Afghanistan", "2020-08-10", 37153., 70., 59.429, 1329., 8., 
  5.571, 954.395, 1.798, 1.527, 34.14, 0.206, 0.143, 0.86, "", "", "", "", 
  "", "", "", "", "", "", "", "", "", "", "", "", "", "", "", "", "", "", "", 
  "", "", "", 71.3, 3.8928341*^7, 54.422, 18.6, 2.581, 1.337, 1803.987, "", 
  597.029, 9.59, "", "", 37.746, 0.5, 64.83, 0.511}, 
 {"AFG", "Asia", "Afghanistan", "2020-08-11", 37260., 107., 69.571, 1346., 
  17., 8., 957.143, 2.749, 1.787, 34.576, 0.437, 0.206, 0.88, "", "", "", "", 
  "", "", "", "", "", "", "", "", "", "", "", "", "", "", "", "", "", "", "", 
  "", "", "", 71.3, 3.8928341*^7, 54.422, 18.6, 2.581, 1.337, 1803.987, "", 
  597.029, 9.59, "", "", 37.746, 0.5, 64.83, 0.511}, 
 {"AFG", "Asia", "Afghanistan", "2020-08-12", 37336., 76., 73.714, 1356., 
  10., 8.571, 959.096, 1.952, 1.894, 34.833, 0.257, 0.22, 0.88, "", "", "", 
  "", "", "", "", "", "", "", "", "", "", "", "", "", "", "", "", "", "", "", 
  "", "", "", "", 71.3, 3.8928341*^7, 54.422, 18.6, 2.581, 1.337, 1803.987, 
  "", 597.029, 9.59, "", "", 37.746, 0.5, 64.83, 0.511}, 
 {"AFG", "Asia", "Afghanistan", "2020-08-13", 37422., 86., 70.571, 1365., 9., 
  9.143, 961.305, 2.209, 1.813, 35.064, 0.231, 0.235, 0.88, "", "", "", "", 
  "", "", "", "", "", "", "", "", "", "", "", "", "", "", "", "", "", "", "", 
  "", "", "", 71.3, 3.8928341*^7, 54.422, 18.6, 2.581, 1.337, 1803.987, "", 
  597.029, 9.59, "", "", 37.746, 0.5, 64.83, 0.511}, 
 {"AFG", "Asia", "Afghanistan", "2020-08-14", 37497., 75., 70.143, 1370., 5., 
  8.571, 963.231, 1.927, 1.802, 35.193, 0.128, 0.22, 0.87, "", "", "", "", 
  "", "", "", "", "", "", "", "", "", "", "", "", "", "", "", "", "", "", "", 
  "", "", "", 71.3, 3.8928341*^7, 54.422, 18.6, 2.581, 1.337, 1803.987, "", 
  597.029, 9.59, "", "", 37.746, 0.5, 64.83, 0.511}, 
 {"AFG", "Asia", "Afghanistan", "2020-08-15", 37542., 45., 70.857, 1371., 1., 
  8., 964.387, 1.156, 1.82, 35.219, 0.026, 0.206, 0.86, "", "", "", "", "", 
  "", "", "", "", "", "", "", "", "", "", "", "", "", "", "", "", "", "", "", 
  "", "", 60.19, 3.8928341*^7, 54.422, 18.6, 2.581, 1.337, 1803.987, "", 
  597.029, 9.59, "", "", 37.746, 0.5, 64.83, 0.511}, 
 {"AFG", "Asia", "Afghanistan", "2020-08-16", 37590., 48., 72.429, 1376., 5., 
  7.857, 965.62, 1.233, 1.861, 35.347, 0.128, 0.202, 0.85, "", "", "", "", 
  "", "", "", "", "", "", "", "", "", "", "", "", "", "", "", "", "", "", "", 
  "", "", "", 60.19, 3.8928341*^7, 54.422, 18.6, 2.581, 1.337, 1803.987, "", 
  597.029, 9.59, "", "", 37.746, 0.5, 64.83, 0.511}, 
 {"AFG", "Asia", "Afghanistan", "2020-08-17", 37667., 77., 73.429, 1378., 2., 
  7., 967.598, 1.978, 1.886, 35.398, 0.051, 0.18, 0.84, "", "", "", "", "", 
  "", "", "", "", "", "", "", "", "", "", "", "", "", "", "", "", "", "", "", 
  "", "", 60.19, 3.8928341*^7, 54.422, 18.6, 2.581, 1.337, 1803.987, "", 
  597.029, 9.59, "", "", 37.746, 0.5, 64.83, 0.511}, 
 {"AFG", "Asia", "Afghanistan", "2020-08-18", 37710., 43., 64.286, 1382., 4., 
  5.143, 968.703, 1.105, 1.651, 35.501, 0.103, 0.132, 0.84, "", "", "", "", 
  "", "", "", "", "", "", "", "", "", "", "", "", "", "", "", "", "", "", "", 
  "", "", "", 48.15, 3.8928341*^7, 54.422, 18.6, 2.581, 1.337, 1803.987, "", 
  597.029, 9.59, "", "", 37.746, 0.5, 64.83, 0.511}, 
 {"AFG", "Asia", "Afghanistan", "2020-08-19", 37750., 40., 59.143, 1384., 2., 
  4., 969.731, 1.028, 1.519, 35.553, 0.051, 0.103, 0.83, "", "", "", "", "", 
  "", "", "", "", "", "", "", "", "", "", "", "", "", "", "", "", "", "", "", 
  "", "", 48.15, 3.8928341*^7, 54.422, 18.6, 2.581, 1.337, 1803.987, "", 
  597.029, 9.59, "", "", 37.746, 0.5, 64.83, 0.511}, 
 {"AFG", "Asia", "Afghanistan", "2020-08-20", 37852., 102., 61.429, 1386., 
  2., 3., 972.351, 2.62, 1.578, 35.604, 0.051, 0.077, 0.83, "", "", "", "", 
  "", "", "", "", "", "", "", "", "", "", "", "", "", "", "", "", "", "", "", 
  "", "", "", 48.15, 3.8928341*^7, 54.422, 18.6, 2.581, 1.337, 1803.987, "", 
  597.029, 9.59, "", "", 37.746, 0.5, 64.83, 0.511}, 
 {"AFG", "Asia", "Afghanistan", "2020-08-21", 37885., 33., 55.429, 1386., 0., 
  2.286, 973.198, 0.848, 1.424, 35.604, 0., 0.059, 0.82, "", "", "", "", "", 
  "", "", "", "", "", "", "", "", "", "", "", "", "", "", "", "", "", "", "", 
  "", "", 48.15, 3.8928341*^7, 54.422, 18.6, 2.581, 1.337, 1803.987, "", 
  597.029, 9.59, "", "", 37.746, 0.5, 64.83, 0.511}, 
 {"AFG", "Asia", "Afghanistan", "2020-08-22", 37944., 59., 57.429, 1386., 0., 
  2.143, 974.714, 1.516, 1.475, 35.604, 0., 0.055, 0.81, "", "", "", "", "", 
  "", "", "", "", "", "", "", "", "", "", "", "", "", "", "", "", "", "", "", 
  "", "", 48.15, 3.8928341*^7, 54.422, 18.6, 2.581, 1.337, 1803.987, "", 
  597.029, 9.59, "", "", 37.746, 0.5, 64.83, 0.511}, 
 {"AFG", "Asia", "Afghanistan", "2020-08-23", 37990., 46., 57.143, 1388., 2., 
  1.714, 975.896, 1.182, 1.468, 35.655, 0.051, 0.044, 0.79, "", "", "", "", 
  "", "", "", "", "", "", "", "", "", "", "", "", "", "", "", "", "", "", "", 
  "", "", "", 48.15, 3.8928341*^7, 54.422, 18.6, 2.581, 1.337, 1803.987, "", 
  597.029, 9.59, "", "", 37.746, 0.5, 64.83, 0.511}, 
 {"AFG", "Asia", "Afghanistan", "2020-08-24", 38045., 55., 54., 1390., 2., 
  1.714, 977.309, 1.413, 1.387, 35.707, 0.051, 0.044, 0.77, "", "", "", "", 
  "", "", "", "", "", "", "", "", "", "", "", "", "", "", "", "", "", "", "", 
  "", "", "", 48.15, 3.8928341*^7, 54.422, 18.6, 2.581, 1.337, 1803.987, "", 
  597.029, 9.59, "", "", 37.746, 0.5, 64.83, 0.511}, 
 {"AFG", "Asia", "Afghanistan", "2020-08-25", 38061., 16., 50.143, 1398., 8., 
  2.286, 977.72, 0.411, 1.288, 35.912, 0.206, 0.059, 0.76, "", "", "", "", 
  "", "", "", "", "", "", "", "", "", "", "", "", "", "", "", "", "", "", "", 
  "", "", "", 48.15, 3.8928341*^7, 54.422, 18.6, 2.581, 1.337, 1803.987, "", 
  597.029, 9.59, "", "", 37.746, 0.5, 64.83, 0.511}, 
 {"AFG", "Asia", "Afghanistan", "2020-08-26", 38103., 42., 50.429, 1402., 4., 
  2.571, 978.798, 1.079, 1.295, 36.015, 0.103, 0.066, 0.75, "", "", "", "", 
  "", "", "", "", "", "", "", "", "", "", "", "", "", "", "", "", "", "", "", 
  "", "", "", 21.3, 3.8928341*^7, 54.422, 18.6, 2.581, 1.337, 1803.987, "", 
  597.029, 9.59, "", "", 37.746, 0.5, 64.83, 0.511}, 
 {"AFG", "Asia", "Afghanistan", "2020-08-27", 38119., 16., 38.143, 1402., 0., 
  2.286, 979.209, 0.411, 0.98, 36.015, 0., 0.059, 0.75, "", "", "", "", "", 
  "", "", "", "", "", "", "", "", "", "", "", "", "", "", "", "", "", "", "", 
  "", "", 21.3, 3.8928341*^7, 54.422, 18.6, 2.581, 1.337, 1803.987, "", 
  597.029, 9.59, "", "", 37.746, 0.5, 64.83, 0.511}, 
 {"AFG", "Asia", "Afghanistan", "2020-08-28", 38130., 11., 35., 1403., 1., 
  2.429, 979.492, 0.283, 0.899, 36.041, 0.026, 0.062, 0.76, "", "", "", "", 
  "", "", "", "", "", "", "", "", "", "", "", "", "", "", "", "", "", "", "", 
  "", "", "", 21.3, 3.8928341*^7, 54.422, 18.6, 2.581, 1.337, 1803.987, "", 
  597.029, 9.59, "", "", 37.746, 0.5, 64.83, 0.511}, 
 {"AFG", "Asia", "Afghanistan", "2020-08-29", 38133., 3., 27., 1403., 0., 
  2.429, 979.569, 0.077, 0.694, 36.041, 0., 0.062, 0.77, "", "", "", "", "", 
  "", "", "", "", "", "", "", "", "", "", "", "", "", "", "", "", "", "", "", 
  "", "", 21.3, 3.8928341*^7, 54.422, 18.6, 2.581, 1.337, 1803.987, "", 
  597.029, 9.59, "", "", 37.746, 0.5, 64.83, 0.511}, 
 {"AFG", "Asia", "Afghanistan", "2020-08-30", 38155., 22., 23.571, 1403., 0., 
  2.143, 980.134, 0.565, 0.606, 36.041, 0., 0.055, 0.8, "", "", "", "", "", 
  "", "", "", "", "", "", "", "", "", "", "", "", "", "", "", "", "", "", "", 
  "", "", 21.3, 3.8928341*^7, 54.422, 18.6, 2.581, 1.337, 1803.987, "", 
  597.029, 9.59, "", "", 37.746, 0.5, 64.83, 0.511}, 
 {"AFG", "Asia", "Afghanistan", "2020-08-31", 38159., 4., 16.286, 1403., 0., 
  1.857, 980.237, 0.103, 0.418, 36.041, 0., 0.048, 0.83, "", "", "", "", "", 
  "", "", "", "", "", "", "", "", "", "", "", "", "", "", "", "", "", "", "", 
  "", "", 21.3, 3.8928341*^7, 54.422, 18.6, 2.581, 1.337, 1803.987, "", 
  597.029, 9.59, "", "", 37.746, 0.5, 64.83, 0.511}, 
 {"AFG", "Asia", "Afghanistan", "2020-09-01", 38193., 34., 18.857, 1407., 4., 
  1.286, 981.11, 0.873, 0.484, 36.143, 0.103, 0.033, 0.89, "", "", "", "", 
  "", "", "", "", "", "", "", "", "", "", "", "", "", "", "", "", "", "", "", 
  "", "", "", 21.3, 3.8928341*^7, 54.422, 18.6, 2.581, 1.337, 1803.987, "", 
  597.029, 9.59, "", "", 37.746, 0.5, 64.83, 0.511}, 
 {"AFG", "Asia", "Afghanistan", "2020-09-02", 38243., 50., 20., 1410., 3., 
  1.143, 982.395, 1.284, 0.514, 36.22, 0.077, 0.029, 0.94, "", "", "", "", 
  "", "", "", "", "", "", "", "", "", "", "", "", "", "", "", "", "", "", "", 
  "", "", "", 21.3, 3.8928341*^7, 54.422, 18.6, 2.581, 1.337, 1803.987, "", 
  597.029, 9.59, "", "", 37.746, 0.5, 64.83, 0.511}, 
 {"AFG", "Asia", "Afghanistan", "2020-09-03", 38288., 45., 24.143, 1410., 0., 
  1.143, 983.551, 1.156, 0.62, 36.22, 0., 0.029, 0.97, "", "", "", "", "", 
  "", "", "", "", "", "", "", "", "", "", "", "", "", "", "", "", "", "", "", 
  "", "", 21.3, 3.8928341*^7, 54.422, 18.6, 2.581, 1.337, 1803.987, "", 
  597.029, 9.59, "", "", 37.746, 0.5, 64.83, 0.511}, 
 {"AFG", "Asia", "Afghanistan", "2020-09-04", 38304., 16., 24.857, 1410., 0., 
  1., 983.962, 0.411, 0.639, 36.22, 0., 0.026, 1., "", "", "", "", "", "", 
  "", "", "", "", "", "", "", "", "", "", "", "", "", "", "", "", "", "", "", 
  "", 21.3, 3.8928341*^7, 54.422, 18.6, 2.581, 1.337, 1803.987, "", 597.029, 
  9.59, "", "", 37.746, 0.5, 64.83, 0.511}, {"AFG", "Asia", "Afghanistan", 
  "2020-09-05", 38324., 20., 27.286, 1410., 0., 1., 984.476, 0.514, 0.701, 
  36.22, 0., 0.026, 1.03, "", "", "", "", "", "", "", "", "", "", "", "", "", 
  "", "", "", "", "", "", "", "", "", "", "", "", "", 21.3, 3.8928341*^7, 
  54.422, 18.6, 2.581, 1.337, 1803.987, "", 597.029, 9.59, "", "", 37.746, 
  0.5, 64.83, 0.511}, {"AFG", "Asia", "Afghanistan", "2020-09-06", 38398., 
  74., 34.714, 1413., 3., 1.429, 986.376, 1.901, 0.892, 36.297, 0.077, 0.037, 
  1.06, "", "", "", "", "", "", "", "", "", "", "", "", "", "", "", "", "", 
  "", "", "", "", "", "", "", "", "", 21.3, 3.8928341*^7, 54.422, 18.6, 
  2.581, 1.337, 1803.987, "", 597.029, 9.59, "", "", 37.746, 0.5, 64.83, 
  0.511}, {"AFG", "Asia", "Afghanistan", "2020-09-07", 38494., 96., 47.857, 
  1416., 3., 1.857, 988.843, 2.466, 1.229, 36.375, 0.077, 0.048, 1.07, "", 
  "", "", "", "", "", "", "", "", "", "", "", "", "", "", "", "", "", "", "", 
  "", "", "", "", "", "", 21.3, 3.8928341*^7, 54.422, 18.6, 2.581, 1.337, 
  1803.987, "", 597.029, 9.59, "", "", 37.746, 0.5, 64.83, 0.511}, 
 {"AFG", "Asia", "Afghanistan", "2020-09-08", 38520., 26., 46.714, 1419., 3., 
  1.714, 989.51, 0.668, 1.2, 36.452, 0.077, 0.044, 1.05, "", "", "", "", "", 
  "", "", "", "", "", "", "", "", "", "", "", "", "", "", "", "", "", "", "", 
  "", "", 21.3, 3.8928341*^7, 54.422, 18.6, 2.581, 1.337, 1803.987, "", 
  597.029, 9.59, "", "", 37.746, 0.5, 64.83, 0.511}, 
 {"AFG", "Asia", "Afghanistan", "2020-09-09", 38544., 24., 43., 1421., 2., 
  1.571, 990.127, 0.617, 1.105, 36.503, 0.051, 0.04, 1.04, "", "", "", "", 
  "", "", "", "", "", "", "", "", "", "", "", "", "", "", "", "", "", "", "", 
  "", "", "", 21.3, 3.8928341*^7, 54.422, 18.6, 2.581, 1.337, 1803.987, "", 
  597.029, 9.59, "", "", 37.746, 0.5, 64.83, 0.511}, 
 {"AFG", "Asia", "Afghanistan", "2020-09-10", 38572., 28., 40.571, 1421., 0., 
  1.571, 990.846, 0.719, 1.042, 36.503, 0., 0.04, 1.04, "", "", "", "", "", 
  "", "", "", "", "", "", "", "", "", "", "", "", "", "", "", "", "", "", "", 
  "", "", 21.3, 3.8928341*^7, 54.422, 18.6, 2.581, 1.337, 1803.987, "", 
  597.029, 9.59, "", "", 37.746, 0.5, 64.83, 0.511}, 
 {"AFG", "Asia", "Afghanistan", "2020-09-11", 38606., 34., 43.143, 1421., 0., 
  1.571, 991.72, 0.873, 1.108, 36.503, 0., 0.04, 1.05, "", "", "", "", "", 
  "", "", "", "", "", "", "", "", "", "", "", "", "", "", "", "", "", "", "", 
  "", "", 21.3, 3.8928341*^7, 54.422, 18.6, 2.581, 1.337, 1803.987, "", 
  597.029, 9.59, "", "", 37.746, 0.5, 64.83, 0.511}, 
 {"AFG", "Asia", "Afghanistan", "2020-09-12", 38641., 35., 45.286, 1421., 0., 
  1.571, 992.619, 0.899, 1.163, 36.503, 0., 0.04, 1.05, "", "", "", "", "", 
  "", "", "", "", "", "", "", "", "", "", "", "", "", "", "", "", "", "", "", 
  "", "", 21.3, 3.8928341*^7, 54.422, 18.6, 2.581, 1.337, 1803.987, "", 
  597.029, 9.59, "", "", 37.746, 0.5, 64.83, 0.511}, 
 {"AFG", "Asia", "Afghanistan", "2020-09-13", 38716., 75., 45.429, 1421., 0., 
  1.143, 994.545, 1.927, 1.167, 36.503, 0., 0.029, 1.05, "", "", "", "", "", 
  "", "", "", "", "", "", "", "", "", "", "", "", "", "", "", "", "", "", "", 
  "", "", 21.3, 3.8928341*^7, 54.422, 18.6, 2.581, 1.337, 1803.987, "", 
  597.029, 9.59, "", "", 37.746, 0.5, 64.83, 0.511}, 
 {"AFG", "Asia", "Afghanistan", "2020-09-14", 38772., 56., 39.714, 1427., 6., 
  1.571, 995.984, 1.439, 1.02, 36.657, 0.154, 0.04, 1.04, "", "", "", "", "", 
  "", "", "", "", "", "", "", "", "", "", "", "", "", "", "", "", "", "", "", 
  "", "", 21.3, 3.8928341*^7, 54.422, 18.6, 2.581, 1.337, 1803.987, "", 
  597.029, 9.59, "", "", 37.746, 0.5, 64.83, 0.511}, 
 {"AFG", "Asia", "Afghanistan", "2020-09-15", 38815., 43., 42.143, 1428., 1., 
  1.286, 997.088, 1.105, 1.083, 36.683, 0.026, 0.033, 1.03, "", "", "", "", 
  "", "", "", "", "", "", "", "", "", "", "", "", "", "", "", "", "", "", "", 
  "", "", "", 21.3, 3.8928341*^7, 54.422, 18.6, 2.581, 1.337, 1803.987, "", 
  597.029, 9.59, "", "", 37.746, 0.5, 64.83, 0.511}, 
 {"AFG", "Asia", "Afghanistan", "2020-09-16", 38855., 40., 44.429, 1438., 
  10., 2.429, 998.116, 1.028, 1.141, 36.94, 0.257, 0.062, 1.02, "", "", "", 
  "", "", "", "", "", "", "", "", "", "", "", "", "", "", "", "", "", "", "", 
  "", "", "", "", 21.3, 3.8928341*^7, 54.422, 18.6, 2.581, 1.337, 1803.987, 
  "", 597.029, 9.59, "", "", 37.746, 0.5, 64.83, 0.511}, 
 {"AFG", "Asia", "Afghanistan", "2020-09-17", 38872., 17., 42.857, 1438., 0., 
  2.429, 998.553, 0.437, 1.101, 36.94, 0., 0.062, 1.01, "", "", "", "", "", 
  "", "", "", "", "", "", "", "", "", "", "", "", "", "", "", "", "", "", "", 
  "", "", 21.3, 3.8928341*^7, 54.422, 18.6, 2.581, 1.337, 1803.987, "", 
  597.029, 9.59, "", "", 37.746, 0.5, 64.83, 0.511}, 
 {"AFG", "Asia", "Afghanistan", "2020-09-18", 38897., 25., 41.571, 1439., 1., 
  2.571, 999.195, 0.642, 1.068, 36.965, 0.026, 0.066, 1.01, "", "", "", "", 
  "", "", "", "", "", "", "", "", "", "", "", "", "", "", "", "", "", "", "", 
  "", "", "", 21.3, 3.8928341*^7, 54.422, 18.6, 2.581, 1.337, 1803.987, "", 
  597.029, 9.59, "", "", 37.746, 0.5, 64.83, 0.511}, 
 {"AFG", "Asia", "Afghanistan", "2020-09-19", 38919., 22., 39.714, 1439., 0., 
  2.571, 999.76, 0.565, 1.02, 36.965, 0., 0.066, 1.02, "", "", "", "", "", 
  "", "", "", "", "", "", "", "", "", "", "", "", "", "", "", "", "", "", "", 
  "", "", 21.3, 3.8928341*^7, 54.422, 18.6, 2.581, 1.337, 1803.987, "", 
  597.029, 9.59, "", "", 37.746, 0.5, 64.83, 0.511}, 
 {"AFG", "Asia", "Afghanistan", "2020-09-20", 39044., 125., 46.857, 1443., 
  4., 3.143, 1002.971, 3.211, 1.204, 37.068, 0.103, 0.081, 1.03, "", "", "", 
  "", "", "", "", "", "", "", "", "", "", "", "", "", "", "", "", "", "", "", 
  "", "", "", "", 21.3, 3.8928341*^7, 54.422, 18.6, 2.581, 1.337, 1803.987, 
  "", 597.029, 9.59, "", "", 37.746, 0.5, 64.83, 0.511}, 
 {"AFG", "Asia", "Afghanistan", "2020-09-21", 39074., 30., 43.143, 1446., 3., 
  2.714, 1003.742, 0.771, 1.108, 37.145, 0.077, 0.07, 0.99, "", "", "", "", 
  "", "", "", "", "", "", "", "", "", "", "", "", "", "", "", "", "", "", "", 
  "", "", "", 21.3, 3.8928341*^7, 54.422, 18.6, 2.581, 1.337, 1803.987, "", 
  597.029, 9.59, "", "", 37.746, 0.5, 64.83, 0.511}, 
 {"AFG", "Asia", "Afghanistan", "2020-09-22", 39096., 22., 40.143, 1447., 1., 
  2.714, 1004.307, 0.565, 1.031, 37.171, 0.026, 0.07, 0.96, "", "", "", "", 
  "", "", "", "", "", "", "", "", "", "", "", "", "", "", "", "", "", "", "", 
  "", "", "", 28.7, 3.8928341*^7, 54.422, 18.6, 2.581, 1.337, 1803.987, "", 
  597.029, 9.59, "", "", 37.746, 0.5, 64.83, 0.511}, 
 {"AFG", "Asia", "Afghanistan", "2020-09-23", 39145., 49., 41.429, 1448., 1., 
  1.429, 1005.566, 1.259, 1.064, 37.197, 0.026, 0.037, 0.95, "", "", "", "", 
  "", "", "", "", "", "", "", "", "", "", "", "", "", "", "", "", "", "", "", 
  "", "", "", 28.7, 3.8928341*^7, 54.422, 18.6, 2.581, 1.337, 1803.987, "", 
  597.029, 9.59, "", "", 37.746, 0.5, 64.83, 0.511}, 
 {"AFG", "Asia", "Afghanistan", "2020-09-24", 39170., 25., 42.571, 1453., 5., 
  2.143, 1006.208, 0.642, 1.094, 37.325, 0.128, 0.055, 0.93, "", "", "", "", 
  "", "", "", "", "", "", "", "", "", "", "", "", "", "", "", "", "", "", "", 
  "", "", "", 28.7, 3.8928341*^7, 54.422, 18.6, 2.581, 1.337, 1803.987, "", 
  597.029, 9.59, "", "", 37.746, 0.5, 64.83, 0.511}, 
 {"AFG", "Asia", "Afghanistan", "2020-09-25", 39186., 16., 41.286, 1453., 0., 
  2., 1006.619, 0.411, 1.061, 37.325, 0., 0.051, 0.92, "", "", "", "", "", 
  "", "", "", "", "", "", "", "", "", "", "", "", "", "", "", "", "", "", "", 
  "", "", 28.7, 3.8928341*^7, 54.422, 18.6, 2.581, 1.337, 1803.987, "", 
  597.029, 9.59, "", "", 37.746, 0.5, 64.83, 0.511}, 
 {"AFG", "Asia", "Afghanistan", "2020-09-26", 39192., 6., 39., 1455., 2., 
  2.286, 1006.773, 0.154, 1.002, 37.376, 0.051, 0.059, 0.91, "", "", "", "", 
  "", "", "", "", "", "", "", "", "", "", "", "", "", "", "", "", "", "", "", 
  "", "", "", 28.7, 3.8928341*^7, 54.422, 18.6, 2.581, 1.337, 1803.987, "", 
  597.029, 9.59, "", "", 37.746, 0.5, 64.83, 0.511}, 
 {"AFG", "Asia", "Afghanistan", "2020-09-27", 39227., 35., 26.143, 1455., 0., 
  1.714, 1007.672, 0.899, 0.672, 37.376, 0., 0.044, 0.91, "", "", "", "", "", 
  "", "", "", "", "", "", "", "", "", "", "", "", "", "", "", "", "", "", "", 
  "", "", 28.7, 3.8928341*^7, 54.422, 18.6, 2.581, 1.337, 1803.987, "", 
  597.029, 9.59, "", "", 37.746, 0.5, 64.83, 0.511}, 
 {"AFG", "Asia", "Afghanistan", "2020-09-28", 39239., 12., 23.571, 1458., 3., 
  1.714, 1007.98, 0.308, 0.606, 37.453, 0.077, 0.044, 0.92, "", "", "", "", 
  "", "", "", "", "", "", "", "", "", "", "", "", "", "", "", "", "", "", "", 
  "", "", "", 28.7, 3.8928341*^7, 54.422, 18.6, 2.581, 1.337, 1803.987, "", 
  597.029, 9.59, "", "", 37.746, 0.5, 64.83, 0.511}, 
 {"AFG", "Asia", "Afghanistan", "2020-09-29", 39254., 15., 22.571, 1460., 2., 
  1.857, 1008.366, 0.385, 0.58, 37.505, 0.051, 0.048, 0.95, "", "", "", "", 
  "", "", "", "", "", "", "", "", "", "", "", "", "", "", "", "", "", "", "", 
  "", "", "", 28.7, 3.8928341*^7, 54.422, 18.6, 2.581, 1.337, 1803.987, "", 
  597.029, 9.59, "", "", 37.746, 0.5, 64.83, 0.511}, 
 {"AFG", "Asia", "Afghanistan", "2020-09-30", 39268., 14., 17.571, 1460., 0., 
  1.714, 1008.725, 0.36, 0.451, 37.505, 0., 0.044, 0.98, "", "", "", "", "", 
  "", "", "", "", "", "", "", "", "", "", "", "", "", "", "", "", "", "", "", 
  "", "", 28.7, 3.8928341*^7, 54.422, 18.6, 2.581, 1.337, 1803.987, "", 
  597.029, 9.59, "", "", 37.746, 0.5, 64.83, 0.511}, 
 {"AFG", "Asia", "Afghanistan", "2020-10-01", 39285., 17., 16.429, 1460., 0., 
  1., 1009.162, 0.437, 0.422, 37.505, 0., 0.026, 1.03, "", "", "", "", "", 
  "", "", "", "", "", "", "", "", "", "", "", "", "", "", "", "", "", "", "", 
  "", "", 28.7, 3.8928341*^7, 54.422, 18.6, 2.581, 1.337, 1803.987, "", 
  597.029, 9.59, "", "", 37.746, 0.5, 64.83, 0.511}, 
 {"AFG", "Asia", "Afghanistan", "2020-10-02", 39290., 5., 14.857, 1460., 0., 
  1., 1009.29, 0.128, 0.382, 37.505, 0., 0.026, 1.09, "", "", "", "", "", "", 
  "", "", "", "", "", "", "", "", "", "", "", "", "", "", "", "", "", "", "", 
  "", 28.7, 3.8928341*^7, 54.422, 18.6, 2.581, 1.337, 1803.987, "", 597.029, 
  9.59, "", "", 37.746, 0.5, 64.83, 0.511}, {"AFG", "Asia", "Afghanistan", 
  "2020-10-03", 39297., 7., 15., 1464., 4., 1.286, 1009.47, 0.18, 0.385, 
  37.608, 0.103, 0.033, 1.17, "", "", "", "", "", "", "", "", "", "", "", "", 
  "", "", "", "", "", "", "", "", "", "", "", "", "", "", 25., 3.8928341*^7, 
  54.422, 18.6, 2.581, 1.337, 1803.987, "", 597.029, 9.59, "", "", 37.746, 
  0.5, 64.83, 0.511}, {"AFG", "Asia", "Afghanistan", "2020-10-04", 39341., 
  44., 16.286, 1464., 0., 1.286, 1010.6, 1.13, 0.418, 37.608, 0., 0.033, 
  1.25, "", "", "", "", "", "", "", "", "", "", "", "", "", "", "", "", "", 
  "", "", "", "", "", "", "", "", "", 25., 3.8928341*^7, 54.422, 18.6, 2.581, 
  1.337, 1803.987, "", 597.029, 9.59, "", "", 37.746, 0.5, 64.83, 0.511}, 
 {"AFG", "Asia", "Afghanistan", "2020-10-05", 39422., 81., 26.143, 1468., 4., 
  1.429, 1012.681, 2.081, 0.672, 37.71, 0.103, 0.037, 1.32, "", "", "", "", 
  "", "", "", "", "", "", "", "", "", "", "", "", "", "", "", "", "", "", "", 
  "", "", "", 25., 3.8928341*^7, 54.422, 18.6, 2.581, 1.337, 1803.987, "", 
  597.029, 9.59, "", "", 37.746, 0.5, 64.83, 0.511}, 
 {"AFG", "Asia", "Afghanistan", "2020-10-06", 39486., 64., 33.143, 1469., 1., 
  1.286, 1014.325, 1.644, 0.851, 37.736, 0.026, 0.033, 1.35, "", "", "", "", 
  "", "", "", "", "", "", "", "", "", "", "", "", "", "", "", "", "", "", "", 
  "", "", "", 16.67, 3.8928341*^7, 54.422, 18.6, 2.581, 1.337, 1803.987, "", 
  597.029, 9.59, "", "", 37.746, 0.5, 64.83, 0.511}, 
 {"AFG", "Asia", "Afghanistan", "2020-10-07", 39548., 62., 40., 1471., 2., 
  1.571, 1015.918, 1.593, 1.028, 37.787, 0.051, 0.04, 1.35, "", "", "", "", 
  "", "", "", "", "", "", "", "", "", "", "", "", "", "", "", "", "", "", "", 
  "", "", "", 16.67, 3.8928341*^7, 54.422, 18.6, 2.581, 1.337, 1803.987, "", 
  597.029, 9.59, "", "", 37.746, 0.5, 64.83, 0.511}, 
 {"AFG", "Asia", "Afghanistan", "2020-10-08", 39616., 68., 47.286, 1472., 1., 
  1.714, 1017.665, 1.747, 1.215, 37.813, 0.026, 0.044, 1.35, "", "", "", "", 
  "", "", "", "", "", "", "", "", "", "", "", "", "", "", "", "", "", "", "", 
  "", "", "", 16.67, 3.8928341*^7, 54.422, 18.6, 2.581, 1.337, 1803.987, "", 
  597.029, 9.59, "", "", 37.746, 0.5, 64.83, 0.511}, 
 {"AFG", "Asia", "Afghanistan", "2020-10-09", 39693., 77., 57.571, 1474., 2., 
  2., 1019.643, 1.978, 1.479, 37.864, 0.051, 0.051, 1.34, "", "", "", "", "", 
  "", "", "", "", "", "", "", "", "", "", "", "", "", "", "", "", "", "", "", 
  "", "", 16.67, 3.8928341*^7, 54.422, 18.6, 2.581, 1.337, 1803.987, "", 
  597.029, 9.59, "", "", 37.746, 0.5, 64.83, 0.511}, 
 {"AFG", "Asia", "Afghanistan", "2020-10-10", 39703., 10., 58., 1475., 1., 
  1.571, 1019.9, 0.257, 1.49, 37.89, 0.026, 0.04, 1.32, "", "", "", "", "", 
  "", "", "", "", "", "", "", "", "", "", "", "", "", "", "", "", "", "", "", 
  "", "", 16.67, 3.8928341*^7, 54.422, 18.6, 2.581, 1.337, 1803.987, "", 
  597.029, 9.59, "", "", 37.746, 0.5, 64.83, 0.511}, 
 {"AFG", "Asia", "Afghanistan", "2020-10-11", 39799., 96., 65.429, 1479., 4., 
  2.143, 1022.366, 2.466, 1.681, 37.993, 0.103, 0.055, 1.31, "", "", "", "", 
  "", "", "", "", "", "", "", "", "", "", "", "", "", "", "", "", "", "", "", 
  "", "", "", 16.67, 3.8928341*^7, 54.422, 18.6, 2.581, 1.337, 1803.987, "", 
  597.029, 9.59, "", "", 37.746, 0.5, 64.83, 0.511}, 
 {"AFG", "Asia", "Afghanistan", "2020-10-12", 39870., 71., 64., 1481., 2., 
  1.857, 1024.19, 1.824, 1.644, 38.044, 0.051, 0.048, 1.29, "", "", "", "", 
  "", "", "", "", "", "", "", "", "", "", "", "", "", "", "", "", "", "", "", 
  "", "", "", 16.67, 3.8928341*^7, 54.422, 18.6, 2.581, 1.337, 1803.987, "", 
  597.029, 9.59, "", "", 37.746, 0.5, 64.83, 0.511}, 
 {"AFG", "Asia", "Afghanistan", "2020-10-13", 39928., 58., 63.143, 1482., 1., 
  1.857, 1025.679, 1.49, 1.622, 38.07, 0.026, 0.048, 1.27, "", "", "", "", 
  "", "", "", "", "", "", "", "", "", "", "", "", "", "", "", "", "", "", "", 
  "", "", "", 16.67, 3.8928341*^7, 54.422, 18.6, 2.581, 1.337, 1803.987, "", 
  597.029, 9.59, "", "", 37.746, 0.5, 64.83, 0.511}, 
 {"AFG", "Asia", "Afghanistan", "2020-10-14", 39994., 66., 63.714, 1483., 1., 
  1.714, 1027.375, 1.695, 1.637, 38.096, 0.026, 0.044, 1.26, "", "", "", "", 
  "", "", "", "", "", "", "", "", "", "", "", "", "", "", "", "", "", "", "", 
  "", "", "", 16.67, 3.8928341*^7, 54.422, 18.6, 2.581, 1.337, 1803.987, "", 
  597.029, 9.59, "", "", 37.746, 0.5, 64.83, 0.511}, 
 {"AFG", "Asia", "Afghanistan", "2020-10-15", 40026., 32., 58.571, 1483., 0., 
  1.571, 1028.197, 0.822, 1.505, 38.096, 0., 0.04, 1.25, "", "", "", "", "", 
  "", "", "", "", "", "", "", "", "", "", "", "", "", "", "", "", "", "", "", 
  "", "", 16.67, 3.8928341*^7, 54.422, 18.6, 2.581, 1.337, 1803.987, "", 
  597.029, 9.59, "", "", 37.746, 0.5, 64.83, 0.511}, 
 {"AFG", "Asia", "Afghanistan", "2020-10-16", 40088., 62., 56.429, 1487., 4., 
  1.857, 1029.79, 1.593, 1.45, 38.198, 0.103, 0.048, 1.26, "", "", "", "", 
  "", "", "", "", "", "", "", "", "", "", "", "", "", "", "", "", "", "", "", 
  "", "", "", 16.67, 3.8928341*^7, 54.422, 18.6, 2.581, 1.337, 1803.987, "", 
  597.029, 9.59, "", "", 37.746, 0.5, 64.83, 0.511}, 
 {"AFG", "Asia", "Afghanistan", "2020-10-17", 40141., 53., 62.571, 1490., 3., 
  2.143, 1031.151, 1.361, 1.607, 38.275, 0.077, 0.055, 1.26, "", "", "", "", 
  "", "", "", "", "", "", "", "", "", "", "", "", "", "", "", "", "", "", "", 
  "", "", "", 16.67, 3.8928341*^7, 54.422, 18.6, 2.581, 1.337, 1803.987, "", 
  597.029, 9.59, "", "", 37.746, 0.5, 64.83, 0.511}, 
 {"AFG", "Asia", "Afghanistan", "2020-10-18", 40200., 59., 57.286, 1494., 4., 
  2.143, 1032.667, 1.516, 1.472, 38.378, 0.103, 0.055, 1.26, "", "", "", "", 
  "", "", "", "", "", "", "", "", "", "", "", "", "", "", "", "", "", "", "", 
  "", "", "", 16.67, 3.8928341*^7, 54.422, 18.6, 2.581, 1.337, 1803.987, "", 
  597.029, 9.59, "", "", 37.746, 0.5, 64.83, 0.511}, 
 {"AFG", "Asia", "Afghanistan", "2020-10-19", 40287., 87., 59.571, 1499., 5., 
  2.571, 1034.902, 2.235, 1.53, 38.507, 0.128, 0.066, 1.27, "", "", "", "", 
  "", "", "", "", "", "", "", "", "", "", "", "", "", "", "", "", "", "", "", 
  "", "", "", 16.67, 3.8928341*^7, 54.422, 18.6, 2.581, 1.337, 1803.987, "", 
  597.029, 9.59, "", "", 37.746, 0.5, 64.83, 0.511}, 
 {"AFG", "Asia", "Afghanistan", "2020-10-20", 40369., 82., 63., 1501., 2., 
  2.714, 1037.008, 2.106, 1.618, 38.558, 0.051, 0.07, 1.28, "", "", "", "", 
  "", "", "", "", "", "", "", "", "", "", "", "", "", "", "", "", "", "", "", 
  "", "", "", 16.67, 3.8928341*^7, 54.422, 18.6, 2.581, 1.337, 1803.987, "", 
  597.029, 9.59, "", "", 37.746, 0.5, 64.83, 0.511}, 
 {"AFG", "Asia", "Afghanistan", "2020-10-21", 40510., 141., 73.714, 1503., 
  2., 2.857, 1040.63, 3.622, 1.894, 38.609, 0.051, 0.073, 1.28, "", "", "", 
  "", "", "", "", "", "", "", "", "", "", "", "", "", "", "", "", "", "", "", 
  "", "", "", "", 16.67, 3.8928341*^7, 54.422, 18.6, 2.581, 1.337, 1803.987, 
  "", 597.029, 9.59, "", "", 37.746, 0.5, 64.83, 0.511}, 
 {"AFG", "Asia", "Afghanistan", "2020-10-22", 40626., 116., 85.714, 1507., 
  4., 3.429, 1043.61, 2.98, 2.202, 38.712, 0.103, 0.088, 1.27, "", "", "", 
  "", "", "", "", "", "", "", "", "", "", "", "", "", "", "", "", "", "", "", 
  "", "", "", "", 16.67, 3.8928341*^7, 54.422, 18.6, 2.581, 1.337, 1803.987, 
  "", 597.029, 9.59, "", "", 37.746, 0.5, 64.83, 0.511}, 
 {"AFG", "Asia", "Afghanistan", "2020-10-23", 40687., 61., 85.571, 1509., 2., 
  3.143, 1045.177, 1.567, 2.198, 38.764, 0.051, 0.081, 1.25, "", "", "", "", 
  "", "", "", "", "", "", "", "", "", "", "", "", "", "", "", "", "", "", "", 
  "", "", "", 16.67, 3.8928341*^7, 54.422, 18.6, 2.581, 1.337, 1803.987, "", 
  597.029, 9.59, "", "", 37.746, 0.5, 64.83, 0.511}, 
 {"AFG", "Asia", "Afghanistan", "2020-10-24", 40768., 81., 89.571, 1513., 4., 
  3.286, 1047.258, 2.081, 2.301, 38.866, 0.103, 0.084, 1.23, "", "", "", "", 
  "", "", "", "", "", "", "", "", "", "", "", "", "", "", "", "", "", "", "", 
  "", "", "", 16.67, 3.8928341*^7, 54.422, 18.6, 2.581, 1.337, 1803.987, "", 
  597.029, 9.59, "", "", 37.746, 0.5, 64.83, 0.511}, 
 {"AFG", "Asia", "Afghanistan", "2020-10-25", 40833., 65., 90.429, 1516., 3., 
  3.143, 1048.927, 1.67, 2.323, 38.943, 0.077, 0.081, 1.21, "", "", "", "", 
  "", "", "", "", "", "", "", "", "", "", "", "", "", "", "", "", "", "", "", 
  "", "", "", 16.67, 3.8928341*^7, 54.422, 18.6, 2.581, 1.337, 1803.987, "", 
  597.029, 9.59, "", "", 37.746, 0.5, 64.83, 0.511}, 
 {"AFG", "Asia", "Afghanistan", "2020-10-26", 40937., 104., 92.857, 1520., 
  4., 3., 1051.599, 2.672, 2.385, 39.046, 0.103, 0.077, 1.2, "", "", "", "", 
  "", "", "", "", "", "", "", "", "", "", "", "", "", "", "", "", "", "", "", 
  "", "", "", 16.67, 3.8928341*^7, 54.422, 18.6, 2.581, 1.337, 1803.987, "", 
  597.029, 9.59, "", "", 37.746, 0.5, 64.83, 0.511}, 
 {"AFG", "Asia", "Afghanistan", "2020-10-27", 41032., 95., 94.714, 1525., 5., 
  3.429, 1054.039, 2.44, 2.433, 39.175, 0.128, 0.088, 1.2, "", "", "", "", 
  "", "", "", "", "", "", "", "", "", "", "", "", "", "", "", "", "", "", "", 
  "", "", "", 9.26, 3.8928341*^7, 54.422, 18.6, 2.581, 1.337, 1803.987, "", 
  597.029, 9.59, "", "", 37.746, 0.5, 64.83, 0.511}, 
 {"AFG", "Asia", "Afghanistan", "2020-10-28", 41145., 113., 90.714, 1531., 
  6., 4., 1056.942, 2.903, 2.33, 39.329, 0.154, 0.103, 1.19, "", "", "", "", 
  "", "", "", "", "", "", "", "", "", "", "", "", "", "", "", "", "", "", "", 
  "", "", "", 9.26, 3.8928341*^7, 54.422, 18.6, 2.581, 1.337, 1803.987, "", 
  597.029, 9.59, "", "", 37.746, 0.5, 64.83, 0.511}, 
 {"AFG", "Asia", "Afghanistan", "2020-10-29", 41268., 123., 91.714, 1534., 
  3., 3.857, 1060.102, 3.16, 2.356, 39.406, 0.077, 0.099, 1.19, "", "", "", 
  "", "", "", "", "", "", "", "", "", "", "", "", "", "", "", "", "", "", "", 
  "", "", "", "", 9.26, 3.8928341*^7, 54.422, 18.6, 2.581, 1.337, 1803.987, 
  "", 597.029, 9.59, "", "", 37.746, 0.5, 64.83, 0.511}, 
 {"AFG", "Asia", "Afghanistan", "2020-10-30", 41334., 66., 92.429, 1535., 1., 
  3.714, 1061.797, 1.695, 2.374, 39.431, 0.026, 0.095, 1.18, "", "", "", "", 
  "", "", "", "", "", "", "", "", "", "", "", "", "", "", "", "", "", "", "", 
  "", "", "", 9.26, 3.8928341*^7, 54.422, 18.6, 2.581, 1.337, 1803.987, "", 
  597.029, 9.59, "", "", 37.746, 0.5, 64.83, 0.511}, 
 {"AFG", "Asia", "Afghanistan", "2020-10-31", 41425., 91., 93.857, 1538., 3., 
  3.571, 1064.135, 2.338, 2.411, 39.508, 0.077, 0.092, 1.17, "", "", "", "", 
  "", "", "", "", "", "", "", "", "", "", "", "", "", "", "", "", "", "", "", 
  "", "", "", 9.26, 3.8928341*^7, 54.422, 18.6, 2.581, 1.337, 1803.987, "", 
  597.029, 9.59, "", "", 37.746, 0.5, 64.83, 0.511}, 
 {"AFG", "Asia", "Afghanistan", "2020-11-01", 41501., 76., 95.429, 1538., 0., 
  3.143, 1066.087, 1.952, 2.451, 39.508, 0., 0.081, 1.16, "", "", "", "", "", 
  "", "", "", "", "", "", "", "", "", "", "", "", "", "", "", "", "", "", "", 
  "", "", 9.26, 3.8928341*^7, 54.422, 18.6, 2.581, 1.337, 1803.987, "", 
  597.029, 9.59, "", "", 37.746, 0.5, 64.83, 0.511}, 
 {"AFG", "Asia", "Afghanistan", "2020-11-02", 41633., 132., 99.429, 1544., 
  6., 3.429, 1069.478, 3.391, 2.554, 39.663, 0.154, 0.088, 1.16, "", "", "", 
  "", "", "", "", "", "", "", "", "", "", "", "", "", "", "", "", "", "", "", 
  "", "", "", "", 9.26, 3.8928341*^7, 54.422, 18.6, 2.581, 1.337, 1803.987, 
  "", 597.029, 9.59, "", "", 37.746, 0.5, 64.83, 0.511}, 
 {"AFG", "Asia", "Afghanistan", "2020-11-03", 41728., 95., 99.429, 1547., 3., 
  3.143, 1071.918, 2.44, 2.554, 39.74, 0.077, 0.081, 1.15, "", "", "", "", 
  "", "", "", "", "", "", "", "", "", "", "", "", "", "", "", "", "", "", "", 
  "", "", "", 9.26, 3.8928341*^7, 54.422, 18.6, 2.581, 1.337, 1803.987, "", 
  597.029, 9.59, "", "", 37.746, 0.5, 64.83, 0.511}, 
 {"AFG", "Asia", "Afghanistan", "2020-11-04", 41814., 86., 95.571, 1551., 4., 
  2.857, 1074.127, 2.209, 2.455, 39.842, 0.103, 0.073, 1.16, "", "", "", "", 
  "", "", "", "", "", "", "", "", "", "", "", "", "", "", "", "", "", "", "", 
  "", "", "", 9.26, 3.8928341*^7, 54.422, 18.6, 2.581, 1.337, 1803.987, "", 
  597.029, 9.59, "", "", 37.746, 0.5, 64.83, 0.511}, 
 {"AFG", "Asia", "Afghanistan", "2020-11-05", 41935., 121., 95.286, 1557., 
  6., 3.286, 1077.236, 3.108, 2.448, 39.997, 0.154, 0.084, 1.16, "", "", "", 
  "", "", "", "", "", "", "", "", "", "", "", "", "", "", "", "", "", "", "", 
  "", "", "", "", 9.26, 3.8928341*^7, 54.422, 18.6, 2.581, 1.337, 1803.987, 
  "", 597.029, 9.59, "", "", 37.746, 0.5, 64.83, 0.511}, 
 {"AFG", "Asia", "Afghanistan", "2020-11-06", 41975., 40., 91.571, 1557., 0., 
  3.143, 1078.263, 1.028, 2.352, 39.997, 0., 0.081, 1.17, "", "", "", "", "", 
  "", "", "", "", "", "", "", "", "", "", "", "", "", "", "", "", "", "", "", 
  "", "", 9.26, 3.8928341*^7, 54.422, 18.6, 2.581, 1.337, 1803.987, "", 
  597.029, 9.59, "", "", 37.746, 0.5, 64.83, 0.511}, 
 {"AFG", "Asia", "Afghanistan", "2020-11-07", 42033., 58., 86.857, 1559., 2., 
  3., 1079.753, 1.49, 2.231, 40.048, 0.051, 0.077, 1.19, "", "", "", "", "", 
  "", "", "", "", "", "", "", "", "", "", "", "", "", "", "", "", "", "", "", 
  "", "", 9.26, 3.8928341*^7, 54.422, 18.6, 2.581, 1.337, 1803.987, "", 
  597.029, 9.59, "", "", 37.746, 0.5, 64.83, 0.511}, 
 {"AFG", "Asia", "Afghanistan", "2020-11-08", 42159., 126., 94., 1565., 6., 
  3.857, 1082.99, 3.237, 2.415, 40.202, 0.154, 0.099, 1.21, "", "", "", "", 
  "", "", "", "", "", "", "", "", "", "", "", "", "", "", "", "", "", "", "", 
  "", "", "", 9.26, 3.8928341*^7, 54.422, 18.6, 2.581, 1.337, 1803.987, "", 
  597.029, 9.59, "", "", 37.746, 0.5, 64.83, 0.511}, 
 {"AFG", "Asia", "Afghanistan", "2020-11-09", 42297., 138., 94.857, 1577., 
  12., 4.714, 1086.535, 3.545, 2.437, 40.51, 0.308, 0.121, 1.23, "", "", "", 
  "", "", "", "", "", "", "", "", "", "", "", "", "", "", "", "", "", "", "", 
  "", "", "", "", 12.04, 3.8928341*^7, 54.422, 18.6, 2.581, 1.337, 1803.987, 
  "", 597.029, 9.59, "", "", 37.746, 0.5, 64.83, 0.511}, 
 {"AFG", "Asia", "Afghanistan", "2020-11-10", 42463., 166., 105., 1580., 3., 
  4.714, 1090.799, 4.264, 2.697, 40.587, 0.077, 0.121, 1.25, "", "", "", "", 
  "", "", "", "", "", "", "", "", "", "", "", "", "", "", "", "", "", "", "", 
  "", "", "", 12.04, 3.8928341*^7, 54.422, 18.6, 2.581, 1.337, 1803.987, "", 
  597.029, 9.59, "", "", 37.746, 0.5, 64.83, 0.511}, 
 {"AFG", "Asia", "Afghanistan", "2020-11-11", 42609., 146., 113.571, 1584., 
  4., 4.714, 1094.55, 3.75, 2.917, 40.69, 0.103, 0.121, 1.26, "", "", "", "", 
  "", "", "", "", "", "", "", "", "", "", "", "", "", "", "", "", "", "", "", 
  "", "", "", 12.04, 3.8928341*^7, 54.422, 18.6, 2.581, 1.337, 1803.987, "", 
  597.029, 9.59, "", "", 37.746, 0.5, 64.83, 0.511}, 
 {"AFG", "Asia", "Afghanistan", "2020-11-12", 42795., 186., 122.857, 1594., 
  10., 5.286, 1099.328, 4.778, 3.156, 40.947, 0.257, 0.136, 1.27, "", "", "", 
  "", "", "", "", "", "", "", "", "", "", "", "", "", "", "", "", "", "", "", 
  "", "", "", "", 12.04, 3.8928341*^7, 54.422, 18.6, 2.581, 1.337, 1803.987, 
  "", 597.029, 9.59, "", "", 37.746, 0.5, 64.83, 0.511}, 
 {"AFG", "Asia", "Afghanistan", "2020-11-13", 42969., 174., 142., 1598., 4., 
  5.857, 1103.797, 4.47, 3.648, 41.05, 0.103, 0.15, 1.27, "", "", "", "", "", 
  "", "", "", "", "", "", "", "", "", "", "", "", "", "", "", "", "", "", "", 
  "", "", 12.04, 3.8928341*^7, 54.422, 18.6, 2.581, 1.337, 1803.987, "", 
  597.029, 9.59, "", "", 37.746, 0.5, 64.83, 0.511}, 
 {"AFG", "Asia", "Afghanistan", "2020-11-14", 43035., 66., 143.143, 1608., 
  10., 7., 1105.493, 1.695, 3.677, 41.307, 0.257, 0.18, 1.27, "", "", "", "", 
  "", "", "", "", "", "", "", "", "", "", "", "", "", "", "", "", "", "", "", 
  "", "", "", 12.04, 3.8928341*^7, 54.422, 18.6, 2.581, 1.337, 1803.987, "", 
  597.029, 9.59, "", "", 37.746, 0.5, 64.83, 0.511}, 
 {"AFG", "Asia", "Afghanistan", "2020-11-15", 43240., 205., 154.429, 1620., 
  12., 7.857, 1110.759, 5.266, 3.967, 41.615, 0.308, 0.202, 1.27, "", "", "", 
  "", "", "", "", "", "", "", "", "", "", "", "", "", "", "", "", "", "", "", 
  "", "", "", "", 12.04, 3.8928341*^7, 54.422, 18.6, 2.581, 1.337, 1803.987, 
  "", 597.029, 9.59, "", "", 37.746, 0.5, 64.83, 0.511}, 
 {"AFG", "Asia", "Afghanistan", "2020-11-16", 43468., 228., 167.286, 1635., 
  15., 8.286, 1116.616, 5.857, 4.297, 42., 0.385, 0.213, 1.26, "", "", "", 
  "", "", "", "", "", "", "", "", "", "", "", "", "", "", "", "", "", "", "", 
  "", "", "", "", 12.04, 3.8928341*^7, 54.422, 18.6, 2.581, 1.337, 1803.987, 
  "", 597.029, 9.59, "", "", 37.746, 0.5, 64.83, 0.511}, 
 {"AFG", "Asia", "Afghanistan", "2020-11-17", 43681., 213., 174., 1641., 6., 
  8.714, 1122.087, 5.472, 4.47, 42.154, 0.154, 0.224, 1.25, "", "", "", "", 
  "", "", "", "", "", "", "", "", "", "", "", "", "", "", "", "", "", "", "", 
  "", "", "", 12.04, 3.8928341*^7, 54.422, 18.6, 2.581, 1.337, 1803.987, "", 
  597.029, 9.59, "", "", 37.746, 0.5, 64.83, 0.511}, 
 {"AFG", "Asia", "Afghanistan", "2020-11-18", 43924., 243., 187.857, 1648., 
  7., 9.143, 1128.33, 6.242, 4.826, 42.334, 0.18, 0.235, 1.24, "", "", "", 
  "", "", "", "", "", "", "", "", "", "", "", "", "", "", "", "", "", "", "", 
  "", "", "", "", 12.04, 3.8928341*^7, 54.422, 18.6, 2.581, 1.337, 1803.987, 
  "", 597.029, 9.59, "", "", 37.746, 0.5, 64.83, 0.511}, 
 {"AFG", "Asia", "Afghanistan", "2020-11-19", 44177., 253., 197.429, 1653., 
  5., 8.429, 1134.829, 6.499, 5.072, 42.463, 0.128, 0.217, 1.22, "", "", "", 
  "", "", "", "", "", "", "", "", "", "", "", "", "", "", "", "", "", "", "", 
  "", "", "", "", 12.04, 3.8928341*^7, 54.422, 18.6, 2.581, 1.337, 1803.987, 
  "", 597.029, 9.59, "", "", 37.746, 0.5, 64.83, 0.511}, 
 {"AFG", "Asia", "Afghanistan", "2020-11-20", 44363., 186., 199.143, 1666., 
  13., 9.714, 1139.607, 4.778, 5.116, 42.797, 0.334, 0.25, 1.2, "", "", "", 
  "", "", "", "", "", "", "", "", "", "", "", "", "", "", "", "", "", "", "", 
  "", "", "", "", 12.04, 3.8928341*^7, 54.422, 18.6, 2.581, 1.337, 1803.987, 
  "", 597.029, 9.59, "", "", 37.746, 0.5, 64.83, 0.511}, 
 {"AFG", "Asia", "Afghanistan", "2020-11-21", 44503., 140., 209.714, 1678., 
  12., 10., 1143.203, 3.596, 5.387, 43.105, 0.308, 0.257, 1.18, "", "", "", 
  "", "", "", "", "", "", "", "", "", "", "", "", "", "", "", "", "", "", "", 
  "", "", "", "", 12.04, 3.8928341*^7, 54.422, 18.6, 2.581, 1.337, 1803.987, 
  "", 597.029, 9.59, "", "", 37.746, 0.5, 64.83, 0.511}, 
 {"AFG", "Asia", "Afghanistan", "2020-11-22", 44706., 203., 209.429, 1690., 
  12., 10., 1148.418, 5.215, 5.38, 43.413, 0.308, 0.257, 1.15, "", "", "", 
  "", "", "", "", "", "", "", "", "", "", "", "", "", "", "", "", "", "", "", 
  "", "", "", "", 12.04, 3.8928341*^7, 54.422, 18.6, 2.581, 1.337, 1803.987, 
  "", 597.029, 9.59, "", "", 37.746, 0.5, 64.83, 0.511}, 
 {"AFG", "Asia", "Afghanistan", "2020-11-23", 44988., 282., 217.143, 1702., 
  12., 9.571, 1155.662, 7.244, 5.578, 43.721, 0.308, 0.246, 1.14, "", "", "", 
  "", "", "", "", "", "", "", "", "", "", "", "", "", "", "", "", "", "", "", 
  "", "", "", "", 12.04, 3.8928341*^7, 54.422, 18.6, 2.581, 1.337, 1803.987, 
  "", 597.029, 9.59, "", "", 37.746, 0.5, 64.83, 0.511}, 
 {"AFG", "Asia", "Afghanistan", "2020-11-24", 45174., 186., 213.286, 1715., 
  13., 10.571, 1160.44, 4.778, 5.479, 44.055, 0.334, 0.272, 1.11, "", "", "", 
  "", "", "", "", "", "", "", "", "", "", "", "", "", "", "", "", "", "", "", 
  "", "", "", "", 12.04, 3.8928341*^7, 54.422, 18.6, 2.581, 1.337, 1803.987, 
  "", 597.029, 9.59, "", "", 37.746, 0.5, 64.83, 0.511}, 
 {"AFG", "Asia", "Afghanistan", "2020-11-25", 45384., 210., 208.571, 1728., 
  13., 11.429, 1165.834, 5.395, 5.358, 44.389, 0.334, 0.294, 1.09, "", "", 
  "", "", "", "", "", "", "", "", "", "", "", "", "", "", "", "", "", "", "", 
  "", "", "", "", "", 12.04, 3.8928341*^7, 54.422, 18.6, 2.581, 1.337, 
  1803.987, "", 597.029, 9.59, "", "", 37.746, 0.5, 64.83, 0.511}, 
 {"AFG", "Asia", "Afghanistan", "2020-11-26", 45600., 216., 203.286, 1737., 
  9., 12., 1171.383, 5.549, 5.222, 44.62, 0.231, 0.308, 1.08, "", "", "", "", 
  "", "", "", "", "", "", "", "", "", "", "", "", "", "", "", "", "", "", "", 
  "", "", "", 12.04, 3.8928341*^7, 54.422, 18.6, 2.581, 1.337, 1803.987, "", 
  597.029, 9.59, "", "", 37.746, 0.5, 64.83, 0.511}, 
 {"AFG", "Asia", "Afghanistan", "2020-11-27", 45723., 123., 194.286, 1740., 
  3., 10.571, 1174.543, 3.16, 4.991, 44.698, 0.077, 0.272, 1.06, "", "", "", 
  "", "", "", "", "", "", "", "", "", "", "", "", "", "", "", "", "", "", "", 
  "", "", "", "", 12.04, 3.8928341*^7, 54.422, 18.6, 2.581, 1.337, 1803.987, 
  "", 597.029, 9.59, "", "", 37.746, 0.5, 64.83, 0.511}, 
 {"AFG", "Asia", "Afghanistan", "2020-11-28", 45844., 121., 191.571, 1752., 
  12., 10.571, 1177.651, 3.108, 4.921, 45.006, 0.308, 0.272, 1.05, "", "", 
  "", "", "", "", "", "", "", "", "", "", "", "", "", "", "", "", "", "", "", 
  "", "", "", "", "", 12.04, 3.8928341*^7, 54.422, 18.6, 2.581, 1.337, 
  1803.987, "", 597.029, 9.59, "", "", 37.746, 0.5, 64.83, 0.511}, 
 {"AFG", "Asia", "Afghanistan", "2020-11-29", 46116., 272., 201.429, 1774., 
  22., 12., 1184.638, 6.987, 5.174, 45.571, 0.565, 0.308, 1.04, "", "", "", 
  "", "", "", "", "", "", "", "", "", "", "", "", "", "", "", "", "", "", "", 
  "", "", "", "", 12.04, 3.8928341*^7, 54.422, 18.6, 2.581, 1.337, 1803.987, 
  "", 597.029, 9.59, "", "", 37.746, 0.5, 64.83, 0.511}, 
 {"AFG", "Asia", "Afghanistan", "2020-11-30", 46274., 158., 183.714, 1795., 
  21., 13.286, 1188.697, 4.059, 4.719, 46.11, 0.539, 0.341, 1.03, "", "", "", 
  "", "", "", "", "", "", "", "", "", "", "", "", "", "", "", "", "", "", "", 
  "", "", "", "", 12.04, 3.8928341*^7, 54.422, 18.6, 2.581, 1.337, 1803.987, 
  "", 597.029, 9.59, "", "", 37.746, 0.5, 64.83, 0.511}, 
 {"AFG", "Asia", "Afghanistan", "2020-12-01", 46516., 242., 191.714, 1822., 
  27., 15.286, 1194.913, 6.217, 4.925, 46.804, 0.694, 0.393, 1.02, "", "", 
  "", "", "", "", "", "", "", "", "", "", "", "", "", "", "", "", "", "", "", 
  "", "", "", "", "", 12.04, 3.8928341*^7, 54.422, 18.6, 2.581, 1.337, 
  1803.987, "", 597.029, 9.59, "", "", 37.746, 0.5, 64.83, 0.511}, 
 {"AFG", "Asia", "Afghanistan", "2020-12-02", 46718., 202., 190.571, 1841., 
  19., 16.143, 1200.103, 5.189, 4.895, 47.292, 0.488, 0.415, 1.01, "", "", 
  "", "", "", "", "", "", "", "", "", "", "", "", "", "", "", "", "", "", "", 
  "", "", "", "", "", 12.04, 3.8928341*^7, 54.422, 18.6, 2.581, 1.337, 
  1803.987, "", 597.029, 9.59, "", "", 37.746, 0.5, 64.83, 0.511}, 
 {"AFG", "Asia", "Afghanistan", "2020-12-03", 46837., 119., 176.714, 1846., 
  5., 15.571, 1203.159, 3.057, 4.539, 47.42, 0.128, 0.4, 1., "", "", "", "", 
  "", "", "", "", "", "", "", "", "", "", "", "", "", "", "", "", "", "", "", 
  "", "", "", 12.04, 3.8928341*^7, 54.422, 18.6, 2.581, 1.337, 1803.987, "", 
  597.029, 9.59, "", "", 37.746, 0.5, 64.83, 0.511}, 
 {"AFG", "Asia", "Afghanistan", "2020-12-04", 46837., 0., 159.143, 1846., 0., 
  15.143, 1203.159, 0., 4.088, 47.42, 0., 0.389, 1., "", "", "", "", "", "", 
  "", "", "", "", "", "", "", "", "", "", "", "", "", "", "", "", "", "", "", 
  "", 12.04, 3.8928341*^7, 54.422, 18.6, 2.581, 1.337, 1803.987, "", 597.029, 
  9.59, "", "", 37.746, 0.5, 64.83, 0.511}, {"AFG", "Asia", "Afghanistan", 
  "2020-12-05", 47072., 235., 175.429, 1864., 18., 16., 1209.196, 6.037, 
  4.506, 47.883, 0.462, 0.411, 1.01, "", "", "", "", "", "", "", "", "", "", 
  "", "", "", "", "", "", "", "", "", "", "", "", "", "", "", "", 12.04, 
  3.8928341*^7, 54.422, 18.6, 2.581, 1.337, 1803.987, "", 597.029, 9.59, "", 
  "", 37.746, 0.5, 64.83, 0.511}, {"AFG", "Asia", "Afghanistan", 
  "2020-12-06", 47306., 234., 170., 1874., 10., 14.286, 1215.207, 6.011, 
  4.367, 48.14, 0.257, 0.367, 1.01, "", "", "", "", "", "", "", "", "", "", 
  "", "", "", "", "", "", "", "", "", "", "", "", "", "", "", "", 12.04, 
  3.8928341*^7, 54.422, 18.6, 2.581, 1.337, 1803.987, "", 597.029, 9.59, "", 
  "", 37.746, 0.5, 64.83, 0.511}, {"AFG", "Asia", "Afghanistan", 
  "2020-12-07", 47516., 210., 177.429, 1900., 26., 15., 1220.602, 5.395, 
  4.558, 48.808, 0.668, 0.385, 1., "", "", "", "", "", "", "", "", "", "", 
  "", "", "", "", "", "", "", "", "", "", "", "", "", "", "", "", 12.04, 
  3.8928341*^7, 54.422, 18.6, 2.581, 1.337, 1803.987, "", 597.029, 9.59, "", 
  "", 37.746, 0.5, 64.83, 0.511}, {"AFG", "Asia", "Afghanistan", 
  "2020-12-08", 47716., 200., 171.429, 1906., 6., 12., 1225.739, 5.138, 
  4.404, 48.962, 0.154, 0.308, 1., "", "", "", "", "", "", "", "", "", "", 
  "", "", "", "", "", "", "", "", "", "", "", "", "", "", "", "", 12.04, 
  3.8928341*^7, 54.422, 18.6, 2.581, 1.337, 1803.987, "", 597.029, 9.59, "", 
  "", 37.746, 0.5, 64.83, 0.511}, {"AFG", "Asia", "Afghanistan", 
  "2020-12-09", 47851., 135., 161.857, 1919., 13., 11.143, 1229.207, 3.468, 
  4.158, 49.296, 0.334, 0.286, 0.99, "", "", "", "", "", "", "", "", "", "", 
  "", "", "", "", "", "", "", "", "", "", "", "", "", "", "", "", 12.04, 
  3.8928341*^7, 54.422, 18.6, 2.581, 1.337, 1803.987, "", 597.029, 9.59, "", 
  "", 37.746, 0.5, 64.83, 0.511}, {"AFG", "Asia", "Afghanistan", 
  "2020-12-10", 48053., 202., 173.714, 1935., 16., 12.714, 1234.396, 5.189, 
  4.462, 49.707, 0.411, 0.327, 0.99, "", "", "", "", "", "", "", "", "", "", 
  "", "", "", "", "", "", "", "", "", "", "", "", "", "", "", "", 12.04, 
  3.8928341*^7, 54.422, 18.6, 2.581, 1.337, 1803.987, "", 597.029, 9.59, "", 
  "", 37.746, 0.5, 64.83, 0.511}, {"AFG", "Asia", "Afghanistan", 
  "2020-12-11", 48116., 63., 182.714, 1945., 10., 14.143, 1236.015, 1.618, 
  4.694, 49.964, 0.257, 0.363, 0.99, "", "", "", "", "", "", "", "", "", "", 
  "", "", "", "", "", "", "", "", "", "", "", "", "", "", "", "", 12.04, 
  3.8928341*^7, 54.422, 18.6, 2.581, 1.337, 1803.987, "", 597.029, 9.59, "", 
  "", 37.746, 0.5, 64.83, 0.511}, {"AFG", "Asia", "Afghanistan", 
  "2020-12-12", 48229., 113., 165.286, 1956., 11., 13.143, 1238.917, 2.903, 
  4.246, 50.246, 0.283, 0.338, 1., "", "", "", "", "", "", "", "", "", "", 
  "", "", "", "", "", "", "", "", "", "", "", "", "", "", "", "", 12.04, 
  3.8928341*^7, 54.422, 18.6, 2.581, 1.337, 1803.987, "", 597.029, 9.59, "", 
  "", 37.746, 0.5, 64.83, 0.511}, {"AFG", "Asia", "Afghanistan", 
  "2020-12-13", 48527., 298., 174.429, 1965., 9., 13., 1246.573, 7.655, 
  4.481, 50.477, 0.231, 0.334, 1.01, "", "", "", "", "", "", "", "", "", "", 
  "", "", "", "", "", "", "", "", "", "", "", "", "", "", "", "", 12.04, 
  3.8928341*^7, 54.422, 18.6, 2.581, 1.337, 1803.987, "", 597.029, 9.59, "", 
  "", 37.746, 0.5, 64.83, 0.511}, {"AFG", "Asia", "Afghanistan", 
  "2020-12-14", 48718., 191., 171.714, 1969., 4., 9.857, 1251.479, 4.906, 
  4.411, 50.58, 0.103, 0.253, 1., "", "", "", "", "", "", "", "", "", "", "", 
  "", "", "", "", "", "", "", "", "", "", "", "", "", "", "", 12.04, 
  3.8928341*^7, 54.422, 18.6, 2.581, 1.337, 1803.987, "", 597.029, 9.59, "", 
  "", 37.746, 0.5, 64.83, 0.511}, {"AFG", "Asia", "Afghanistan", 
  "2020-12-15", 48952., 234., 176.571, 1995., 26., 12.714, 1257.49, 6.011, 
  4.536, 51.248, 0.668, 0.327, 1., "", "", "", "", "", "", "", "", "", "", 
  "", "", "", "", "", "", "", "", "", "", "", "", "", "", "", "", 12.04, 
  3.8928341*^7, 54.422, 18.6, 2.581, 1.337, 1803.987, "", 597.029, 9.59, "", 
  "", 37.746, 0.5, 64.83, 0.511}, {"AFG", "Asia", "Afghanistan", 
  "2020-12-16", 49161., 209., 187.143, 2011., 16., 13.143, 1262.859, 5.369, 
  4.807, 51.659, 0.411, 0.338, 0.99, "", "", "", "", "", "", "", "", "", "", 
  "", "", "", "", "", "", "", "", "", "", "", "", "", "", "", "", 12.04, 
  3.8928341*^7, 54.422, 18.6, 2.581, 1.337, 1803.987, "", 597.029, 9.59, "", 
  "", 37.746, 0.5, 64.83, 0.511}, {"AFG", "Asia", "Afghanistan", 
  "2020-12-17", 49378., 217., 189.286, 2025., 14., 12.857, 1268.433, 5.574, 
  4.862, 52.019, 0.36, 0.33, 0.97, "", "", "", "", "", "", "", "", "", "", 
  "", "", "", "", "", "", "", "", "", "", "", "", "", "", "", "", 12.04, 
  3.8928341*^7, 54.422, 18.6, 2.581, 1.337, 1803.987, "", 597.029, 9.59, "", 
  "", 37.746, 0.5, 64.83, 0.511}, {"AFG", "Asia", "Afghanistan", 
  "2020-12-18", 49621., 243., 215., 2030., 5., 12.143, 1274.675, 6.242, 
  5.523, 52.147, 0.128, 0.312, 0.96, "", "", "", "", "", "", "", "", "", "", 
  "", "", "", "", "", "", "", "", "", "", "", "", "", "", "", "", 12.04, 
  3.8928341*^7, 54.422, 18.6, 2.581, 1.337, 1803.987, "", 597.029, 9.59, "", 
  "", 37.746, 0.5, 64.83, 0.511}, {"AFG", "Asia", "Afghanistan", 
  "2020-12-19", 49681., 60., 207.429, 2047., 17., 13., 1276.217, 1.541, 
  5.328, 52.584, 0.437, 0.334, 0.93, "", "", "", "", "", "", "", "", "", "", 
  "", "", "", "", "", "", "", "", "", "", "", "", "", "", "", "", 12.04, 
  3.8928341*^7, 54.422, 18.6, 2.581, 1.337, 1803.987, "", 597.029, 9.59, "", 
  "", 37.746, 0.5, 64.83, 0.511}, {"AFG", "Asia", "Afghanistan", 
  "2020-12-20", 49817., 136., 184.286, 2067., 20., 14.571, 1279.71, 3.494, 
  4.734, 53.098, 0.514, 0.374, 0.91, "", "", "", "", "", "", "", "", "", "", 
  "", "", "", "", "", "", "", "", "", "", "", "", "", "", "", "", 12.04, 
  3.8928341*^7, 54.422, 18.6, 2.581, 1.337, 1803.987, "", 597.029, 9.59, "", 
  "", 37.746, 0.5, 64.83, 0.511}, {"AFG", "Asia", "Afghanistan", 
  "2020-12-21", 50013., 196., 185., 2082., 15., 16.143, 1284.745, 5.035, 
  4.752, 53.483, 0.385, 0.415, 0.9, "", "", "", "", "", "", "", "", "", "", 
  "", "", "", "", "", "", "", "", "", "", "", "", "", "", "", "", 12.04, 
  3.8928341*^7, 54.422, 18.6, 2.581, 1.337, 1803.987, "", 597.029, 9.59, "", 
  "", 37.746, 0.5, 64.83, 0.511}, {"AFG", "Asia", "Afghanistan", 
  "2020-12-22", 50190., 177., 176.857, 2096., 14., 14.429, 1289.292, 4.547, 
  4.543, 53.843, 0.36, 0.371, 0.89, "", "", "", "", "", "", "", "", "", "", 
  "", "", "", "", "", "", "", "", "", "", "", "", "", "", "", "", 12.04, 
  3.8928341*^7, 54.422, 18.6, 2.581, 1.337, 1803.987, "", 597.029, 9.59, "", 
  "", 37.746, 0.5, 64.83, 0.511}, {"AFG", "Asia", "Afghanistan", 
  "2020-12-23", 50433., 243., 181.714, 2117., 21., 15.143, 1295.534, 6.242, 
  4.668, 54.382, 0.539, 0.389, 0.87, "", "", "", "", "", "", "", "", "", "", 
  "", "", "", "", "", "", "", "", "", "", "", "", "", "", "", "", 12.04, 
  3.8928341*^7, 54.422, 18.6, 2.581, 1.337, 1803.987, "", 597.029, 9.59, "", 
  "", 37.746, 0.5, 64.83, 0.511}, {"AFG", "Asia", "Afghanistan", 
  "2020-12-24", 50655., 222., 182.429, 2126., 9., 14.429, 1301.237, 5.703, 
  4.686, 54.613, 0.231, 0.371, 0.85, "", "", "", "", "", "", "", "", "", "", 
  "", "", "", "", "", "", "", "", "", "", "", "", "", "", "", "", 12.04, 
  3.8928341*^7, 54.422, 18.6, 2.581, 1.337, 1803.987, "", 597.029, 9.59, "", 
  "", 37.746, 0.5, 64.83, 0.511}, {"AFG", "Asia", "Afghanistan", 
  "2020-12-25", 50810., 155., 169.857, 2139., 13., 15.571, 1305.219, 3.982, 
  4.363, 54.947, 0.334, 0.4, 0.82, "", "", "", "", "", "", "", "", "", "", 
  "", "", "", "", "", "", "", "", "", "", "", "", "", "", "", "", 12.04, 
  3.8928341*^7, 54.422, 18.6, 2.581, 1.337, 1803.987, "", 597.029, 9.59, "", 
  "", 37.746, 0.5, 64.83, 0.511}, {"AFG", "Asia", "Afghanistan", 
  "2020-12-26", 50886., 76., 172.143, 2149., 10., 14.571, 1307.171, 1.952, 
  4.422, 55.204, 0.257, 0.374, 0.78, "", "", "", "", "", "", "", "", "", "", 
  "", "", "", "", "", "", "", "", "", "", "", "", "", "", "", "", 12.04, 
  3.8928341*^7, 54.422, 18.6, 2.581, 1.337, 1803.987, "", 597.029, 9.59, "", 
  "", 37.746, 0.5, 64.83, 0.511}, {"AFG", "Asia", "Afghanistan", 
  "2020-12-27", 51039., 153., 174.571, 2160., 11., 13.286, 1311.101, 3.93, 
  4.484, 55.487, 0.283, 0.341, 0.75, "", "", "", "", "", "", "", "", "", "", 
  "", "", "", "", "", "", "", "", "", "", "", "", "", "", "", "", 12.04, 
  3.8928341*^7, 54.422, 18.6, 2.581, 1.337, 1803.987, "", 597.029, 9.59, "", 
  "", 37.746, 0.5, 64.83, 0.511}, {"AFG", "Asia", "Afghanistan", 
  "2020-12-28", 51280., 241., 181., 2174., 14., 13.143, 1317.292, 6.191, 
  4.65, 55.846, 0.36, 0.338, 0.72, "", "", "", "", "", "", "", "", "", "", 
  "", "", "", "", "", "", "", "", "", "", "", "", "", "", "", "", 12.04, 
  3.8928341*^7, 54.422, 18.6, 2.581, 1.337, 1803.987, "", 597.029, 9.59, "", 
  "", 37.746, 0.5, 64.83, 0.511}, {"AFG", "Asia", "Afghanistan", 
  "2020-12-29", 51350., 70., 165.714, 2179., 5., 11.857, 1319.09, 1.798, 
  4.257, 55.975, 0.128, 0.305, 0.67, "", "", "", "", "", "", "", "", "", "", 
  "", "", "", "", "", "", "", "", "", "", "", "", "", "", "", "", 12.04, 
  3.8928341*^7, 54.422, 18.6, 2.581, 1.337, 1803.987, "", 597.029, 9.59, "", 
  "", 37.746, 0.5, 64.83, 0.511}, {"AFG", "Asia", "Afghanistan", 
  "2020-12-30", 51405., 55., 138.857, 2181., 2., 9.143, 1320.503, 1.413, 
  3.567, 56.026, 0.051, 0.235, 0.63, "", "", "", "", "", "", "", "", "", "", 
  "", "", "", "", "", "", "", "", "", "", "", "", "", "", "", "", 12.04, 
  3.8928341*^7, 54.422, 18.6, 2.581, 1.337, 1803.987, "", 597.029, 9.59, "", 
  "", 37.746, 0.5, 64.83, 0.511}, {"AFG", "Asia", "Afghanistan", 
  "2020-12-31", 51526., 121., 124.429, 2191., 10., 9.286, 1323.612, 3.108, 
  3.196, 56.283, 0.257, 0.239, 0.59, "", "", "", "", "", "", "", "", "", "", 
  "", "", "", "", "", "", "", "", "", "", "", "", "", "", "", "", 12.04, 
  3.8928341*^7, 54.422, 18.6, 2.581, 1.337, 1803.987, "", 597.029, 9.59, "", 
  "", 37.746, 0.5, 64.83, 0.511}, {"AFG", "Asia", "Afghanistan", 
  "2021-01-01", 51526., 0., 102.286, 2191., 0., 7.429, 1323.612, 0., 2.628, 
  56.283, 0., 0.191, 0.56, "", "", "", "", "", "", "", "", "", "", "", "", 
  "", "", "", "", "", "", "", "", "", "", "", "", "", "", 12.04, 
  3.8928341*^7, 54.422, 18.6, 2.581, 1.337, 1803.987, "", 597.029, 9.59, "", 
  "", 37.746, 0.5, 64.83, 0.511}, {"AFG", "Asia", "Afghanistan", 
  "2021-01-02", 51526., 0., 91.429, 2191., 0., 6., 1323.612, 0., 2.349, 
  56.283, 0., 0.154, 0.54, "", "", "", "", "", "", "", "", "", "", "", "", 
  "", "", "", "", "", "", "", "", "", "", "", "", "", "", 12.04, 
  3.8928341*^7, 54.422, 18.6, 2.581, 1.337, 1803.987, "", 597.029, 9.59, "", 
  "", 37.746, 0.5, 64.83, 0.511}, {"AFG", "Asia", "Afghanistan", 
  "2021-01-03", 51526., 0., 69.571, 2191., 0., 4.429, 1323.612, 0., 1.787, 
  56.283, 0., 0.114, 0.52, "", "", "", "", "", "", "", "", "", "", "", "", 
  "", "", "", "", "", "", "", "", "", "", "", "", "", "", 12.04, 
  3.8928341*^7, 54.422, 18.6, 2.581, 1.337, 1803.987, "", 597.029, 9.59, "", 
  "", 37.746, 0.5, 64.83, 0.511}, {"AFG", "Asia", "Afghanistan", 
  "2021-01-04", 53011., 1485., 247.286, 2237., 46., 9., 1361.759, 38.147, 
  6.352, 57.465, 1.182, 0.231, 0.51, "", "", "", "", "", "", "", "", "", "", 
  "", "", "", "", "", "", "", "", "", "", "", "", "", "", "", "", 12.04, 
  3.8928341*^7, 54.422, 18.6, 2.581, 1.337, 1803.987, "", 597.029, 9.59, "", 
  "", 37.746, 0.5, 64.83, 0.511}, {"AFG", "Asia", "Afghanistan", 
  "2021-01-05", 53105., 94., 250.714, 2244., 7., 9.286, 1364.173, 2.415, 
  6.44, 57.644, 0.18, 0.239, 0.51, "", "", "", "", "", "", "", "", "", "", 
  "", "", "", "", "", "", "", "", "", "", "", "", "", "", "", "", 12.04, 
  3.8928341*^7, 54.422, 18.6, 2.581, 1.337, 1803.987, "", 597.029, 9.59, "", 
  "", 37.746, 0.5, 64.83, 0.511}, {"AFG", "Asia", "Afghanistan", 
  "2021-01-06", 53105., 0., 242.857, 2244., 0., 9., 1364.173, 0., 6.239, 
  57.644, 0., 0.231, 0.51, "", "", "", "", "", "", "", "", "", "", "", "", 
  "", "", "", "", "", "", "", "", "", "", "", "", "", "", 12.04, 
  3.8928341*^7, 54.422, 18.6, 2.581, 1.337, 1803.987, "", 597.029, 9.59, "", 
  "", 37.746, 0.5, 64.83, 0.511}, {"AFG", "Asia", "Afghanistan", 
  "2021-01-07", 53207., 102., 240.143, 2253., 9., 8.857, 1366.793, 2.62, 
  6.169, 57.876, 0.231, 0.228, 0.51, "", "", "", "", "", "", "", "", "", "", 
  "", "", "", "", "", "", "", "", "", "", "", "", "", "", "", "", 12.04, 
  3.8928341*^7, 54.422, 18.6, 2.581, 1.337, 1803.987, "", 597.029, 9.59, "", 
  "", 37.746, 0.5, 64.83, 0.511}, {"AFG", "Asia", "Afghanistan", 
  "2021-01-08", 53332., 125., 258., 2257., 4., 9.429, 1370.004, 3.211, 6.628, 
  57.978, 0.103, 0.242, 0.53, "", "", "", "", "", "", "", "", "", "", "", "", 
  "", "", "", "", "", "", "", "", "", "", "", "", "", "", 12.04, 
  3.8928341*^7, 54.422, 18.6, 2.581, 1.337, 1803.987, "", 597.029, 9.59, "", 
  "", 37.746, 0.5, 64.83, 0.511}, {"AFG", "Asia", "Afghanistan", 
  "2021-01-09", 53400., 68., 267.714, 2264., 7., 10.429, 1371.751, 1.747, 
  6.877, 58.158, 0.18, 0.268, 0.54, "", "", "", "", "", "", "", "", "", "", 
  "", "", "", "", "", "", "", "", "", "", "", "", "", "", "", "", 12.04, 
  3.8928341*^7, 54.422, 18.6, 2.581, 1.337, 1803.987, "", 597.029, 9.59, "", 
  "", 37.746, 0.5, 64.83, 0.511}, {"AFG", "Asia", "Afghanistan", 
  "2021-01-10", 53489., 89., 280.429, 2277., 13., 12.286, 1374.037, 2.286, 
  7.204, 58.492, 0.334, 0.316, 0.55, "", "", "", "", "", "", "", "", "", "", 
  "", "", "", "", "", "", "", "", "", "", "", "", "", "", "", "", 12.04, 
  3.8928341*^7, 54.422, 18.6, 2.581, 1.337, 1803.987, "", 597.029, 9.59, "", 
  "", 37.746, 0.5, 64.83, 0.511}, {"AFG", "Asia", "Afghanistan", 
  "2021-01-11", 53538., 49., 75.286, 2288., 11., 7.286, 1375.296, 1.259, 
  1.934, 58.775, 0.283, 0.187, 0.56, "", "", "", "", "", "", "", "", "", "", 
  "", "", "", "", "", "", "", "", "", "", "", "", "", "", "", "", 12.04, 
  3.8928341*^7, 54.422, 18.6, 2.581, 1.337, 1803.987, "", 597.029, 9.59, "", 
  "", 37.746, 0.5, 64.83, 0.511}, {"AFG", "Asia", "Afghanistan", 
  "2021-01-12", 53584., 46., 68.429, 2301., 13., 8.143, 1376.478, 1.182, 
  1.758, 59.109, 0.334, 0.209, 0.58, "", "", "", "", "", "", "", "", "", "", 
  "", "", "", "", "", "", "", "", "", "", "", "", "", "", "", "", 12.04, 
  3.8928341*^7, 54.422, 18.6, 2.581, 1.337, 1803.987, "", 597.029, 9.59, "", 
  "", 37.746, 0.5, 64.83, 0.511}, {"AFG", "Asia", "Afghanistan", 
  "2021-01-13", 53584., 0., 68.429, 2301., 0., 8.143, 1376.478, 0., 1.758, 
  59.109, 0., 0.209, 0.6, "", "", "", "", "", "", "", "", "", "", "", "", "", 
  "", "", "", "", "", "", "", "", "", "", "", "", "", 12.04, 3.8928341*^7, 
  54.422, 18.6, 2.581, 1.337, 1803.987, "", 597.029, 9.59, "", "", 37.746, 
  0.5, 64.83, 0.511}, {"AFG", "Asia", "Afghanistan", "2021-01-14", 53775., 
  191., 81.143, 2314., 13., 8.714, 1381.384, 4.906, 2.084, 59.443, 0.334, 
  0.224, 0.64, "", "", "", "", "", "", "", "", "", "", "", "", "", "", "", 
  "", "", "", "", "", "", "", "", "", "", "", 12.04, 3.8928341*^7, 54.422, 
  18.6, 2.581, 1.337, 1803.987, "", 597.029, 9.59, "", "", 37.746, 0.5, 
  64.83, 0.511}, {"AFG", "Asia", "Afghanistan", "2021-01-15", 53831., 56., 
  71.286, 2324., 10., 9.571, 1382.823, 1.439, 1.831, 59.699, 0.257, 0.246, 
  0.66, "", "", "", "", "", "", "", "", "", "", "", "", "", "", "", "", "", 
  "", "", "", "", "", "", "", "", "", 12.04, 3.8928341*^7, 54.422, 18.6, 
  2.581, 1.337, 1803.987, "", 597.029, 9.59, "", "", 37.746, 0.5, 64.83, 
  0.511}, {"AFG", "Asia", "Afghanistan", "2021-01-16", 53938., 107., 76.857, 
  2336., 12., 10.286, 1385.572, 2.749, 1.974, 60.008, 0.308, 0.264, 0.68, "", 
  "", "", "", "", "", "", "", "", "", "", "", "", "", "", "", "", "", "", "", 
  "", "", "", "", "", "", 12.04, 3.8928341*^7, 54.422, 18.6, 2.581, 1.337, 
  1803.987, "", 597.029, 9.59, "", "", 37.746, 0.5, 64.83, 0.511}, 
 {"AFG", "Asia", "Afghanistan", "2021-01-17", 53984., 46., 70.714, 2339., 3., 
  8.857, 1386.753, 1.182, 1.817, 60.085, 0.077, 0.228, 0.7, "", "", "", "", 
  "", "", "", "", "", "", "", "", "", "", "", "", "", "", "", "", "", "", "", 
  "", "", "", 12.04, 3.8928341*^7, 54.422, 18.6, 2.581, 1.337, 1803.987, "", 
  597.029, 9.59, "", "", 37.746, 0.5, 64.83, 0.511}, 
 {"AFG", "Asia", "Afghanistan", "2021-01-18", 54062., 78., 74.857, 2343., 4., 
  7.857, 1388.757, 2.004, 1.923, 60.188, 0.103, 0.202, 0.72, "", "", "", "", 
  "", "", "", "", "", "", "", "", "", "", "", "", "", "", "", "", "", "", "", 
  "", "", "", 12.04, 3.8928341*^7, 54.422, 18.6, 2.581, 1.337, 1803.987, "", 
  597.029, 9.59, "", "", 37.746, 0.5, 64.83, 0.511}, 
 {"AFG", "Asia", "Afghanistan", "2021-01-19", 54141., 79., 79.571, 2346., 3., 
  6.429, 1390.786, 2.029, 2.044, 60.265, 0.077, 0.165, 0.73, "", "", "", "", 
  "", "", "", "", "", "", "", "", "", "", "", "", "", "", "", "", "", "", "", 
  "", "", "", 12.04, 3.8928341*^7, 54.422, 18.6, 2.581, 1.337, 1803.987, "", 
  597.029, 9.59, "", "", 37.746, 0.5, 64.83, 0.511}, 
 {"AFG", "Asia", "Afghanistan", "2021-01-20", 54278., 137., 99.143, 2354., 
  8., 7.571, 1394.306, 3.519, 2.547, 60.47, 0.206, 0.194, 0.75, "", "", "", 
  "", "", "", "", "", "", "", "", "", "", "", "", "", "", "", "", "", "", "", 
  "", "", "", "", 12.04, 3.8928341*^7, 54.422, 18.6, 2.581, 1.337, 1803.987, 
  "", 597.029, 9.59, "", "", 37.746, 0.5, 64.83, 0.511}, 
 {"AFG", "Asia", "Afghanistan", "2021-01-21", 54403., 125., 89.714, 2363., 
  9., 7., 1397.517, 3.211, 2.305, 60.701, 0.231, 0.18, 0.75, "", "", "", "", 
  "", "", "", "", "", "", "", "", "", "", "", "", "", "", "", "", "", "", "", 
  "", "", "", 12.04, 3.8928341*^7, 54.422, 18.6, 2.581, 1.337, 1803.987, "", 
  597.029, 9.59, "", "", 37.746, 0.5, 64.83, 0.511}, 
 {"AFG", "Asia", "Afghanistan", "2021-01-22", 54483., 80., 93.143, 2370., 7., 
  6.571, 1399.572, 2.055, 2.393, 60.881, 0.18, 0.169, 0.75, "", "", "", "", 
  "", "", "", "", "", "", "", "", "", "", "", "", "", "", "", "", "", "", "", 
  "", "", "", 12.04, 3.8928341*^7, 54.422, 18.6, 2.581, 1.337, 1803.987, "", 
  597.029, 9.59, "", "", 37.746, 0.5, 64.83, 0.511}, 
 {"AFG", "Asia", "Afghanistan", "2021-01-23", 54559., 76., 88.714, 2373., 3., 
  5.286, 1401.524, 1.952, 2.279, 60.958, 0.077, 0.136, 0.74, "", "", "", "", 
  "", "", "", "", "", "", "", "", "", "", "", "", "", "", "", "", "", "", "", 
  "", "", "", 12.04, 3.8928341*^7, 54.422, 18.6, 2.581, 1.337, 1803.987, "", 
  597.029, 9.59, "", "", 37.746, 0.5, 64.83, 0.511}, 
 {"AFG", "Asia", "Afghanistan", "2021-01-24", 54595., 36., 87.286, 2378., 5., 
  5.571, 1402.449, 0.925, 2.242, 61.087, 0.128, 0.143, 0.74, "", "", "", "", 
  "", "", "", "", "", "", "", "", "", "", "", "", "", "", "", "", "", "", "", 
  "", "", "", 12.04, 3.8928341*^7, 54.422, 18.6, 2.581, 1.337, 1803.987, "", 
  597.029, 9.59, "", "", 37.746, 0.5, 64.83, 0.511}, 
 {"AFG", "Asia", "Afghanistan", "2021-01-25", 54672., 77., 87.143, 2385., 7., 
  6., 1404.427, 1.978, 2.239, 61.266, 0.18, 0.154, 0.74, "", "", "", "", "", 
  "", "", "", "", "", "", "", "", "", "", "", "", "", "", "", "", "", "", "", 
  "", "", 12.04, 3.8928341*^7, 54.422, 18.6, 2.581, 1.337, 1803.987, "", 
  597.029, 9.59, "", "", 37.746, 0.5, 64.83, 0.511}, 
 {"AFG", "Asia", "Afghanistan", "2021-01-26", 54750., 78., 87., 2389., 4., 
  6.143, 1406.43, 2.004, 2.235, 61.369, 0.103, 0.158, 0.73, "", "", "", "", 
  "", "", "", "", "", "", "", "", "", "", "", "", "", "", "", "", "", "", "", 
  "", "", "", 12.04, 3.8928341*^7, 54.422, 18.6, 2.581, 1.337, 1803.987, "", 
  597.029, 9.59, "", "", 37.746, 0.5, 64.83, 0.511}, 
 {"AFG", "Asia", "Afghanistan", "2021-01-27", 54854., 104., 82.286, 2389., 
  0., 5., 1409.102, 2.672, 2.114, 61.369, 0., 0.128, 0.73, "", "", "", "", 
  "", "", "", "", "", "", "", "", "", "", "", "", "", "", "", "", "", "", "", 
  "", "", "", 12.04, 3.8928341*^7, 54.422, 18.6, 2.581, 1.337, 1803.987, "", 
  597.029, 9.59, "", "", 37.746, 0.5, 64.83, 0.511}, 
 {"AFG", "Asia", "Afghanistan", "2021-01-28", 54891., 37., 69.714, 2397., 8., 
  4.857, 1410.052, 0.95, 1.791, 61.575, 0.206, 0.125, 0.71, "", "", "", "", 
  "", "", "", "", "", "", "", "", "", "", "", "", "", "", "", "", "", "", "", 
  "", "", "", 12.04, 3.8928341*^7, 54.422, 18.6, 2.581, 1.337, 1803.987, "", 
  597.029, 9.59, "", "", 37.746, 0.5, 64.83, 0.511}, 
 {"AFG", "Asia", "Afghanistan", "2021-01-29", 54939., 48., 65.143, 2399., 2., 
  4.143, 1411.285, 1.233, 1.673, 61.626, 0.051, 0.106, 0.71, "", "", "", "", 
  "", "", "", "", "", "", "", "", "", "", "", "", "", "", "", "", "", "", "", 
  "", "", "", 12.04, 3.8928341*^7, 54.422, 18.6, 2.581, 1.337, 1803.987, "", 
  597.029, 9.59, "", "", 37.746, 0.5, 64.83, 0.511}, 
 {"AFG", "Asia", "Afghanistan", "2021-01-30", 55008., 69., 64.143, 2400., 1., 
  3.857, 1413.058, 1.772, 1.648, 61.652, 0.026, 0.099, 0.7, "", "", "", "", 
  "", "", "", "", "", "", "", "", "", "", "", "", "", "", "", "", "", "", "", 
  "", "", "", 12.04, 3.8928341*^7, 54.422, 18.6, 2.581, 1.337, 1803.987, "", 
  597.029, 9.59, "", "", 37.746, 0.5, 64.83, 0.511}, 
 {"AFG", "Asia", "Afghanistan", "2021-01-31", 55023., 15., 61.143, 2400., 0., 
  3.143, 1413.443, 0.385, 1.571, 61.652, 0., 0.081, 0.7, "", "", "", "", "", 
  "", "", "", "", "", "", "", "", "", "", "", "", "", "", "", "", "", "", "", 
  "", "", 12.04, 3.8928341*^7, 54.422, 18.6, 2.581, 1.337, 1803.987, "", 
  597.029, 9.59, "", "", 37.746, 0.5, 64.83, 0.511}, 
 {"AFG", "Asia", "Afghanistan", "2021-02-01", 55059., 36., 55.286, 2404., 4., 
  2.714, 1414.368, 0.925, 1.42, 61.754, 0.103, 0.07, 0.69, "", "", "", "", 
  "", "", "", "", "", "", "", "", "", "", "", "", "", "", "", "", "", "", "", 
  "", "", "", 12.04, 3.8928341*^7, 54.422, 18.6, 2.581, 1.337, 1803.987, "", 
  597.029, 9.59, "", "", 37.746, 0.5, 64.83, 0.511}, 
 {"AFG", "Asia", "Afghanistan", "2021-02-02", 55121., 62., 53., 2405., 1., 
  2.286, 1415.961, 1.593, 1.361, 61.78, 0.026, 0.059, 0.7, "", "", "", "", 
  "", "", "", "", "", "", "", "", "", "", "", "", "", "", "", "", "", "", "", 
  "", "", "", 12.04, 3.8928341*^7, 54.422, 18.6, 2.581, 1.337, 1803.987, "", 
  597.029, 9.59, "", "", 37.746, 0.5, 64.83, 0.511}, 
 {"AFG", "Asia", "Afghanistan", "2021-02-03", 55174., 53., 45.714, 2406., 1., 
  2.429, 1417.322, 1.361, 1.174, 61.806, 0.026, 0.062, 0.69, "", "", "", "", 
  "", "", "", "", "", "", "", "", "", "", "", "", "", "", "", "", "", "", "", 
  "", "", "", 12.04, 3.8928341*^7, 54.422, 18.6, 2.581, 1.337, 1803.987, "", 
  597.029, 9.59, "", "", 37.746, 0.5, 64.83, 0.511}, 
 {"AFG", "Asia", "Afghanistan", "2021-02-04", 55231., 57., 48.571, 2407., 1., 
  1.429, 1418.786, 1.464, 1.248, 61.832, 0.026, 0.037, 0.69, "", "", "", "", 
  "", "", "", "", "", "", "", "", "", "", "", "", "", "", "", "", "", "", "", 
  "", "", "", 12.04, 3.8928341*^7, 54.422, 18.6, 2.581, 1.337, 1803.987, "", 
  597.029, 9.59, "", "", 37.746, 0.5, 64.83, 0.511}, 
 {"AFG", "Asia", "Afghanistan", "2021-02-05", 55265., 34., 46.571, 2407., 0., 
  1.143, 1419.66, 0.873, 1.196, 61.832, 0., 0.029, 0.68, "", "", "", "", "", 
  "", "", "", "", "", "", "", "", "", "", "", "", "", "", "", "", "", "", "", 
  "", "", 12.04, 3.8928341*^7, 54.422, 18.6, 2.581, 1.337, 1803.987, "", 
  597.029, 9.59, "", "", 37.746, 0.5, 64.83, 0.511}, 
 {"AFG", "Asia", "Afghanistan", "2021-02-06", 55330., 65., 46., 2408., 1., 
  1.143, 1421.33, 1.67, 1.182, 61.857, 0.026, 0.029, 0.67, "", "", "", "", 
  "", "", "", "", "", "", "", "", "", "", "", "", "", "", "", "", "", "", "", 
  "", "", "", 12.04, 3.8928341*^7, 54.422, 18.6, 2.581, 1.337, 1803.987, "", 
  597.029, 9.59, "", "", 37.746, 0.5, 64.83, 0.511}, 
 {"AFG", "Asia", "Afghanistan", "2021-02-07", 55335., 5., 44.571, 2410., 2., 
  1.429, 1421.458, 0.128, 1.145, 61.909, 0.051, 0.037, 0.65, "", "", "", "", 
  "", "", "", "", "", "", "", "", "", "", "", "", "", "", "", "", "", "", "", 
  "", "", "", 12.04, 3.8928341*^7, 54.422, 18.6, 2.581, 1.337, 1803.987, "", 
  597.029, 9.59, "", "", 37.746, 0.5, 64.83, 0.511}, 
 {"AFG", "Asia", "Afghanistan", "2021-02-08", 55359., 24., 42.857, 2413., 3., 
  1.286, 1422.074, 0.617, 1.101, 61.986, 0.077, 0.033, 0.64, "", "", "", "", 
  "", "", "", "", "", "", "", "", "", "", "", "", "", "", "", "", "", "", "", 
  "", "", "", 12.04, 3.8928341*^7, 54.422, 18.6, 2.581, 1.337, 1803.987, "", 
  597.029, 9.59, "", "", 37.746, 0.5, 64.83, 0.511}, 
 {"AFG", "Asia", "Afghanistan", "2021-02-09", 55384., 25., 37.571, 2414., 1., 
  1.286, 1422.717, 0.642, 0.965, 62.011, 0.026, 0.033, 0.64, "", "", "", "", 
  "", "", "", "", "", "", "", "", "", "", "", "", "", "", "", "", "", "", "", 
  "", "", "", 12.04, 3.8928341*^7, 54.422, 18.6, 2.581, 1.337, 1803.987, "", 
  597.029, 9.59, "", "", 37.746, 0.5, 64.83, 0.511}, 
 {"AFG", "Asia", "Afghanistan", "2021-02-10", 55402., 18., 32.571, 2418., 4., 
  1.714, 1423.179, 0.462, 0.837, 62.114, 0.103, 0.044, 0.63, "", "", "", "", 
  "", "", "", "", "", "", "", "", "", "", "", "", "", "", "", "", "", "", "", 
  "", "", "", 12.04, 3.8928341*^7, 54.422, 18.6, 2.581, 1.337, 1803.987, "", 
  597.029, 9.59, "", "", 37.746, 0.5, 64.83, 0.511}, 
 {"AFG", "Asia", "Afghanistan", "2021-02-11", 55420., 18., 27., 2419., 1., 
  1.714, 1423.641, 0.462, 0.694, 62.14, 0.026, 0.044, 0.64, "", "", "", "", 
  "", "", "", "", "", "", "", "", "", "", "", "", "", "", "", "", "", "", "", 
  "", "", "", 12.04, 3.8928341*^7, 54.422, 18.6, 2.581, 1.337, 1803.987, "", 
  597.029, 9.59, "", "", 37.746, 0.5, 64.83, 0.511}, 
 {"AFG", "Asia", "Afghanistan", "2021-02-12", 55445., 25., 25.714, 2424., 5., 
  2.429, 1424.284, 0.642, 0.661, 62.268, 0.128, 0.062, 0.65, "", "", "", "", 
  "", "", "", "", "", "", "", "", "", "", "", "", "", "", "", "", "", "", "", 
  "", "", "", 12.04, 3.8928341*^7, 54.422, 18.6, 2.581, 1.337, 1803.987, "", 
  597.029, 9.59, "", "", 37.746, 0.5, 64.83, 0.511}, 
 {"AFG", "Asia", "Afghanistan", "2021-02-13", 55473., 28., 20.429, 2427., 3., 
  2.714, 1425.003, 0.719, 0.525, 62.345, 0.077, 0.07, 0.66, "", "", "", "", 
  "", "", "", "", "", "", "", "", "", "", "", "", "", "", "", "", "", "", "", 
  "", "", "", 12.04, 3.8928341*^7, 54.422, 18.6, 2.581, 1.337, 1803.987, "", 
  597.029, 9.59, "", "", 37.746, 0.5, 64.83, 0.511}, 
 {"AFG", "Asia", "Afghanistan", "2021-02-14", 55492., 19., 22.429, 2427., 0., 
  2.429, 1425.491, 0.488, 0.576, 62.345, 0., 0.062, 0.67, "", "", "", "", "", 
  "", "", "", "", "", "", "", "", "", "", "", "", "", "", "", "", "", "", "", 
  "", "", 12.04, 3.8928341*^7, 54.422, 18.6, 2.581, 1.337, 1803.987, "", 
  597.029, 9.59, "", "", 37.746, 0.5, 64.83, 0.511}, 
 {"AFG", "Asia", "Afghanistan", "2021-02-15", 55514., 22., 22.143, 2427., 0., 
  2., 1426.056, 0.565, 0.569, 62.345, 0., 0.051, 0.67, "", "", "", "", "", 
  "", "", "", "", "", "", "", "", "", "", "", "", "", "", "", "", "", "", "", 
  "", "", 12.04, 3.8928341*^7, 54.422, 18.6, 2.581, 1.337, 1803.987, "", 
  597.029, 9.59, "", "", 37.746, 0.5, 64.83, 0.511}, 
 {"AFG", "Asia", "Afghanistan", "2021-02-16", 55518., 4., 19.143, 2428., 1., 
  2., 1426.159, 0.103, 0.492, 62.371, 0.026, 0.051, 0.67, "", "", "", "", "", 
  "", "", "", "", "", "", "", "", "", "", "", "", "", "", "", "", "", "", "", 
  "", "", 12.04, 3.8928341*^7, 54.422, 18.6, 2.581, 1.337, 1803.987, "", 
  597.029, 9.59, "", "", 37.746, 0.5, 64.83, 0.511}, 
 {"AFG", "Asia", "Afghanistan", "2021-02-17", 55540., 22., 19.714, 2428., 0., 
  1.429, 1426.724, 0.565, 0.506, 62.371, 0., 0.037, 0.69, "", "", "", "", "", 
  "", "", "", "", "", "", "", "", "", "", "", "", "", "", "", "", "", "", "", 
  "", "", 12.04, 3.8928341*^7, 54.422, 18.6, 2.581, 1.337, 1803.987, "", 
  597.029, 9.59, "", "", 37.746, 0.5, 64.83, 0.511}, 
 {"AFG", "Asia", "Afghanistan", "2021-02-18", 55557., 17., 19.571, 2430., 2., 
  1.571, 1427.161, 0.437, 0.503, 62.422, 0.051, 0.04, 0.71, "", "", "", "", 
  "", "", "", "", "", "", "", "", "", "", "", "", "", "", "", "", "", "", "", 
  "", "", "", 12.04, 3.8928341*^7, 54.422, 18.6, 2.581, 1.337, 1803.987, "", 
  597.029, 9.59, "", "", 37.746, 0.5, 64.83, 0.511}, 
 {"AFG", "Asia", "Afghanistan", "2021-02-19", 55575., 18., 18.571, 2430., 0., 
  0.857, 1427.623, 0.462, 0.477, 62.422, 0., 0.022, 0.72, "", "", "", "", "", 
  "", "", "", "", "", "", "", "", "", "", "", "", "", "", "", "", "", "", "", 
  "", "", 12.04, 3.8928341*^7, 54.422, 18.6, 2.581, 1.337, 1803.987, "", 
  597.029, 9.59, "", "", 37.746, 0.5, 64.83, 0.511}, 
 {"AFG", "Asia", "Afghanistan", "2021-02-20", 55580., 5., 15.286, 2430., 0., 
  0.429, 1427.752, 0.128, 0.393, 62.422, 0., 0.011, 0.75, "", "", "", "", "", 
  "", "", "", "", "", "", "", "", "", "", "", "", "", "", "", "", "", "", "", 
  "", "", 12.04, 3.8928341*^7, 54.422, 18.6, 2.581, 1.337, 1803.987, "", 
  597.029, 9.59, "", "", 37.746, 0.5, 64.83, 0.511}, 
 {"AFG", "Asia", "Afghanistan", "2021-02-21", 55604., 24., 16., 2432., 2., 
  0.714, 1428.368, 0.617, 0.411, 62.474, 0.051, 0.018, 0.78, "", "", "", "", 
  "", "", "", "", "", "", "", "", "", "", "", "", "", "", "", "", "", "", "", 
  "", "", "", 12.04, 3.8928341*^7, 54.422, 18.6, 2.581, 1.337, 1803.987, "", 
  597.029, 9.59, "", "", 37.746, 0.5, 64.83, 0.511}, 
 {"AFG", "Asia", "Afghanistan", "2021-02-22", 55617., 13., 14.714, 2433., 1., 
  0.857, 1428.702, 0.334, 0.378, 62.499, 0.026, 0.022, 0.8, "", "", "", "", 
  "", "", "", "", "", "", "", "", "", "", "", "", "", 0., 0., "", "", "", 0., 
  0., "", "", 12.04, 3.8928341*^7, 54.422, 18.6, 2.581, 1.337, 1803.987, "", 
  597.029, 9.59, "", "", 37.746, 0.5, 64.83, 0.511}, 
 {"AFG", "Asia", "Afghanistan", "2021-02-23", 55646., 29., 18.286, 2435., 2., 
  1., 1429.447, 0.745, 0.47, 62.551, 0.051, 0.026, 0.82, "", "", "", "", "", 
  "", "", "", "", "", "", "", "", "", "", "", "", "", "", "", "", 1367., "", 
  "", "", 35., 12.04, 3.8928341*^7, 54.422, 18.6, 2.581, 1.337, 1803.987, "", 
  597.029, 9.59, "", "", 37.746, 0.5, 64.83, 0.511}, 
 {"AFG", "Asia", "Afghanistan", "2021-02-24", 55664., 18., 17.714, 2436., 1., 
  1.143, 1429.909, 0.462, 0.455, 62.577, 0.026, 0.029, 0.83, "", "", "", "", 
  "", "", "", "", "", "", "", "", "", "", "", "", "", "", "", "", "", 1367., 
  "", "", "", 35., 12.04, 3.8928341*^7, 54.422, 18.6, 2.581, 1.337, 1803.987, 
  "", 597.029, 9.59, "", "", 37.746, 0.5, 64.83, 0.511}, 
 {"AFG", "Asia", "Afghanistan", "2021-02-25", 55680., 16., 17.571, 2438., 2., 
  1.143, 1430.32, 0.411, 0.451, 62.628, 0.051, 0.029, 0.84, "", "", "", "", 
  "", "", "", "", "", "", "", "", "", "", "", "", "", "", "", "", "", 1367., 
  "", "", "", 35., 12.04, 3.8928341*^7, 54.422, 18.6, 2.581, 1.337, 1803.987, 
  "", 597.029, 9.59, "", "", 37.746, 0.5, 64.83, 0.511}, 
 {"AFG", "Asia", "Afghanistan", "2021-02-26", 55696., 16., 17.286, 2442., 4., 
  1.714, 1430.731, 0.411, 0.444, 62.731, 0.103, 0.044, 0.85, "", "", "", "", 
  "", "", "", "", "", "", "", "", "", "", "", "", "", "", "", "", "", 1367., 
  "", "", "", 35., 12.04, 3.8928341*^7, 54.422, 18.6, 2.581, 1.337, 1803.987, 
  "", 597.029, 9.59, "", "", 37.746, 0.5, 64.83, 0.511}, 
 {"AFG", "Asia", "Afghanistan", "2021-02-27", 55707., 11., 18.143, 2443., 1., 
  1.857, 1431.014, 0.283, 0.466, 62.756, 0.026, 0.048, 0.87, "", "", "", "", 
  "", "", "", "", "", "", "", "", "", "", "", "", "", "", "", "", "", 1367., 
  "", "", "", 35., 12.04, 3.8928341*^7, 54.422, 18.6, 2.581, 1.337, 1803.987, 
  "", 597.029, 9.59, "", "", 37.746, 0.5, 64.83, 0.511}, 
 {"AFG", "Asia", "Afghanistan", "2021-02-28", 55714., 7., 15.714, 2443., 0., 
  1.571, 1431.194, 0.18, 0.404, 62.756, 0., 0.04, 0.9, "", "", "", "", "", 
  "", "", "", "", "", "", "", "", "", "", "", "", 8200., 8200., "", "", 
  1367., 0.02, 0.02, "", 35., 12.04, 3.8928341*^7, 54.422, 18.6, 2.581, 
  1.337, 1803.987, "", 597.029, 9.59, "", "", 37.746, 0.5, 64.83, 0.511}, 
 {"AFG", "Asia", "Afghanistan", "2021-03-01", 55733., 19., 16.571, 2444., 1., 
  1.571, 1431.682, 0.488, 0.426, 62.782, 0.026, 0.04, 0.93, "", "", "", "", 
  "", "", "", "", "", "", "", "", "", "", "", "", "", "", "", "", "", 1580., 
  "", "", "", 41., 12.04, 3.8928341*^7, 54.422, 18.6, 2.581, 1.337, 1803.987, 
  "", 597.029, 9.59, "", "", 37.746, 0.5, 64.83, 0.511}, 
 {"AFG", "Asia", "Afghanistan", "2021-03-02", 55759., 26., 16.143, 2446., 2., 
  1.571, 1432.35, 0.668, 0.415, 62.833, 0.051, 0.04, 0.95, "", "", "", "", 
  "", "", "", "", "", "", "", "", "", "", "", "", "", "", "", "", "", 1794., 
  "", "", "", 46., 12.04, 3.8928341*^7, 54.422, 18.6, 2.581, 1.337, 1803.987, 
  "", 597.029, 9.59, "", "", 37.746, 0.5, 64.83, 0.511}, 
 {"AFG", "Asia", "Afghanistan", "2021-03-03", 55770., 11., 15.143, 2446., 0., 
  1.429, 1432.632, 0.283, 0.389, 62.833, 0., 0.037, 0.97, "", "", "", "", "", 
  "", "", "", "", "", "", "", "", "", "", "", "", "", "", "", "", 2008., "", 
  "", "", 52., 12.04, 3.8928341*^7, 54.422, 18.6, 2.581, 1.337, 1803.987, "", 
  597.029, 9.59, "", "", 37.746, 0.5, 64.83, 0.511}, 
 {"AFG", "Asia", "Afghanistan", "2021-03-04", 55775., 5., 13.571, 2446., 0., 
  1.143, 1432.761, 0.128, 0.349, 62.833, 0., 0.029, 0.99, "", "", "", "", "", 
  "", "", "", "", "", "", "", "", "", "", "", "", "", "", "", "", 2221., "", 
  "", "", 57., 12.04, 3.8928341*^7, 54.422, 18.6, 2.581, 1.337, 1803.987, "", 
  597.029, 9.59, "", "", 37.746, 0.5, 64.83, 0.511}, 
 {"AFG", "Asia", "Afghanistan", "2021-03-05", 55827., 52., 18.714, 2449., 3., 
  1., 1434.097, 1.336, 0.481, 62.91, 0.077, 0.026, 1.03, "", "", "", "", "", 
  "", "", "", "", "", "", "", "", "", "", "", "", "", "", "", "", 2435., "", 
  "", "", 63., 12.04, 3.8928341*^7, 54.422, 18.6, 2.581, 1.337, 1803.987, "", 
  597.029, 9.59, "", "", 37.746, 0.5, 64.83, 0.511}, 
 {"AFG", "Asia", "Afghanistan", "2021-03-06", 55840., 13., 19., 2449., 0., 
  0.857, 1434.431, 0.334, 0.488, 62.91, 0., 0.022, 1.03, "", "", "", "", "", 
  "", "", "", "", "", "", "", "", "", "", "", "", "", "", "", "", 2649., "", 
  "", "", 68., 12.04, 3.8928341*^7, 54.422, 18.6, 2.581, 1.337, 1803.987, "", 
  597.029, 9.59, "", "", 37.746, 0.5, 64.83, 0.511}, 
 {"AFG", "Asia", "Afghanistan", "2021-03-07", 55847., 7., 19., 2449., 0., 
  0.857, 1434.61, 0.18, 0.488, 62.91, 0., 0.022, 1.03, "", "", "", "", "", 
  "", "", "", "", "", "", "", "", "", "", "", "", "", "", "", "", 2862., "", 
  "", "", 74., 12.04, 3.8928341*^7, 54.422, 18.6, 2.581, 1.337, 1803.987, "", 
  597.029, 9.59, "", "", 37.746, 0.5, 64.83, 0.511}, 
 {"AFG", "Asia", "Afghanistan", "2021-03-08", 55876., 29., 20.429, 2451., 2., 
  1., 1435.355, 0.745, 0.525, 62.962, 0.051, 0.026, 1.03, "", "", "", "", "", 
  "", "", "", "", "", "", "", "", "", "", "", "", "", "", "", "", 2862., "", 
  "", "", 74., 12.04, 3.8928341*^7, 54.422, 18.6, 2.581, 1.337, 1803.987, "", 
  597.029, 9.59, "", "", 37.746, 0.5, 64.83, 0.511}, 
 {"AFG", "Asia", "Afghanistan", "2021-03-09", 55876., 0., 16.714, 2451., 0., 
  0.714, 1435.355, 0., 0.429, 62.962, 0., 0.018, 1.03, "", "", "", "", "", 
  "", "", "", "", "", "", "", "", "", "", "", "", "", "", "", "", 2862., "", 
  "", "", 74., 12.04, 3.8928341*^7, 54.422, 18.6, 2.581, 1.337, 1803.987, "", 
  597.029, 9.59, "", "", 37.746, 0.5, 64.83, 0.511}, 
 {"AFG", "Asia", "Afghanistan", "2021-03-10", 55894., 18., 17.714, 2451., 0., 
  0.714, 1435.818, 0.462, 0.455, 62.962, 0., 0.018, 1.05, "", "", "", "", "", 
  "", "", "", "", "", "", "", "", "", "", "", "", "", "", "", "", 2862., "", 
  "", "", 74., 30.56, 3.8928341*^7, 54.422, 18.6, 2.581, 1.337, 1803.987, "", 
  597.029, 9.59, "", "", 37.746, 0.5, 64.83, 0.511}, 
 {"AFG", "Asia", "Afghanistan", "2021-03-11", 55917., 23., 20.286, 2451., 0., 
  0.714, 1436.409, 0.591, 0.521, 62.962, 0., 0.018, 1.07, "", "", "", "", "", 
  "", "", "", "", "", "", "", "", "", "", "", "", "", "", "", "", 2862., "", 
  "", "", 74., 30.56, 3.8928341*^7, 54.422, 18.6, 2.581, 1.337, 1803.987, "", 
  597.029, 9.59, "", "", 37.746, 0.5, 64.83, 0.511}, 
 {"AFG", "Asia", "Afghanistan", "2021-03-12", 55959., 42., 18.857, 2454., 3., 
  0.714, 1437.487, 1.079, 0.484, 63.039, 0.077, 0.018, 1.08, "", "", "", "", 
  "", "", "", "", "", "", "", "", "", "", "", "", "", "", "", "", "", 2862., 
  "", "", "", 74., 30.56, 3.8928341*^7, 54.422, 18.6, 2.581, 1.337, 1803.987, 
  "", 597.029, 9.59, "", "", 37.746, 0.5, 64.83, 0.511}, 
 {"AFG", "Asia", "Afghanistan", "2021-03-13", 55959., 0., 17., 2454., 0., 
  0.714, 1437.487, 0., 0.437, 63.039, 0., 0.018, 1.08, "", "", "", "", "", 
  "", "", "", "", "", "", "", "", "", "", "", "", "", "", "", "", 2862., "", 
  "", "", 74., 30.56, 3.8928341*^7, 54.422, 18.6, 2.581, 1.337, 1803.987, "", 
  597.029, 9.59, "", "", 37.746, 0.5, 64.83, 0.511}, 
 {"AFG", "Asia", "Afghanistan", "2021-03-14", 55985., 26., 19.714, 2457., 3., 
  1.143, 1438.155, 0.668, 0.506, 63.116, 0.077, 0.029, 1.09, "", "", "", "", 
  "", "", "", "", "", "", "", "", "", "", "", "", "", "", "", "", "", 2862., 
  "", "", "", 74., 30.56, 3.8928341*^7, 54.422, 18.6, 2.581, 1.337, 1803.987, 
  "", 597.029, 9.59, "", "", 37.746, 0.5, 64.83, 0.511}, 
 {"AFG", "Asia", "Afghanistan", "2021-03-15", 55985., 0., 15.571, 2459., 2., 
  1.143, 1438.155, 0., 0.4, 63.167, 0.051, 0.029, 1.08, "", "", "", "", "", 
  "", "", "", "", "", "", "", "", "", "", "", "", "", "", "", "", 2862., "", 
  "", "", 74., 30.56, 3.8928341*^7, 54.422, 18.6, 2.581, 1.337, 1803.987, "", 
  597.029, 9.59, "", "", 37.746, 0.5, 64.83, 0.511}, 
 {"AFG", "Asia", "Afghanistan", "2021-03-16", 55995., 10., 17., 2460., 1., 
  1.286, 1438.412, 0.257, 0.437, 63.193, 0.026, 0.033, 1.11, "", "", "", "", 
  "", "", "", "", "", "", "", "", "", "", "", "", "", 54000., 54000., "", "", 
  2862., 0.14, 0.14, "", 74., 30.56, 3.8928341*^7, 54.422, 18.6, 2.581, 
  1.337, 1803.987, "", 597.029, 9.59, "", "", 37.746, 0.5, 64.83, 0.511}, 
 {"AFG", "Asia", "Afghanistan", "2021-03-17", 56016., 21., 17.429, 2460., 0., 
  1.286, 1438.952, 0.539, 0.448, 63.193, 0., 0.033, 1.14, "", "", "", "", "", 
  "", "", "", "", "", "", "", "", "", "", "", "", "", "", "", "", 2882., "", 
  "", "", 74., 30.56, 3.8928341*^7, 54.422, 18.6, 2.581, 1.337, 1803.987, "", 
  597.029, 9.59, "", "", 37.746, 0.5, 64.83, 0.511}, 
 {"AFG", "Asia", "Afghanistan", "2021-03-18", 56044., 28., 18.143, 2462., 2., 
  1.571, 1439.671, 0.719, 0.466, 63.244, 0.051, 0.04, 1.18, "", "", "", "", 
  "", "", "", "", "", "", "", "", "", "", "", "", "", "", "", "", "", 2902., 
  "", "", "", 75., 30.56, 3.8928341*^7, 54.422, 18.6, 2.581, 1.337, 1803.987, 
  "", 597.029, 9.59, "", "", 37.746, 0.5, 64.83, 0.511}, 
 {"AFG", "Asia", "Afghanistan", "2021-03-19", 56069., 25., 15.714, 2462., 0., 
  1.143, 1440.313, 0.642, 0.404, 63.244, 0., 0.029, 1.2, "", "", "", "", "", 
  "", "", "", "", "", "", "", "", "", "", "", "", "", "", "", "", 2921., "", 
  "", "", 75., 30.56, 3.8928341*^7, 54.422, 18.6, 2.581, 1.337, 1803.987, "", 
  597.029, 9.59, "", "", 37.746, 0.5, 64.83, 0.511}, 
 {"AFG", "Asia", "Afghanistan", "2021-03-20", 56093., 24., 19.143, 2462., 0., 
  1.143, 1440.93, 0.617, 0.492, 63.244, 0., 0.029, 1.23, "", "", "", "", "", 
  "", "", "", "", "", "", "", "", "", "", "", "", "", "", "", "", 2941., "", 
  "", "", 76., 30.56, 3.8928341*^7, 54.422, 18.6, 2.581, 1.337, 1803.987, "", 
  597.029, 9.59, "", "", 37.746, 0.5, 64.83, 0.511}, 
 {"AFG", "Asia", "Afghanistan", "2021-03-21", 56103., 10., 16.857, 2463., 1., 
  0.857, 1441.187, 0.257, 0.433, 63.27, 0.026, 0.022, 1.25, "", "", "", "", 
  "", "", "", "", "", "", "", "", "", "", "", "", "", "", "", "", "", 2961., 
  "", "", "", 76., 30.56, 3.8928341*^7, 54.422, 18.6, 2.581, 1.337, 1803.987, 
  "", 597.029, 9.59, "", "", 37.746, 0.5, 64.83, 0.511}, 
 {"AFG", "Asia", "Afghanistan", "2021-03-22", 56153., 50., 24., 2464., 1., 
  0.714, 1442.471, 1.284, 0.617, 63.296, 0.026, 0.018, 1.28, "", "", "", "", 
  "", "", "", "", "", "", "", "", "", "", "", "", "", "", "", "", "", 2980., 
  "", "", "", 77., 30.56, 3.8928341*^7, 54.422, 18.6, 2.581, 1.337, 1803.987, 
  "", 597.029, 9.59, "", "", 37.746, 0.5, 64.83, 0.511}, 
 {"AFG", "Asia", "Afghanistan", "2021-03-23", 56177., 24., 26., 2466., 2., 
  0.857, 1443.087, 0.617, 0.668, 63.347, 0.051, 0.022, 1.27, "", "", "", "", 
  "", "", "", "", "", "", "", "", "", "", "", "", "", "", "", "", "", 3000., 
  "", "", "", 77., 26.85, 3.8928341*^7, 54.422, 18.6, 2.581, 1.337, 1803.987, 
  "", 597.029, 9.59, "", "", 37.746, 0.5, 64.83, 0.511}, 
 {"AFG", "Asia", "Afghanistan", "2021-03-24", 56192., 15., 25.143, 2466., 0., 
  0.857, 1443.473, 0.385, 0.646, 63.347, 0., 0.022, 1.27, "", "", "", "", "", 
  "", "", "", "", "", "", "", "", "", "", "", "", "", "", "", "", 3000., "", 
  "", "", 77., 26.85, 3.8928341*^7, 54.422, 18.6, 2.581, 1.337, 1803.987, "", 
  597.029, 9.59, "", "", 37.746, 0.5, 64.83, 0.511}, 
 {"AFG", "Asia", "Afghanistan", "2021-03-25", 56226., 34., 26., 2467., 1., 
  0.714, 1444.346, 0.873, 0.668, 63.373, 0.026, 0.018, 1.29, "", "", "", "", 
  "", "", "", "", "", "", "", "", "", "", "", "", "", "", "", "", "", 3000., 
  "", "", "", 77., 26.85, 3.8928341*^7, 54.422, 18.6, 2.581, 1.337, 1803.987, 
  "", 597.029, 9.59, "", "", 37.746, 0.5, 64.83, 0.511}, 
 {"AFG", "Asia", "Afghanistan", "2021-03-26", 56254., 28., 26.429, 2467., 0., 
  0.714, 1445.065, 0.719, 0.679, 63.373, 0., 0.018, 1.31, "", "", "", "", "", 
  "", "", "", "", "", "", "", "", "", "", "", "", "", "", "", "", 3000., "", 
  "", "", 77., 26.85, 3.8928341*^7, 54.422, 18.6, 2.581, 1.337, 1803.987, "", 
  597.029, 9.59, "", "", 37.746, 0.5, 64.83, 0.511}, 
 {"AFG", "Asia", "Afghanistan", "2021-03-27", 56290., 36., 28.143, 2469., 2., 
  1., 1445.99, 0.925, 0.723, 63.424, 0.051, 0.026, 1.33, "", "", "", "", "", 
  "", "", "", "", "", "", "", "", "", "", "", "", "", "", "", "", 3000., "", 
  "", "", 77., 26.85, 3.8928341*^7, 54.422, 18.6, 2.581, 1.337, 1803.987, "", 
  597.029, 9.59, "", "", 37.746, 0.5, 64.83, 0.511}, 
 {"AFG", "Asia", "Afghanistan", "2021-03-28", 56294., 4., 27.286, 2470., 1., 
  1., 1446.093, 0.103, 0.701, 63.45, 0.026, 0.026, 1.35, "", "", "", "", "", 
  "", "", "", "", "", "", "", "", "", "", "", "", "", "", "", "", 3000., "", 
  "", "", 77., 26.85, 3.8928341*^7, 54.422, 18.6, 2.581, 1.337, 1803.987, "", 
  597.029, 9.59, "", "", 37.746, 0.5, 64.83, 0.511}, 
 {"AFG", "Asia", "Afghanistan", "2021-03-29", 56322., 28., 24.143, 2472., 2., 
  1.143, 1446.812, 0.719, 0.62, 63.501, 0.051, 0.029, 1.39, "", "", "", "", 
  "", "", "", "", "", "", "", "", "", "", "", "", "", "", "", "", "", 3000., 
  "", "", "", 77., 26.85, 3.8928341*^7, 54.422, 18.6, 2.581, 1.337, 1803.987, 
  "", 597.029, 9.59, "", "", 37.746, 0.5, 64.83, 0.511}, 
 {"AFG", "Asia", "Afghanistan", "2021-03-30", 56384., 62., 29.571, 2476., 4., 
  1.429, 1448.405, 1.593, 0.76, 63.604, 0.103, 0.037, 1.43, "", "", "", "", 
  "", "", "", "", "", "", "", "", "", "", "", "", "", "", "", "", "", 3000., 
  "", "", "", 77., 26.85, 3.8928341*^7, 54.422, 18.6, 2.581, 1.337, 1803.987, 
  "", 597.029, 9.59, "", "", 37.746, 0.5, 64.83, 0.511}, 
 {"AFG", "Asia", "Afghanistan", "2021-03-31", 56454., 70., 37.429, 2484., 8., 
  2.571, 1450.203, 1.798, 0.961, 63.81, 0.206, 0.066, 1.44, "", "", "", "", 
  "", "", "", "", "", "", "", "", "", "", "", "", "", "", "", "", "", 3000., 
  "", "", "", 77., 26.85, 3.8928341*^7, 54.422, 18.6, 2.581, 1.337, 1803.987, 
  "", 597.029, 9.59, "", "", 37.746, 0.5, 64.83, 0.511}, 
 {"AFG", "Asia", "Afghanistan", "2021-04-01", 56517., 63., 41.571, 2489., 5., 
  3.143, 1451.821, 1.618, 1.068, 63.938, 0.128, 0.081, 1.44, "", "", "", "", 
  "", "", "", "", "", "", "", "", "", "", "", "", "", "", "", "", "", 3000., 
  "", "", "", 77., 26.85, 3.8928341*^7, 54.422, 18.6, 2.581, 1.337, 1803.987, 
  "", 597.029, 9.59, "", "", 37.746, 0.5, 64.83, 0.511}, 
 {"AFG", "Asia", "Afghanistan", "2021-04-02", 56572., 55., 45.429, 2495., 6., 
  4., 1453.234, 1.413, 1.167, 64.092, 0.154, 0.103, 1.43, "", "", "", "", "", 
  "", "", "", "", "", "", "", "", "", "", "", "", "", "", "", "", 3000., "", 
  "", "", 77., 26.85, 3.8928341*^7, 54.422, 18.6, 2.581, 1.337, 1803.987, "", 
  597.029, 9.59, "", "", 37.746, 0.5, 64.83, 0.511}, 
 {"AFG", "Asia", "Afghanistan", "2021-04-03", 56595., 23., 43.571, 2496., 1., 
  3.857, 1453.825, 0.591, 1.119, 64.118, 0.026, 0.099, 1.42, "", "", "", "", 
  "", "", "", "", "", "", "", "", "", "", "", "", "", "", "", "", "", 3000., 
  "", "", "", 77., 26.85, 3.8928341*^7, 54.422, 18.6, 2.581, 1.337, 1803.987, 
  "", 597.029, 9.59, "", "", 37.746, 0.5, 64.83, 0.511}, 
 {"AFG", "Asia", "Afghanistan", "2021-04-04", 56676., 81., 54.571, 2497., 1., 
  3.857, 1455.906, 2.081, 1.402, 64.143, 0.026, 0.099, 1.43, "", "", "", "", 
  "", "", "", "", "", "", "", "", "", "", "", "", "", "", "", "", "", 3000., 
  "", "", "", 77., 26.85, 3.8928341*^7, 54.422, 18.6, 2.581, 1.337, 1803.987, 
  "", 597.029, 9.59, "", "", 37.746, 0.5, 64.83, 0.511}, 
 {"AFG", "Asia", "Afghanistan", "2021-04-05", 56717., 41., 56.429, 2508., 
  11., 5.143, 1456.959, 1.053, 1.45, 64.426, 0.283, 0.132, 1.42, "", "", "", 
  "", "", "", "", "", "", "", "", "", "", "", "", "", "", "", "", "", "", 
  3000., "", "", "", 77., 26.85, 3.8928341*^7, 54.422, 18.6, 2.581, 1.337, 
  1803.987, "", 597.029, 9.59, "", "", 37.746, 0.5, 64.83, 0.511}, 
 {"AFG", "Asia", "Afghanistan", "2021-04-06", 56779., 62., 56.429, 2512., 4., 
  5.143, 1458.552, 1.593, 1.45, 64.529, 0.103, 0.132, 1.41, "", "", "", "", 
  "", "", "", "", "", "", "", "", "", "", "", "", "", "", "", "", "", 3000., 
  "", "", "", 77., 26.85, 3.8928341*^7, 54.422, 18.6, 2.581, 1.337, 1803.987, 
  "", 597.029, 9.59, "", "", 37.746, 0.5, 64.83, 0.511}, 
 {"AFG", "Asia", "Afghanistan", "2021-04-07", 56873., 94., 59.857, 2512., 0., 
  4., 1460.966, 2.415, 1.538, 64.529, 0., 0.103, 1.41, "", "", "", "", "", 
  "", "", "", "", "", "", "", "", "", "", "", "", 120000., 120000., "", "", 
  3000., 0.31, 0.31, "", 77., 26.85, 3.8928341*^7, 54.422, 18.6, 2.581, 
  1.337, 1803.987, "", 597.029, 9.59, "", "", 37.746, 0.5, 64.83, 0.511}, 
 {"AFG", "Asia", "Afghanistan", "2021-04-08", 56943., 70., 60.857, 2516., 4., 
  3.857, 1462.765, 1.798, 1.563, 64.632, 0.103, 0.099, 1.4, "", "", "", "", 
  "", "", "", "", "", "", "", "", "", "", "", "", "", "", "", "", "", 3714., 
  "", "", "", 95., 26.85, 3.8928341*^7, 54.422, 18.6, 2.581, 1.337, 1803.987, 
  "", 597.029, 9.59, "", "", 37.746, 0.5, 64.83, 0.511}, 
 {"AFG", "Asia", "Afghanistan", "2021-04-09", 57019., 76., 63.857, 2521., 5., 
  3.714, 1464.717, 1.952, 1.64, 64.76, 0.128, 0.095, 1.4, "", "", "", "", "", 
  "", "", "", "", "", "", "", "", "", "", "", "", "", "", "", "", 4429., "", 
  "", "", 114., 26.85, 3.8928341*^7, 54.422, 18.6, 2.581, 1.337, 1803.987, 
  "", 597.029, 9.59, "", "", 37.746, 0.5, 64.83, 0.511}, 
 {"AFG", "Asia", "Afghanistan", "2021-04-10", 57144., 125., 78.429, 2521., 
  0., 3.571, 1467.928, 3.211, 2.015, 64.76, 0., 0.092, 1.4, "", "", "", "", 
  "", "", "", "", "", "", "", "", "", "", "", "", "", "", "", "", "", 5143., 
  "", "", "", 132., 26.85, 3.8928341*^7, 54.422, 18.6, 2.581, 1.337, 
  1803.987, "", 597.029, 9.59, "", "", 37.746, 0.5, 64.83, 0.511}, 
 {"AFG", "Asia", "Afghanistan", "2021-04-11", 57160., 16., 69.143, 2521., 0., 
  3.429, 1468.339, 0.411, 1.776, 64.76, 0., 0.088, 1.38, "", "", "", "", "", 
  "", "", "", "", "", "", "", "", "", "", "", "", "", "", "", "", 5857., "", 
  "", "", 150., 26.85, 3.8928341*^7, 54.422, 18.6, 2.581, 1.337, 1803.987, 
  "", 597.029, 9.59, "", "", 37.746, 0.5, 64.83, 0.511}, 
 {"AFG", "Asia", "Afghanistan", "2021-04-12", 57242., 82., 75., 2529., 8., 
  3., 1470.445, 2.106, 1.927, 64.966, 0.206, 0.077, 1.37, "", "", "", "", "", 
  "", "", "", "", "", "", "", "", "", "", "", "", "", "", "", "", 6571., "", 
  "", "", 169., 26.85, 3.8928341*^7, 54.422, 18.6, 2.581, 1.337, 1803.987, 
  "", 597.029, 9.59, "", "", 37.746, 0.5, 64.83, 0.511}, 
 {"AFG", "Asia", "Afghanistan", "2021-04-13", 57364., 122., 83.571, 2529., 
  0., 2.429, 1473.579, 3.134, 2.147, 64.966, 0., 0.062, 1.37, "", "", "", "", 
  "", "", "", "", "", "", "", "", "", "", "", "", "", "", "", "", "", 7286., 
  "", "", "", 187., 26.85, 3.8928341*^7, 54.422, 18.6, 2.581, 1.337, 
  1803.987, "", 597.029, 9.59, "", "", 37.746, 0.5, 64.83, 0.511}, 
 {"AFG", "Asia", "Afghanistan", "2021-04-14", 57492., 128., 88.429, 2532., 
  3., 2.857, 1476.867, 3.288, 2.272, 65.043, 0.077, 0.073, 1.35, "", "", "", 
  "", "", "", "", "", "", "", "", "", "", "", "", "", "", "", "", "", "", 
  8000., "", "", "", 206., 26.85, 3.8928341*^7, 54.422, 18.6, 2.581, 1.337, 
  1803.987, "", 597.029, 9.59, "", "", 37.746, 0.5, 64.83, 0.511}, 
 {"AFG", "Asia", "Afghanistan", "2021-04-15", 57534., 42., 84.429, 2533., 1., 
  2.429, 1477.946, 1.079, 2.169, 65.068, 0.026, 0.062, 1.34, "", "", "", "", 
  "", "", "", "", "", "", "", "", "", "", "", "", "", "", "", "", "", 8000., 
  "", "", "", 206., 26.85, 3.8928341*^7, 54.422, 18.6, 2.581, 1.337, 
  1803.987, "", 597.029, 9.59, "", "", 37.746, 0.5, 64.83, 0.511}, 
 {"AFG", "Asia", "Afghanistan", "2021-04-16", 57612., 78., 84.714, 2535., 2., 
  2., 1479.95, 2.004, 2.176, 65.12, 0.051, 0.051, 1.34, "", "", "", "", "", 
  "", "", "", "", "", "", "", "", "", "", "", "", "", "", "", "", 8000., "", 
  "", "", 206., 26.85, 3.8928341*^7, 54.422, 18.6, 2.581, 1.337, 1803.987, 
  "", 597.029, 9.59, "", "", 37.746, 0.5, 64.83, 0.511}, 
 {"AFG", "Asia", "Afghanistan", "2021-04-17", 57721., 109., 82.429, 2539., 
  4., 2.571, 1482.75, 2.8, 2.117, 65.222, 0.103, 0.066, 1.35, "", "", "", "", 
  "", "", "", "", "", "", "", "", "", "", "", "", "", "", "", "", "", 8000., 
  "", "", "", 206., 26.85, 3.8928341*^7, 54.422, 18.6, 2.581, 1.337, 
  1803.987, "", 597.029, 9.59, "", "", 37.746, 0.5, 64.83, 0.511}, 
 {"AFG", "Asia", "Afghanistan", "2021-04-18", 57793., 72., 90.429, 2539., 0., 
  2.571, 1484.6, 1.85, 2.323, 65.222, 0., 0.066, 1.36, "", "", "", "", "", 
  "", "", "", "", "", "", "", "", "", "", "", "", "", "", "", "", 8000., "", 
  "", "", 206., 26.85, 3.8928341*^7, 54.422, 18.6, 2.581, 1.337, 1803.987, 
  "", 597.029, 9.59, "", "", 37.746, 0.5, 64.83, 0.511}, 
 {"AFG", "Asia", "Afghanistan", "2021-04-19", 57898., 105., 93.714, 2546., 
  7., 2.429, 1487.297, 2.697, 2.407, 65.402, 0.18, 0.062, 1.37, "", "", "", 
  "", "", "", "", "", "", "", "", "", "", "", "", "", "", "", "", "", "", 
  8000., "", "", "", 206., 26.85, 3.8928341*^7, 54.422, 18.6, 2.581, 1.337, 
  1803.987, "", 597.029, 9.59, "", "", 37.746, 0.5, 64.83, 0.511}, 
 {"AFG", "Asia", "Afghanistan", "2021-04-20", 58037., 139., 96.143, 2549., 
  3., 2.857, 1490.868, 3.571, 2.47, 65.479, 0.077, 0.073, 1.38, "", "", "", 
  "", "", "", "", "", "", "", "", "", "", "", "", "", "", "", "", "", "", 
  8000., "", "", "", 206., 26.85, 3.8928341*^7, 54.422, 18.6, 2.581, 1.337, 
  1803.987, "", 597.029, 9.59, "", "", 37.746, 0.5, 64.83, 0.511}, 
 {"AFG", "Asia", "Afghanistan", "2021-04-21", 58214., 177., 103.143, 2557., 
  8., 3.571, 1495.414, 4.547, 2.65, 65.685, 0.206, 0.092, 1.38, "", "", "", 
  "", "", "", "", "", "", "", "", "", "", "", "", "", "", "", "", "", "", 
  8000., "", "", "", 206., 26.85, 3.8928341*^7, 54.422, 18.6, 2.581, 1.337, 
  1803.987, "", 597.029, 9.59, "", "", 37.746, 0.5, 64.83, 0.511}, 
 {"AFG", "Asia", "Afghanistan", "2021-04-22", 58312., 98., 111.143, 2561., 
  4., 4., 1497.932, 2.517, 2.855, 65.788, 0.103, 0.103, 1.38, "", "", "", "", 
  "", "", "", "", "", "", "", "", "", "", "", "", "", 240000., 240000., "", 
  "", 8000., 0.62, 0.62, "", 206., 26.85, 3.8928341*^7, 54.422, 18.6, 2.581, 
  1.337, 1803.987, "", 597.029, 9.59, "", "", 37.746, 0.5, 64.83, 0.511}, 
 {"AFG", "Asia", "Afghanistan", "2021-04-23", 58542., 230., 132.857, 2565., 
  4., 4.286, 1503.84, 5.908, 3.413, 65.89, 0.103, 0.11, 1.39, "", "", "", "", 
  "", "", "", "", "", "", "", "", "", "", "", "", "", "", "", "", "", 8846., 
  "", "", "", 227., 26.85, 3.8928341*^7, 54.422, 18.6, 2.581, 1.337, 
  1803.987, "", 597.029, 9.59, "", "", 37.746, 0.5, 64.83, 0.511}, 
 {"AFG", "Asia", "Afghanistan", "2021-04-24", 58730., 188., 144.143, 2572., 
  7., 4.714, 1508.669, 4.829, 3.703, 66.07, 0.18, 0.121, 1.38, "", "", "", 
  "", "", "", "", "", "", "", "", "", "", "", "", "", "", "", "", "", "", 
  9692., "", "", "", 249., 26.85, 3.8928341*^7, 54.422, 18.6, 2.581, 1.337, 
  1803.987, "", 597.029, 9.59, "", "", 37.746, 0.5, 64.83, 0.511}, 
 {"AFG", "Asia", "Afghanistan", "2021-04-25", 58843., 113., 150., 2582., 10., 
  6.143, 1511.572, 2.903, 3.853, 66.327, 0.257, 0.158, 1.36, "", "", "", "", 
  "", "", "", "", "", "", "", "", "", "", "", "", "", "", "", "", "", 10538., 
  "", "", "", 271., 26.85, 3.8928341*^7, 54.422, 18.6, 2.581, 1.337, 
  1803.987, "", 597.029, 9.59, "", "", 37.746, 0.5, 64.83, 0.511}, 
 {"AFG", "Asia", "Afghanistan", "2021-04-26", 59015., 172., 159.571, 2592., 
  10., 6.571, 1515.991, 4.418, 4.099, 66.584, 0.257, 0.169, 1.35, "", "", "", 
  "", "", "", "", "", "", "", "", "", "", "", "", "", "", "", "", "", "", 
  11384., "", "", "", 292., 26.85, 3.8928341*^7, 54.422, 18.6, 2.581, 1.337, 
  1803.987, "", 597.029, 9.59, "", "", 37.746, 0.5, 64.83, 0.511}, 
 {"AFG", "Asia", "Afghanistan", "2021-04-27", 59225., 210., 169.714, 2598., 
  6., 7., 1521.385, 5.395, 4.36, 66.738, 0.154, 0.18, 1.33, "", "", "", "", 
  "", "", "", "", "", "", "", "", "", "", "", "", "", "", "", "", "", 12229., 
  "", "", "", 314., 26.85, 3.8928341*^7, 54.422, 18.6, 2.581, 1.337, 
  1803.987, "", 597.029, 9.59, "", "", 37.746, 0.5, 64.83, 0.511}, 
 {"AFG", "Asia", "Afghanistan", "2021-04-28", 59370., 145., 165.143, 2611., 
  13., 7.714, 1525.11, 3.725, 4.242, 67.072, 0.334, 0.198, 1.31, "", "", "", 
  "", "", "", "", "", "", "", "", "", "", "", "", "", "", "", "", "", "", 
  13075., "", "", "", 336., 26.85, 3.8928341*^7, 54.422, 18.6, 2.581, 1.337, 
  1803.987, "", 597.029, 9.59, "", "", 37.746, 0.5, 64.83, 0.511}, 
 {"AFG", "Asia", "Afghanistan", "2021-04-29", 59576., 206., 180.571, 2618., 
  7., 8.143, 1530.402, 5.292, 4.639, 67.252, 0.18, 0.209, 1.31, "", "", "", 
  "", "", "", "", "", "", "", "", "", "", "", "", "", "", "", "", "", "", 
  13921., "", "", "", 358., 26.85, 3.8928341*^7, 54.422, 18.6, 2.581, 1.337, 
  1803.987, "", 597.029, 9.59, "", "", 37.746, 0.5, 64.83, 0.511}, 
 {"AFG", "Asia", "Afghanistan", "2021-04-30", 59745., 169., 171.857, 2625., 
  7., 8.571, 1534.743, 4.341, 4.415, 67.432, 0.18, 0.22, 1.3, "", "", "", "", 
  "", "", "", "", "", "", "", "", "", "", "", "", "", "", "", "", "", 13921., 
  "", "", "", 358., 26.85, 3.8928341*^7, 54.422, 18.6, 2.581, 1.337, 
  1803.987, "", 597.029, 9.59, "", "", 37.746, 0.5, 64.83, 0.511}, 
 {"AFG", "Asia", "Afghanistan", "2021-05-01", 59939., 194., 172.714, 2631., 
  6., 8.429, 1539.727, 4.984, 4.437, 67.586, 0.154, 0.217, 1.3, "", "", "", 
  "", "", "", "", "", "", "", "", "", "", "", "", "", "", "", "", "", "", 
  13921., "", "", "", 358., 26.85, 3.8928341*^7, 54.422, 18.6, 2.581, 1.337, 
  1803.987, "", 597.029, 9.59, "", "", 37.746, 0.5, 64.83, 0.511}, 
 {"AFG", "Asia", "Afghanistan", "2021-05-02", 60122., 183., 182.714, 2637., 
  6., 7.857, 1544.427, 4.701, 4.694, 67.74, 0.154, 0.202, 1.31, "", "", "", 
  "", "", "", "", "", "", "", "", "", "", "", "", "", "", "", "", "", "", 
  13921., "", "", "", 358., 26.85, 3.8928341*^7, 54.422, 18.6, 2.581, 1.337, 
  1803.987, "", 597.029, 9.59, "", "", 37.746, 0.5, 64.83, 0.511}, 
 {"AFG", "Asia", "Afghanistan", "2021-05-03", 60300., 178., 183.571, 2642., 
  5., 7.143, 1549., 4.573, 4.716, 67.868, 0.128, 0.183, 1.3, "", "", "", "", 
  "", "", "", "", "", "", "", "", "", "", "", "", "", "", "", "", "", 13921., 
  "", "", "", 358., 26.85, 3.8928341*^7, 54.422, 18.6, 2.581, 1.337, 
  1803.987, "", 597.029, 9.59, "", "", 37.746, 0.5, 64.83, 0.511}, 
 {"AFG", "Asia", "Afghanistan", "2021-05-04", 60563., 263., 191.143, 2648., 
  6., 7.143, 1555.756, 6.756, 4.91, 68.022, 0.154, 0.183, 1.3, "", "", "", 
  "", "", "", "", "", "", "", "", "", "", "", "", "", "", "", "", "", "", 
  13921., "", "", "", 358., 26.85, 3.8928341*^7, 54.422, 18.6, 2.581, 1.337, 
  1803.987, "", 597.029, 9.59, "", "", 37.746, 0.5, 64.83, 0.511}, 
 {"AFG", "Asia", "Afghanistan", "2021-05-05", 60797., 234., 203.857, 2654., 
  6., 6.143, 1561.767, 6.011, 5.237, 68.177, 0.154, 0.158, 1.29, "", "", "", 
  "", "", "", "", "", "", "", "", "", "", "", "", "", "", "", "", "", "", 
  13921., "", "", "", 358., 26.85, 3.8928341*^7, 54.422, 18.6, 2.581, 1.337, 
  1803.987, "", 597.029, 9.59, "", "", 37.746, 0.5, 64.83, 0.511}, 
 {"AFG", "Asia", "Afghanistan", "2021-05-06", 61162., 365., 226.571, 2664., 
  10., 6.571, 1571.143, 9.376, 5.82, 68.433, 0.257, 0.169, 1.29, "", "", "", 
  "", "", "", "", "", "", "", "", "", "", "", "", "", "", "", "", "", "", 
  13921., "", "", "", 358., 26.85, 3.8928341*^7, 54.422, 18.6, 2.581, 1.337, 
  1803.987, "", 597.029, 9.59, "", "", 37.746, 0.5, 64.83, 0.511}, 
 {"AFG", "Asia", "Afghanistan", "2021-05-07", 61455., 293., 244.286, 2673., 
  9., 6.857, 1578.67, 7.527, 6.275, 68.665, 0.231, 0.176, 1.28, "", "", "", 
  "", "", "", "", "", "", "", "", "", "", "", "", "", "", "", "", "", "", 
  13921., "", "", "", 358., 26.85, 3.8928341*^7, 54.422, 18.6, 2.581, 1.337, 
  1803.987, "", 597.029, 9.59, "", "", 37.746, 0.5, 64.83, 0.511}, 
 {"AFG", "Asia", "Afghanistan", "2021-05-08", 61755., 300., 259.429, 2683., 
  10., 7.429, 1586.376, 7.706, 6.664, 68.922, 0.257, 0.191, 1.26, "", "", "", 
  "", "", "", "", "", "", "", "", "", "", "", "", "", "", "", "", "", "", 
  13921., "", "", "", 358., 26.85, 3.8928341*^7, 54.422, 18.6, 2.581, 1.337, 
  1803.987, "", 597.029, 9.59, "", "", 37.746, 0.5, 64.83, 0.511}, 
 {"AFG", "Asia", "Afghanistan", "2021-05-09", 61842., 87., 245.714, 2686., 
  3., 7., 1588.611, 2.235, 6.312, 68.999, 0.077, 0.18, 1.25, "", "", "", "", 
  "", "", "", "", "", "", "", "", "", "", "", "", "", "", "", "", "", 13921., 
  "", "", "", 358., 26.85, 3.8928341*^7, 54.422, 18.6, 2.581, 1.337, 
  1803.987, "", 597.029, 9.59, "", "", 37.746, 0.5, 64.83, 0.511}, 
 {"AFG", "Asia", "Afghanistan", "2021-05-10", 62063., 221., 251.857, 2698., 
  12., 8., 1594.288, 5.677, 6.47, 69.307, 0.308, 0.206, 1.24, "", "", "", "", 
  "", "", "", "", "", "", "", "", "", "", "", "", "", "", "", "", "", 13921., 
  "", "", "", 358., 26.85, 3.8928341*^7, 54.422, 18.6, 2.581, 1.337, 
  1803.987, "", 597.029, 9.59, "", "", 37.746, 0.5, 64.83, 0.511}, 
 {"AFG", "Asia", "Afghanistan", "2021-05-11", 62403., 340., 262.857, 2710., 
  12., 8.857, 1603.022, 8.734, 6.752, 69.615, 0.308, 0.228, 1.23, "", "", "", 
  "", "", "", "", "", "", "", "", "", "", "", "", "", "", 504502., 448878., 
  55624., "", 13921., 1.3, 1.15, 0.14, 358., 26.85, 3.8928341*^7, 54.422, 
  18.6, 2.581, 1.337, 1803.987, "", 597.029, 9.59, "", "", 37.746, 0.5, 
  64.83, 0.511}, {"AFG", "Asia", "Afghanistan", "2021-05-12", 62718., 315., 
  274.429, 2713., 3., 8.429, 1611.114, 8.092, 7.05, 69.692, 0.077, 0.217, 
  1.23, "", "", "", "", "", "", "", "", "", "", "", "", "", "", "", "", "", 
  "", "", "", "", 12621., "", "", "", 324., 26.85, 3.8928341*^7, 54.422, 
  18.6, 2.581, 1.337, 1803.987, "", 597.029, 9.59, "", "", 37.746, 0.5, 
  64.83, 0.511}, {"AFG", "Asia", "Afghanistan", "2021-05-13", 63045., 327., 
  269., 2721., 8., 8.143, 1619.514, 8.4, 6.91, 69.898, 0.206, 0.209, 1.22, 
  "", "", "", "", "", "", "", "", "", "", "", "", "", "", "", "", "", "", "", 
  "", "", 11321., "", "", "", 291., 26.85, 3.8928341*^7, 54.422, 18.6, 2.581, 
  1.337, 1803.987, "", 597.029, 9.59, "", "", 37.746, 0.5, 64.83, 0.511}, 
 {"AFG", "Asia", "Afghanistan", "2021-05-14", 63355., 310., 271.429, 2730., 
  9., 8.143, 1627.478, 7.963, 6.973, 70.129, 0.231, 0.209, 1.21, "", "", "", 
  "", "", "", "", "", "", "", "", "", "", "", "", "", "", "", "", "", "", 
  10022., "", "", "", 257., 26.85, 3.8928341*^7, 54.422, 18.6, 2.581, 1.337, 
  1803.987, "", 597.029, 9.59, "", "", 37.746, 0.5, 64.83, 0.511}, 
 {"AFG", "Asia", "Afghanistan", "2021-05-15", 63412., 57., 236.714, 2733., 
  3., 7.143, 1628.942, 1.464, 6.081, 70.206, 0.077, 0.183, 1.21, "", "", "", 
  "", "", "", "", "", "", "", "", "", "", "", "", "", "", "", "", "", "", 
  8722., "", "", "", 224., 26.85, 3.8928341*^7, 54.422, 18.6, 2.581, 1.337, 
  1803.987, "", 597.029, 9.59, "", "", 37.746, 0.5, 64.83, 0.511}, 
 {"AFG", "Asia", "Afghanistan", "2021-05-16", 63484., 72., 234.571, 2742., 
  9., 8., 1630.791, 1.85, 6.026, 70.437, 0.231, 0.206, 1.22, "", "", "", "", 
  "", "", "", "", "", "", "", "", "", "", "", "", "", "", "", "", "", 7422., 
  "", "", "", 191., 26.85, 3.8928341*^7, 54.422, 18.6, 2.581, 1.337, 
  1803.987, "", 597.029, 9.59, "", "", 37.746, 0.5, 64.83, 0.511}, 
 {"AFG", "Asia", "Afghanistan", "2021-05-17", 63598., 114., 219.286, 2745., 
  3., 6.714, 1633.72, 2.928, 5.633, 70.514, 0.077, 0.172, 1.25, "", "", "", 
  "", "", "", "", "", "", "", "", "", "", "", "", "", "", "", "", "", "", 
  6122., "", "", "", 157., 26.85, 3.8928341*^7, 54.422, 18.6, 2.581, 1.337, 
  1803.987, "", 597.029, 9.59, "", "", 37.746, 0.5, 64.83, 0.511}, 
 {"AFG", "Asia", "Afghanistan", "2021-05-18", 63819., 221., 202.286, 2751., 
  6., 5.857, 1639.397, 5.677, 5.196, 70.668, 0.154, 0.15, 1.29, "", "", "", 
  "", "", "", "", "", "", "", "", "", "", "", "", "", "", "", "", "", "", 
  4822., "", "", "", 124., 26.85, 3.8928341*^7, 54.422, 18.6, 2.581, 1.337, 
  1803.987, "", 597.029, 9.59, "", "", 37.746, 0.5, 64.83, 0.511}, 
 {"AFG", "Asia", "Afghanistan", "2021-05-19", 64122., 303., 200.571, 2762., 
  11., 7., 1647.18, 7.784, 5.152, 70.951, 0.283, 0.18, 1.34, "", "", "", "", 
  "", "", "", "", "", "", "", "", "", "", "", "", "", "", "", "", "", 4822., 
  "", "", "", 124., 26.85, 3.8928341*^7, 54.422, 18.6, 2.581, 1.337, 
  1803.987, "", 597.029, 9.59, "", "", 37.746, 0.5, 64.83, 0.511}, 
 {"AFG", "Asia", "Afghanistan", "2021-05-20", 64575., 453., 218.571, 2772., 
  10., 7.286, 1658.817, 11.637, 5.615, 71.208, 0.257, 0.187, 1.39, "", "", 
  "", "", "", "", "", "", "", "", "", "", "", "", "", "", "", 547901., 
  470341., 77560., "", 4822., 1.41, 1.21, 0.2, 124., 26.85, 3.8928341*^7, 
  54.422, 18.6, 2.581, 1.337, 1803.987, "", 597.029, 9.59, "", "", 37.746, 
  0.5, 64.83, 0.511}, {"AFG", "Asia", "Afghanistan", "2021-05-21", 65080., 
  505., 246.429, 2782., 10., 7.429, 1671.79, 12.973, 6.33, 71.465, 0.257, 
  0.191, 1.43, "", "", "", "", "", "", "", "", "", "", "", "", "", "", "", 
  "", "", "", "", "", "", 5040., "", "", "", 129., 26.85, 3.8928341*^7, 
  54.422, 18.6, 2.581, 1.337, 1803.987, "", 597.029, 9.59, "", "", 37.746, 
  0.5, 64.83, 0.511}, {"AFG", "Asia", "Afghanistan", "2021-05-22", 65486., 
  406., 296.286, 2792., 10., 8.429, 1682.219, 10.429, 7.611, 71.722, 0.257, 
  0.217, 1.46, "", "", "", "", "", "", "", "", "", "", "", "", "", "", "", 
  "", "", "", "", "", "", 5257., "", "", "", 135., 26.85, 3.8928341*^7, 
  54.422, 18.6, 2.581, 1.337, 1803.987, "", 597.029, 9.59, "", "", 37.746, 
  0.5, 64.83, 0.511}, {"AFG", "Asia", "Afghanistan", "2021-05-23", 65728., 
  242., 320.571, 2802., 10., 8.571, 1688.436, 6.217, 8.235, 71.978, 0.257, 
  0.22, 1.48, "", "", "", "", "", "", "", "", "", "", "", "", "", "", "", "", 
  "", "", "", "", "", 5474., "", "", "", 141., 54.63, 3.8928341*^7, 54.422, 
  18.6, 2.581, 1.337, 1803.987, "", 597.029, 9.59, "", "", 37.746, 0.5, 
  64.83, 0.511}, {"AFG", "Asia", "Afghanistan", "2021-05-24", 66275., 547., 
  382.429, 2812., 10., 9.571, 1702.487, 14.051, 9.824, 72.235, 0.257, 0.246, 
  1.51, "", "", "", "", "", "", "", "", "", "", "", "", "", "", "", "", "", 
  573277., 476367., 96910., "", 5692., 1.47, 1.22, 0.25, 146., 54.63, 
  3.8928341*^7, 54.422, 18.6, 2.581, 1.337, 1803.987, "", 597.029, 9.59, "", 
  "", 37.746, 0.5, 64.83, 0.511}, {"AFG", "Asia", "Afghanistan", 
  "2021-05-25", 66903., 628., 440.571, 2836., 24., 12.143, 1718.619, 16.132, 
  11.317, 72.852, 0.617, 0.312, 1.53, "", "", "", "", "", "", "", "", "", "", 
  "", "", "", "", "", "", "", "", "", "", "", 6230., "", "", "", 160., "", 
  3.8928341*^7, 54.422, 18.6, 2.581, 1.337, 1803.987, "", 597.029, 9.59, "", 
  "", 37.746, 0.5, 64.83, 0.511}, {"AFG", "Asia", "Afghanistan", 
  "2021-05-26", 67743., 840., 517.286, 2855., 19., 13.286, 1740.197, 21.578, 
  13.288, 73.34, 0.488, 0.341, 1.55, "", "", "", "", "", "", "", "", "", "", 
  "", "", "", "", "", "", "", 590454., 479372., 111082., "", 6768., 1.52, 
  1.23, 0.29, 174., "", 3.8928341*^7, 54.422, 18.6, 2.581, 1.337, 1803.987, 
  "", 597.029, 9.59, "", "", 37.746, 0.5, 64.83, 0.511}, 
 {"AFG", "Asia", "Afghanistan", "2021-05-27", 68366., 623., 541.571, 2869., 
  14., 13.857, 1756.201, 16.004, 13.912, 73.7, 0.36, 0.356, 1.55, "", "", "", 
  "", "", "", "", "", "", "", "", "", "", "", "", "", "", 593313., 479574., 
  113739., 2859., 6487., 1.52, 1.23, 0.29, 167., "", 3.8928341*^7, 54.422, 
  18.6, 2.581, 1.337, 1803.987, "", 597.029, 9.59, "", "", 37.746, 0.5, 
  64.83, 0.511}, {"AFG", "Asia", "Afghanistan", "2021-05-28", 69130., 764., 
  578.571, 2881., 12., 14.143, 1775.827, 19.626, 14.862, 74.008, 0.308, 
  0.363, 1.56, "", "", "", "", "", "", "", "", "", "", "", "", "", "", "", 
  "", "", "", "", "", "", 5907., "", "", "", 152., "", 3.8928341*^7, 54.422, 
  18.6, 2.581, 1.337, 1803.987, "", 597.029, 9.59, "", "", 37.746, 0.5, 
  64.83, 0.511}, {"AFG", "Asia", "Afghanistan", "2021-05-29", 70111., 981., 
  660.714, 2899., 18., 15.286, 1801.027, 25.2, 16.973, 74.47, 0.462, 0.393, 
  1.57, "", "", "", "", "", "", "", "", "", "", "", "", "", "", "", "", "", 
  "", "", "", "", 5326., "", "", "", 137., 37.96, 3.8928341*^7, 54.422, 18.6, 
  2.581, 1.337, 1803.987, "", 597.029, 9.59, "", "", 37.746, 0.5, 64.83, 
  0.511}, {"AFG", "Asia", "Afghanistan", "2021-05-30", 70761., 650., 719., 
  2919., 20., 16.714, 1817.725, 16.697, 18.47, 74.984, 0.514, 0.429, 1.58, 
  "", "", "", "", "", "", "", "", "", "", "", "", "", "", "", "", "", 
  600152., 480226., 119926., "", 4746., 1.54, 1.23, 0.31, 122., 37.96, 
  3.8928341*^7, 54.422, 18.6, 2.581, 1.337, 1803.987, "", 597.029, 9.59, "", 
  "", 37.746, 0.5, 64.83, 0.511}, {"AFG", "Asia", "Afghanistan", 
  "2021-05-31", 71838., 1077., 794.714, 2944., 25., 18.857, 1845.391, 27.666, 
  20.415, 75.626, 0.642, 0.484, 1.58, "", "", "", "", "", "", "", "", "", "", 
  "", "", "", "", "", "", "", "", "", "", "", 5084., "", "", "", 131., "", 
  3.8928341*^7, 54.422, 18.6, 2.581, 1.337, 1803.987, "", 597.029, 9.59, "", 
  "", 37.746, 0.5, 64.83, 0.511}, {"AFG", "Asia", "Afghanistan", 
  "2021-06-01", 72977., 1139., 867.714, 2973., 29., 19.571, 1874.65, 29.259, 
  22.29, 76.371, 0.745, 0.503, 1.57, "", "", "", "", "", "", "", "", "", "", 
  "", "", "", "", "", "", "", "", "", "", "", 5102., "", "", "", 131., "", 
  3.8928341*^7, 54.422, 18.6, 2.581, 1.337, 1803.987, "", 597.029, 9.59, "", 
  "", 37.746, 0.5, 64.83, 0.511}, {"AFG", "Asia", "Afghanistan", 
  "2021-06-02", 74026., 1049., 897.571, 3007., 34., 21.714, 1901.597, 26.947, 
  23.057, 77.244, 0.873, 0.558, 1.56, "", "", "", "", "", "", "", "", "", "", 
  "", "", "", "", "", "", "", 626290., 481690., 144600., "", 5119., 1.61, 
  1.24, 0.37, 131., "", 3.8928341*^7, 54.422, 18.6, 2.581, 1.337, 1803.987, 
  "", 597.029, 9.59, "", "", 37.746, 0.5, 64.83, 0.511}, 
 {"AFG", "Asia", "Afghanistan", "2021-06-03", 75119., 1093., 964.714, 3034., 
  27., 23.571, 1929.674, 28.077, 24.782, 77.938, 0.694, 0.606, 1.56, "", "", 
  "", "", "", "", "", "", "", "", "", "", "", "", "", "", "", 630305., 
  481800., 148505., 4015., 5285., 1.62, 1.24, 0.38, 136., "", 3.8928341*^7, 
  54.422, 18.6, 2.581, 1.337, 1803.987, "", 597.029, 9.59, "", "", 37.746, 
  0.5, 64.83, 0.511}, {"AFG", "Asia", "Afghanistan", "2021-06-04", 76628., 
  1509., 1071.143, 3068., 34., 26.714, 1968.437, 38.764, 27.516, 78.811, 
  0.873, 0.686, 1.57, "", "", "", "", "", "", "", "", "", "", "", "", "", "", 
  "", "", "", "", "", "", "", "", "", "", "", "", "", 3.8928341*^7, 54.422, 
  18.6, 2.581, 1.337, 1803.987, "", 597.029, 9.59, "", "", 37.746, 0.5, 
  64.83, 0.511}, {"AFG", "Asia", "Afghanistan", "2021-06-05", 77963., 1335., 
  1121.714, 3104., 36., 29.286, 2002.731, 34.294, 28.815, 79.736, 0.925, 
  0.752, 1.57, "", "", "", "", "", "", "", "", "", "", "", "", "", "", "", 
  "", "", "", "", "", "", "", "", "", "", "", "", 3.8928341*^7, 54.422, 18.6, 
  2.581, 1.337, 1803.987, "", 597.029, 9.59, "", "", 37.746, 0.5, 64.83, 
  0.511}, {"AFG", "Asia", "Afghanistan", "2021-06-06", 79224., 1261., 1209., 
  3145., 41., 32.286, 2035.124, 32.393, 31.057, 80.789, 1.053, 0.829, 1.58, 
  "", "", "", "", "", "", "", "", "", "", "", "", "", "", "", "", "", "", "", 
  "", "", "", "", "", "", "", "", 3.8928341*^7, 54.422, 18.6, 2.581, 1.337, 
  1803.987, "", 597.029, 9.59, "", "", 37.746, 0.5, 64.83, 0.511}, 
 {"AFG", "Asia", "Afghanistan", "2021-06-07", 80841., 1617., 1286.143, 3187., 
  42., 34.714, 2076.662, 41.538, 33.039, 81.868, 1.079, 0.892, "", "", "", 
  "", "", "", "", "", "", "", "", "", "", "", "", "", "", "", "", "", "", "", 
  "", "", "", "", "", "", 3.8928341*^7, 54.422, 18.6, 2.581, 1.337, 1803.987, 
  "", 597.029, 9.59, "", "", 37.746, 0.5, 64.83, 0.511}, 
 {"OWID_AFR", "", "Africa", "2020-02-13", "", 0., "", "", 0., "", "", 0., "", 
  "", 0., "", "", "", "", "", "", "", "", "", "", "", "", "", "", "", "", "", 
  "", "", "", "", "", "", "", "", "", "", "", "", 1.340598113*^9, "", "", "", 
  "", "", "", "", "", "", "", "", "", "", ""}, 
 {"OWID_AFR", "", "Africa", "2020-02-14", 1., 1., "", "", 0., "", 0.001, 
  0.001, "", "", 0., "", "", "", "", "", "", "", "", "", "", "", "", "", "", 
  "", "", "", "", "", "", "", "", "", "", "", "", "", "", "", 1.340598113*^9, 
  "", "", "", "", "", "", "", "", "", "", "", "", "", ""}, 
 {"OWID_AFR", "", "Africa", "2020-02-15", 1., 0., "", "", 0., "", 0.001, 0., 
  "", "", 0., "", "", "", "", "", "", "", "", "", "", "", "", "", "", "", "", 
  "", "", "", "", "", "", "", "", "", "", "", "", "", 1.340598113*^9, "", "", 
  "", "", "", "", "", "", "", "", "", "", "", ""}, 
 {"OWID_AFR", "", "Africa", "2020-02-16", 1., 0., "", "", 0., "", 0.001, 0., 
  "", "", 0., "", "", "", "", "", "", "", "", "", "", "", "", "", "", "", "", 
  "", "", "", "", "", "", "", "", "", "", "", "", "", 1.340598113*^9, "", "", 
  "", "", "", "", "", "", "", "", "", "", "", ""}, 
 {"OWID_AFR", "", "Africa", "2020-02-17", 1., 0., "", "", 0., "", 0.001, 0., 
  "", "", 0., "", "", "", "", "", "", "", "", "", "", "", "", "", "", "", "", 
  "", "", "", "", "", "", "", "", "", "", "", "", "", 1.340598113*^9, "", "", 
  "", "", "", "", "", "", "", "", "", "", "", ""}, 
 {"OWID_AFR", "", "Africa", "2020-02-18", 1., 0., "", "", 0., "", 0.001, 0., 
  "", "", 0., "", "", "", "", "", "", "", "", "", "", "", "", "", "", "", "", 
  "", "", "", "", "", "", "", "", "", "", "", "", "", 1.340598113*^9, "", "", 
  "", "", "", "", "", "", "", "", "", "", "", ""}, 
 {"OWID_AFR", "", "Africa", "2020-02-19", 1., 0., 0.143, "", 0., 0., 0.001, 
  0., 0., "", 0., 0., "", "", "", "", "", "", "", "", "", "", "", "", "", "", 
  "", "", "", "", "", "", "", "", "", "", "", "", "", "", 1.340598113*^9, "", 
  "", "", "", "", "", "", "", "", "", "", "", "", ""}, 
 {"OWID_AFR", "", "Africa", "2020-02-20", 1., 0., 0.143, "", 0., 0., 0.001, 
  0., 0., "", 0., 0., "", "", "", "", "", "", "", "", "", "", "", "", "", "", 
  "", "", "", "", "", "", "", "", "", "", "", "", "", "", 1.340598113*^9, "", 
  "", "", "", "", "", "", "", "", "", "", "", "", ""}, 
 {"OWID_AFR", "", "Africa", "2020-02-21", 1., 0., 0., "", 0., 0., 0.001, 0., 
  0., "", 0., 0., "", "", "", "", "", "", "", "", "", "", "", "", "", "", "", 
  "", "", "", "", "", "", "", "", "", "", "", "", "", 1.340598113*^9, "", "", 
  "", "", "", "", "", "", "", "", "", "", "", ""}, 
 {"OWID_AFR", "", "Africa", "2020-02-22", 1., 0., 0., "", 0., 0., 0.001, 0., 
  0., "", 0., 0., "", "", "", "", "", "", "", "", "", "", "", "", "", "", "", 
  "", "", "", "", "", "", "", "", "", "", "", "", "", 1.340598113*^9, "", "", 
  "", "", "", "", "", "", "", "", "", "", "", ""}, 
 {"OWID_AFR", "", "Africa", "2020-02-23", 1., 0., 0., "", 0., 0., 0.001, 0., 
  0., "", 0., 0., "", "", "", "", "", "", "", "", "", "", "", "", "", "", "", 
  "", "", "", "", "", "", "", "", "", "", "", "", "", 1.340598113*^9, "", "", 
  "", "", "", "", "", "", "", "", "", "", "", ""}, 
 {"OWID_AFR", "", "Africa", "2020-02-24", 1., 0., 0., "", 0., 0., 0.001, 0., 
  0., "", 0., 0., "", "", "", "", "", "", "", "", "", "", "", "", "", "", "", 
  "", "", "", "", "", "", "", "", "", "", "", "", "", 1.340598113*^9, "", "", 
  "", "", "", "", "", "", "", "", "", "", "", ""}, 
 {"OWID_AFR", "", "Africa", "2020-02-25", 2., 1., 0.143, "", 0., 0., 0.001, 
  0.001, 0., "", 0., 0., "", "", "", "", "", "", "", "", "", "", "", "", "", 
  "", "", "", "", "", "", "", "", "", "", "", "", "", "", "", 1.340598113*^9, 
  "", "", "", "", "", "", "", "", "", "", "", "", "", ""}, 
 {"OWID_AFR", "", "Africa", "2020-02-26", 2., 0., 0.143, "", 0., 0., 0.001, 
  0., 0., "", 0., 0., "", "", "", "", "", "", "", "", "", "", "", "", "", "", 
  "", "", "", "", "", "", "", "", "", "", "", "", "", "", 1.340598113*^9, "", 
  "", "", "", "", "", "", "", "", "", "", "", "", ""}, 
 {"OWID_AFR", "", "Africa", "2020-02-27", 2., 0., 0.143, "", 0., 0., 0.001, 
  0., 0., "", 0., 0., "", "", "", "", "", "", "", "", "", "", "", "", "", "", 
  "", "", "", "", "", "", "", "", "", "", "", "", "", "", 1.340598113*^9, "", 
  "", "", "", "", "", "", "", "", "", "", "", "", ""}, 
 {"OWID_AFR", "", "Africa", "2020-02-28", 3., 1., 0.286, "", 0., 0., 0.002, 
  0.001, 0., "", 0., 0., "", "", "", "", "", "", "", "", "", "", "", "", "", 
  "", "", "", "", "", "", "", "", "", "", "", "", "", "", "", 1.340598113*^9, 
  "", "", "", "", "", "", "", "", "", "", "", "", "", ""}, 
 {"OWID_AFR", "", "Africa", "2020-02-29", 3., 0., 0.286, "", 0., 0., 0.002, 
  0., 0., "", 0., 0., "", "", "", "", "", "", "", "", "", "", "", "", "", "", 
  "", "", "", "", "", "", "", "", "", "", "", "", "", "", 1.340598113*^9, "", 
  "", "", "", "", "", "", "", "", "", "", "", "", ""}, 
 {"OWID_AFR", "", "Africa", "2020-03-01", 4., 1., 0.429, "", 0., 0., 0.003, 
  0.001, 0., "", 0., 0., "", "", "", "", "", "", "", "", "", "", "", "", "", 
  "", "", "", "", "", "", "", "", "", "", "", "", "", "", "", 1.340598113*^9, 
  "", "", "", "", "", "", "", "", "", "", "", "", "", ""}, 
 {"OWID_AFR", "", "Africa", "2020-03-02", 8., 4., 1., "", 0., 0., 0.006, 
  0.003, 0.001, "", 0., 0., "", "", "", "", "", "", "", "", "", "", "", "", 
  "", "", "", "", "", "", "", "", "", "", "", "", "", "", "", "", 
  1.340598113*^9, "", "", "", "", "", "", "", "", "", "", "", "", "", ""}, 
 {"OWID_AFR", "", "Africa", "2020-03-03", 11., 3., 1.286, "", 0., 0., 0.008, 
  0.002, 0.001, "", 0., 0., "", "", "", "", "", "", "", "", "", "", "", "", 
  "", "", "", "", "", "", "", "", "", "", "", "", "", "", "", "", 
  1.340598113*^9, "", "", "", "", "", "", "", "", "", "", "", "", "", ""}, 
 {"OWID_AFR", "", "Africa", "2020-03-04", 21., 10., 2.714, "", 0., 0., 0.016, 
  0.007, 0.002, "", 0., 0., "", "", "", "", "", "", "", "", "", "", "", "", 
  "", "", "", "", "", "", "", "", "", "", "", "", "", "", "", "", 
  1.340598113*^9, "", "", "", "", "", "", "", "", "", "", "", "", "", ""}, 
 {"OWID_AFR", "", "Africa", "2020-03-05", 24., 3., 3.143, "", 0., 0., 0.018, 
  0.002, 0.002, "", 0., 0., "", "", "", "", "", "", "", "", "", "", "", "", 
  "", "", "", "", "", "", "", "", "", "", "", "", "", "", "", "", 
  1.340598113*^9, "", "", "", "", "", "", "", "", "", "", "", "", "", ""}, 
 {"OWID_AFR", "", "Africa", "2020-03-06", 43., 19., 5.714, "", 0., 0., 0.032, 
  0.014, 0.004, "", 0., 0., "", "", "", "", "", "", "", "", "", "", "", "", 
  "", "", "", "", "", "", "", "", "", "", "", "", "", "", "", "", 
  1.340598113*^9, "", "", "", "", "", "", "", "", "", "", "", "", "", ""}, 
 {"OWID_AFR", "", "Africa", "2020-03-07", 43., 0., 5.714, "", 0., 0., 0.032, 
  0., 0.004, "", 0., 0., "", "", "", "", "", "", "", "", "", "", "", "", "", 
  "", "", "", "", "", "", "", "", "", "", "", "", "", "", "", 1.340598113*^9, 
  "", "", "", "", "", "", "", "", "", "", "", "", "", ""}, 
 {"OWID_AFR", "", "Africa", "2020-03-08", 83., 40., 11.286, 1., 1., 0.143, 
  0.062, 0.03, 0.008, 0.001, 0.001, 0., "", "", "", "", "", "", "", "", "", 
  "", "", "", "", "", "", "", "", "", "", "", "", "", "", "", "", "", "", "", 
  1.340598113*^9, "", "", "", "", "", "", "", "", "", "", "", "", "", ""}, 
 {"OWID_AFR", "", "Africa", "2020-03-09", 91., 8., 11.857, 1., 0., 0.143, 
  0.068, 0.006, 0.009, 0.001, 0., 0., "", "", "", "", "", "", "", "", "", "", 
  "", "", "", "", "", "", "", "", "", "", "", "", "", "", "", "", "", "", 
  1.340598113*^9, "", "", "", "", "", "", "", "", "", "", "", "", "", ""}, 
 {"OWID_AFR", "", "Africa", "2020-03-10", 104., 13., 13.286, 2., 1., 0.286, 
  0.078, 0.01, 0.01, 0.001, 0.001, 0., "", "", "", "", "", "", "", "", "", 
  "", "", "", "", "", "", "", "", "", "", "", "", "", "", "", "", "", "", "", 
  1.340598113*^9, "", "", "", "", "", "", "", "", "", "", "", "", "", ""}, 
 {"OWID_AFR", "", "Africa", "2020-03-11", 118., 14., 13.857, 2., 0., 0.286, 
  0.088, 0.01, 0.01, 0.001, 0., 0., "", "", "", "", "", "", "", "", "", "", 
  "", "", "", "", "", "", "", "", "", "", "", "", "", "", "", "", "", "", 
  1.340598113*^9, "", "", "", "", "", "", "", "", "", "", "", "", "", ""}, 
 {"OWID_AFR", "", "Africa", "2020-03-12", 134., 16., 15.714, 3., 1., 0.429, 
  0.1, 0.012, 0.012, 0.002, 0.001, 0., "", "", "", "", "", "", "", "", "", 
  "", "", "", "", "", "", "", "", "", "", "", "", "", "", "", "", "", "", "", 
  1.340598113*^9, "", "", "", "", "", "", "", "", "", "", "", "", "", ""}, 
 {"OWID_AFR", "", "Africa", "2020-03-13", 176., 42., 19., 6., 3., 0.857, 
  0.131, 0.031, 0.014, 0.004, 0.002, 0.001, "", "", "", "", "", "", "", "", 
  "", "", "", "", "", "", "", "", "", "", "", "", "", "", "", "", "", "", "", 
  "", 1.340598113*^9, "", "", "", "", "", "", "", "", "", "", "", "", "", 
  ""}, {"OWID_AFR", "", "Africa", "2020-03-14", 254., 78., 30.143, 7., 1., 
  1., 0.189, 0.058, 0.022, 0.005, 0.001, 0.001, "", "", "", "", "", "", "", 
  "", "", "", "", "", "", "", "", "", "", "", "", "", "", "", "", "", "", "", 
  "", "", 1.340598113*^9, "", "", "", "", "", "", "", "", "", "", "", "", "", 
  ""}, {"OWID_AFR", "", "Africa", "2020-03-15", 313., 59., 32.857, 8., 1., 
  1., 0.233, 0.044, 0.025, 0.006, 0.001, 0.001, "", "", "", "", "", "", "", 
  "", "", "", "", "", "", "", "", "", "", "", "", "", "", "", "", "", "", "", 
  "", "", 1.340598113*^9, "", "", "", "", "", "", "", "", "", "", "", "", "", 
  ""}, {"OWID_AFR", "", "Africa", "2020-03-16", 400., 87., 44.143, 8., 0., 
  1., 0.298, 0.065, 0.033, 0.006, 0., 0.001, "", "", "", "", "", "", "", "", 
  "", "", "", "", "", "", "", "", "", "", "", "", "", "", "", "", "", "", "", 
  "", 1.340598113*^9, "", "", "", "", "", "", "", "", "", "", "", "", "", 
  ""}, {"OWID_AFR", "", "Africa", "2020-03-17", 484., 84., 54.286, 11., 3., 
  1.286, 0.361, 0.063, 0.04, 0.008, 0.002, 0.001, "", "", "", "", "", "", "", 
  "", "", "", "", "", "", "", "", "", "", "", "", "", "", "", "", "", "", "", 
  "", "", 1.340598113*^9, "", "", "", "", "", "", "", "", "", "", "", "", "", 
  ""}, {"OWID_AFR", "", "Africa", "2020-03-18", 600., 116., 68.857, 17., 6., 
  2.143, 0.448, 0.087, 0.051, 0.013, 0.004, 0.002, "", "", "", "", "", "", 
  "", "", "", "", "", "", "", "", "", "", "", "", "", "", "", "", "", "", "", 
  "", "", "", 1.340598113*^9, "", "", "", "", "", "", "", "", "", "", "", "", 
  "", ""}, {"OWID_AFR", "", "Africa", "2020-03-19", 780., 180., 92.286, 20., 
  3., 2.429, 0.582, 0.134, 0.069, 0.015, 0.002, 0.002, "", "", "", "", "", 
  "", "", "", "", "", "", "", "", "", "", "", "", "", "", "", "", "", "", "", 
  "", "", "", "", 1.340598113*^9, "", "", "", "", "", "", "", "", "", "", "", 
  "", "", ""}, {"OWID_AFR", "", "Africa", "2020-03-20", 968., 188., 113.143, 
  26., 6., 2.857, 0.722, 0.14, 0.084, 0.019, 0.004, 0.002, "", "", "", "", 
  "", "", "", "", "", "", "", "", "", "", "", "", "", "", "", "", "", "", "", 
  "", "", "", "", "", 1.340598113*^9, "", "", "", "", "", "", "", "", "", "", 
  "", "", "", ""}, {"OWID_AFR", "", "Africa", "2020-03-21", 1172., 204., 
  131.143, 36., 10., 4.143, 0.874, 0.152, 0.098, 0.027, 0.007, 0.003, "", "", 
  "", "", "", "", "", "", "", "", "", "", "", "", "", "", "", "", "", "", "", 
  "", "", "", "", "", "", "", 1.340598113*^9, "", "", "", "", "", "", "", "", 
  "", "", "", "", "", ""}, {"OWID_AFR", "", "Africa", "2020-03-22", 1437., 
  265., 160.571, 48., 12., 5.714, 1.072, 0.198, 0.12, 0.036, 0.009, 0.004, 
  "", "", "", "", "", "", "", "", "", "", "", "", "", "", "", "", "", "", "", 
  "", "", "", "", "", "", "", "", "", 1.340598113*^9, "", "", "", "", "", "", 
  "", "", "", "", "", "", "", ""}, {"OWID_AFR", "", "Africa", "2020-03-23", 
  1818., 381., 202.571, 57., 9., 7., 1.356, 0.284, 0.151, 0.043, 0.007, 
  0.005, "", "", "", "", "", "", "", "", "", "", "", "", "", "", "", "", "", 
  "", "", "", "", "", "", "", "", "", "", "", 1.340598113*^9, "", "", "", "", 
  "", "", "", "", "", "", "", "", "", ""}, {"OWID_AFR", "", "Africa", 
  "2020-03-24", 2250., 432., 252.286, 64., 7., 7.571, 1.678, 0.322, 0.188, 
  0.048, 0.005, 0.006, "", "", "", "", "", "", "", "", "", "", "", "", "", 
  "", "", "", "", "", "", "", "", "", "", "", "", "", "", "", 1.340598113*^9, 
  "", "", "", "", "", "", "", "", "", "", "", "", "", ""}, 
 {"OWID_AFR", "", "Africa", "2020-03-25", 2773., 523., 310.429, 73., 9., 8., 
  2.068, 0.39, 0.232, 0.054, 0.007, 0.006, "", "", "", "", "", "", "", "", 
  "", "", "", "", "", "", "", "", "", "", "", "", "", "", "", "", "", "", "", 
  "", 1.340598113*^9, "", "", "", "", "", "", "", "", "", "", "", "", "", 
  ""}, {"OWID_AFR", "", "Africa", "2020-03-26", 3326., 553., 363.714, 91., 
  18., 10.143, 2.481, 0.413, 0.271, 0.068, 0.013, 0.008, "", "", "", "", "", 
  "", "", "", "", "", "", "", "", "", "", "", "", "", "", "", "", "", "", "", 
  "", "", "", "", 1.340598113*^9, "", "", "", "", "", "", "", "", "", "", "", 
  "", "", ""}, {"OWID_AFR", "", "Africa", "2020-03-27", 3885., 559., 416.714, 
  115., 24., 12.714, 2.898, 0.417, 0.311, 0.086, 0.018, 0.009, "", "", "", 
  "", "", "", "", "", "", "", "", "", "", "", "", "", "", "", "", "", "", "", 
  "", "", "", "", "", "", 1.340598113*^9, "", "", "", "", "", "", "", "", "", 
  "", "", "", "", ""}, {"OWID_AFR", "", "Africa", "2020-03-28", 4225., 340., 
  436.143, 134., 19., 14., 3.152, 0.254, 0.325, 0.1, 0.014, 0.01, "", "", "", 
  "", "", "", "", "", "", "", "", "", "", "", "", "", "", "", "", "", "", "", 
  "", "", "", "", "", "", 1.340598113*^9, "", "", "", "", "", "", "", "", "", 
  "", "", "", "", ""}, {"OWID_AFR", "", "Africa", "2020-03-29", 4785., 560., 
  478.286, 152., 18., 14.857, 3.569, 0.418, 0.357, 0.113, 0.013, 0.011, "", 
  "", "", "", "", "", "", "", "", "", "", "", "", "", "", "", "", "", "", "", 
  "", "", "", "", "", "", "", "", 1.340598113*^9, "", "", "", "", "", "", "", 
  "", "", "", "", "", "", ""}, {"OWID_AFR", "", "Africa", "2020-03-30", 
  5196., 411., 482.571, 173., 21., 16.571, 3.876, 0.307, 0.36, 0.129, 0.016, 
  0.012, "", "", "", "", "", "", "", "", "", "", "", "", "", "", "", "", "", 
  "", "", "", "", "", "", "", "", "", "", "", 1.340598113*^9, "", "", "", "", 
  "", "", "", "", "", "", "", "", "", ""}, {"OWID_AFR", "", "Africa", 
  "2020-03-31", 5781., 585., 504.429, 200., 27., 19.429, 4.312, 0.436, 0.376, 
  0.149, 0.02, 0.014, "", "", "", "", "", "", "", "", "", "", "", "", "", "", 
  "", "", "", "", "", "", "", "", "", "", "", "", "", "", 1.340598113*^9, "", 
  "", "", "", "", "", "", "", "", "", "", "", "", ""}, 
 {"OWID_AFR", "", "Africa", "2020-04-01", 6380., 599., 515.286, 234., 34., 
  23., 4.759, 0.447, 0.384, 0.175, 0.025, 0.017, "", "", "", "", "", "", "", 
  "", "", "", "", "", "", "", "", "", "", "", "", "", "", "", "", "", "", "", 
  "", "", 1.340598113*^9, "", "", "", "", "", "", "", "", "", "", "", "", "", 
  ""}, {"OWID_AFR", "", "Africa", "2020-04-02", 7031., 651., 529.286, 287., 
  53., 28., 5.245, 0.486, 0.395, 0.214, 0.04, 0.021, "", "", "", "", "", "", 
  "", "", "", "", "", "", "", "", "", "", "", "", "", "", "", "", "", "", "", 
  "", "", "", 1.340598113*^9, "", "", "", "", "", "", "", "", "", "", "", "", 
  "", ""}, {"OWID_AFR", "", "Africa", "2020-04-03", 7913., 882., 575.429, 
  331., 44., 30.857, 5.903, 0.658, 0.429, 0.247, 0.033, 0.023, "", "", "", 
  "", "", "", "", "", "", "", "", "", "", "", "", "", "", "", "", "", "", "", 
  "", "", "", "", "", "", 1.340598113*^9, "", "", "", "", "", "", "", "", "", 
  "", "", "", "", ""}, {"OWID_AFR", "", "Africa", "2020-04-04", 8592., 679., 
  623.857, 383., 52., 35.571, 6.409, 0.506, 0.465, 0.286, 0.039, 0.027, "", 
  "", "", "", "", "", "", "", "", "", "", "", "", "", "", "", "", "", "", "", 
  "", "", "", "", "", "", "", "", 1.340598113*^9, "", "", "", "", "", "", "", 
  "", "", "", "", "", "", ""}, {"OWID_AFR", "", "Africa", "2020-04-05", 
  9298., 706., 644.714, 444., 61., 41.714, 6.936, 0.527, 0.481, 0.331, 0.046, 
  0.031, "", "", "", "", "", "", "", "", "", "", "", "", "", "", "", "", "", 
  "", "", "", "", "", "", "", "", "", "", "", 1.340598113*^9, "", "", "", "", 
  "", "", "", "", "", "", "", "", "", ""}, {"OWID_AFR", "", "Africa", 
  "2020-04-06", 9999., 701., 686.143, 487., 43., 44.857, 7.459, 0.523, 0.512, 
  0.363, 0.032, 0.033, "", "", "", "", "", "", "", "", "", "", "", "", "", 
  "", "", "", "", "", "", "", "", "", "", "", "", "", "", "", 1.340598113*^9, 
  "", "", "", "", "", "", "", "", "", "", "", "", "", ""}, 
 {"OWID_AFR", "", "Africa", "2020-04-07", 10632., 633., 693., 533., 46., 
  47.571, 7.931, 0.472, 0.517, 0.398, 0.034, 0.035, "", "", "", "", "", "", 
  "", "", "", "", "", "", "", "", "", "", "", "", "", "", "", "", "", "", "", 
  "", "", "", 1.340598113*^9, "", "", "", "", "", "", "", "", "", "", "", "", 
  "", ""}, {"OWID_AFR", "", "Africa", "2020-04-08", 11436., 804., 722.286, 
  574., 41., 48.571, 8.531, 0.6, 0.539, 0.428, 0.031, 0.036, "", "", "", "", 
  "", "", "", "", "", "", "", "", "", "", "", "", "", "", "", "", "", "", "", 
  "", "", "", "", "", 1.340598113*^9, "", "", "", "", "", "", "", "", "", "", 
  "", "", "", ""}, {"OWID_AFR", "", "Africa", "2020-04-09", 12248., 812., 
  745.286, 627., 53., 48.571, 9.136, 0.606, 0.556, 0.468, 0.04, 0.036, "", 
  "", "", "", "", "", "", "", "", "", "", "", "", "", "", "", "", "", "", "", 
  "", "", "", "", "", "", "", "", 1.340598113*^9, "", "", "", "", "", "", "", 
  "", "", "", "", "", "", ""}, {"OWID_AFR", "", "Africa", "2020-04-10", 
  12911., 663., 714., 693., 66., 51.714, 9.631, 0.495, 0.533, 0.517, 0.049, 
  0.039, "", "", "", "", "", "", "", "", "", "", "", "", "", "", "", "", "", 
  "", "", "", "", "", "", "", "", "", "", "", 1.340598113*^9, "", "", "", "", 
  "", "", "", "", "", "", "", "", "", ""}, {"OWID_AFR", "", "Africa", 
  "2020-04-11", 13627., 716., 719.286, 742., 49., 51.286, 10.165, 0.534, 
  0.537, 0.553, 0.037, 0.038, "", "", "", "", "", "", "", "", "", "", "", "", 
  "", "", "", "", "", "", "", "", "", "", "", "", "", "", "", "", 
  1.340598113*^9, "", "", "", "", "", "", "", "", "", "", "", "", "", ""}, 
 {"OWID_AFR", "", "Africa", "2020-04-12", 14491., 864., 741.857, 788., 46., 
  49.143, 10.809, 0.644, 0.553, 0.588, 0.034, 0.037, "", "", "", "", "", "", 
  "", "", "", "", "", "", "", "", "", "", "", "", "", "", "", "", "", "", "", 
  "", "", "", 1.340598113*^9, "", "", "", "", "", "", "", "", "", "", "", "", 
  "", ""}, {"OWID_AFR", "", "Africa", "2020-04-13", 15265., 774., 752.286, 
  834., 46., 49.571, 11.387, 0.577, 0.561, 0.622, 0.034, 0.037, "", "", "", 
  "", "", "", "", "", "", "", "", "", "", "", "", "", "", "", "", "", "", "", 
  "", "", "", "", "", "", 1.340598113*^9, "", "", "", "", "", "", "", "", "", 
  "", "", "", "", ""}, {"OWID_AFR", "", "Africa", "2020-04-14", 16235., 970., 
  800.429, 873., 39., 48.571, 12.11, 0.724, 0.597, 0.651, 0.029, 0.036, "", 
  "", "", "", "", "", "", "", "", "", "", "", "", "", "", "", "", "", "", "", 
  "", "", "", "", "", "", "", "", 1.340598113*^9, "", "", "", "", "", "", "", 
  "", "", "", "", "", "", ""}, {"OWID_AFR", "", "Africa", "2020-04-15", 
  17192., 957., 822.286, 910., 37., 48., 12.824, 0.714, 0.613, 0.679, 0.028, 
  0.036, "", "", "", "", "", "", "", "", "", "", "", "", "", "", "", "", "", 
  "", "", "", "", "", "", "", "", "", "", "", 1.340598113*^9, "", "", "", "", 
  "", "", "", "", "", "", "", "", "", ""}, {"OWID_AFR", "", "Africa", 
  "2020-04-16", 18360., 1168., 873.143, 965., 55., 48.286, 13.695, 0.871, 
  0.651, 0.72, 0.041, 0.036, "", "", "", "", "", "", "", "", "", "", "", "", 
  "", "", "", "", "", "", "", "", "", "", "", "", "", "", "", "", 
  1.340598113*^9, "", "", "", "", "", "", "", "", "", "", "", "", "", ""}, 
 {"OWID_AFR", "", "Africa", "2020-04-17", 19766., 1406., 979.286, 1016., 51., 
  46.143, 14.744, 1.049, 0.73, 0.758, 0.038, 0.034, "", "", "", "", "", "", 
  "", "", "", "", "", "", "", "", "", "", "", "", "", "", "", "", "", "", "", 
  "", "", "", 1.340598113*^9, "", "", "", "", "", "", "", "", "", "", "", "", 
  "", ""}, {"OWID_AFR", "", "Africa", "2020-04-18", 21072., 1306., 1063.571, 
  1058., 42., 45.143, 15.718, 0.974, 0.793, 0.789, 0.031, 0.034, "", "", "", 
  "", "", "", "", "", "", "", "", "", "", "", "", "", "", "", "", "", "", "", 
  "", "", "", "", "", "", 1.340598113*^9, "", "", "", "", "", "", "", "", "", 
  "", "", "", "", ""}, {"OWID_AFR", "", "Africa", "2020-04-19", 22281., 
  1209., 1112.857, 1121., 63., 47.571, 16.62, 0.902, 0.83, 0.836, 0.047, 
  0.035, "", "", "", "", "", "", "", "", "", "", "", "", "", "", "", "", "", 
  "", "", "", "", "", "", "", "", "", "", "", 1.340598113*^9, "", "", "", "", 
  "", "", "", "", "", "", "", "", "", ""}, {"OWID_AFR", "", "Africa", 
  "2020-04-20", 23439., 1158., 1167.714, 1159., 38., 46.429, 17.484, 0.864, 
  0.871, 0.865, 0.028, 0.035, "", "", "", "", "", "", "", "", "", "", "", "", 
  "", "", "", "", "", "", "", "", "", "", "", "", "", "", "", "", 
  1.340598113*^9, "", "", "", "", "", "", "", "", "", "", "", "", "", ""}, 
 {"OWID_AFR", "", "Africa", "2020-04-21", 24509., 1070., 1182., 1189., 30., 
  45.143, 18.282, 0.798, 0.882, 0.887, 0.022, 0.034, "", "", "", "", "", "", 
  "", "", "", "", "", "", "", "", "", "", "", "", "", "", "", "", "", "", "", 
  "", "", "", 1.340598113*^9, "", "", "", "", "", "", "", "", "", "", "", "", 
  "", ""}, {"OWID_AFR", "", "Africa", "2020-04-22", 25911., 1402., 1245.571, 
  1240., 51., 47.143, 19.328, 1.046, 0.929, 0.925, 0.038, 0.035, "", "", "", 
  "", "", "", "", "", "", "", "", "", "", "", "", "", "", "", "", "", "", "", 
  "", "", "", "", "", "", 1.340598113*^9, "", "", "", "", "", "", "", "", "", 
  "", "", "", "", ""}, {"OWID_AFR", "", "Africa", "2020-04-23", 27349., 
  1438., 1284.143, 1297., 57., 47.429, 20.401, 1.073, 0.958, 0.967, 0.043, 
  0.035, "", "", "", "", "", "", "", "", "", "", "", "", "", "", "", "", "", 
  "", "", "", "", "", "", "", "", "", "", "", 1.340598113*^9, "", "", "", "", 
  "", "", "", "", "", "", "", "", "", ""}, {"OWID_AFR", "", "Africa", 
  "2020-04-24", 29068., 1719., 1328.857, 1324., 27., 44., 21.683, 1.282, 
  0.991, 0.988, 0.02, 0.033, "", "", "", "", "", "", "", "", "", "", "", "", 
  "", "", "", "", "", "", "", "", "", "", "", "", "", "", "", "", 
  1.340598113*^9, "", "", "", "", "", "", "", "", "", "", "", "", "", ""}, 
 {"OWID_AFR", "", "Africa", "2020-04-25", 30299., 1231., 1318.143, 1375., 
  51., 45.286, 22.601, 0.918, 0.983, 1.026, 0.038, 0.034, "", "", "", "", "", 
  "", "", "", "", "", "", "", "", "", "", "", "", "", "", "", "", "", "", "", 
  "", "", "", "", 1.340598113*^9, "", "", "", "", "", "", "", "", "", "", "", 
  "", "", ""}, {"OWID_AFR", "", "Africa", "2020-04-26", 31833., 1534., 
  1364.571, 1423., 48., 43.143, 23.745, 1.144, 1.018, 1.061, 0.036, 0.032, 
  "", "", "", "", "", "", "", "", "", "", "", "", "", "", "", "", "", "", "", 
  "", "", "", "", "", "", "", "", "", 1.340598113*^9, "", "", "", "", "", "", 
  "", "", "", "", "", "", "", ""}, {"OWID_AFR", "", "Africa", "2020-04-27", 
  33167., 1334., 1389.714, 1462., 39., 43.286, 24.74, 0.995, 1.037, 1.091, 
  0.029, 0.032, "", "", "", "", "", "", "", "", "", "", "", "", "", "", "", 
  "", "", "", "", "", "", "", "", "", "", "", "", "", 1.340598113*^9, "", "", 
  "", "", "", "", "", "", "", "", "", "", "", ""}, 
 {"OWID_AFR", "", "Africa", "2020-04-28", 34794., 1627., 1469.286, 1523., 
  61., 47.714, 25.954, 1.214, 1.096, 1.136, 0.046, 0.036, "", "", "", "", "", 
  "", "", "", "", "", "", "", "", "", "", "", "", "", "", "", "", "", "", "", 
  "", "", "", "", 1.340598113*^9, "", "", "", "", "", "", "", "", "", "", "", 
  "", "", ""}, {"OWID_AFR", "", "Africa", "2020-04-29", 36807., 2013., 
  1556.571, 1588., 65., 49.714, 27.456, 1.502, 1.161, 1.185, 0.048, 0.037, 
  "", "", "", "", "", "", "", "", "", "", "", "", "", "", "", "", "", "", "", 
  "", "", "", "", "", "", "", "", "", 1.340598113*^9, "", "", "", "", "", "", 
  "", "", "", "", "", "", "", ""}, {"OWID_AFR", "", "Africa", "2020-04-30", 
  38753., 1946., 1629.143, 1634., 46., 48.143, 28.907, 1.452, 1.215, 1.219, 
  0.034, 0.036, "", "", "", "", "", "", "", "", "", "", "", "", "", "", "", 
  "", "", "", "", "", "", "", "", "", "", "", "", "", 1.340598113*^9, "", "", 
  "", "", "", "", "", "", "", "", "", "", "", ""}, 
 {"OWID_AFR", "", "Africa", "2020-05-01", 40479., 1726., 1630.143, 1692., 
  58., 52.571, 30.195, 1.287, 1.216, 1.262, 0.043, 0.039, "", "", "", "", "", 
  "", "", "", "", "", "", "", "", "", "", "", "", "", "", "", "", "", "", "", 
  "", "", "", "", 1.340598113*^9, "", "", "", "", "", "", "", "", "", "", "", 
  "", "", ""}, {"OWID_AFR", "", "Africa", "2020-05-02", 42707., 2228., 
  1772.571, 1759., 67., 54.857, 31.857, 1.662, 1.322, 1.312, 0.05, 0.041, "", 
  "", "", "", "", "", "", "", "", "", "", "", "", "", "", "", "", "", "", "", 
  "", "", "", "", "", "", "", "", 1.340598113*^9, "", "", "", "", "", "", "", 
  "", "", "", "", "", "", ""}, {"OWID_AFR", "", "Africa", "2020-05-03", 
  44301., 1594., 1781.143, 1796., 37., 53.286, 33.046, 1.189, 1.329, 1.34, 
  0.028, 0.04, "", "", "", "", "", "", "", "", "", "", "", "", "", "", "", 
  "", "", "", "", "", "", "", "", "", "", "", "", "", 1.340598113*^9, "", "", 
  "", "", "", "", "", "", "", "", "", "", "", ""}, 
 {"OWID_AFR", "", "Africa", "2020-05-04", 46959., 2658., 1970.286, 1842., 
  46., 54.286, 35.028, 1.983, 1.47, 1.374, 0.034, 0.04, "", "", "", "", "", 
  "", "", "", "", "", "", "", "", "", "", "", "", "", "", "", "", "", "", "", 
  "", "", "", "", 1.340598113*^9, "", "", "", "", "", "", "", "", "", "", "", 
  "", "", ""}, {"OWID_AFR", "", "Africa", "2020-05-05", 48997., 2038., 2029., 
  1908., 66., 55., 36.549, 1.52, 1.514, 1.423, 0.049, 0.041, "", "", "", "", 
  "", "", "", "", "", "", "", "", "", "", "", "", "", "", "", "", "", "", "", 
  "", "", "", "", "", 1.340598113*^9, "", "", "", "", "", "", "", "", "", "", 
  "", "", "", ""}, {"OWID_AFR", "", "Africa", "2020-05-06", 51543., 2546., 
  2105.143, 2006., 98., 59.714, 38.448, 1.899, 1.57, 1.496, 0.073, 0.045, "", 
  "", "", "", "", "", "", "", "", "", "", "", "", "", "", "", "", "", "", "", 
  "", "", "", "", "", "", "", "", 1.340598113*^9, "", "", "", "", "", "", "", 
  "", "", "", "", "", "", ""}, {"OWID_AFR", "", "Africa", "2020-05-07", 
  54033., 2490., 2182.857, 2073., 67., 62.714, 40.305, 1.857, 1.628, 1.546, 
  0.05, 0.047, "", "", "", "", "", "", "", "", "", "", "", "", "", "", "", 
  "", "", "", "", "", "", "", "", "", "", "", "", "", 1.340598113*^9, "", "", 
  "", "", "", "", "", "", "", "", "", "", "", ""}, 
 {"OWID_AFR", "", "Africa", "2020-05-08", 57657., 3624., 2454., 2154., 81., 
  66., 43.008, 2.703, 1.831, 1.607, 0.06, 0.049, "", "", "", "", "", "", "", 
  "", "", "", "", "", "", "", "", "", "", "", "", "", "", "", "", "", "", "", 
  "", "", 1.340598113*^9, "", "", "", "", "", "", "", "", "", "", "", "", "", 
  ""}, {"OWID_AFR", "", "Africa", "2020-05-09", 60507., 2850., 2542.857, 
  2221., 67., 66., 45.134, 2.126, 1.897, 1.657, 0.05, 0.049, "", "", "", "", 
  "", "", "", "", "", "", "", "", "", "", "", "", "", "", "", "", "", "", "", 
  "", "", "", "", "", 1.340598113*^9, "", "", "", "", "", "", "", "", "", "", 
  "", "", "", ""}, {"OWID_AFR", "", "Africa", "2020-05-10", 63086., 2579., 
  2683.571, 2290., 69., 70.571, 47.058, 1.924, 2.002, 1.708, 0.051, 0.053, 
  "", "", "", "", "", "", "", "", "", "", "", "", "", "", "", "", "", "", "", 
  "", "", "", "", "", "", "", "", "", 1.340598113*^9, "", "", "", "", "", "", 
  "", "", "", "", "", "", "", ""}, {"OWID_AFR", "", "Africa", "2020-05-11", 
  66152., 3066., 2741.857, 2344., 54., 71.714, 49.345, 2.287, 2.045, 1.748, 
  0.04, 0.053, "", "", "", "", "", "", "", "", "", "", "", "", "", "", "", 
  "", "", "", "", "", "", "", "", "", "", "", "", "", 1.340598113*^9, "", "", 
  "", "", "", "", "", "", "", "", "", "", "", ""}, 
 {"OWID_AFR", "", "Africa", "2020-05-12", 69312., 3160., 2902.143, 2395., 
  51., 69.571, 51.702, 2.357, 2.165, 1.787, 0.038, 0.052, "", "", "", "", "", 
  "", "", "", "", "", "", "", "", "", "", "", "", "", "", "", "", "", "", "", 
  "", "", "", "", 1.340598113*^9, "", "", "", "", "", "", "", "", "", "", "", 
  "", "", ""}, {"OWID_AFR", "", "Africa", "2020-05-13", 72227., 2915., 
  2954.857, 2493., 98., 69.571, 53.877, 2.174, 2.204, 1.86, 0.073, 0.052, "", 
  "", "", "", "", "", "", "", "", "", "", "", "", "", "", "", "", "", "", "", 
  "", "", "", "", "", "", "", "", 1.340598113*^9, "", "", "", "", "", "", "", 
  "", "", "", "", "", "", ""}, {"OWID_AFR", "", "Africa", "2020-05-14", 
  75346., 3119., 3044.714, 2562., 69., 69.857, 56.203, 2.327, 2.271, 1.911, 
  0.051, 0.052, "", "", "", "", "", "", "", "", "", "", "", "", "", "", "", 
  "", "", "", "", "", "", "", "", "", "", "", "", "", 1.340598113*^9, "", "", 
  "", "", "", "", "", "", "", "", "", "", "", ""}, 
 {"OWID_AFR", "", "Africa", "2020-05-15", 78274., 2928., 2945.286, 2624., 
  62., 67.143, 58.387, 2.184, 2.197, 1.957, 0.046, 0.05, "", "", "", "", "", 
  "", "", "", "", "", "", "", "", "", "", "", "", "", "", "", "", "", "", "", 
  "", "", "", "", 1.340598113*^9, "", "", "", "", "", "", "", "", "", "", "", 
  "", "", ""}, {"OWID_AFR", "", "Africa", "2020-05-16", 81277., 3003., 
  2967.143, 2708., 84., 69.571, 60.627, 2.24, 2.213, 2.02, 0.063, 0.052, "", 
  "", "", "", "", "", "", "", "", "", "", "", "", "", "", "", "", "", "", "", 
  "", "", "", "", "", "", "", "", 1.340598113*^9, "", "", "", "", "", "", "", 
  "", "", "", "", "", "", ""}, {"OWID_AFR", "", "Africa", "2020-05-17", 
  84590., 3313., 3072., 2759., 51., 67., 63.099, 2.471, 2.292, 2.058, 0.038, 
  0.05, "", "", "", "", "", "", "", "", "", "", "", "", "", "", "", "", "", 
  "", "", "", "", "", "", "", "", "", "", "", 1.340598113*^9, "", "", "", "", 
  "", "", "", "", "", "", "", "", "", ""}, {"OWID_AFR", "", "Africa", 
  "2020-05-18", 88258., 3668., 3158., 2832., 73., 69.714, 65.835, 2.736, 
  2.356, 2.112, 0.054, 0.052, "", "", "", "", "", "", "", "", "", "", "", "", 
  "", "", "", "", "", "", "", "", "", "", "", "", "", "", "", "", 
  1.340598113*^9, "", "", "", "", "", "", "", "", "", "", "", "", "", ""}, 
 {"OWID_AFR", "", "Africa", "2020-05-19", 91270., 3012., 3136.857, 2907., 
  75., 73.143, 68.082, 2.247, 2.34, 2.168, 0.056, 0.055, "", "", "", "", "", 
  "", "", "", "", "", "", "", "", "", "", "", "", "", "", "", "", "", "", "", 
  "", "", "", "", 1.340598113*^9, "", "", "", "", "", "", "", "", "", "", "", 
  "", "", ""}, {"OWID_AFR", "", "Africa", "2020-05-20", 95062., 3792., 
  3262.143, 2990., 83., 71., 70.91, 2.829, 2.433, 2.23, 0.062, 0.053, "", "", 
  "", "", "", "", "", "", "", "", "", "", "", "", "", "", "", "", "", "", "", 
  "", "", "", "", "", "", "", 1.340598113*^9, "", "", "", "", "", "", "", "", 
  "", "", "", "", "", ""}, {"OWID_AFR", "", "Africa", "2020-05-21", 99754., 
  4692., 3486.857, 3095., 105., 76.143, 74.41, 3.5, 2.601, 2.309, 0.078, 
  0.057, "", "", "", "", "", "", "", "", "", "", "", "", "", "", "", "", "", 
  "", "", "", "", "", "", "", "", "", "", "", 1.340598113*^9, "", "", "", "", 
  "", "", "", "", "", "", "", "", "", ""}, {"OWID_AFR", "", "Africa", 
  "2020-05-22", 103629., 3875., 3622.143, 3184., 89., 80., 77.301, 2.891, 
  2.702, 2.375, 0.066, 0.06, "", "", "", "", "", "", "", "", "", "", "", "", 
  "", "", "", "", "", "", "", "", "", "", "", "", "", "", "", "", 
  1.340598113*^9, "", "", "", "", "", "", "", "", "", "", "", "", "", ""}, 
 {"OWID_AFR", "", "Africa", "2020-05-23", 107491., 3862., 3744.857, 3257., 
  73., 78.429, 80.181, 2.881, 2.793, 2.43, 0.054, 0.059, "", "", "", "", "", 
  "", "", "", "", "", "", "", "", "", "", "", "", "", "", "", "", "", "", "", 
  "", "", "", "", 1.340598113*^9, "", "", "", "", "", "", "", "", "", "", "", 
  "", "", ""}, {"OWID_AFR", "", "Africa", "2020-05-24", 111617., 4126., 
  3861., 3354., 97., 85., 83.259, 3.078, 2.88, 2.502, 0.072, 0.063, "", "", 
  "", "", "", "", "", "", "", "", "", "", "", "", "", "", "", "", "", "", "", 
  "", "", "", "", "", "", "", 1.340598113*^9, "", "", "", "", "", "", "", "", 
  "", "", "", "", "", ""}, {"OWID_AFR", "", "Africa", "2020-05-25", 115733., 
  4116., 3925., 3479., 125., 92.429, 86.329, 3.07, 2.928, 2.595, 0.093, 
  0.069, "", "", "", "", "", "", "", "", "", "", "", "", "", "", "", "", "", 
  "", "", "", "", "", "", "", "", "", "", "", 1.340598113*^9, "", "", "", "", 
  "", "", "", "", "", "", "", "", "", ""}, {"OWID_AFR", "", "Africa", 
  "2020-05-26", 119445., 3712., 4025., 3591., 112., 97.714, 89.098, 2.769, 
  3.002, 2.679, 0.084, 0.073, "", "", "", "", "", "", "", "", "", "", "", "", 
  "", "", "", "", "", "", "", "", "", "", "", "", "", "", "", "", 
  1.340598113*^9, "", "", "", "", "", "", "", "", "", "", "", "", "", ""}, 
 {"OWID_AFR", "", "Africa", "2020-05-27", 124524., 5079., 4208.857, 3699., 
  108., 101.286, 92.887, 3.789, 3.14, 2.759, 0.081, 0.076, "", "", "", "", 
  "", "", "", "", "", "", "", "", "", "", "", "", "", "", "", "", "", "", "", 
  "", "", "", "", "", 1.340598113*^9, "", "", "", "", "", "", "", "", "", "", 
  "", "", "", ""}, {"OWID_AFR", "", "Africa", "2020-05-28", 129443., 4919., 
  4241.286, 3791., 92., 99.429, 96.556, 3.669, 3.164, 2.828, 0.069, 0.074, 
  "", "", "", "", "", "", "", "", "", "", "", "", "", "", "", "", "", "", "", 
  "", "", "", "", "", "", "", "", "", 1.340598113*^9, "", "", "", "", "", "", 
  "", "", "", "", "", "", "", ""}, {"OWID_AFR", "", "Africa", "2020-05-29", 
  135191., 5748., 4508.857, 3922., 131., 105.429, 100.844, 4.288, 3.363, 
  2.926, 0.098, 0.079, "", "", "", "", "", "", "", "", "", "", "", "", "", 
  "", "", "", "", "", "", "", "", "", "", "", "", "", "", "", 1.340598113*^9, 
  "", "", "", "", "", "", "", "", "", "", "", "", "", ""}, 
 {"OWID_AFR", "", "Africa", "2020-05-30", 141311., 6120., 4831.429, 4069., 
  147., 116., 105.409, 4.565, 3.604, 3.035, 0.11, 0.087, "", "", "", "", "", 
  "", "", "", "", "", "", "", "", "", "", "", "", "", "", "", "", "", "", "", 
  "", "", "", "", 1.340598113*^9, "", "", "", "", "", "", "", "", "", "", "", 
  "", "", ""}, {"OWID_AFR", "", "Africa", "2020-05-31", 146559., 5248., 
  4991.714, 4222., 153., 124., 109.324, 3.915, 3.723, 3.149, 0.114, 0.092, 
  "", "", "", "", "", "", "", "", "", "", "", "", "", "", "", "", "", "", "", 
  "", "", "", "", "", "", "", "", "", 1.340598113*^9, "", "", "", "", "", "", 
  "", "", "", "", "", "", "", ""}, {"OWID_AFR", "", "Africa", "2020-06-01", 
  152344., 5785., 5230.143, 4343., 121., 123.429, 113.639, 4.315, 3.901, 
  3.24, 0.09, 0.092, "", "", "", "", "", "", "", "", "", "", "", "", "", "", 
  "", "", "", "", "", "", "", "", "", "", "", "", "", "", 1.340598113*^9, "", 
  "", "", "", "", "", "", "", "", "", "", "", "", ""}, 
 {"OWID_AFR", "", "Africa", "2020-06-02", 157229., 4885., 5397.714, 4494., 
  151., 129., 117.283, 3.644, 4.026, 3.352, 0.113, 0.096, "", "", "", "", "", 
  "", "", "", "", "", "", "", "", "", "", "", "", "", "", "", "", "", "", "", 
  "", "", "", "", 1.340598113*^9, "", "", "", "", "", "", "", "", "", "", "", 
  "", "", ""}, {"OWID_AFR", "", "Africa", "2020-06-03", 162316., 5087., 
  5398.857, 4601., 107., 128.857, 121.077, 3.795, 4.027, 3.432, 0.08, 0.096, 
  "", "", "", "", "", "", "", "", "", "", "", "", "", "", "", "", "", "", "", 
  "", "", "", "", "", "", "", "", "", 1.340598113*^9, "", "", "", "", "", "", 
  "", "", "", "", "", "", "", ""}, {"OWID_AFR", "", "Africa", "2020-06-04", 
  169422., 7106., 5711.286, 4756., 155., 137.857, 126.378, 5.301, 4.26, 
  3.548, 0.116, 0.103, "", "", "", "", "", "", "", "", "", "", "", "", "", 
  "", "", "", "", "", "", "", "", "", "", "", "", "", "", "", 1.340598113*^9, 
  "", "", "", "", "", "", "", "", "", "", "", "", "", ""}, 
 {"OWID_AFR", "", "Africa", "2020-06-05", 176618., 7196., 5918.143, 4915., 
  159., 141.857, 131.746, 5.368, 4.415, 3.666, 0.119, 0.106, "", "", "", "", 
  "", "", "", "", "", "", "", "", "", "", "", "", "", "", "", "", "", "", "", 
  "", "", "", "", "", 1.340598113*^9, "", "", "", "", "", "", "", "", "", "", 
  "", "", "", ""}, {"OWID_AFR", "", "Africa", "2020-06-06", 183213., 6595., 
  5986., 5055., 140., 140.857, 136.665, 4.919, 4.465, 3.771, 0.104, 0.105, 
  "", "", "", "", "", "", "", "", "", "", "", "", "", "", "", "", "", "", "", 
  "", "", "", "", "", "", "", "", "", 1.340598113*^9, "", "", "", "", "", "", 
  "", "", "", "", "", "", "", ""}, {"OWID_AFR", "", "Africa", "2020-06-07", 
  189550., 6337., 6141.571, 5188., 133., 138., 141.392, 4.727, 4.581, 3.87, 
  0.099, 0.103, "", "", "", "", "", "", "", "", "", "", "", "", "", "", "", 
  "", "", "", "", "", "", "", "", "", "", "", "", "", 1.340598113*^9, "", "", 
  "", "", "", "", "", "", "", "", "", "", "", ""}, 
 {"OWID_AFR", "", "Africa", "2020-06-08", 196198., 6648., 6264.857, 5363., 
  175., 145.714, 146.351, 4.959, 4.673, 4., 0.131, 0.109, "", "", "", "", "", 
  "", "", "", "", "", "", "", "", "", "", "", "", "", "", "", "", "", "", "", 
  "", "", "", "", 1.340598113*^9, "", "", "", "", "", "", "", "", "", "", "", 
  "", "", ""}, {"OWID_AFR", "", "Africa", "2020-06-09", 202670., 6472., 
  6491.571, 5538., 175., 149.143, 151.179, 4.828, 4.842, 4.131, 0.131, 0.111, 
  "", "", "", "", "", "", "", "", "", "", "", "", "", "", "", "", "", "", "", 
  "", "", "", "", "", "", "", "", "", 1.340598113*^9, "", "", "", "", "", "", 
  "", "", "", "", "", "", "", ""}, {"OWID_AFR", "", "Africa", "2020-06-10", 
  209216., 6546., 6700., 5688., 150., 155.286, 156.062, 4.883, 4.998, 4.243, 
  0.112, 0.116, "", "", "", "", "", "", "", "", "", "", "", "", "", "", "", 
  "", "", "", "", "", "", "", "", "", "", "", "", "", 1.340598113*^9, "", "", 
  "", "", "", "", "", "", "", "", "", "", "", ""}, 
 {"OWID_AFR", "", "Africa", "2020-06-11", 216618., 7402., 6742.286, 5851., 
  163., 156.429, 161.583, 5.521, 5.029, 4.364, 0.122, 0.117, "", "", "", "", 
  "", "", "", "", "", "", "", "", "", "", "", "", "", "", "", "", "", "", "", 
  "", "", "", "", "", 1.340598113*^9, "", "", "", "", "", "", "", "", "", "", 
  "", "", "", ""}, {"OWID_AFR", "", "Africa", "2020-06-12", 224695., 8077., 
  6868.143, 6050., 199., 162.143, 167.608, 6.025, 5.123, 4.513, 0.148, 0.121, 
  "", "", "", "", "", "", "", "", "", "", "", "", "", "", "", "", "", "", "", 
  "", "", "", "", "", "", "", "", "", 1.340598113*^9, "", "", "", "", "", "", 
  "", "", "", "", "", "", "", ""}, {"OWID_AFR", "", "Africa", "2020-06-13", 
  232796., 8101., 7083.286, 6253., 203., 171.143, 173.651, 6.043, 5.284, 
  4.664, 0.151, 0.128, "", "", "", "", "", "", "", "", "", "", "", "", "", 
  "", "", "", "", "", "", "", "", "", "", "", "", "", "", "", 1.340598113*^9, 
  "", "", "", "", "", "", "", "", "", "", "", "", "", ""}, 
 {"OWID_AFR", "", "Africa", "2020-06-14", 241563., 8767., 7430.429, 6459., 
  206., 181.571, 180.19, 6.54, 5.543, 4.818, 0.154, 0.135, "", "", "", "", 
  "", "", "", "", "", "", "", "", "", "", "", "", "", "", "", "", "", "", "", 
  "", "", "", "", "", 1.340598113*^9, "", "", "", "", "", "", "", "", "", "", 
  "", "", "", ""}, {"OWID_AFR", "", "Africa", "2020-06-15", 251184., 9621., 
  7855.143, 6762., 303., 199.857, 187.367, 7.177, 5.859, 5.044, 0.226, 0.149, 
  "", "", "", "", "", "", "", "", "", "", "", "", "", "", "", "", "", "", "", 
  "", "", "", "", "", "", "", "", "", 1.340598113*^9, "", "", "", "", "", "", 
  "", "", "", "", "", "", "", ""}, {"OWID_AFR", "", "Africa", "2020-06-16", 
  258797., 7613., 8018.143, 7015., 253., 211., 193.046, 5.679, 5.981, 5.233, 
  0.189, 0.157, "", "", "", "", "", "", "", "", "", "", "", "", "", "", "", 
  "", "", "", "", "", "", "", "", "", "", "", "", "", 1.340598113*^9, "", "", 
  "", "", "", "", "", "", "", "", "", "", "", ""}, 
 {"OWID_AFR", "", "Africa", "2020-06-17", 267529., 8732., 8330.429, 7218., 
  203., 218.571, 199.559, 6.514, 6.214, 5.384, 0.151, 0.163, "", "", "", "", 
  "", "", "", "", "", "", "", "", "", "", "", "", "", "", "", "", "", "", "", 
  "", "", "", "", "", 1.340598113*^9, "", "", "", "", "", "", "", "", "", "", 
  "", "", "", ""}, {"OWID_AFR", "", "Africa", "2020-06-18", 275783., 8254., 
  8452.143, 7419., 201., 224., 205.716, 6.157, 6.305, 5.534, 0.15, 0.167, "", 
  "", "", "", "", "", "", "", "", "", "", "", "", "", "", "", "", "", "", "", 
  "", "", "", "", "", "", "", "", 1.340598113*^9, "", "", "", "", "", "", "", 
  "", "", "", "", "", "", ""}, {"OWID_AFR", "", "Africa", "2020-06-19", 
  285609., 9826., 8702., 7682., 263., 233.143, 213.046, 7.33, 6.491, 5.73, 
  0.196, 0.174, "", "", "", "", "", "", "", "", "", "", "", "", "", "", "", 
  "", "", "", "", "", "", "", "", "", "", "", "", "", 1.340598113*^9, "", "", 
  "", "", "", "", "", "", "", "", "", "", "", ""}, 
 {"OWID_AFR", "", "Africa", "2020-06-20", 296939., 11330., 9163.286, 7918., 
  236., 237.857, 221.497, 8.451, 6.835, 5.906, 0.176, 0.177, "", "", "", "", 
  "", "", "", "", "", "", "", "", "", "", "", "", "", "", "", "", "", "", "", 
  "", "", "", "", "", 1.340598113*^9, "", "", "", "", "", "", "", "", "", "", 
  "", "", "", ""}, {"OWID_AFR", "", "Africa", "2020-06-21", 306381., 9442., 
  9259.714, 8115., 197., 236.571, 228.541, 7.043, 6.907, 6.053, 0.147, 0.176, 
  "", "", "", "", "", "", "", "", "", "", "", "", "", "", "", "", "", "", "", 
  "", "", "", "", "", "", "", "", "", 1.340598113*^9, "", "", "", "", "", "", 
  "", "", "", "", "", "", "", ""}, {"OWID_AFR", "", "Africa", "2020-06-22", 
  315370., 8989., 9169.429, 8338., 223., 225.143, 235.246, 6.705, 6.84, 6.22, 
  0.166, 0.168, "", "", "", "", "", "", "", "", "", "", "", "", "", "", "", 
  "", "", "", "", "", "", "", "", "", "", "", "", "", 1.340598113*^9, "", "", 
  "", "", "", "", "", "", "", "", "", "", "", ""}, 
 {"OWID_AFR", "", "Africa", "2020-06-23", 324421., 9051., 9374.857, 8620., 
  282., 229.286, 241.997, 6.751, 6.993, 6.43, 0.21, 0.171, "", "", "", "", 
  "", "", "", "", "", "", "", "", "", "", "", "", "", "", "", "", "", "", "", 
  "", "", "", "", "", 1.340598113*^9, "", "", "", "", "", "", "", "", "", "", 
  "", "", "", ""}, {"OWID_AFR", "", "Africa", "2020-06-24", 335779., 11358., 
  9750., 8855., 235., 233.857, 250.47, 8.472, 7.273, 6.605, 0.175, 0.174, "", 
  "", "", "", "", "", "", "", "", "", "", "", "", "", "", "", "", "", "", "", 
  "", "", "", "", "", "", "", "", 1.340598113*^9, "", "", "", "", "", "", "", 
  "", "", "", "", "", "", ""}, {"OWID_AFR", "", "Africa", "2020-06-25", 
  347729., 11950., 10278., 9069., 214., 235.714, 259.383, 8.914, 7.667, 
  6.765, 0.16, 0.176, "", "", "", "", "", "", "", "", "", "", "", "", "", "", 
  "", "", "", "", "", "", "", "", "", "", "", "", "", "", 1.340598113*^9, "", 
  "", "", "", "", "", "", "", "", "", "", "", "", ""}, 
 {"OWID_AFR", "", "Africa", "2020-06-26", 359306., 11577., 10528.143, 9282., 
  213., 228.571, 268.019, 8.636, 7.853, 6.924, 0.159, 0.17, "", "", "", "", 
  "", "", "", "", "", "", "", "", "", "", "", "", "", "", "", "", "", "", "", 
  "", "", "", "", "", 1.340598113*^9, "", "", "", "", "", "", "", "", "", "", 
  "", "", "", ""}, {"OWID_AFR", "", "Africa", "2020-06-27", 371590., 12284., 
  10664.429, 9484., 202., 223.714, 277.182, 9.163, 7.955, 7.074, 0.151, 
  0.167, "", "", "", "", "", "", "", "", "", "", "", "", "", "", "", "", "", 
  "", "", "", "", "", "", "", "", "", "", "", 1.340598113*^9, "", "", "", "", 
  "", "", "", "", "", "", "", "", "", ""}, {"OWID_AFR", "", "Africa", 
  "2020-06-28", 382237., 10647., 10836.571, 9663., 179., 221.143, 285.124, 
  7.942, 8.083, 7.208, 0.134, 0.165, "", "", "", "", "", "", "", "", "", "", 
  "", "", "", "", "", "", "", "", "", "", "", "", "", "", "", "", "", "", 
  1.340598113*^9, "", "", "", "", "", "", "", "", "", "", "", "", "", ""}, 
 {"OWID_AFR", "", "Africa", "2020-06-29", 393285., 11048., 11130.714, 9879., 
  216., 220.143, 293.365, 8.241, 8.303, 7.369, 0.161, 0.164, "", "", "", "", 
  "", "", "", "", "", "", "", "", "", "", "", "", "", "", "", "", "", "", "", 
  "", "", "", "", "", 1.340598113*^9, "", "", "", "", "", "", "", "", "", "", 
  "", "", "", ""}, {"OWID_AFR", "", "Africa", "2020-06-30", 404901., 11616., 
  11497.143, 10146., 267., 218., 302.03, 8.665, 8.576, 7.568, 0.199, 0.163, 
  "", "", "", "", "", "", "", "", "", "", "", "", "", "", "", "", "", "", "", 
  "", "", "", "", "", "", "", "", "", 1.340598113*^9, "", "", "", "", "", "", 
  "", "", "", "", "", "", "", ""}, {"OWID_AFR", "", "Africa", "2020-07-01", 
  418128., 13227., 11764.143, 10405., 259., 221.429, 311.897, 9.866, 8.775, 
  7.761, 0.193, 0.165, "", "", "", "", "", "", "", "", "", "", "", "", "", 
  "", "", "", "", "", "", "", "", "", "", "", "", "", "", "", 1.340598113*^9, 
  "", "", "", "", "", "", "", "", "", "", "", "", "", ""}, 
 {"OWID_AFR", "", "Africa", "2020-07-02", 432321., 14193., 12084.571, 10643., 
  238., 224.857, 322.484, 10.587, 9.014, 7.939, 0.178, 0.168, "", "", "", "", 
  "", "", "", "", "", "", "", "", "", "", "", "", "", "", "", "", "", "", "", 
  "", "", "", "", "", 1.340598113*^9, "", "", "", "", "", "", "", "", "", "", 
  "", "", "", ""}, {"OWID_AFR", "", "Africa", "2020-07-03", 447480., 15159., 
  12596.286, 10882., 239., 228.571, 333.791, 11.308, 9.396, 8.117, 0.178, 
  0.17, "", "", "", "", "", "", "", "", "", "", "", "", "", "", "", "", "", 
  "", "", "", "", "", "", "", "", "", "", "", 1.340598113*^9, "", "", "", "", 
  "", "", "", "", "", "", "", "", "", ""}, {"OWID_AFR", "", "Africa", 
  "2020-07-04", 462987., 15507., 13056.714, 11083., 201., 228.429, 345.359, 
  11.567, 9.739, 8.267, 0.15, 0.17, "", "", "", "", "", "", "", "", "", "", 
  "", "", "", "", "", "", "", "", "", "", "", "", "", "", "", "", "", "", 
  1.340598113*^9, "", "", "", "", "", "", "", "", "", "", "", "", "", ""}, 
 {"OWID_AFR", "", "Africa", "2020-07-05", 476627., 13640., 13484.286, 11363., 
  280., 242.857, 355.533, 10.175, 10.058, 8.476, 0.209, 0.181, "", "", "", 
  "", "", "", "", "", "", "", "", "", "", "", "", "", "", "", "", "", "", "", 
  "", "", "", "", "", "", 1.340598113*^9, "", "", "", "", "", "", "", "", "", 
  "", "", "", "", ""}, {"OWID_AFR", "", "Africa", "2020-07-06", 490344., 
  13717., 13865.571, 11612., 249., 247.571, 365.765, 10.232, 10.343, 8.662, 
  0.186, 0.185, "", "", "", "", "", "", "", "", "", "", "", "", "", "", "", 
  "", "", "", "", "", "", "", "", "", "", "", "", "", 1.340598113*^9, "", "", 
  "", "", "", "", "", "", "", "", "", "", "", ""}, 
 {"OWID_AFR", "", "Africa", "2020-07-07", 507818., 17474., 14702.429, 11977., 
  365., 261.571, 378.8, 13.034, 10.967, 8.934, 0.272, 0.195, "", "", "", "", 
  "", "", "", "", "", "", "", "", "", "", "", "", "", "", "", "", "", "", "", 
  "", "", "", "", "", 1.340598113*^9, "", "", "", "", "", "", "", "", "", "", 
  "", "", "", ""}, {"OWID_AFR", "", "Africa", "2020-07-08", 522544., 14726., 
  14916.571, 12232., 255., 261., 389.784, 10.985, 11.127, 9.124, 0.19, 0.195, 
  "", "", "", "", "", "", "", "", "", "", "", "", "", "", "", "", "", "", "", 
  "", "", "", "", "", "", "", "", "", 1.340598113*^9, "", "", "", "", "", "", 
  "", "", "", "", "", "", "", ""}, {"OWID_AFR", "", "Africa", "2020-07-09", 
  541756., 19212., 15633.571, 12458., 226., 259.286, 404.115, 14.331, 11.662, 
  9.293, 0.169, 0.193, "", "", "", "", "", "", "", "", "", "", "", "", "", 
  "", "", "", "", "", "", "", "", "", "", "", "", "", "", "", 1.340598113*^9, 
  "", "", "", "", "", "", "", "", "", "", "", "", "", ""}, 
 {"OWID_AFR", "", "Africa", "2020-07-10", 559436., 17680., 15993.714, 12768., 
  310., 269.429, 417.303, 13.188, 11.93, 9.524, 0.231, 0.201, "", "", "", "", 
  "", "", "", "", "", "", "", "", "", "", "", "", "", "", "", "", "", "", "", 
  "", "", "", "", "", 1.340598113*^9, "", "", "", "", "", "", "", "", "", "", 
  "", "", "", ""}, {"OWID_AFR", "", "Africa", "2020-07-11", 578251., 18815., 
  16466.286, 12988., 220., 272.143, 431.338, 14.035, 12.283, 9.688, 0.164, 
  0.203, "", "", "", "", "", "", "", "", "", "", "", "", "", "", "", "", "", 
  "", "", "", "", "", "", "", "", "", "", "", 1.340598113*^9, "", "", "", "", 
  "", "", "", "", "", "", "", "", "", ""}, {"OWID_AFR", "", "Africa", 
  "2020-07-12", 594945., 16694., 16902.571, 13245., 257., 268.857, 443.791, 
  12.453, 12.608, 9.88, 0.192, 0.201, "", "", "", "", "", "", "", "", "", "", 
  "", "", "", "", "", "", "", "", "", "", "", "", "", "", "", "", "", "", 
  1.340598113*^9, "", "", "", "", "", "", "", "", "", "", "", "", "", ""}, 
 {"OWID_AFR", "", "Africa", "2020-07-13", 611016., 16071., 17238.857, 13463., 
  218., 264.429, 455.779, 11.988, 12.859, 10.043, 0.163, 0.197, "", "", "", 
  "", "", "", "", "", "", "", "", "", "", "", "", "", "", "", "", "", "", "", 
  "", "", "", "", "", "", 1.340598113*^9, "", "", "", "", "", "", "", "", "", 
  "", "", "", "", ""}, {"OWID_AFR", "", "Africa", "2020-07-14", 625451., 
  14435., 16804.714, 13762., 299., 255., 466.546, 10.768, 12.535, 10.266, 
  0.223, 0.19, "", "", "", "", "", "", "", "", "", "", "", "", "", "", "", 
  "", "", "", "", "", "", "", "", "", "", "", "", "", 1.340598113*^9, "", "", 
  "", "", "", "", "", "", "", "", "", "", "", ""}, 
 {"OWID_AFR", "", "Africa", "2020-07-15", 643502., 18051., 17279.714, 13988., 
  226., 250.857, 480.011, 13.465, 12.89, 10.434, 0.169, 0.187, "", "", "", 
  "", "", "", "", "", "", "", "", "", "", "", "", "", "", "", "", "", "", "", 
  "", "", "", "", "", "", 1.340598113*^9, "", "", "", "", "", "", "", "", "", 
  "", "", "", "", ""}, {"OWID_AFR", "", "Africa", "2020-07-16", 663943., 
  20441., 17455.286, 14358., 370., 271.429, 495.259, 15.248, 13.021, 10.71, 
  0.276, 0.202, "", "", "", "", "", "", "", "", "", "", "", "", "", "", "", 
  "", "", "", "", "", "", "", "", "", "", "", "", "", 1.340598113*^9, "", "", 
  "", "", "", "", "", "", "", "", "", "", "", ""}, 
 {"OWID_AFR", "", "Africa", "2020-07-17", 683483., 19540., 17721., 14673., 
  315., 272.143, 509.834, 14.576, 13.219, 10.945, 0.235, 0.203, "", "", "", 
  "", "", "", "", "", "", "", "", "", "", "", "", "", "", "", "", "", "", "", 
  "", "", "", "", "", "", 1.340598113*^9, "", "", "", "", "", "", "", "", "", 
  "", "", "", "", ""}, {"OWID_AFR", "", "Africa", "2020-07-18", 702498., 
  19015., 17749.571, 14955., 282., 281., 524.018, 14.184, 13.24, 11.155, 
  0.21, 0.21, "", "", "", "", "", "", "", "", "", "", "", "", "", "", "", "", 
  "", "", "", "", "", "", "", "", "", "", "", "", 1.340598113*^9, "", "", "", 
  "", "", "", "", "", "", "", "", "", "", ""}, 
 {"OWID_AFR", "", "Africa", "2020-07-19", 721052., 18554., 18015.286, 15169., 
  214., 274.857, 537.858, 13.84, 13.438, 11.315, 0.16, 0.205, "", "", "", "", 
  "", "", "", "", "", "", "", "", "", "", "", "", "", "", "", "", "", "", "", 
  "", "", "", "", "", 1.340598113*^9, "", "", "", "", "", "", "", "", "", "", 
  "", "", "", ""}, {"OWID_AFR", "", "Africa", "2020-07-20", 736577., 15525., 
  17937.286, 15423., 254., 280., 549.439, 11.581, 13.38, 11.505, 0.189, 
  0.209, "", "", "", "", "", "", "", "", "", "", "", "", "", "", "", "", "", 
  "", "", "", "", "", "", "", "", "", "", "", 1.340598113*^9, "", "", "", "", 
  "", "", "", "", "", "", "", "", "", ""}, {"OWID_AFR", "", "Africa", 
  "2020-07-21", 750441., 13864., 17855.714, 15737., 314., 282.143, 559.781, 
  10.342, 13.319, 11.739, 0.234, 0.21, "", "", "", "", "", "", "", "", "", 
  "", "", "", "", "", "", "", "", "", "", "", "", "", "", "", "", "", "", "", 
  1.340598113*^9, "", "", "", "", "", "", "", "", "", "", "", "", "", ""}, 
 {"OWID_AFR", "", "Africa", "2020-07-22", 770055., 19614., 18079., 16445., 
  708., 351., 574.412, 14.631, 13.486, 12.267, 0.528, 0.262, "", "", "", "", 
  "", "", "", "", "", "", "", "", "", "", "", "", "", "", "", "", "", "", "", 
  "", "", "", "", "", 1.340598113*^9, "", "", "", "", "", "", "", "", "", "", 
  "", "", "", ""}, {"OWID_AFR", "", "Africa", "2020-07-23", 788522., 18467., 
  17797., 16714., 269., 336.571, 588.187, 13.775, 13.275, 12.468, 0.201, 
  0.251, "", "", "", "", "", "", "", "", "", "", "", "", "", "", "", "", "", 
  "", "", "", "", "", "", "", "", "", "", "", 1.340598113*^9, "", "", "", "", 
  "", "", "", "", "", "", "", "", "", ""}, {"OWID_AFR", "", "Africa", 
  "2020-07-24", 810633., 22111., 18164.286, 17104., 390., 347.286, 604.68, 
  16.493, 13.549, 12.758, 0.291, 0.259, "", "", "", "", "", "", "", "", "", 
  "", "", "", "", "", "", "", "", "", "", "", "", "", "", "", "", "", "", "", 
  1.340598113*^9, "", "", "", "", "", "", "", "", "", "", "", "", "", ""}, 
 {"OWID_AFR", "", "Africa", "2020-07-25", 828784., 18151., 18040.857, 17521., 
  417., 366.571, 618.22, 13.539, 13.457, 13.07, 0.311, 0.273, "", "", "", "", 
  "", "", "", "", "", "", "", "", "", "", "", "", "", "", "", "", "", "", "", 
  "", "", "", "", "", 1.340598113*^9, "", "", "", "", "", "", "", "", "", "", 
  "", "", "", ""}, {"OWID_AFR", "", "Africa", "2020-07-26", 847099., 18315., 
  18006.714, 17766., 245., 371., 631.881, 13.662, 13.432, 13.252, 0.183, 
  0.277, "", "", "", "", "", "", "", "", "", "", "", "", "", "", "", "", "", 
  "", "", "", "", "", "", "", "", "", "", "", 1.340598113*^9, "", "", "", "", 
  "", "", "", "", "", "", "", "", "", ""}, {"OWID_AFR", "", "Africa", 
  "2020-07-27", 860527., 13428., 17707.143, 18175., 409., 393.143, 641.898, 
  10.016, 13.208, 13.557, 0.305, 0.293, "", "", "", "", "", "", "", "", "", 
  "", "", "", "", "", "", "", "", "", "", "", "", "", "", "", "", "", "", "", 
  1.340598113*^9, "", "", "", "", "", "", "", "", "", "", "", "", "", ""}, 
 {"OWID_AFR", "", "Africa", "2020-07-28", 874026., 13499., 17655., 18497., 
  322., 394.286, 651.967, 10.069, 13.169, 13.798, 0.24, 0.294, "", "", "", 
  "", "", "", "", "", "", "", "", "", "", "", "", "", "", "", "", "", "", "", 
  "", "", "", "", "", "", 1.340598113*^9, "", "", "", "", "", "", "", "", "", 
  "", "", "", "", ""}, {"OWID_AFR", "", "Africa", "2020-07-29", 891668., 
  17642., 17373.286, 18864., 367., 345.571, 665.127, 13.16, 12.959, 14.071, 
  0.274, 0.258, "", "", "", "", "", "", "", "", "", "", "", "", "", "", "", 
  "", "", "", "", "", "", "", "", "", "", "", "", "", 1.340598113*^9, "", "", 
  "", "", "", "", "", "", "", "", "", "", "", ""}, 
 {"OWID_AFR", "", "Africa", "2020-07-30", 909075., 17407., 17221.857, 19318., 
  454., 372., 678.112, 12.985, 12.846, 14.41, 0.339, 0.277, "", "", "", "", 
  "", "", "", "", "", "", "", "", "", "", "", "", "", "", "", "", "", "", "", 
  "", "", "", "", "", 1.340598113*^9, "", "", "", "", "", "", "", "", "", "", 
  "", "", "", ""}, {"OWID_AFR", "", "Africa", "2020-07-31", 928080., 19005., 
  16778.143, 19682., 364., 368.286, 692.288, 14.177, 12.515, 14.682, 0.272, 
  0.275, "", "", "", "", "", "", "", "", "", "", "", "", "", "", "", "", "", 
  "", "", "", "", "", "", "", "", "", "", "", 1.340598113*^9, "", "", "", "", 
  "", "", "", "", "", "", "", "", "", ""}, {"OWID_AFR", "", "Africa", 
  "2020-08-01", 945000., 16920., 16602.286, 19974., 292., 350.429, 704.909, 
  12.621, 12.384, 14.899, 0.218, 0.261, "", "", "", "", "", "", "", "", "", 
  "", "", "", "", "", "", "", "", "", "", "", "", "", "", "", "", "", "", "", 
  1.340598113*^9, "", "", "", "", "", "", "", "", "", "", "", "", "", ""}, 
 {"OWID_AFR", "", "Africa", "2020-08-02", 957749., 12749., 15807.143, 20306., 
  332., 362.857, 714.419, 9.51, 11.791, 15.147, 0.248, 0.271, "", "", "", "", 
  "", "", "", "", "", "", "", "", "", "", "", "", "", "", "", "", "", "", "", 
  "", "", "", "", "", 1.340598113*^9, "", "", "", "", "", "", "", "", "", "", 
  "", "", "", ""}, {"OWID_AFR", "", "Africa", "2020-08-03", 968602., 10853., 
  15439.286, 20627., 321., 350.286, 722.515, 8.096, 11.517, 15.386, 0.239, 
  0.261, "", "", "", "", "", "", "", "", "", "", "", "", "", "", "", "", "", 
  "", "", "", "", "", "", "", "", "", "", "", 1.340598113*^9, "", "", "", "", 
  "", "", "", "", "", "", "", "", "", ""}, {"OWID_AFR", "", "Africa", 
  "2020-08-04", 978517., 9915., 14927.286, 21099., 472., 371.714, 729.911, 
  7.396, 11.135, 15.738, 0.352, 0.277, "", "", "", "", "", "", "", "", "", 
  "", "", "", "", "", "", "", "", "", "", "", "", "", "", "", "", "", "", "", 
  1.340598113*^9, "", "", "", "", "", "", "", "", "", "", "", "", "", ""}, 
 {"OWID_AFR", "", "Africa", "2020-08-05", 993891., 15374., 14603.286, 21638., 
  539., 396.286, 741.379, 11.468, 10.893, 16.141, 0.402, 0.296, "", "", "", 
  "", "", "", "", "", "", "", "", "", "", "", "", "", "", "", "", "", "", "", 
  "", "", "", "", "", "", 1.340598113*^9, "", "", "", "", "", "", "", "", "", 
  "", "", "", "", ""}, {"OWID_AFR", "", "Africa", "2020-08-06", 1.008219*^6, 
  14328., 14163.429, 22069., 431., 393., 752.067, 10.688, 10.565, 16.462, 
  0.321, 0.293, "", "", "", "", "", "", "", "", "", "", "", "", "", "", "", 
  "", "", "", "", "", "", "", "", "", "", "", "", "", 1.340598113*^9, "", "", 
  "", "", "", "", "", "", "", "", "", "", "", ""}, 
 {"OWID_AFR", "", "Africa", "2020-08-07", 1.021711*^6, 13492., 13375.857, 
  22508., 439., 403.714, 762.131, 10.064, 9.978, 16.79, 0.327, 0.301, "", "", 
  "", "", "", "", "", "", "", "", "", "", "", "", "", "", "", "", "", "", "", 
  "", "", "", "", "", "", "", 1.340598113*^9, "", "", "", "", "", "", "", "", 
  "", "", "", "", "", ""}, {"OWID_AFR", "", "Africa", "2020-08-08", 
  1.035919*^6, 14208., 12988.429, 22921., 413., 421., 772.729, 10.598, 9.689, 
  17.098, 0.308, 0.314, "", "", "", "", "", "", "", "", "", "", "", "", "", 
  "", "", "", "", "", "", "", "", "", "", "", "", "", "", "", 1.340598113*^9, 
  "", "", "", "", "", "", "", "", "", "", "", "", "", ""}, 
 {"OWID_AFR", "", "Africa", "2020-08-09", 1.048275*^6, 12356., 12932.286, 
  23279., 358., 424.714, 781.946, 9.217, 9.647, 17.365, 0.267, 0.317, "", "", 
  "", "", "", "", "", "", "", "", "", "", "", "", "", "", "", "", "", "", "", 
  "", "", "", "", "", "", "", 1.340598113*^9, "", "", "", "", "", "", "", "", 
  "", "", "", "", "", ""}, {"OWID_AFR", "", "Africa", "2020-08-10", 
  1.057407*^6, 9132., 12686.429, 23598., 319., 424.429, 788.758, 6.812, 
  9.463, 17.603, 0.238, 0.317, "", "", "", "", "", "", "", "", "", "", "", 
  "", "", "", "", "", "", "", "", "", "", "", "", "", "", "", "", "", 
  1.340598113*^9, "", "", "", "", "", "", "", "", "", "", "", "", "", ""}, 
 {"OWID_AFR", "", "Africa", "2020-08-11", 1.06529*^6, 7883., 12396.143, 
  23867., 269., 395.429, 794.638, 5.88, 9.247, 17.803, 0.201, 0.295, "", "", 
  "", "", "", "", "", "", "", "", "", "", "", "", "", "", "", "", "", "", "", 
  "", "", "", "", "", "", "", 1.340598113*^9, "", "", "", "", "", "", "", "", 
  "", "", "", "", "", ""}, {"OWID_AFR", "", "Africa", "2020-08-12", 
  1.074548*^6, 9258., 11522.429, 24277., 410., 377., 801.544, 6.906, 8.595, 
  18.109, 0.306, 0.281, "", "", "", "", "", "", "", "", "", "", "", "", "", 
  "", "", "", "", "", "", "", "", "", "", "", "", "", "", "", 1.340598113*^9, 
  "", "", "", "", "", "", "", "", "", "", "", "", "", ""}, 
 {"OWID_AFR", "", "Africa", "2020-08-13", 1.084941*^6, 10393., 10960.286, 
  24682., 405., 373.286, 809.296, 7.753, 8.176, 18.411, 0.302, 0.278, "", "", 
  "", "", "", "", "", "", "", "", "", "", "", "", "", "", "", "", "", "", "", 
  "", "", "", "", "", "", "", 1.340598113*^9, "", "", "", "", "", "", "", "", 
  "", "", "", "", "", ""}, {"OWID_AFR", "", "Africa", "2020-08-14", 
  1.097486*^6, 12545., 10825., 25098., 416., 370., 818.654, 9.358, 8.075, 
  18.721, 0.31, 0.276, "", "", "", "", "", "", "", "", "", "", "", "", "", 
  "", "", "", "", "", "", "", "", "", "", "", "", "", "", "", 1.340598113*^9, 
  "", "", "", "", "", "", "", "", "", "", "", "", "", ""}, 
 {"OWID_AFR", "", "Africa", "2020-08-15", 1.109301*^6, 11815., 10483.143, 
  25338., 240., 345.286, 827.467, 8.813, 7.82, 18.901, 0.179, 0.258, "", "", 
  "", "", "", "", "", "", "", "", "", "", "", "", "", "", "", "", "", "", "", 
  "", "", "", "", "", "", "", 1.340598113*^9, "", "", "", "", "", "", "", "", 
  "", "", "", "", "", ""}, {"OWID_AFR", "", "Africa", "2020-08-16", 
  1.119254*^6, 9953., 10139.857, 25633., 295., 336.286, 834.892, 7.424, 
  7.564, 19.121, 0.22, 0.251, "", "", "", "", "", "", "", "", "", "", "", "", 
  "", "", "", "", "", "", "", "", "", "", "", "", "", "", "", "", 
  1.340598113*^9, "", "", "", "", "", "", "", "", "", "", "", "", "", ""}, 
 {"OWID_AFR", "", "Africa", "2020-08-17", 1.128126*^6, 8872., 10102.714, 
  25897., 264., 328.429, 841.509, 6.618, 7.536, 19.317, 0.197, 0.245, "", "", 
  "", "", "", "", "", "", "", "", "", "", "", "", "", "", "", "", "", "", "", 
  "", "", "", "", "", "", "", 1.340598113*^9, "", "", "", "", "", "", "", "", 
  "", "", "", "", "", ""}, {"OWID_AFR", "", "Africa", "2020-08-18", 
  1.136763*^6, 8637., 10210.429, 26312., 415., 349.286, 847.952, 6.443, 
  7.616, 19.627, 0.31, 0.261, "", "", "", "", "", "", "", "", "", "", "", "", 
  "", "", "", "", "", "", "", "", "", "", "", "", "", "", "", "", 
  1.340598113*^9, "", "", "", "", "", "", "", "", "", "", "", "", "", ""}, 
 {"OWID_AFR", "", "Africa", "2020-08-19", 1.147658*^6, 10895., 10444.286, 
  26640., 328., 337.571, 856.079, 8.127, 7.791, 19.872, 0.245, 0.252, "", "", 
  "", "", "", "", "", "", "", "", "", "", "", "", "", "", "", "", "", "", "", 
  "", "", "", "", "", "", "", 1.340598113*^9, "", "", "", "", "", "", "", "", 
  "", "", "", "", "", ""}, {"OWID_AFR", "", "Africa", "2020-08-20", 
  1.158267*^6, 10609., 10475.143, 26977., 337., 327.857, 863.993, 7.914, 
  7.814, 20.123, 0.251, 0.245, "", "", "", "", "", "", "", "", "", "", "", 
  "", "", "", "", "", "", "", "", "", "", "", "", "", "", "", "", "", 
  1.340598113*^9, "", "", "", "", "", "", "", "", "", "", "", "", "", ""}, 
 {"OWID_AFR", "", "Africa", "2020-08-21", 1.168539*^6, 10272., 10150.429, 
  27329., 352., 318.714, 871.655, 7.662, 7.572, 20.386, 0.263, 0.238, "", "", 
  "", "", "", "", "", "", "", "", "", "", "", "", "", "", "", "", "", "", "", 
  "", "", "", "", "", "", "", 1.340598113*^9, "", "", "", "", "", "", "", "", 
  "", "", "", "", "", ""}, {"OWID_AFR", "", "Africa", "2020-08-22", 
  1.178972*^6, 10433., 9953., 27603., 274., 323.571, 879.437, 7.782, 7.424, 
  20.59, 0.204, 0.241, "", "", "", "", "", "", "", "", "", "", "", "", "", 
  "", "", "", "", "", "", "", "", "", "", "", "", "", "", "", 1.340598113*^9, 
  "", "", "", "", "", "", "", "", "", "", "", "", "", ""}, 
 {"OWID_AFR", "", "Africa", "2020-08-23", 1.188025*^6, 9053., 9824.429, 
  27785., 182., 307.429, 886.19, 6.753, 7.328, 20.726, 0.136, 0.229, "", "", 
  "", "", "", "", "", "", "", "", "", "", "", "", "", "", "", "", "", "", "", 
  "", "", "", "", "", "", "", 1.340598113*^9, "", "", "", "", "", "", "", "", 
  "", "", "", "", "", ""}, {"OWID_AFR", "", "Africa", "2020-08-24", 
  1.195541*^6, 7516., 9630.714, 28005., 220., 301.143, 891.797, 5.606, 7.184, 
  20.89, 0.164, 0.225, "", "", "", "", "", "", "", "", "", "", "", "", "", 
  "", "", "", "", "", "", "", "", "", "", "", "", "", "", "", 1.340598113*^9, 
  "", "", "", "", "", "", "", "", "", "", "", "", "", ""}, 
 {"OWID_AFR", "", "Africa", "2020-08-25", 1.203084*^6, 7543., 9474.429, 
  28288., 283., 282.286, 897.423, 5.627, 7.067, 21.101, 0.211, 0.211, "", "", 
  "", "", "", "", "", "", "", "", "", "", "", "", "", "", "", "", "", "", "", 
  "", "", "", "", "", "", "", 1.340598113*^9, "", "", "", "", "", "", "", "", 
  "", "", "", "", "", ""}, {"OWID_AFR", "", "Africa", "2020-08-26", 
  1.211939*^6, 8855., 9183., 28607., 319., 281., 904.029, 6.605, 6.85, 
  21.339, 0.238, 0.21, "", "", "", "", "", "", "", "", "", "", "", "", "", 
  "", "", "", "", "", "", "", "", "", "", "", "", "", "", "", 1.340598113*^9, 
  "", "", "", "", "", "", "", "", "", "", "", "", "", ""}, 
 {"OWID_AFR", "", "Africa", "2020-08-27", 1.220494*^6, 8555., 8889.571, 
  28860., 253., 269., 910.41, 6.381, 6.631, 21.528, 0.189, 0.201, "", "", "", 
  "", "", "", "", "", "", "", "", "", "", "", "", "", "", "", "", "", "", "", 
  "", "", "", "", "", "", 1.340598113*^9, "", "", "", "", "", "", "", "", "", 
  "", "", "", "", ""}, {"OWID_AFR", "", "Africa", "2020-08-28", 1.228603*^6, 
  8109., 8580.571, 29091., 231., 251.714, 916.459, 6.049, 6.401, 21.7, 0.172, 
  0.188, "", "", "", "", "", "", "", "", "", "", "", "", "", "", "", "", "", 
  "", "", "", "", "", "", "", "", "", "", "", 1.340598113*^9, "", "", "", "", 
  "", "", "", "", "", "", "", "", "", ""}, {"OWID_AFR", "", "Africa", 
  "2020-08-29", 1.236973*^6, 8370., 8285.857, 29422., 331., 259.857, 922.702, 
  6.243, 6.181, 21.947, 0.247, 0.194, "", "", "", "", "", "", "", "", "", "", 
  "", "", "", "", "", "", "", "", "", "", "", "", "", "", "", "", "", "", 
  1.340598113*^9, "", "", "", "", "", "", "", "", "", "", "", "", "", ""}, 
 {"OWID_AFR", "", "Africa", "2020-08-30", 1.24543*^6, 8457., 8200.714, 
  29586., 164., 257.286, 929.011, 6.308, 6.117, 22.069, 0.122, 0.192, "", "", 
  "", "", "", "", "", "", "", "", "", "", "", "", "", "", "", "", "", "", "", 
  "", "", "", "", "", "", "", 1.340598113*^9, "", "", "", "", "", "", "", "", 
  "", "", "", "", "", ""}, {"OWID_AFR", "", "Africa", "2020-08-31", 
  1.252235*^6, 6805., 8099.143, 29812., 226., 258.143, 934.087, 5.076, 6.041, 
  22.238, 0.169, 0.193, "", "", "", "", "", "", "", "", "", "", "", "", "", 
  "", "", "", "", "", "", "", "", "", "", "", "", "", "", "", 1.340598113*^9, 
  "", "", "", "", "", "", "", "", "", "", "", "", "", ""}, 
 {"OWID_AFR", "", "Africa", "2020-09-01", 1.259392*^6, 7157., 8044., 30054., 
  242., 252.286, 939.425, 5.339, 6., 22.418, 0.181, 0.188, "", "", "", "", 
  "", "", "", "", "", "", "", "", "", "", "", "", "", "", "", "", "", "", "", 
  "", "", "", "", "", 1.340598113*^9, "", "", "", "", "", "", "", "", "", "", 
  "", "", "", ""}, {"OWID_AFR", "", "Africa", "2020-09-02", 1.268106*^6, 
  8714., 8023.857, 30319., 265., 244.571, 945.926, 6.5, 5.985, 22.616, 0.198, 
  0.182, "", "", "", "", "", "", "", "", "", "", "", "", "", "", "", "", "", 
  "", "", "", "", "", "", "", "", "", "", "", 1.340598113*^9, "", "", "", "", 
  "", "", "", "", "", "", "", "", "", ""}, {"OWID_AFR", "", "Africa", 
  "2020-09-03", 1.275853*^6, 7747., 7908.429, 30616., 297., 250.857, 951.704, 
  5.779, 5.899, 22.838, 0.222, 0.187, "", "", "", "", "", "", "", "", "", "", 
  "", "", "", "", "", "", "", "", "", "", "", "", "", "", "", "", "", "", 
  1.340598113*^9, "", "", "", "", "", "", "", "", "", "", "", "", "", ""}, 
 {"OWID_AFR", "", "Africa", "2020-09-04", 1.284431*^6, 8578., 7975.429, 
  30854., 238., 251.857, 958.103, 6.399, 5.949, 23.015, 0.178, 0.188, "", "", 
  "", "", "", "", "", "", "", "", "", "", "", "", "", "", "", "", "", "", "", 
  "", "", "", "", "", "", "", 1.340598113*^9, "", "", "", "", "", "", "", "", 
  "", "", "", "", "", ""}, {"OWID_AFR", "", "Africa", "2020-09-05", 
  1.291823*^6, 7392., 7835.714, 31079., 225., 236.714, 963.617, 5.514, 5.845, 
  23.183, 0.168, 0.177, "", "", "", "", "", "", "", "", "", "", "", "", "", 
  "", "", "", "", "", "", "", "", "", "", "", "", "", "", "", 1.340598113*^9, 
  "", "", "", "", "", "", "", "", "", "", "", "", "", ""}, 
 {"OWID_AFR", "", "Africa", "2020-09-06", 1.299646*^6, 7823., 7745.143, 
  31303., 224., 245.286, 969.452, 5.835, 5.777, 23.35, 0.167, 0.183, "", "", 
  "", "", "", "", "", "", "", "", "", "", "", "", "", "", "", "", "", "", "", 
  "", "", "", "", "", "", "", 1.340598113*^9, "", "", "", "", "", "", "", "", 
  "", "", "", "", "", ""}, {"OWID_AFR", "", "Africa", "2020-09-07", 
  1.306522*^6, 6876., 7755.286, 31521., 218., 244.143, 974.581, 5.129, 5.785, 
  23.513, 0.163, 0.182, "", "", "", "", "", "", "", "", "", "", "", "", "", 
  "", "", "", "", "", "", "", "", "", "", "", "", "", "", "", 1.340598113*^9, 
  "", "", "", "", "", "", "", "", "", "", "", "", "", ""}, 
 {"OWID_AFR", "", "Africa", "2020-09-08", 1.314201*^6, 7679., 7829.857, 
  31747., 226., 241.857, 980.309, 5.728, 5.841, 23.681, 0.169, 0.18, "", "", 
  "", "", "", "", "", "", "", "", "", "", "", "", "", "", "", "", "", "", "", 
  "", "", "", "", "", "", "", 1.340598113*^9, "", "", "", "", "", "", "", "", 
  "", "", "", "", "", ""}, {"OWID_AFR", "", "Africa", "2020-09-09", 
  1.322496*^6, 8295., 7770., 31939., 192., 231.429, 986.497, 6.188, 5.796, 
  23.824, 0.143, 0.173, "", "", "", "", "", "", "", "", "", "", "", "", "", 
  "", "", "", "", "", "", "", "", "", "", "", "", "", "", "", 1.340598113*^9, 
  "", "", "", "", "", "", "", "", "", "", "", "", "", ""}, 
 {"OWID_AFR", "", "Africa", "2020-09-10", 1.330546*^6, 8050., 7813.286, 
  32124., 185., 215.429, 992.502, 6.005, 5.828, 23.962, 0.138, 0.161, "", "", 
  "", "", "", "", "", "", "", "", "", "", "", "", "", "", "", "", "", "", "", 
  "", "", "", "", "", "", "", 1.340598113*^9, "", "", "", "", "", "", "", "", 
  "", "", "", "", "", ""}, {"OWID_AFR", "", "Africa", "2020-09-11", 
  1.339238*^6, 8692., 7829.571, 32355., 231., 214.429, 998.985, 6.484, 5.84, 
  24.135, 0.172, 0.16, "", "", "", "", "", "", "", "", "", "", "", "", "", 
  "", "", "", "", "", "", "", "", "", "", "", "", "", "", "", 1.340598113*^9, 
  "", "", "", "", "", "", "", "", "", "", "", "", "", ""}, 
 {"OWID_AFR", "", "Africa", "2020-09-12", 1.346648*^6, 7410., 7832.143, 
  32501., 146., 203.143, 1004.513, 5.527, 5.842, 24.244, 0.109, 0.152, "", 
  "", "", "", "", "", "", "", "", "", "", "", "", "", "", "", "", "", "", "", 
  "", "", "", "", "", "", "", "", 1.340598113*^9, "", "", "", "", "", "", "", 
  "", "", "", "", "", "", ""}, {"OWID_AFR", "", "Africa", "2020-09-13", 
  1.353396*^6, 6748., 7678.571, 32622., 121., 188.429, 1009.546, 5.034, 
  5.728, 24.334, 0.09, 0.141, "", "", "", "", "", "", "", "", "", "", "", "", 
  "", "", "", "", "", "", "", "", "", "", "", "", "", "", "", "", 
  1.340598113*^9, "", "", "", "", "", "", "", "", "", "", "", "", "", ""}, 
 {"OWID_AFR", "", "Africa", "2020-09-14", 1.359879*^6, 6483., 7622.429, 
  32793., 171., 181.714, 1014.382, 4.836, 5.686, 24.461, 0.128, 0.136, "", 
  "", "", "", "", "", "", "", "", "", "", "", "", "", "", "", "", "", "", "", 
  "", "", "", "", "", "", "", "", 1.340598113*^9, "", "", "", "", "", "", "", 
  "", "", "", "", "", "", ""}, {"OWID_AFR", "", "Africa", "2020-09-15", 
  1.366445*^6, 6566., 7463.429, 33070., 277., 189., 1019.28, 4.898, 5.567, 
  24.668, 0.207, 0.141, "", "", "", "", "", "", "", "", "", "", "", "", "", 
  "", "", "", "", "", "", "", "", "", "", "", "", "", "", "", 1.340598113*^9, 
  "", "", "", "", "", "", "", "", "", "", "", "", "", ""}, 
 {"OWID_AFR", "", "Africa", "2020-09-16", 1.373755*^6, 7310., 7322.714, 
  33249., 179., 187.143, 1024.733, 5.453, 5.462, 24.802, 0.134, 0.14, "", "", 
  "", "", "", "", "", "", "", "", "", "", "", "", "", "", "", "", "", "", "", 
  "", "", "", "", "", "", "", 1.340598113*^9, "", "", "", "", "", "", "", "", 
  "", "", "", "", "", ""}, {"OWID_AFR", "", "Africa", "2020-09-17", 
  1.38236*^6, 8605., 7402., 33428., 179., 186.286, 1031.152, 6.419, 5.521, 
  24.935, 0.134, 0.139, "", "", "", "", "", "", "", "", "", "", "", "", "", 
  "", "", "", "", "", "", "", "", "", "", "", "", "", "", "", 1.340598113*^9, 
  "", "", "", "", "", "", "", "", "", "", "", "", "", ""}, 
 {"OWID_AFR", "", "Africa", "2020-09-18", 1.390521*^6, 8161., 7326.143, 
  33621., 193., 180.857, 1037.239, 6.088, 5.465, 25.079, 0.144, 0.135, "", 
  "", "", "", "", "", "", "", "", "", "", "", "", "", "", "", "", "", "", "", 
  "", "", "", "", "", "", "", "", 1.340598113*^9, "", "", "", "", "", "", "", 
  "", "", "", "", "", "", ""}, {"OWID_AFR", "", "Africa", "2020-09-19", 
  1.399248*^6, 8727., 7514.286, 33823., 202., 188.857, 1043.749, 6.51, 5.605, 
  25.23, 0.151, 0.141, "", "", "", "", "", "", "", "", "", "", "", "", "", 
  "", "", "", "", "", "", "", "", "", "", "", "", "", "", "", 1.340598113*^9, 
  "", "", "", "", "", "", "", "", "", "", "", "", "", ""}, 
 {"OWID_AFR", "", "Africa", "2020-09-20", 1.407667*^6, 8419., 7753., 33956., 
  133., 190.571, 1050.029, 6.28, 5.783, 25.329, 0.099, 0.142, "", "", "", "", 
  "", "", "", "", "", "", "", "", "", "", "", "", "", "", "", "", "", "", "", 
  "", "", "", "", "", 1.340598113*^9, "", "", "", "", "", "", "", "", "", "", 
  "", "", "", ""}, {"OWID_AFR", "", "Africa", "2020-09-21", 1.413815*^6, 
  6148., 7705.143, 34082., 126., 184.143, 1054.615, 4.586, 5.748, 25.423, 
  0.094, 0.137, "", "", "", "", "", "", "", "", "", "", "", "", "", "", "", 
  "", "", "", "", "", "", "", "", "", "", "", "", "", 1.340598113*^9, "", "", 
  "", "", "", "", "", "", "", "", "", "", "", ""}, 
 {"OWID_AFR", "", "Africa", "2020-09-22", 1.420654*^6, 6839., 7744.143, 
  34322., 240., 178.857, 1059.717, 5.101, 5.777, 25.602, 0.179, 0.133, "", 
  "", "", "", "", "", "", "", "", "", "", "", "", "", "", "", "", "", "", "", 
  "", "", "", "", "", "", "", "", 1.340598113*^9, "", "", "", "", "", "", "", 
  "", "", "", "", "", "", ""}, {"OWID_AFR", "", "Africa", "2020-09-23", 
  1.429381*^6, 8727., 7946.571, 34531., 209., 183.143, 1066.226, 6.51, 5.928, 
  25.758, 0.156, 0.137, "", "", "", "", "", "", "", "", "", "", "", "", "", 
  "", "", "", "", "", "", "", "", "", "", "", "", "", "", "", 1.340598113*^9, 
  "", "", "", "", "", "", "", "", "", "", "", "", "", ""}, 
 {"OWID_AFR", "", "Africa", "2020-09-24", 1.437567*^6, 8186., 7886.714, 
  34706., 175., 182.571, 1072.333, 6.106, 5.883, 25.888, 0.131, 0.136, "", 
  "", "", "", "", "", "", "", "", "", "", "", "", "", "", "", "", "", "", "", 
  "", "", "", "", "", "", "", "", 1.340598113*^9, "", "", "", "", "", "", "", 
  "", "", "", "", "", "", ""}, {"OWID_AFR", "", "Africa", "2020-09-25", 
  1.445544*^6, 7977., 7860.429, 34860., 154., 177., 1078.283, 5.95, 5.863, 
  26.003, 0.115, 0.132, "", "", "", "", "", "", "", "", "", "", "", "", "", 
  "", "", "", "", "", "", "", "", "", "", "", "", "", "", "", 1.340598113*^9, 
  "", "", "", "", "", "", "", "", "", "", "", "", "", ""}, 
 {"OWID_AFR", "", "Africa", "2020-09-26", 1.451954*^6, 6410., 7529.429, 
  35028., 168., 172.143, 1083.064, 4.781, 5.616, 26.129, 0.125, 0.128, "", 
  "", "", "", "", "", "", "", "", "", "", "", "", "", "", "", "", "", "", "", 
  "", "", "", "", "", "", "", "", 1.340598113*^9, "", "", "", "", "", "", "", 
  "", "", "", "", "", "", ""}, {"OWID_AFR", "", "Africa", "2020-09-27", 
  1.460323*^6, 8369., 7522.286, 35163., 135., 172.429, 1089.307, 6.243, 
  5.611, 26.229, 0.101, 0.129, "", "", "", "", "", "", "", "", "", "", "", 
  "", "", "", "", "", "", "", "", "", "", "", "", "", "", "", "", "", 
  1.340598113*^9, "", "", "", "", "", "", "", "", "", "", "", "", "", ""}, 
 {"OWID_AFR", "", "Africa", "2020-09-28", 1.465992*^6, 5669., 7453.857, 
  35457., 294., 196.429, 1093.536, 4.229, 5.56, 26.449, 0.219, 0.147, "", "", 
  "", "", "", "", "", "", "", "", "", "", "", "", "", "", "", "", "", "", "", 
  "", "", "", "", "", "", "", 1.340598113*^9, "", "", "", "", "", "", "", "", 
  "", "", "", "", "", ""}, {"OWID_AFR", "", "Africa", "2020-09-29", 
  1.473501*^6, 7509., 7549.571, 35674., 217., 193.143, 1099.137, 5.601, 
  5.631, 26.611, 0.162, 0.144, "", "", "", "", "", "", "", "", "", "", "", 
  "", "", "", "", "", "", "", "", "", "", "", "", "", "", "", "", "", 
  1.340598113*^9, "", "", "", "", "", "", "", "", "", "", "", "", "", ""}, 
 {"OWID_AFR", "", "Africa", "2020-09-30", 1.481935*^6, 8434., 7507.714, 
  35863., 189., 190.286, 1105.428, 6.291, 5.6, 26.751, 0.141, 0.142, "", "", 
  "", "", "", "", "", "", "", "", "", "", "", "", "", "", "", "", "", "", "", 
  "", "", "", "", "", "", "", 1.340598113*^9, "", "", "", "", "", "", "", "", 
  "", "", "", "", "", ""}, {"OWID_AFR", "", "Africa", "2020-10-01", 
  1.489195*^6, 7260., 7375.429, 36080., 217., 196.286, 1110.844, 5.415, 
  5.502, 26.913, 0.162, 0.146, "", "", "", "", "", "", "", "", "", "", "", 
  "", "", "", "", "", "", "", "", "", "", "", "", "", "", "", "", "", 
  1.340598113*^9, "", "", "", "", "", "", "", "", "", "", "", "", "", ""}, 
 {"OWID_AFR", "", "Africa", "2020-10-02", 1.498052*^6, 8857., 7501.143, 
  36229., 149., 195.571, 1117.45, 6.607, 5.595, 27.025, 0.111, 0.146, "", "", 
  "", "", "", "", "", "", "", "", "", "", "", "", "", "", "", "", "", "", "", 
  "", "", "", "", "", "", "", 1.340598113*^9, "", "", "", "", "", "", "", "", 
  "", "", "", "", "", ""}, {"OWID_AFR", "", "Africa", "2020-10-03", 
  1.506882*^6, 8830., 7846.857, 36340., 111., 187.429, 1124.037, 6.587, 
  5.853, 27.107, 0.083, 0.14, "", "", "", "", "", "", "", "", "", "", "", "", 
  "", "", "", "", "", "", "", "", "", "", "", "", "", "", "", "", 
  1.340598113*^9, "", "", "", "", "", "", "", "", "", "", "", "", "", ""}, 
 {"OWID_AFR", "", "Africa", "2020-10-04", 1.514968*^6, 8086., 7806.429, 
  36510., 170., 192.429, 1130.069, 6.032, 5.823, 27.234, 0.127, 0.144, "", 
  "", "", "", "", "", "", "", "", "", "", "", "", "", "", "", "", "", "", "", 
  "", "", "", "", "", "", "", "", 1.340598113*^9, "", "", "", "", "", "", "", 
  "", "", "", "", "", "", ""}, {"OWID_AFR", "", "Africa", "2020-10-05", 
  1.519682*^6, 4714., 7670., 36638., 128., 168.714, 1133.585, 3.516, 5.721, 
  27.33, 0.095, 0.126, "", "", "", "", "", "", "", "", "", "", "", "", "", 
  "", "", "", "", "", "", "", "", "", "", "", "", "", "", "", 1.340598113*^9, 
  "", "", "", "", "", "", "", "", "", "", "", "", "", ""}, 
 {"OWID_AFR", "", "Africa", "2020-10-06", 1.526279*^6, 6597., 7539.714, 
  36826., 188., 164.571, 1138.506, 4.921, 5.624, 27.47, 0.14, 0.123, "", "", 
  "", "", "", "", "", "", "", "", "", "", "", "", "", "", "", "", "", "", "", 
  "", "", "", "", "", "", "", 1.340598113*^9, "", "", "", "", "", "", "", "", 
  "", "", "", "", "", ""}, {"OWID_AFR", "", "Africa", "2020-10-07", 
  1.536822*^6, 10543., 7841., 37095., 269., 176., 1146.37, 7.864, 5.849, 
  27.67, 0.201, 0.131, "", "", "", "", "", "", "", "", "", "", "", "", "", 
  "", "", "", "", "", "", "", "", "", "", "", "", "", "", "", 1.340598113*^9, 
  "", "", "", "", "", "", "", "", "", "", "", "", "", ""}, 
 {"OWID_AFR", "", "Africa", "2020-10-08", 1.54773*^6, 10908., 8362.143, 
  37393., 298., 187.571, 1154.507, 8.137, 6.238, 27.893, 0.222, 0.14, "", "", 
  "", "", "", "", "", "", "", "", "", "", "", "", "", "", "", "", "", "", "", 
  "", "", "", "", "", "", "", 1.340598113*^9, "", "", "", "", "", "", "", "", 
  "", "", "", "", "", ""}, {"OWID_AFR", "", "Africa", "2020-10-09", 
  1.556287*^6, 8557., 8319.286, 37629., 236., 200., 1160.89, 6.383, 6.206, 
  28.069, 0.176, 0.149, "", "", "", "", "", "", "", "", "", "", "", "", "", 
  "", "", "", "", "", "", "", "", "", "", "", "", "", "", "", 1.340598113*^9, 
  "", "", "", "", "", "", "", "", "", "", "", "", "", ""}, 
 {"OWID_AFR", "", "Africa", "2020-10-10", 1.569821*^6, 13534., 8991.286, 
  37900., 271., 222.857, 1170.986, 10.095, 6.707, 28.271, 0.202, 0.166, "", 
  "", "", "", "", "", "", "", "", "", "", "", "", "", "", "", "", "", "", "", 
  "", "", "", "", "", "", "", "", 1.340598113*^9, "", "", "", "", "", "", "", 
  "", "", "", "", "", "", ""}, {"OWID_AFR", "", "Africa", "2020-10-11", 
  1.578796*^6, 8975., 9118.286, 38108., 208., 228.286, 1177.68, 6.695, 6.802, 
  28.426, 0.155, 0.17, "", "", "", "", "", "", "", "", "", "", "", "", "", 
  "", "", "", "", "", "", "", "", "", "", "", "", "", "", "", 1.340598113*^9, 
  "", "", "", "", "", "", "", "", "", "", "", "", "", ""}, 
 {"OWID_AFR", "", "Africa", "2020-10-12", 1.584683*^6, 5887., 9285.857, 
  38301., 193., 237.571, 1182.072, 4.391, 6.927, 28.57, 0.144, 0.177, "", "", 
  "", "", "", "", "", "", "", "", "", "", "", "", "", "", "", "", "", "", "", 
  "", "", "", "", "", "", "", 1.340598113*^9, "", "", "", "", "", "", "", "", 
  "", "", "", "", "", ""}, {"OWID_AFR", "", "Africa", "2020-10-13", 
  1.592517*^6, 7834., 9462.571, 38572., 271., 249.429, 1187.915, 5.844, 
  7.058, 28.772, 0.202, 0.186, "", "", "", "", "", "", "", "", "", "", "", 
  "", "", "", "", "", "", "", "", "", "", "", "", "", "", "", "", "", 
  1.340598113*^9, "", "", "", "", "", "", "", "", "", "", "", "", "", ""}, 
 {"OWID_AFR", "", "Africa", "2020-10-14", 1.604025*^6, 11508., 9600.429, 
  38835., 263., 248.571, 1196.5, 8.584, 7.161, 28.968, 0.196, 0.185, "", "", 
  "", "", "", "", "", "", "", "", "", "", "", "", "", "", "", "", "", "", "", 
  "", "", "", "", "", "", "", 1.340598113*^9, "", "", "", "", "", "", "", "", 
  "", "", "", "", "", ""}, {"OWID_AFR", "", "Africa", "2020-10-15", 
  1.613141*^6, 9116., 9344.429, 39089., 254., 242.286, 1203.299, 6.8, 6.97, 
  29.158, 0.189, 0.181, "", "", "", "", "", "", "", "", "", "", "", "", "", 
  "", "", "", "", "", "", "", "", "", "", "", "", "", "", "", 1.340598113*^9, 
  "", "", "", "", "", "", "", "", "", "", "", "", "", ""}, 
 {"OWID_AFR", "", "Africa", "2020-10-16", 1.623827*^6, 10686., 9648.571, 
  39296., 207., 238.143, 1211.271, 7.971, 7.197, 29.312, 0.154, 0.178, "", 
  "", "", "", "", "", "", "", "", "", "", "", "", "", "", "", "", "", "", "", 
  "", "", "", "", "", "", "", "", 1.340598113*^9, "", "", "", "", "", "", "", 
  "", "", "", "", "", "", ""}, {"OWID_AFR", "", "Africa", "2020-10-17", 
  1.638089*^6, 14262., 9752.571, 39561., 265., 237.286, 1221.909, 10.639, 
  7.275, 29.51, 0.198, 0.177, "", "", "", "", "", "", "", "", "", "", "", "", 
  "", "", "", "", "", "", "", "", "", "", "", "", "", "", "", "", 
  1.340598113*^9, "", "", "", "", "", "", "", "", "", "", "", "", "", ""}, 
 {"OWID_AFR", "", "Africa", "2020-10-18", 1.646282*^6, 8193., 9640.857, 
  39746., 185., 234., 1228.021, 6.111, 7.191, 29.648, 0.138, 0.175, "", "", 
  "", "", "", "", "", "", "", "", "", "", "", "", "", "", "", "", "", "", "", 
  "", "", "", "", "", "", "", 1.340598113*^9, "", "", "", "", "", "", "", "", 
  "", "", "", "", "", ""}, {"OWID_AFR", "", "Africa", "2020-10-19", 
  1.65597*^6, 9688., 10183.857, 39930., 184., 232.714, 1235.247, 7.227, 
  7.597, 29.785, 0.137, 0.174, "", "", "", "", "", "", "", "", "", "", "", 
  "", "", "", "", "", "", "", "", "", "", "", "", "", "", "", "", "", 
  1.340598113*^9, "", "", "", "", "", "", "", "", "", "", "", "", "", ""}, 
 {"OWID_AFR", "", "Africa", "2020-10-20", 1.665746*^6, 9776., 10461.286, 
  40228., 298., 236.571, 1242.539, 7.292, 7.803, 30.008, 0.222, 0.176, "", 
  "", "", "", "", "", "", "", "", "", "", "", "", "", "", "", "", "", "", "", 
  "", "", "", "", "", "", "", "", 1.340598113*^9, "", "", "", "", "", "", "", 
  "", "", "", "", "", "", ""}, {"OWID_AFR", "", "Africa", "2020-10-21", 
  1.676224*^6, 10478., 10314.143, 40480., 252., 235., 1250.355, 7.816, 7.694, 
  30.195, 0.188, 0.175, "", "", "", "", "", "", "", "", "", "", "", "", "", 
  "", "", "", "", "", "", "", "", "", "", "", "", "", "", "", 1.340598113*^9, 
  "", "", "", "", "", "", "", "", "", "", "", "", "", ""}, 
 {"OWID_AFR", "", "Africa", "2020-10-22", 1.687194*^6, 10970., 10579., 
  40696., 216., 229.571, 1258.538, 8.183, 7.891, 30.357, 0.161, 0.171, "", 
  "", "", "", "", "", "", "", "", "", "", "", "", "", "", "", "", "", "", "", 
  "", "", "", "", "", "", "", "", 1.340598113*^9, "", "", "", "", "", "", "", 
  "", "", "", "", "", "", ""}, {"OWID_AFR", "", "Africa", "2020-10-23", 
  1.697629*^6, 10435., 10543.143, 40920., 224., 232., 1266.322, 7.784, 7.865, 
  30.524, 0.167, 0.173, "", "", "", "", "", "", "", "", "", "", "", "", "", 
  "", "", "", "", "", "", "", "", "", "", "", "", "", "", "", 1.340598113*^9, 
  "", "", "", "", "", "", "", "", "", "", "", "", "", ""}, 
 {"OWID_AFR", "", "Africa", "2020-10-24", 1.709368*^6, 11739., 10182.714, 
  41143., 223., 226., 1275.079, 8.757, 7.596, 30.69, 0.166, 0.169, "", "", 
  "", "", "", "", "", "", "", "", "", "", "", "", "", "", "", "", "", "", "", 
  "", "", "", "", "", "", "", 1.340598113*^9, "", "", "", "", "", "", "", "", 
  "", "", "", "", "", ""}, {"OWID_AFR", "", "Africa", "2020-10-25", 
  1.718462*^6, 9094., 10311.429, 41259., 116., 216.143, 1281.862, 6.784, 
  7.692, 30.777, 0.087, 0.161, "", "", "", "", "", "", "", "", "", "", "", 
  "", "", "", "", "", "", "", "", "", "", "", "", "", "", "", "", "", 
  1.340598113*^9, "", "", "", "", "", "", "", "", "", "", "", "", "", ""}, 
 {"OWID_AFR", "", "Africa", "2020-10-26", 1.72918*^6, 10718., 10458.571, 
  41607., 348., 239.571, 1289.857, 7.995, 7.801, 31.036, 0.26, 0.179, "", "", 
  "", "", "", "", "", "", "", "", "", "", "", "", "", "", "", "", "", "", "", 
  "", "", "", "", "", "", "", 1.340598113*^9, "", "", "", "", "", "", "", "", 
  "", "", "", "", "", ""}, {"OWID_AFR", "", "Africa", "2020-10-27", 
  1.73783*^6, 8650., 10297.714, 41789., 182., 223., 1296.309, 6.452, 7.681, 
  31.172, 0.136, 0.166, "", "", "", "", "", "", "", "", "", "", "", "", "", 
  "", "", "", "", "", "", "", "", "", "", "", "", "", "", "", 1.340598113*^9, 
  "", "", "", "", "", "", "", "", "", "", "", "", "", ""}, 
 {"OWID_AFR", "", "Africa", "2020-10-28", 1.74973*^6, 11900., 10500.857, 
  42135., 346., 236.429, 1305.186, 8.877, 7.833, 31.43, 0.258, 0.176, "", "", 
  "", "", "", "", "", "", "", "", "", "", "", "", "", "", "", "", "", "", "", 
  "", "", "", "", "", "", "", 1.340598113*^9, "", "", "", "", "", "", "", "", 
  "", "", "", "", "", ""}, {"OWID_AFR", "", "Africa", "2020-10-29", 
  1.760801*^6, 11071., 10515.286, 42337., 202., 234.429, 1313.444, 8.258, 
  7.844, 31.581, 0.151, 0.175, "", "", "", "", "", "", "", "", "", "", "", 
  "", "", "", "", "", "", "", "", "", "", "", "", "", "", "", "", "", 
  1.340598113*^9, "", "", "", "", "", "", "", "", "", "", "", "", "", ""}, 
 {"OWID_AFR", "", "Africa", "2020-10-30", 1.7744*^6, 13599., 10967.286, 
  42629., 292., 244.143, 1323.588, 10.144, 8.181, 31.798, 0.218, 0.182, "", 
  "", "", "", "", "", "", "", "", "", "", "", "", "", "", "", "", "", "", "", 
  "", "", "", "", "", "", "", "", 1.340598113*^9, "", "", "", "", "", "", "", 
  "", "", "", "", "", "", ""}, {"OWID_AFR", "", "Africa", "2020-10-31", 
  1.785474*^6, 11074., 10872.286, 42853., 224., 244.286, 1331.849, 8.26, 
  8.11, 31.966, 0.167, 0.182, "", "", "", "", "", "", "", "", "", "", "", "", 
  "", "", "", "", "", "", "", "", "", "", "", "", "", "", "", "", 
  1.340598113*^9, "", "", "", "", "", "", "", "", "", "", "", "", "", ""}, 
 {"OWID_AFR", "", "Africa", "2020-11-01", 1.79577*^6, 10296., 11044., 43175., 
  322., 273.714, 1339.529, 7.68, 8.238, 32.206, 0.24, 0.204, "", "", "", "", 
  "", "", "", "", "", "", "", "", "", "", "", "", "", "", "", "", "", "", "", 
  "", "", "", "", "", 1.340598113*^9, "", "", "", "", "", "", "", "", "", "", 
  "", "", "", ""}, {"OWID_AFR", "", "Africa", "2020-11-02", 1.803356*^6, 
  7586., 10596.571, 43389., 214., 254.571, 1345.188, 5.659, 7.904, 32.365, 
  0.16, 0.19, "", "", "", "", "", "", "", "", "", "", "", "", "", "", "", "", 
  "", "", "", "", "", "", "", "", "", "", "", "", 1.340598113*^9, "", "", "", 
  "", "", "", "", "", "", "", "", "", "", ""}, 
 {"OWID_AFR", "", "Africa", "2020-11-03", 1.81423*^6, 10874., 10914.286, 
  43705., 316., 273.714, 1353.299, 8.111, 8.141, 32.601, 0.236, 0.204, "", 
  "", "", "", "", "", "", "", "", "", "", "", "", "", "", "", "", "", "", "", 
  "", "", "", "", "", "", "", "", 1.340598113*^9, "", "", "", "", "", "", "", 
  "", "", "", "", "", "", ""}, {"OWID_AFR", "", "Africa", "2020-11-04", 
  1.828232*^6, 14002., 11214.571, 43940., 235., 257.857, 1363.744, 10.445, 
  8.365, 32.776, 0.175, 0.192, "", "", "", "", "", "", "", "", "", "", "", 
  "", "", "", "", "", "", "", "", "", "", "", "", "", "", "", "", "", 
  1.340598113*^9, "", "", "", "", "", "", "", "", "", "", "", "", "", ""}, 
 {"OWID_AFR", "", "Africa", "2020-11-05", 1.843625*^6, 15393., 11832., 
  44244., 304., 272.429, 1375.226, 11.482, 8.826, 33.003, 0.227, 0.203, "", 
  "", "", "", "", "", "", "", "", "", "", "", "", "", "", "", "", "", "", "", 
  "", "", "", "", "", "", "", "", 1.340598113*^9, "", "", "", "", "", "", "", 
  "", "", "", "", "", "", ""}, {"OWID_AFR", "", "Africa", "2020-11-06", 
  1.855345*^6, 11720., 11563.571, 44467., 223., 262.571, 1383.968, 8.742, 
  8.626, 33.17, 0.166, 0.196, "", "", "", "", "", "", "", "", "", "", "", "", 
  "", "", "", "", "", "", "", "", "", "", "", "", "", "", "", "", 
  1.340598113*^9, "", "", "", "", "", "", "", "", "", "", "", "", "", ""}, 
 {"OWID_AFR", "", "Africa", "2020-11-07", 1.870362*^6, 15017., 12126.857, 
  44845., 378., 284.571, 1395.17, 11.202, 9.046, 33.451, 0.282, 0.212, "", 
  "", "", "", "", "", "", "", "", "", "", "", "", "", "", "", "", "", "", "", 
  "", "", "", "", "", "", "", "", 1.340598113*^9, "", "", "", "", "", "", "", 
  "", "", "", "", "", "", ""}, {"OWID_AFR", "", "Africa", "2020-11-08", 
  1.88286*^6, 12498., 12441.429, 45360., 515., 312.143, 1404.493, 9.323, 
  9.281, 33.836, 0.384, 0.233, "", "", "", "", "", "", "", "", "", "", "", 
  "", "", "", "", "", "", "", "", "", "", "", "", "", "", "", "", "", 
  1.340598113*^9, "", "", "", "", "", "", "", "", "", "", "", "", "", ""}, 
 {"OWID_AFR", "", "Africa", "2020-11-09", 1.891749*^6, 8889., 12627.571, 
  45609., 249., 317.143, 1411.123, 6.631, 9.419, 34.021, 0.186, 0.237, "", 
  "", "", "", "", "", "", "", "", "", "", "", "", "", "", "", "", "", "", "", 
  "", "", "", "", "", "", "", "", 1.340598113*^9, "", "", "", "", "", "", "", 
  "", "", "", "", "", "", ""}, {"OWID_AFR", "", "Africa", "2020-11-10", 
  1.904922*^6, 13173., 12956., 45950., 341., 320.714, 1420.949, 9.826, 9.664, 
  34.276, 0.254, 0.239, "", "", "", "", "", "", "", "", "", "", "", "", "", 
  "", "", "", "", "", "", "", "", "", "", "", "", "", "", "", 1.340598113*^9, 
  "", "", "", "", "", "", "", "", "", "", "", "", "", ""}, 
 {"OWID_AFR", "", "Africa", "2020-11-11", 1.918922*^6, 14000., 12955.714, 
  46282., 332., 334.571, 1431.392, 10.443, 9.664, 34.523, 0.248, 0.25, "", 
  "", "", "", "", "", "", "", "", "", "", "", "", "", "", "", "", "", "", "", 
  "", "", "", "", "", "", "", "", 1.340598113*^9, "", "", "", "", "", "", "", 
  "", "", "", "", "", "", ""}, {"OWID_AFR", "", "Africa", "2020-11-12", 
  1.934703*^6, 15781., 13011.143, 46551., 269., 329.571, 1443.164, 11.772, 
  9.705, 34.724, 0.201, 0.246, "", "", "", "", "", "", "", "", "", "", "", 
  "", "", "", "", "", "", "", "", "", "", "", "", "", "", "", "", "", 
  1.340598113*^9, "", "", "", "", "", "", "", "", "", "", "", "", "", ""}, 
 {"OWID_AFR", "", "Africa", "2020-11-13", 1.949381*^6, 14678., 13433.714, 
  46831., 280., 337.714, 1454.113, 10.949, 10.021, 34.933, 0.209, 0.252, "", 
  "", "", "", "", "", "", "", "", "", "", "", "", "", "", "", "", "", "", "", 
  "", "", "", "", "", "", "", "", 1.340598113*^9, "", "", "", "", "", "", "", 
  "", "", "", "", "", "", ""}, {"OWID_AFR", "", "Africa", "2020-11-14", 
  1.963452*^6, 14071., 13298.571, 47066., 235., 317.286, 1464.609, 10.496, 
  9.92, 35.108, 0.175, 0.237, "", "", "", "", "", "", "", "", "", "", "", "", 
  "", "", "", "", "", "", "", "", "", "", "", "", "", "", "", "", 
  1.340598113*^9, "", "", "", "", "", "", "", "", "", "", "", "", "", ""}, 
 {"OWID_AFR", "", "Africa", "2020-11-15", 1.976022*^6, 12570., 13308.857, 
  47362., 296., 286., 1473.985, 9.376, 9.928, 35.329, 0.221, 0.213, "", "", 
  "", "", "", "", "", "", "", "", "", "", "", "", "", "", "", "", "", "", "", 
  "", "", "", "", "", "", "", 1.340598113*^9, "", "", "", "", "", "", "", "", 
  "", "", "", "", "", ""}, {"OWID_AFR", "", "Africa", "2020-11-16", 
  1.986326*^6, 10304., 13511., 47641., 279., 290.286, 1481.671, 7.686, 
  10.078, 35.537, 0.208, 0.217, "", "", "", "", "", "", "", "", "", "", "", 
  "", "", "", "", "", "", "", "", "", "", "", "", "", "", "", "", "", 
  1.340598113*^9, "", "", "", "", "", "", "", "", "", "", "", "", "", ""}, 
 {"OWID_AFR", "", "Africa", "2020-11-17", 1.999194*^6, 12868., 13467.429, 
  48034., 393., 297.714, 1491.27, 9.599, 10.046, 35.83, 0.293, 0.222, "", "", 
  "", "", "", "", "", "", "", "", "", "", "", "", "", "", "", "", "", "", "", 
  "", "", "", "", "", "", "", 1.340598113*^9, "", "", "", "", "", "", "", "", 
  "", "", "", "", "", ""}, {"OWID_AFR", "", "Africa", "2020-11-18", 
  2.014495*^6, 15301., 13653.286, 48426., 392., 306.286, 1502.684, 11.414, 
  10.184, 36.123, 0.292, 0.228, "", "", "", "", "", "", "", "", "", "", "", 
  "", "", "", "", "", "", "", "", "", "", "", "", "", "", "", "", "", 
  1.340598113*^9, "", "", "", "", "", "", "", "", "", "", "", "", "", ""}, 
 {"OWID_AFR", "", "Africa", "2020-11-19", 2.028429*^6, 13934., 13389.429, 
  48702., 276., 307.286, 1513.078, 10.394, 9.988, 36.329, 0.206, 0.229, "", 
  "", "", "", "", "", "", "", "", "", "", "", "", "", "", "", "", "", "", "", 
  "", "", "", "", "", "", "", "", 1.340598113*^9, "", "", "", "", "", "", "", 
  "", "", "", "", "", "", ""}, {"OWID_AFR", "", "Africa", "2020-11-20", 
  2.044162*^6, 15733., 13540.143, 49114., 412., 326.143, 1524.813, 11.736, 
  10.1, 36.636, 0.307, 0.243, "", "", "", "", "", "", "", "", "", "", "", "", 
  "", "", "", "", "", "", "", "", "", "", "", "", "", "", "", "", 
  1.340598113*^9, "", "", "", "", "", "", "", "", "", "", "", "", "", ""}, 
 {"OWID_AFR", "", "Africa", "2020-11-21", 2.057518*^6, 13356., 13438., 
  49428., 314., 337.429, 1534.776, 9.963, 10.024, 36.87, 0.234, 0.252, "", 
  "", "", "", "", "", "", "", "", "", "", "", "", "", "", "", "", "", "", "", 
  "", "", "", "", "", "", "", "", 1.340598113*^9, "", "", "", "", "", "", "", 
  "", "", "", "", "", "", ""}, {"OWID_AFR", "", "Africa", "2020-11-22", 
  2.070297*^6, 12779., 13467.857, 49718., 290., 336.571, 1544.308, 9.532, 
  10.046, 37.086, 0.216, 0.251, "", "", "", "", "", "", "", "", "", "", "", 
  "", "", "", "", "", "", "", "", "", "", "", "", "", "", "", "", "", 
  1.340598113*^9, "", "", "", "", "", "", "", "", "", "", "", "", "", ""}, 
 {"OWID_AFR", "", "Africa", "2020-11-23", 2.080374*^6, 10077., 13435.429, 
  49987., 269., 335.143, 1551.825, 7.517, 10.022, 37.287, 0.201, 0.25, "", 
  "", "", "", "", "", "", "", "", "", "", "", "", "", "", "", "", "", "", "", 
  "", "", "", "", "", "", "", "", 1.340598113*^9, "", "", "", "", "", "", "", 
  "", "", "", "", "", "", ""}, {"OWID_AFR", "", "Africa", "2020-11-24", 
  2.092877*^6, 12503., 13383.286, 50331., 344., 328.143, 1561.152, 9.326, 
  9.983, 37.544, 0.257, 0.245, "", "", "", "", "", "", "", "", "", "", "", 
  "", "", "", "", "", "", "", "", "", "", "", "", "", "", "", "", "", 
  1.340598113*^9, "", "", "", "", "", "", "", "", "", "", "", "", "", ""}, 
 {"OWID_AFR", "", "Africa", "2020-11-25", 2.107544*^6, 14667., 13292.714, 
  50647., 316., 317.286, 1572.092, 10.941, 9.916, 37.779, 0.236, 0.237, "", 
  "", "", "", "", "", "", "", "", "", "", "", "", "", "", "", "", "", "", "", 
  "", "", "", "", "", "", "", "", 1.340598113*^9, "", "", "", "", "", "", "", 
  "", "", "", "", "", "", ""}, {"OWID_AFR", "", "Africa", "2020-11-26", 
  2.121467*^6, 13923., 13291.143, 50944., 297., 320.286, 1582.478, 10.386, 
  9.914, 38.001, 0.222, 0.239, "", "", "", "", "", "", "", "", "", "", "", 
  "", "", "", "", "", "", "", "", "", "", "", "", "", "", "", "", "", 
  1.340598113*^9, "", "", "", "", "", "", "", "", "", "", "", "", "", ""}, 
 {"OWID_AFR", "", "Africa", "2020-11-27", 2.137506*^6, 16039., 13334.857, 
  51264., 320., 307.143, 1594.442, 11.964, 9.947, 38.24, 0.239, 0.229, "", 
  "", "", "", "", "", "", "", "", "", "", "", "", "", "", "", "", "", "", "", 
  "", "", "", "", "", "", "", "", 1.340598113*^9, "", "", "", "", "", "", "", 
  "", "", "", "", "", "", ""}, {"OWID_AFR", "", "Africa", "2020-11-28", 
  2.150902*^6, 13396., 13340.571, 51499., 235., 295.857, 1604.435, 9.993, 
  9.951, 38.415, 0.175, 0.221, "", "", "", "", "", "", "", "", "", "", "", 
  "", "", "", "", "", "", "", "", "", "", "", "", "", "", "", "", "", 
  1.340598113*^9, "", "", "", "", "", "", "", "", "", "", "", "", "", ""}, 
 {"OWID_AFR", "", "Africa", "2020-11-29", 2.163973*^6, 13071., 13382.286, 
  51723., 224., 286.429, 1614.185, 9.75, 9.982, 38.582, 0.167, 0.214, "", "", 
  "", "", "", "", "", "", "", "", "", "", "", "", "", "", "", "", "", "", "", 
  "", "", "", "", "", "", "", 1.340598113*^9, "", "", "", "", "", "", "", "", 
  "", "", "", "", "", ""}, {"OWID_AFR", "", "Africa", "2020-11-30", 
  2.174323*^6, 10350., 13421.286, 51992., 269., 286.429, 1621.905, 7.72, 
  10.011, 38.783, 0.201, 0.214, "", "", "", "", "", "", "", "", "", "", "", 
  "", "", "", "", "", "", "", "", "", "", "", "", "", "", "", "", "", 
  1.340598113*^9, "", "", "", "", "", "", "", "", "", "", "", "", "", ""}, 
 {"OWID_AFR", "", "Africa", "2020-12-01", 2.185161*^6, 10838., 13183.429, 
  52250., 258., 274.143, 1629.99, 8.084, 9.834, 38.975, 0.192, 0.204, "", "", 
  "", "", "", "", "", "", "", "", "", "", "", "", "", "", "", "", "", "", "", 
  "", "", "", "", "", "", "", 1.340598113*^9, "", "", "", "", "", "", "", "", 
  "", "", "", "", "", ""}, {"OWID_AFR", "", "Africa", "2020-12-02", 
  2.201574*^6, 16413., 13432.857, 52580., 330., 276.143, 1642.233, 12.243, 
  10.02, 39.221, 0.246, 0.206, "", "", "", "", "", "", "", "", "", "", "", 
  "", "", "", "", "", "", "", "", "", "", "", "", "", "", "", "", "", 
  1.340598113*^9, "", "", "", "", "", "", "", "", "", "", "", "", "", ""}, 
 {"OWID_AFR", "", "Africa", "2020-12-03", 2.217275*^6, 15701., 13686.857, 
  52847., 267., 271.857, 1653.945, 11.712, 10.21, 39.42, 0.199, 0.203, "", 
  "", "", "", "", "", "", "", "", "", "", "", "", "", "", "", "", "", "", "", 
  "", "", "", "", "", "", "", "", 1.340598113*^9, "", "", "", "", "", "", "", 
  "", "", "", "", "", "", ""}, {"OWID_AFR", "", "Africa", "2020-12-04", 
  2.235257*^6, 17982., 13964.429, 53277., 430., 287.571, 1667.358, 13.413, 
  10.417, 39.741, 0.321, 0.215, "", "", "", "", "", "", "", "", "", "", "", 
  "", "", "", "", "", "", "", "", "", "", "", "", "", "", "", "", "", 
  1.340598113*^9, "", "", "", "", "", "", "", "", "", "", "", "", "", ""}, 
 {"OWID_AFR", "", "Africa", "2020-12-05", 2.249959*^6, 14702., 14151., 
  53564., 287., 295., 1678.325, 10.967, 10.556, 39.955, 0.214, 0.22, "", "", 
  "", "", "", "", "", "", "", "", "", "", "", "", "", "", "", "", "", "", "", 
  "", "", "", "", "", "", "", 1.340598113*^9, "", "", "", "", "", "", "", "", 
  "", "", "", "", "", ""}, {"OWID_AFR", "", "Africa", "2020-12-06", 
  2.263422*^6, 13463., 14207., 53870., 306., 306.714, 1688.367, 10.043, 
  10.598, 40.184, 0.228, 0.229, "", "", "", "", "", "", "", "", "", "", "", 
  "", "", "", "", "", "", "", "", "", "", "", "", "", "", "", "", "", 
  1.340598113*^9, "", "", "", "", "", "", "", "", "", "", "", "", "", ""}, 
 {"OWID_AFR", "", "Africa", "2020-12-07", 2.27405*^6, 10628., 14246.714, 
  54118., 248., 303.714, 1696.295, 7.928, 10.627, 40.369, 0.185, 0.227, "", 
  "", "", "", "", "", "", "", "", "", "", "", "", "", "", "", "", "", "", "", 
  "", "", "", "", "", "", "", "", 1.340598113*^9, "", "", "", "", "", "", "", 
  "", "", "", "", "", "", ""}, {"OWID_AFR", "", "Africa", "2020-12-08", 
  2.287308*^6, 13258., 14592.429, 54520., 402., 324.286, 1706.185, 9.89, 
  10.885, 40.668, 0.3, 0.242, "", "", "", "", "", "", "", "", "", "", "", "", 
  "", "", "", "", "", "", "", "", "", "", "", "", "", "", "", "", 
  1.340598113*^9, "", "", "", "", "", "", "", "", "", "", "", "", "", ""}, 
 {"OWID_AFR", "", "Africa", "2020-12-09", 2.306704*^6, 19396., 15018.571, 
  54870., 350., 327.143, 1720.653, 14.468, 11.203, 40.929, 0.261, 0.244, "", 
  "", "", "", "", "", "", "", "", "", "", "", "", "", "", "", "", "", "", "", 
  "", "", "", "", "", "", "", "", 1.340598113*^9, "", "", "", "", "", "", "", 
  "", "", "", "", "", "", ""}, {"OWID_AFR", "", "Africa", "2020-12-10", 
  2.325838*^6, 19134., 15509., 55264., 394., 345.286, 1734.926, 14.273, 
  11.569, 41.223, 0.294, 0.258, "", "", "", "", "", "", "", "", "", "", "", 
  "", "", "", "", "", "", "", "", "", "", "", "", "", "", "", "", "", 
  1.340598113*^9, "", "", "", "", "", "", "", "", "", "", "", "", "", ""}, 
 {"OWID_AFR", "", "Africa", "2020-12-11", 2.344919*^6, 19081., 15666., 
  55662., 398., 340.714, 1749.159, 14.233, 11.686, 41.52, 0.297, 0.254, "", 
  "", "", "", "", "", "", "", "", "", "", "", "", "", "", "", "", "", "", "", 
  "", "", "", "", "", "", "", "", 1.340598113*^9, "", "", "", "", "", "", "", 
  "", "", "", "", "", "", ""}, {"OWID_AFR", "", "Africa", "2020-12-12", 
  2.363052*^6, 18133., 16156.143, 55988., 326., 346.286, 1762.685, 13.526, 
  12.051, 41.763, 0.243, 0.258, "", "", "", "", "", "", "", "", "", "", "", 
  "", "", "", "", "", "", "", "", "", "", "", "", "", "", "", "", "", 
  1.340598113*^9, "", "", "", "", "", "", "", "", "", "", "", "", "", ""}, 
 {"OWID_AFR", "", "Africa", "2020-12-13", 2.379274*^6, 16222., 16550.286, 
  56334., 346., 352., 1774.785, 12.101, 12.345, 42.022, 0.258, 0.263, "", "", 
  "", "", "", "", "", "", "", "", "", "", "", "", "", "", "", "", "", "", "", 
  "", "", "", "", "", "", "", 1.340598113*^9, "", "", "", "", "", "", "", "", 
  "", "", "", "", "", ""}, {"OWID_AFR", "", "Africa", "2020-12-14", 
  2.390592*^6, 11318., 16648.857, 56645., 311., 361., 1783.228, 8.443, 
  12.419, 42.254, 0.232, 0.269, "", "", "", "", "", "", "", "", "", "", "", 
  "", "", "", "", "", "", "", "", "", "", "", "", "", "", "", "", "", 
  1.340598113*^9, "", "", "", "", "", "", "", "", "", "", "", "", "", ""}, 
 {"OWID_AFR", "", "Africa", "2020-12-15", 2.408594*^6, 18002., 17326.571, 
  57072., 427., 364.571, 1796.656, 13.428, 12.925, 42.572, 0.319, 0.272, "", 
  "", "", "", "", "", "", "", "", "", "", "", "", "", "", "", "", "", "", "", 
  "", "", "", "", "", "", "", "", 1.340598113*^9, "", "", "", "", "", "", "", 
  "", "", "", "", "", "", ""}, {"OWID_AFR", "", "Africa", "2020-12-16", 
  2.429819*^6, 21225., 17587.857, 57418., 346., 364., 1812.489, 15.832, 
  13.119, 42.83, 0.258, 0.272, "", "", "", "", "", "", "", "", "", "", "", 
  "", "", "", "", "", "", "", "", "", "", "", "", "", "", "", "", "", 
  1.340598113*^9, "", "", "", "", "", "", "", "", "", "", "", "", "", ""}, 
 {"OWID_AFR", "", "Africa", "2020-12-17", 2.450327*^6, 20508., 17784.143, 
  57814., 396., 364.286, 1827.786, 15.298, 13.266, 43.126, 0.295, 0.272, "", 
  "", "", "", "", "", "", "", "", "", "", "", "", "", "", "", "", "", "", "", 
  "", "", "", "", "", "", "", "", 1.340598113*^9, "", "", "", "", "", "", "", 
  "", "", "", "", "", "", ""}, {"OWID_AFR", "", "Africa", "2020-12-18", 
  2.469647*^6, 19320., 17818.286, 58310., 496., 378.286, 1842.198, 14.411, 
  13.291, 43.496, 0.37, 0.282, "", "", "", "", "", "", "", "", "", "", "", 
  "", "", "", "", "", "", "", "", "", "", "", "", "", "", "", "", "", 
  1.340598113*^9, "", "", "", "", "", "", "", "", "", "", "", "", "", ""}, 
 {"OWID_AFR", "", "Africa", "2020-12-19", 2.490907*^6, 21260., 18265., 
  58759., 449., 395.857, 1858.056, 15.859, 13.625, 43.83, 0.335, 0.295, "", 
  "", "", "", "", "", "", "", "", "", "", "", "", "", "", "", "", "", "", "", 
  "", "", "", "", "", "", "", "", 1.340598113*^9, "", "", "", "", "", "", "", 
  "", "", "", "", "", "", ""}, {"OWID_AFR", "", "Africa", "2020-12-20", 
  2.509333*^6, 18426., 18579.857, 59099., 340., 395., 1871.801, 13.745, 
  13.859, 44.084, 0.254, 0.295, "", "", "", "", "", "", "", "", "", "", "", 
  "", "", "", "", "", "", "", "", "", "", "", "", "", "", "", "", "", 
  1.340598113*^9, "", "", "", "", "", "", "", "", "", "", "", "", "", ""}, 
 {"OWID_AFR", "", "Africa", "2020-12-21", 2.526114*^6, 16781., 19360.286, 
  59528., 429., 411.857, 1884.319, 12.518, 14.442, 44.404, 0.32, 0.307, "", 
  "", "", "", "", "", "", "", "", "", "", "", "", "", "", "", "", "", "", "", 
  "", "", "", "", "", "", "", "", 1.340598113*^9, "", "", "", "", "", "", "", 
  "", "", "", "", "", "", ""}, {"OWID_AFR", "", "Africa", "2020-12-22", 
  2.5461*^6, 19986., 19643.714, 60057., 529., 426.429, 1899.227, 14.908, 
  14.653, 44.799, 0.395, 0.318, "", "", "", "", "", "", "", "", "", "", "", 
  "", "", "", "", "", "", "", "", "", "", "", "", "", "", "", "", "", 
  1.340598113*^9, "", "", "", "", "", "", "", "", "", "", "", "", "", ""}, 
 {"OWID_AFR", "", "Africa", "2020-12-23", 2.571829*^6, 25729., 20287.143, 
  60877., 820., 494.143, 1918.419, 19.192, 15.133, 45.41, 0.612, 0.369, "", 
  "", "", "", "", "", "", "", "", "", "", "", "", "", "", "", "", "", "", "", 
  "", "", "", "", "", "", "", "", 1.340598113*^9, "", "", "", "", "", "", "", 
  "", "", "", "", "", "", ""}, {"OWID_AFR", "", "Africa", "2020-12-24", 
  2.598873*^6, 27044., 21220.857, 61431., 554., 516.714, 1938.592, 20.173, 
  15.829, 45.824, 0.413, 0.385, "", "", "", "", "", "", "", "", "", "", "", 
  "", "", "", "", "", "", "", "", "", "", "", "", "", "", "", "", "", 
  1.340598113*^9, "", "", "", "", "", "", "", "", "", "", "", "", "", ""}, 
 {"OWID_AFR", "", "Africa", "2020-12-25", 2.624658*^6, 25785., 22144.429, 
  61955., 524., 520.714, 1957.826, 19.234, 16.518, 46.214, 0.391, 0.388, "", 
  "", "", "", "", "", "", "", "", "", "", "", "", "", "", "", "", "", "", "", 
  "", "", "", "", "", "", "", "", 1.340598113*^9, "", "", "", "", "", "", "", 
  "", "", "", "", "", "", ""}, {"OWID_AFR", "", "Africa", "2020-12-26", 
  2.646039*^6, 21381., 22161.714, 62374., 419., 516.429, 1973.775, 15.949, 
  16.531, 46.527, 0.313, 0.385, "", "", "", "", "", "", "", "", "", "", "", 
  "", "", "", "", "", "", "", "", "", "", "", "", "", "", "", "", "", 
  1.340598113*^9, "", "", "", "", "", "", "", "", "", "", "", "", "", ""}, 
 {"OWID_AFR", "", "Africa", "2020-12-27", 2.664714*^6, 18675., 22197.286, 
  62806., 432., 529.571, 1987.705, 13.93, 16.558, 46.849, 0.322, 0.395, "", 
  "", "", "", "", "", "", "", "", "", "", "", "", "", "", "", "", "", "", "", 
  "", "", "", "", "", "", "", "", 1.340598113*^9, "", "", "", "", "", "", "", 
  "", "", "", "", "", "", ""}, {"OWID_AFR", "", "Africa", "2020-12-28", 
  2.679925*^6, 15211., 21973., 63351., 545., 546.143, 1999.052, 11.346, 
  16.39, 47.256, 0.407, 0.407, "", "", "", "", "", "", "", "", "", "", "", 
  "", "", "", "", "", "", "", "", "", "", "", "", "", "", "", "", "", 
  1.340598113*^9, "", "", "", "", "", "", "", "", "", "", "", "", "", ""}, 
 {"OWID_AFR", "", "Africa", "2020-12-29", 2.700053*^6, 20128., 21993.286, 
  64068., 717., 573., 2014.066, 15.014, 16.406, 47.791, 0.535, 0.427, "", "", 
  "", "", "", "", "", "", "", "", "", "", "", "", "", "", "", "", "", "", "", 
  "", "", "", "", "", "", "", 1.340598113*^9, "", "", "", "", "", "", "", "", 
  "", "", "", "", "", ""}, {"OWID_AFR", "", "Africa", "2020-12-30", 
  2.73067*^6, 30617., 22691.571, 64769., 701., 556., 2036.904, 22.838, 
  16.926, 48.314, 0.523, 0.415, "", "", "", "", "", "", "", "", "", "", "", 
  "", "", "", "", "", "", "", "", "", "", "", "", "", "", "", "", "", 
  1.340598113*^9, "", "", "", "", "", "", "", "", "", "", "", "", "", ""}, 
 {"OWID_AFR", "", "Africa", "2020-12-31", 2.760459*^6, 29789., 23083.714, 
  65468., 699., 576.714, 2059.125, 22.221, 17.219, 48.835, 0.521, 0.43, "", 
  "", "", "", "", "", "", "", "", "", "", "", "", "", "", "", "", "", "", "", 
  "", "", "", "", "", "", "", "", 1.340598113*^9, "", "", "", "", "", "", "", 
  "", "", "", "", "", "", ""}, {"OWID_AFR", "", "Africa", "2021-01-01", 
  2.788167*^6, 27708., 23358.429, 66126., 658., 595.857, 2079.793, 20.668, 
  17.424, 49.326, 0.491, 0.444, "", "", "", "", "", "", "", "", "", "", "", 
  "", "", "", "", "", "", "", "", "", "", "", "", "", "", "", "", "", 
  1.340598113*^9, "", "", "", "", "", "", "", "", "", "", "", "", "", ""}, 
 {"OWID_AFR", "", "Africa", "2021-01-02", 2.811086*^6, 22919., 23578.143, 
  66641., 515., 609.571, 2096.889, 17.096, 17.588, 49.71, 0.384, 0.455, "", 
  "", "", "", "", "", "", "", "", "", "", "", "", "", "", "", "", "", "", "", 
  "", "", "", "", "", "", "", "", 1.340598113*^9, "", "", "", "", "", "", "", 
  "", "", "", "", "", "", ""}, {"OWID_AFR", "", "Africa", "2021-01-03", 
  2.833076*^6, 21990., 24051.714, 67246., 605., 634.286, 2113.293, 16.403, 
  17.941, 50.161, 0.451, 0.473, "", "", "", "", "", "", "", "", "", "", "", 
  "", "", "", "", "", "", "", "", "", "", "", "", "", "", "", "", "", 
  1.340598113*^9, "", "", "", "", "", "", "", "", "", "", "", "", "", ""}, 
 {"OWID_AFR", "", "Africa", "2021-01-04", 2.854868*^6, 21792., 24991.857, 
  67931., 685., 654.286, 2129.548, 16.255, 18.642, 50.672, 0.511, 0.488, "", 
  "", "", "", "", "", "", "", "", "", "", "", "", "", "", "", "", "", "", "", 
  "", "", "", "", "", "", "", "", 1.340598113*^9, "", "", "", "", "", "", "", 
  "", "", "", "", "", "", ""}, {"OWID_AFR", "", "Africa", "2021-01-05", 
  2.881715*^6, 26847., 25951.714, 68751., 820., 669., 2149.574, 20.026, 
  19.358, 51.284, 0.612, 0.499, "", "", "", "", "", "", "", "", "", "", "", 
  "", "", "", "", "", "", "", "", "", "", "", "", "", "", "", "", "", 
  1.340598113*^9, "", "", "", "", "", "", "", "", "", "", "", "", "", ""}, 
 {"OWID_AFR", "", "Africa", "2021-01-06", 2.917507*^6, 35792., 26691., 
  69861., 1110., 727.429, 2176.273, 26.699, 19.91, 52.112, 0.828, 0.543, "", 
  "", "", "", "", "", "", "", "", "", "", "", "", "", "", "", "", "", "", "", 
  "", "", "", "", "", "", "", "", 1.340598113*^9, "", "", "", "", "", "", "", 
  "", "", "", "", "", "", ""}, {"OWID_AFR", "", "Africa", "2021-01-07", 
  2.952909*^6, 35402., 27492.857, 70550., 689., 726., 2202.68, 26.408, 
  20.508, 52.626, 0.514, 0.542, "", "", "", "", "", "", "", "", "", "", "", 
  "", "", "", "", "", "", "", "", "", "", "", "", "", "", "", "", "", 
  1.340598113*^9, "", "", "", "", "", "", "", "", "", "", "", "", "", ""}, 
 {"OWID_AFR", "", "Africa", "2021-01-08", 2.989382*^6, 36473., 28745., 
  71460., 910., 762., 2229.887, 27.207, 21.442, 53.305, 0.679, 0.568, "", "", 
  "", "", "", "", "", "", "", "", "", "", "", "", "", "", "", "", "", "", "", 
  "", "", "", "", "", "", "", 1.340598113*^9, "", "", "", "", "", "", "", "", 
  "", "", "", "", "", ""}, {"OWID_AFR", "", "Africa", "2021-01-09", 
  3.024481*^6, 35099., 30485., 72117., 657., 782.286, 2256.068, 26.182, 
  22.74, 53.795, 0.49, 0.584, "", "", "", "", "", "", "", "", "", "", "", "", 
  "", "", "", "", "", "", 0., 0., "", "", "", 0., 0., "", "", "", 
  1.340598113*^9, "", "", "", "", "", "", "", "", "", "", "", "", "", ""}, 
 {"OWID_AFR", "", "Africa", "2021-01-10", 3.056088*^6, 31607., 31858.857, 
  72711., 594., 780.714, 2279.645, 23.577, 23.765, 54.238, 0.443, 0.582, "", 
  "", "", "", "", "", "", "", "", "", "", "", "", "", "", "", "", "", "", "", 
  "", "", 500., "", "", "", 0., "", 1.340598113*^9, "", "", "", "", "", "", 
  "", "", "", "", "", "", "", ""}, {"OWID_AFR", "", "Africa", "2021-01-11", 
  3.084121*^6, 28033., 32750.429, 73392., 681., 780.143, 2300.556, 20.911, 
  24.43, 54.746, 0.508, 0.582, "", "", "", "", "", "", "", "", "", "", "", 
  "", "", "", "", "", "", "", "", "", "", "", 500., "", "", "", 0., "", 
  1.340598113*^9, "", "", "", "", "", "", "", "", "", "", "", "", "", ""}, 
 {"OWID_AFR", "", "Africa", "2021-01-12", 3.110249*^6, 26128., 32647.714, 
  74468., 1076., 816.714, 2320.046, 19.49, 24.353, 55.548, 0.803, 0.609, "", 
  "", "", "", "", "", "", "", "", "", "", "", "", "", "", "", "", "", "", "", 
  "", "", 500., "", "", "", 0., "", 1.340598113*^9, "", "", "", "", "", "", 
  "", "", "", "", "", "", "", ""}, {"OWID_AFR", "", "Africa", "2021-01-13", 
  3.144246*^6, 33997., 32391.286, 75688., 1220., 832.429, 2345.405, 25.36, 
  24.162, 56.458, 0.91, 0.621, "", "", "", "", "", "", "", "", "", "", "", 
  "", "", "", "", "", "", "", 2000., 2000., "", "", 500., 0., 0., "", 0., "", 
  1.340598113*^9, "", "", "", "", "", "", "", "", "", "", "", "", "", ""}, 
 {"OWID_AFR", "", "Africa", "2021-01-14", 3.178474*^6, 34228., 32223.571, 
  76741., 1053., 884.429, 2370.937, 25.532, 24.037, 57.244, 0.785, 0.66, "", 
  "", "", "", "", "", "", "", "", "", "", "", "", "", "", "", "", "", "", "", 
  "", "", 600., "", "", "", 0., "", 1.340598113*^9, "", "", "", "", "", "", 
  "", "", "", "", "", "", "", ""}, {"OWID_AFR", "", "Africa", "2021-01-15", 
  3.210049*^6, 31575., 31523.857, 77646., 905., 883.714, 2394.49, 23.553, 
  23.515, 57.919, 0.675, 0.659, "", "", "", "", "", "", "", "", "", "", "", 
  "", "", "", "", "", "", "", 4000., 4000., "", "", 667., 0., 0., "", 0., "", 
  1.340598113*^9, "", "", "", "", "", "", "", "", "", "", "", "", "", ""}, 
 {"OWID_AFR", "", "Africa", "2021-01-16", 3.237617*^6, 27568., 30448., 
  78309., 663., 884.571, 2415.054, 20.564, 22.712, 58.413, 0.495, 0.66, "", 
  "", "", "", "", "", "", "", "", "", "", "", "", "", "", "", "", "", 7000., 
  7000., "", 3000., 1000., 0., 0., "", 1., "", 1.340598113*^9, "", "", "", 
  "", "", "", "", "", "", "", "", "", "", ""}, 
 {"OWID_AFR", "", "Africa", "2021-01-17", 3.264186*^6, 26569., 29728.286, 
  78907., 598., 885.143, 2434.873, 19.819, 22.175, 58.86, 0.446, 0.66, "", 
  "", "", "", "", "", "", "", "", "", "", "", "", "", "", "", "", "", "", "", 
  "", "", 1118., "", "", "", 1., "", 1.340598113*^9, "", "", "", "", "", "", 
  "", "", "", "", "", "", "", ""}, {"OWID_AFR", "", "Africa", "2021-01-18", 
  3.286662*^6, 22476., 28934.429, 79632., 725., 891.429, 2451.639, 16.766, 
  21.583, 59.4, 0.541, 0.665, "", "", "", "", "", "", "", "", "", "", "", "", 
  "", "", "", "", "", "", "", "", "", "", 1236., "", "", "", 1., "", 
  1.340598113*^9, "", "", "", "", "", "", "", "", "", "", "", "", "", ""}, 
 {"OWID_AFR", "", "Africa", "2021-01-19", 3.310072*^6, 23410., 28546.143, 
  80834., 1202., 909.429, 2469.101, 17.462, 21.294, 60.297, 0.897, 0.678, "", 
  "", "", "", "", "", "", "", "", "", "", "", "", "", "", "", "", "", 10976., 
  10976., "", "", 1354., 0., 0., "", 1., "", 1.340598113*^9, "", "", "", "", 
  "", "", "", "", "", "", "", "", "", ""}, {"OWID_AFR", "", "Africa", 
  "2021-01-20", 3.338409*^6, 28337., 27737.571, 81756., 922., 866.857, 
  2490.238, 21.138, 20.69, 60.985, 0.688, 0.647, "", "", "", "", "", "", "", 
  "", "", "", "", "", "", "", "", "", "", "", 13163., 13163., "", 2187., 
  1595., 0., 0., "", 1., "", 1.340598113*^9, "", "", "", "", "", "", "", "", 
  "", "", "", "", "", ""}, {"OWID_AFR", "", "Africa", "2021-01-21", 
  3.366274*^6, 27865., 26828.571, 82781., 1025., 862.857, 2511.024, 20.785, 
  20.012, 61.749, 0.765, 0.644, "", "", "", "", "", "", "", "", "", "", "", 
  "", "", "", "", "", "", "", "", "", "", "", 1718., "", "", "", 1., "", 
  1.340598113*^9, "", "", "", "", "", "", "", "", "", "", "", "", "", ""}, 
 {"OWID_AFR", "", "Africa", "2021-01-22", 3.392453*^6, 26179., 26057.714, 
  83755., 974., 872.714, 2530.552, 19.528, 19.437, 62.476, 0.727, 0.651, "", 
  "", "", "", "", "", "", "", "", "", "", "", "", "", "", "", "", "", 16890., 
  16890., "", "", 1841., 0., 0., "", 1., "", 1.340598113*^9, "", "", "", "", 
  "", "", "", "", "", "", "", "", "", ""}, {"OWID_AFR", "", "Africa", 
  "2021-01-23", 3.419761*^6, 27308., 26020.571, 84537., 782., 889.714, 
  2550.922, 20.37, 19.41, 63.059, 0.583, 0.664, "", "", "", "", "", "", "", 
  "", "", "", "", "", "", "", "", "", "", "", 18353., 18353., "", 1463., 
  1622., 0., 0., "", 1., "", 1.340598113*^9, "", "", "", "", "", "", "", "", 
  "", "", "", "", "", ""}, {"OWID_AFR", "", "Africa", "2021-01-24", 
  3.439881*^6, 20120., 25099.286, 85184., 647., 896.714, 2565.93, 15.008, 
  18.722, 63.542, 0.483, 0.669, "", "", "", "", "", "", "", "", "", "", "", 
  "", "", "", "", "", "", "", 18353., 18353., "", 0., 1433., 0., 0., "", 1., 
  "", 1.340598113*^9, "", "", "", "", "", "", "", "", "", "", "", "", "", 
  ""}, {"OWID_AFR", "", "Africa", "2021-01-25", 3.456576*^6, 16695., 
  24273.429, 85955., 771., 903.286, 2578.383, 12.453, 18.106, 64.117, 0.575, 
  0.674, "", "", "", "", "", "", "", "", "", "", "", "", "", "", "", "", "", 
  "", 19889., 19889., "", 1536., 1463., 0., 0., "", 1., "", 1.340598113*^9, 
  "", "", "", "", "", "", "", "", "", "", "", "", "", ""}, 
 {"OWID_AFR", "", "Africa", "2021-01-26", 3.475174*^6, 18598., 23586., 
  86938., 983., 872., 2592.256, 13.873, 17.594, 64.85, 0.733, 0.65, "", "", 
  "", "", "", "", "", "", "", "", "", "", "", "", "", "", "", "", 22712., 
  22712., "", 2823., 1677., 0., 0., "", 1., "", 1.340598113*^9, "", "", "", 
  "", "", "", "", "", "", "", "", "", "", ""}, 
 {"OWID_AFR", "", "Africa", "2021-01-27", 3.496001*^6, 20827., 22513.143, 
  87989., 1051., 890.429, 2607.792, 15.536, 16.793, 65.634, 0.784, 0.664, "", 
  "", "", "", "", "", "", "", "", "", "", "", "", "", "", "", "", "", 25587., 
  25587., "", 2875., 1775., 0., 0., "", 1., "", 1.340598113*^9, "", "", "", 
  "", "", "", "", "", "", "", "", "", "", ""}, 
 {"OWID_AFR", "", "Africa", "2021-01-28", 3.516781*^6, 20780., 21501., 
  88985., 996., 886.286, 2623.293, 15.501, 16.038, 66.377, 0.743, 0.661, "", 
  "", "", "", "", "", "", "", "", "", "", "", "", "", "", "", "", "", 28779., 
  28779., "", 3192., 1965., 0., 0., "", 1., "", 1.340598113*^9, "", "", "", 
  "", "", "", "", "", "", "", "", "", "", ""}, 
 {"OWID_AFR", "", "Africa", "2021-01-29", 3.536003*^6, 19222., 20507.143, 
  89831., 846., 868., 2637.631, 14.338, 15.297, 67.008, 0.631, 0.647, "", "", 
  "", "", "", "", "", "", "", "", "", "", "", "", "", "", "", "", 30861., 
  30861., "", 2082., 1996., 0., 0., "", 1., "", 1.340598113*^9, "", "", "", 
  "", "", "", "", "", "", "", "", "", "", ""}, 
 {"OWID_AFR", "", "Africa", "2021-01-30", 3.553865*^6, 17862., 19157.714, 
  90446., 615., 844.143, 2650.955, 13.324, 14.29, 67.467, 0.459, 0.63, "", 
  "", "", "", "", "", "", "", "", "", "", "", "", "", "", "", "", "", 
  122206., 32206., "", 91345., 14836., 0.01, 0., "", 11., "", 1.340598113*^9, 
  "", "", "", "", "", "", "", "", "", "", "", "", "", ""}, 
 {"OWID_AFR", "", "Africa", "2021-01-31", 3.569617*^6, 15752., 18533.714, 
  90971., 525., 826.714, 2662.705, 11.75, 13.825, 67.859, 0.392, 0.617, "", 
  "", "", "", "", "", "", "", "", "", "", "", "", "", "", "", "", "", 
  158206., 32206., "", 36000., 19979., 0.01, 0., "", 15., "", 1.340598113*^9, 
  "", "", "", "", "", "", "", "", "", "", "", "", "", ""}, 
 {"OWID_AFR", "", "Africa", "2021-02-01", 3.582328*^6, 12711., 17964.571, 
  91480., 509., 789.286, 2672.186, 9.482, 13.4, 68.238, 0.38, 0.589, "", "", 
  "", "", "", "", "", "", "", "", "", "", "", "", "", "", "", "", 236712., 
  36631., "", 78506., 30975., 0.02, 0., "", 23., "", 1.340598113*^9, "", "", 
  "", "", "", "", "", "", "", "", "", "", "", ""}, 
 {"OWID_AFR", "", "Africa", "2021-02-02", 3.597149*^6, 14821., 17425., 
  92364., 884., 775.143, 2683.242, 11.056, 12.998, 68.898, 0.659, 0.578, "", 
  "", "", "", "", "", "", "", "", "", "", "", "", "", "", "", "", "", 
  295127., 37836., "", 58415., 38916., 0.02, 0., "", 29., "", 1.340598113*^9, 
  "", "", "", "", "", "", "", "", "", "", "", "", "", ""}, 
 {"OWID_AFR", "", "Africa", "2021-02-03", 3.612611*^6, 15462., 16658.571, 
  93073., 709., 726.286, 2694.776, 11.534, 12.426, 69.426, 0.529, 0.542, "", 
  "", "", "", "", "", "", "", "", "", "", "", "", "", "", "", "", "", 
  347149., 38746., 5., 52022., 45937., 0.03, 0., 0., 34., "", 1.340598113*^9, 
  "", "", "", "", "", "", "", "", "", "", "", "", "", ""}, 
 {"OWID_AFR", "", "Africa", "2021-02-04", 3.629085*^6, 16474., 16043.429, 
  93640., 567., 665., 2707.064, 12.289, 11.967, 69.849, 0.423, 0.496, "", "", 
  "", "", "", "", "", "", "", "", "", "", "", "", "", "", "", "", 390474., 
  38746., 5., 43325., 51671., 0.03, 0., 0., 39., "", 1.340598113*^9, "", "", 
  "", "", "", "", "", "", "", "", "", "", "", ""}, 
 {"OWID_AFR", "", "Africa", "2021-02-05", 3.644992*^6, 15907., 15569.857, 
  94187., 547., 622.286, 2718.93, 11.866, 11.614, 70.257, 0.408, 0.464, "", 
  "", "", "", "", "", "", "", "", "", "", "", "", "", "", "", "", "", 
  446986., 38746., 5., 56512., 59446., 0.03, 0., 0., 44., "", 1.340598113*^9, 
  "", "", "", "", "", "", "", "", "", "", "", "", "", ""}, 
 {"OWID_AFR", "", "Africa", "2021-02-06", 3.658537*^6, 13545., 14953.143, 
  94735., 548., 612.714, 2729.033, 10.104, 11.154, 70.666, 0.409, 0.457, "", 
  "", "", "", "", "", "", "", "", "", "", "", "", "", "", "", "", "", 
  504800., 39248., 1586., 57814., 54656., 0.04, 0., 0., 41., "", 
  1.340598113*^9, "", "", "", "", "", "", "", "", "", "", "", "", "", ""}, 
 {"OWID_AFR", "", "Africa", "2021-02-07", 3.670261*^6, 11724., 14377.714, 
  95092., 357., 588.714, 2737.779, 8.745, 10.725, 70.933, 0.266, 0.439, "", 
  "", "", "", "", "", "", "", "", "", "", "", "", "", "", "", "", "", "", "", 
  "", "", 55849., "", "", "", 42., "", 1.340598113*^9, "", "", "", "", "", 
  "", "", "", "", "", "", "", "", ""}, {"OWID_AFR", "", "Africa", 
  "2021-02-08", 3.681674*^6, 11413., 14192.286, 95535., 443., 579.286, 
  2746.292, 8.513, 10.587, 71.263, 0.33, 0.432, "", "", "", "", "", "", "", 
  "", "", "", "", "", "", "", "", "", "", "", 593502., 39373., 3980., "", 
  50970., 0.04, 0., 0., 38., "", 1.340598113*^9, "", "", "", "", "", "", "", 
  "", "", "", "", "", "", ""}, {"OWID_AFR", "", "Africa", "2021-02-09", 
  3.693025*^6, 11351., 13696.571, 96234., 699., 552.857, 2754.759, 8.467, 
  10.217, 71.784, 0.521, 0.412, "", "", "", "", "", "", "", "", "", "", "", 
  "", "", "", "", "", "", "", 661263., 39382., 6700., 67761., 52305., 0.05, 
  0., 0., 39., "", 1.340598113*^9, "", "", "", "", "", "", "", "", "", "", 
  "", "", "", ""}, {"OWID_AFR", "", "Africa", "2021-02-10", 3.706143*^6, 
  13118., 13361.714, 96770., 536., 528.143, 2764.544, 9.785, 9.967, 72.184, 
  0.4, 0.394, "", "", "", "", "", "", "", "", "", "", "", "", "", "", "", "", 
  "", "", 795836., 39385., 10335., 134573., 64098., 0.06, 0., 0., 48., "", 
  1.340598113*^9, "", "", "", "", "", "", "", "", "", "", "", "", "", ""}, 
 {"OWID_AFR", "", "Africa", "2021-02-11", 3.718013*^6, 11870., 12704., 
  97265., 495., 517.857, 2773.399, 8.854, 9.476, 72.553, 0.369, 0.386, "", 
  "", "", "", "", "", "", "", "", "", "", "", "", "", "", "", "", "", 
  908796., 39611., 13867., 112960., 74046., 0.07, 0., 0., 55., "", 
  1.340598113*^9, "", "", "", "", "", "", "", "", "", "", "", "", "", ""}, 
 {"OWID_AFR", "", "Africa", "2021-02-12", 3.731935*^6, 13922., 12420.429, 
  97830., 565., 520.429, 2783.784, 10.385, 9.265, 72.975, 0.421, 0.388, "", 
  "", "", "", "", "", "", "", "", "", "", "", "", "", "", "", "", "", 
  1.165581*^6, 39611., 13867., 256785., 102656., 0.09, 0., 0., 77., "", 
  1.340598113*^9, "", "", "", "", "", "", "", "", "", "", "", "", "", ""}, 
 {"OWID_AFR", "", "Africa", "2021-02-13", 3.742849*^6, 10914., 12044.571, 
  98182., 352., 492.429, 2791.925, 8.141, 8.984, 73.237, 0.263, 0.367, "", 
  "", "", "", "", "", "", "", "", "", "", "", "", "", "", "", "", "", 
  1.446178*^6, 43458., 14181., 280597., 134483., 0.11, 0., 0., 100., "", 
  1.340598113*^9, "", "", "", "", "", "", "", "", "", "", "", "", "", ""}, 
 {"OWID_AFR", "", "Africa", "2021-02-14", 3.753174*^6, 10325., 11844.714, 
  98475., 293., 483.286, 2799.626, 7.702, 8.835, 73.456, 0.219, 0.361, "", 
  "", "", "", "", "", "", "", "", "", "", "", "", "", "", "", "", "", "", "", 
  "", "", 151062., "", "", "", 113., "", 1.340598113*^9, "", "", "", "", "", 
  "", "", "", "", "", "", "", "", ""}, {"OWID_AFR", "", "Africa", 
  "2021-02-15", 3.763067*^6, 9893., 11627.571, 98946., 471., 487.286, 
  2807.006, 7.38, 8.673, 73.807, 0.351, 0.363, "", "", "", "", "", "", "", 
  "", "", "", "", "", "", "", "", "", "", "", 1.766999*^6, 43467., 16441., 
  "", 167642., 0.13, 0., 0., 125., "", 1.340598113*^9, "", "", "", "", "", 
  "", "", "", "", "", "", "", "", ""}, {"OWID_AFR", "", "Africa", 
  "2021-02-16", 3.773094*^6, 10027., 11438.429, 99412., 466., 454., 2814.486, 
  7.479, 8.532, 74.155, 0.348, 0.339, "", "", "", "", "", "", "", "", "", "", 
  "", "", "", "", "", "", "", "", 1.965819*^6, 43474., 18176., 198820., 
  186365., 0.15, 0., 0., 139., "", 1.340598113*^9, "", "", "", "", "", "", 
  "", "", "", "", "", "", "", ""}, {"OWID_AFR", "", "Africa", "2021-02-17", 
  3.785411*^6, 12317., 11324., 99814., 402., 434.857, 2823.673, 9.188, 8.447, 
  74.455, 0.3, 0.324, "", "", "", "", "", "", "", "", "", "", "", "", "", "", 
  "", "", "", "", 2.147659*^6, 47134., 19512., 181840., 193118., 0.16, 0., 
  0., 144., "", 1.340598113*^9, "", "", "", "", "", "", "", "", "", "", "", 
  "", "", ""}, {"OWID_AFR", "", "Africa", "2021-02-18", 3.799304*^6, 13893., 
  11613., 100325., 511., 437.143, 2834.037, 10.363, 8.663, 74.836, 0.381, 
  0.326, "", "", "", "", "", "", "", "", "", "", "", "", "", "", "", "", "", 
  "", 2.303964*^6, 50176., 22925., 156305., 199310., 0.17, 0., 0., 149., "", 
  1.340598113*^9, "", "", "", "", "", "", "", "", "", "", "", "", "", ""}, 
 {"OWID_AFR", "", "Africa", "2021-02-19", 3.810323*^6, 11019., 11198.286, 
  100709., 384., 411.286, 2842.256, 8.219, 8.353, 75.122, 0.286, 0.307, "", 
  "", "", "", "", "", "", "", "", "", "", "", "", "", "", "", "", "", 
  2.513999*^6, 2.487533*^6, 32990., 210035., 192631., 0.19, 0.19, 0., 144., 
  "", 1.340598113*^9, "", "", "", "", "", "", "", "", "", "", "", "", "", 
  ""}, {"OWID_AFR", "", "Africa", "2021-02-20", 3.819882*^6, 9559., 
  11004.714, 100999., 290., 402.429, 2849.386, 7.13, 8.209, 75.339, 0.216, 
  0.3, "", "", "", "", "", "", "", "", "", "", "", "", "", "", "", "", "", 
  "", 2.616931*^6, 2.581856*^6, 45489., 102932., 167250., 0.2, 0.19, 0., 
  125., "", 1.340598113*^9, "", "", "", "", "", "", "", "", "", "", "", "", 
  "", ""}, {"OWID_AFR", "", "Africa", "2021-02-21", 3.829402*^6, 9520., 
  10889.714, 101336., 337., 408.714, 2856.488, 7.101, 8.123, 75.59, 0.251, 
  0.305, "", "", "", "", "", "", "", "", "", "", "", "", "", "", "", "", "", 
  "", 2.622421*^6, 2.587346*^6, 50463., 5490., 145119., 0.2, 0.19, 0., 108., 
  "", 1.340598113*^9, "", "", "", "", "", "", "", "", "", "", "", "", "", 
  ""}, {"OWID_AFR", "", "Africa", "2021-02-22", 3.838419*^6, 9017., 
  10764.571, 101672., 336., 389.429, 2863.214, 6.726, 8.03, 75.841, 0.251, 
  0.29, "", "", "", "", "", "", "", "", "", "", "", "", "", "", "", "", "", 
  "", 2.745898*^6, 2.700632*^6, 68325., 123477., 139843., 0.2, 0.2, 0.01, 
  104., "", 1.340598113*^9, "", "", "", "", "", "", "", "", "", "", "", "", 
  "", ""}, {"OWID_AFR", "", "Africa", "2021-02-23", 3.846159*^6, 7740., 
  10437.857, 102142., 470., 390., 2868.987, 5.774, 7.786, 76.191, 0.351, 
  0.291, "", "", "", "", "", "", "", "", "", "", "", "", "", "", "", "", "", 
  "", 2.854362*^6, 2.79975*^6, 86927., 108464., 126935., 0.21, 0.21, 0.01, 
  95., "", 1.340598113*^9, "", "", "", "", "", "", "", "", "", "", "", "", 
  "", ""}, {"OWID_AFR", "", "Africa", "2021-02-24", 3.856688*^6, 10529., 
  10182.429, 102468., 326., 379.143, 2876.841, 7.854, 7.595, 76.435, 0.243, 
  0.283, "", "", "", "", "", "", "", "", "", "", "", "", "", "", "", "", "", 
  "", 3.153546*^6, 3.092856*^6, 102499., 299184., 143698., 0.24, 0.23, 0.01, 
  107., "", 1.340598113*^9, "", "", "", "", "", "", "", "", "", "", "", "", 
  "", ""}, {"OWID_AFR", "", "Africa", "2021-02-25", 3.868959*^6, 12271., 
  9950.714, 102825., 357., 357.143, 2885.995, 9.153, 7.423, 76.701, 0.266, 
  0.266, "", "", "", "", "", "", "", "", "", "", "", "", "", "", "", "", "", 
  "", 3.434869*^6, 3.367724*^6, 119792., 281323., 161558., 0.26, 0.25, 0.01, 
  121., "", 1.340598113*^9, "", "", "", "", "", "", "", "", "", "", "", "", 
  "", ""}, {"OWID_AFR", "", "Africa", "2021-02-26", 3.880062*^6, 11103., 
  9962.714, 103142., 317., 347.571, 2894.277, 8.282, 7.432, 76.937, 0.236, 
  0.259, "", "", "", "", "", "", "", "", "", "", "", "", "", "", "", "", "", 
  "", 3.677524*^6, 3.557568*^6, 183604., 242655., 166218., 0.27, 0.27, 0.01, 
  124., "", 1.340598113*^9, "", "", "", "", "", "", "", "", "", "", "", "", 
  "", ""}, {"OWID_AFR", "", "Africa", "2021-02-27", 3.887893*^6, 7831., 
  9715.857, 103481., 339., 354.571, 2900.118, 5.841, 7.247, 77.19, 0.253, 
  0.264, "", "", "", "", "", "", "", "", "", "", "", "", "", "", "", "", "", 
  "", 3.866267*^6, 3.680812*^6, 252758., 188743., 178477., 0.29, 0.27, 0.02, 
  133., "", 1.340598113*^9, "", "", "", "", "", "", "", "", "", "", "", "", 
  "", ""}, {"OWID_AFR", "", "Africa", "2021-02-28", 3.897307*^6, 9414., 
  9700.714, 103706., 225., 338.571, 2907.14, 7.022, 7.236, 77.358, 0.168, 
  0.253, "", "", "", "", "", "", "", "", "", "", "", "", "", "", "", "", "", 
  "", 3.873994*^6, 3.688539*^6, 255982., 7727., 178796., 0.29, 0.28, 0.02, 
  133., "", 1.340598113*^9, "", "", "", "", "", "", "", "", "", "", "", "", 
  "", ""}, {"OWID_AFR", "", "Africa", "2021-03-01", 3.90614*^6, 8833., 
  9674.429, 104021., 315., 335.571, 2913.729, 6.589, 7.217, 77.593, 0.235, 
  0.25, "", "", "", "", "", "", "", "", "", "", "", "", "", "", "", "", "", 
  "", 4.091848*^6, 3.834638*^6, 330257., 217854., 192279., 0.31, 0.29, 0.02, 
  143., "", 1.340598113*^9, "", "", "", "", "", "", "", "", "", "", "", "", 
  "", ""}, {"OWID_AFR", "", "Africa", "2021-03-02", 3.913848*^6, 7708., 
  9669.857, 104384., 363., 320.286, 2919.479, 5.75, 7.213, 77.864, 0.271, 
  0.239, "", "", "", "", "", "", "", "", "", "", "", "", "", "", "", "", "", 
  "", 4.252773*^6, 3.934686*^6, 394124., 160925., 199773., 0.32, 0.29, 0.03, 
  149., "", 1.340598113*^9, "", "", "", "", "", "", "", "", "", "", "", "", 
  "", ""}, {"OWID_AFR", "", "Africa", "2021-03-03", 3.924756*^6, 10908., 
  9724., 104662., 278., 313.429, 2927.616, 8.137, 7.253, 78.071, 0.207, 
  0.234, "", "", "", "", "", "", "", "", "", "", "", "", "", "", "", "", "", 
  "", 4.424168*^6, 4.038877*^6, 468861., 171395., 181517., 0.33, 0.3, 0.03, 
  135., "", 1.340598113*^9, "", "", "", "", "", "", "", "", "", "", "", "", 
  "", ""}, {"OWID_AFR", "", "Africa", "2021-03-04", 3.937138*^6, 12382., 
  9739.857, 104993., 331., 309.714, 2936.852, 9.236, 7.265, 78.318, 0.247, 
  0.231, "", "", "", "", "", "", "", "", "", "", "", "", "", "", "", "", "", 
  "", 4.570159*^6, 4.132507*^6, 529681., 145991., 162184., 0.34, 0.31, 0.04, 
  121., "", 1.340598113*^9, "", "", "", "", "", "", "", "", "", "", "", "", 
  "", ""}, {"OWID_AFR", "", "Africa", "2021-03-05", 3.945707*^6, 8569., 
  9377.857, 105220., 227., 296.857, 2943.244, 6.392, 6.995, 78.487, 0.169, 
  0.221, "", "", "", "", "", "", "", "", "", "", "", "", "", "", "", "", "", 
  "", 4.80823*^6, 4.283668*^6, 624742., 238071., 161529., 0.36, 0.32, 0.05, 
  120., "", 1.340598113*^9, "", "", "", "", "", "", "", "", "", "", "", "", 
  "", ""}, {"OWID_AFR", "", "Africa", "2021-03-06", 3.95566*^6, 9953., 9681., 
  105483., 263., 286., 2950.668, 7.424, 7.221, 78.684, 0.196, 0.213, "", "", 
  "", "", "", "", "", "", "", "", "", "", "", "", "", "", "", "", 
  5.013197*^6, 4.409635*^6, 705135., 204967., 163847., 0.37, 0.33, 0.05, 
  122., "", 1.340598113*^9, "", "", "", "", "", "", "", "", "", "", "", "", 
  "", ""}, {"OWID_AFR", "", "Africa", "2021-03-07", 3.964055*^6, 8395., 
  9535.429, 105713., 230., 286.714, 2956.93, 6.262, 7.113, 78.855, 0.172, 
  0.214, "", "", "", "", "", "", "", "", "", "", "", "", "", "", "", "", "", 
  "", 5.053898*^6, 4.450336*^6, 705135., 40701., 168558., 0.38, 0.33, 0.05, 
  126., "", 1.340598113*^9, "", "", "", "", "", "", "", "", "", "", "", "", 
  "", ""}, {"OWID_AFR", "", "Africa", "2021-03-08", 3.973332*^6, 9277., 
  9598.857, 106092., 379., 295.857, 2963.85, 6.92, 7.16, 79.138, 0.283, 
  0.221, "", "", "", "", "", "", "", "", "", "", "", "", "", "", "", "", "", 
  "", 5.402174*^6, 4.724256*^6, 779759., 348276., 187189., 0.4, 0.35, 0.06, 
  140., "", 1.340598113*^9, "", "", "", "", "", "", "", "", "", "", "", "", 
  "", ""}, {"OWID_AFR", "", "Africa", "2021-03-09", 3.981161*^6, 7829., 
  9616.143, 106381., 289., 285.286, 2969.69, 5.84, 7.173, 79.353, 0.216, 
  0.213, "", "", "", "", "", "", "", "", "", "", "", "", "", "", "", "", "", 
  "", 5.542597*^6, 4.798917*^6, 850734., 140423., 184261., 0.41, 0.36, 0.06, 
  137., "", 1.340598113*^9, "", "", "", "", "", "", "", "", "", "", "", "", 
  "", ""}, {"OWID_AFR", "", "Africa", "2021-03-10", 3.991582*^6, 10421., 
  9546.571, 106682., 301., 288.571, 2977.464, 7.773, 7.121, 79.578, 0.225, 
  0.215, "", "", "", "", "", "", "", "", "", "", "", "", "", "", "", "", "", 
  "", 5.882799*^6, 5.001631*^6, 1.010055*^6, 340202., 208376., 0.44, 0.37, 
  0.08, 155., "", 1.340598113*^9, "", "", "", "", "", "", "", "", "", "", "", 
  "", "", ""}, {"OWID_AFR", "", "Africa", "2021-03-11", 4.006913*^6, 15331., 
  9967.857, 107006., 324., 287.571, 2988.899, 11.436, 7.435, 79.82, 0.242, 
  0.215, "", "", "", "", "", "", "", "", "", "", "", "", "", "", "", "", "", 
  "", 6.071207*^6, 5.072092*^6, 1.137129*^6, 188408., 214435., 0.45, 0.38, 
  0.08, 160., "", 1.340598113*^9, "", "", "", "", "", "", "", "", "", "", "", 
  "", "", ""}, {"OWID_AFR", "", "Africa", "2021-03-12", 4.016737*^6, 9824., 
  10147.143, 107233., 227., 287.571, 2996.228, 7.328, 7.569, 79.989, 0.169, 
  0.215, "", "", "", "", "", "", "", "", "", "", "", "", "", "", "", "", "", 
  "", 6.381226*^6, 5.129231*^6, 1.39721*^6, 310019., 224714., 0.48, 0.38, 
  0.1, 168., "", 1.340598113*^9, "", "", "", "", "", "", "", "", "", "", "", 
  "", "", ""}, {"OWID_AFR", "", "Africa", "2021-03-13", 4.027046*^6, 10309., 
  10198., 107527., 294., 292., 3003.917, 7.69, 7.607, 80.208, 0.219, 0.218, 
  "", "", "", "", "", "", "", "", "", "", "", "", "", "", "", "", "", "", 
  6.784874*^6, 5.2861*^6, 1.644318*^6, 403648., 253097., 0.51, 0.39, 0.12, 
  189., "", 1.340598113*^9, "", "", "", "", "", "", "", "", "", "", "", "", 
  "", ""}, {"OWID_AFR", "", "Africa", "2021-03-14", 4.035708*^6, 8662., 
  10236.143, 107778., 251., 295., 3010.379, 6.461, 7.636, 80.395, 0.187, 
  0.22, "", "", "", "", "", "", "", "", "", "", "", "", "", "", "", "", "", 
  "", 6.801397*^6, 5.302623*^6, 1.644318*^6, 16523., 249643., 0.51, 0.4, 
  0.12, 186., "", 1.340598113*^9, "", "", "", "", "", "", "", "", "", "", "", 
  "", "", ""}, {"OWID_AFR", "", "Africa", "2021-03-15", 4.04412*^6, 8412., 
  10112.571, 108087., 309., 285., 3016.654, 6.275, 7.543, 80.626, 0.23, 
  0.213, "", "", "", "", "", "", "", "", "", "", "", "", "", "", "", "", "", 
  "", 7.194432*^6, 5.399518*^6, 1.942667*^6, 393035., 256037., 0.54, 0.4, 
  0.14, 191., "", 1.340598113*^9, "", "", "", "", "", "", "", "", "", "", "", 
  "", "", ""}, {"OWID_AFR", "", "Africa", "2021-03-16", 4.053103*^6, 8983., 
  10277.429, 108394., 307., 287.571, 3023.354, 6.701, 7.666, 80.855, 0.229, 
  0.215, "", "", "", "", "", "", "", "", "", "", "", "", "", "", "", "", "", 
  "", 7.429911*^6, 5.440673*^6, 2.146524*^6, 235479., 269616., 0.55, 0.41, 
  0.16, 201., "", 1.340598113*^9, "", "", "", "", "", "", "", "", "", "", "", 
  "", "", ""}, {"OWID_AFR", "", "Africa", "2021-03-17", 4.064224*^6, 11121., 
  10377.429, 108671., 277., 284.143, 3031.65, 8.296, 7.741, 81.062, 0.207, 
  0.212, "", "", "", "", "", "", "", "", "", "", "", "", "", "", "", "", "", 
  "", 7.63161*^6, 5.487287*^6, 2.312736*^6, 201699., 249830., 0.57, 0.41, 
  0.17, 186., "", 1.340598113*^9, "", "", "", "", "", "", "", "", "", "", "", 
  "", "", ""}, {"OWID_AFR", "", "Africa", "2021-03-18", 4.075556*^6, 11332., 
  9806.143, 108932., 261., 275.143, 3040.103, 8.453, 7.315, 81.256, 0.195, 
  0.205, "", "", "", "", "", "", "", "", "", "", "", "", "", "", "", "", "", 
  "", 7.81905*^6, 5.674476*^6, 2.321849*^6, 187440., 249692., 0.58, 0.42, 
  0.17, 186., "", 1.340598113*^9, "", "", "", "", "", "", "", "", "", "", "", 
  "", "", ""}, {"OWID_AFR", "", "Africa", "2021-03-19", 4.088217*^6, 12661., 
  10211.429, 109477., 545., 320.571, 3049.547, 9.444, 7.617, 81.663, 0.407, 
  0.239, "", "", "", "", "", "", "", "", "", "", "", "", "", "", "", "", "", 
  "", 8.101883*^6, 5.746305*^6, 2.563824*^6, 282833., 245808., 0.6, 0.43, 
  0.19, 183., "", 1.340598113*^9, "", "", "", "", "", "", "", "", "", "", "", 
  "", "", ""}, {"OWID_AFR", "", "Africa", "2021-03-20", 4.097421*^6, 9204., 
  10053.571, 109674., 197., 306.714, 3056.413, 6.866, 7.499, 81.81, 0.147, 
  0.229, "", "", "", "", "", "", "", "", "", "", "", "", "", "", "", "", "", 
  "", 8.194242*^6, 5.767632*^6, 2.634856*^6, 92359., 201338., 0.61, 0.43, 
  0.2, 150., "", 1.340598113*^9, "", "", "", "", "", "", "", "", "", "", "", 
  "", "", ""}, {"OWID_AFR", "", "Africa", "2021-03-21", 4.106515*^6, 9094., 
  10115.286, 109903., 229., 303.571, 3063.196, 6.784, 7.545, 81.981, 0.171, 
  0.226, "", "", "", "", "", "", "", "", "", "", "", "", "", "", "", "", "", 
  "", 8.21579*^6, 5.78918*^6, 2.634856*^6, 21548., 202056., 0.61, 0.43, 0.2, 
  151., "", 1.340598113*^9, "", "", "", "", "", "", "", "", "", "", "", "", 
  "", ""}, {"OWID_AFR", "", "Africa", "2021-03-22", 4.116102*^6, 9587., 
  10283.143, 110163., 260., 296.571, 3070.347, 7.151, 7.671, 82.175, 0.194, 
  0.221, "", "", "", "", "", "", "", "", "", "", "", "", "", "", "", "", "", 
  "", 8.338031*^6, 5.817779*^6, 2.728498*^6, 122241., 163371., 0.62, 0.43, 
  0.2, 122., "", 1.340598113*^9, "", "", "", "", "", "", "", "", "", "", "", 
  "", "", ""}, {"OWID_AFR", "", "Africa", "2021-03-23", 4.124688*^6, 8586., 
  10226.429, 110485., 322., 298.714, 3076.752, 6.405, 7.628, 82.415, 0.24, 
  0.223, "", "", "", "", "", "", "", "", "", "", "", "", "", "", "", "", "", 
  "", 8.484254*^6, 5.891994*^6, 2.820695*^6, 146223., 150620., 0.63, 0.44, 
  0.21, 112., "", 1.340598113*^9, "", "", "", "", "", "", "", "", "", "", "", 
  "", "", ""}, {"OWID_AFR", "", "Africa", "2021-03-24", 4.135583*^6, 10895., 
  10194.143, 110807., 322., 305.143, 3084.879, 8.127, 7.604, 82.655, 0.24, 
  0.228, "", "", "", "", "", "", "", "", "", "", "", "", "", "", "", "", "", 
  "", 9.420365*^6, 6.572947*^6, 3.089404*^6, 936111., 255536., 0.7, 0.49, 
  0.23, 191., "", 1.340598113*^9, "", "", "", "", "", "", "", "", "", "", "", 
  "", "", ""}, {"OWID_AFR", "", "Africa", "2021-03-25", 4.148073*^6, 12490., 
  10359.571, 111193., 386., 323., 3094.196, 9.317, 7.728, 82.943, 0.288, 
  0.241, "", "", "", "", "", "", "", "", "", "", "", "", "", "", "", "", "", 
  "", 9.708756*^6, 6.633421*^6, 3.329642*^6, 288391., 269958., 0.72, 0.49, 
  0.25, 201., "", 1.340598113*^9, "", "", "", "", "", "", "", "", "", "", "", 
  "", "", ""}, {"OWID_AFR", "", "Africa", "2021-03-26", 4.166617*^6, 18544., 
  11200., 111537., 344., 294.286, 3108.028, 13.833, 8.354, 83.199, 0.257, 
  0.22, "", "", "", "", "", "", "", "", "", "", "", "", "", "", "", "", "", 
  "", 9.977284*^6, 6.73885*^6, 3.503614*^6, 268528., 267914., 0.74, 0.5, 
  0.26, 200., "", 1.340598113*^9, "", "", "", "", "", "", "", "", "", "", "", 
  "", "", ""}, {"OWID_AFR", "", "Africa", "2021-03-27", 4.176092*^6, 9475., 
  11238.714, 111730., 193., 293.714, 3115.096, 7.068, 8.383, 83.343, 0.144, 
  0.219, "", "", "", "", "", "", "", "", "", "", "", "", "", "", "", "", "", 
  "", 1.0303121*^7, 6.962741*^6, 3.606163*^6, 325837., 301268., 0.77, 0.52, 
  0.27, 225., "", 1.340598113*^9, "", "", "", "", "", "", "", "", "", "", "", 
  "", "", ""}, {"OWID_AFR", "", "Africa", "2021-03-28", 4.185092*^6, 9000., 
  11225.286, 111913., 183., 287.143, 3121.81, 6.713, 8.373, 83.48, 0.137, 
  0.214, "", "", "", "", "", "", "", "", "", "", "", "", "", "", "", "", "", 
  "", 1.056197*^7, 7.218927*^6, 3.608826*^6, 258849., 335169., 0.79, 0.54, 
  0.27, 250., "", 1.340598113*^9, "", "", "", "", "", "", "", "", "", "", "", 
  "", "", ""}, {"OWID_AFR", "", "Africa", "2021-03-29", 4.194799*^6, 9707., 
  11242.429, 112225., 312., 294.571, 3129.05, 7.241, 8.386, 83.713, 0.233, 
  0.22, "", "", "", "", "", "", "", "", "", "", "", "", "", "", "", "", "", 
  "", 1.0774885*^7, 7.305693*^6, 3.743035*^6, 212915., 348122., 0.8, 0.54, 
  0.28, 260., "", 1.340598113*^9, "", "", "", "", "", "", "", "", "", "", "", 
  "", "", ""}, {"OWID_AFR", "", "Africa", "2021-03-30", 4.204561*^6, 9762., 
  11410.429, 112502., 277., 288.143, 3136.332, 7.282, 8.511, 83.919, 0.207, 
  0.215, "", "", "", "", "", "", "", "", "", "", "", "", "", "", "", "", "", 
  "", 1.097167*^7, 7.387045*^6, 3.87051*^6, 196785., 355345., 0.82, 0.55, 
  0.29, 265., "", 1.340598113*^9, "", "", "", "", "", "", "", "", "", "", "", 
  "", "", ""}, {"OWID_AFR", "", "Africa", "2021-03-31", 4.217313*^6, 12752., 
  11675.714, 112759., 257., 278.857, 3145.844, 9.512, 8.709, 84.111, 0.192, 
  0.208, "", "", "", "", "", "", "", "", "", "", "", "", "", "", "", "", "", 
  "", 1.1475702*^7, 7.744531*^6, 3.995049*^6, 504032., 293620., 0.86, 0.58, 
  0.3, 219., "", 1.340598113*^9, "", "", "", "", "", "", "", "", "", "", "", 
  "", "", ""}, {"OWID_AFR", "", "Africa", "2021-04-01", 4.239457*^6, 22144., 
  13054.857, 113166., 407., 281.857, 3162.362, 16.518, 9.738, 84.415, 0.304, 
  0.21, "", "", "", "", "", "", "", "", "", "", "", "", "", "", "", "", "", 
  "", 1.1729279*^7, 7.900844*^6, 4.097537*^6, 253577., 288646., 0.87, 0.59, 
  0.31, 215., "", 1.340598113*^9, "", "", "", "", "", "", "", "", "", "", "", 
  "", "", ""}, {"OWID_AFR", "", "Africa", "2021-04-02", 4.252635*^6, 13178., 
  12288.286, 113413., 247., 268., 3172.192, 9.83, 9.166, 84.599, 0.184, 0.2, 
  "", "", "", "", "", "", "", "", "", "", "", "", "", "", "", "", "", "", 
  1.1883043*^7, 7.977827*^6, 4.174318*^6, 153764., 272251., 0.89, 0.6, 0.31, 
  203., "", 1.340598113*^9, "", "", "", "", "", "", "", "", "", "", "", "", 
  "", ""}, {"OWID_AFR", "", "Africa", "2021-04-03", 4.261416*^6, 8781., 
  12189.143, 113581., 168., 264.429, 3178.742, 6.55, 9.092, 84.724, 0.125, 
  0.197, "", "", "", "", "", "", "", "", "", "", "", "", "", "", "", "", "", 
  "", 1.2018282*^7, 8.061371*^6, 4.226013*^6, 135239., 245023., 0.9, 0.6, 
  0.32, 183., "", 1.340598113*^9, "", "", "", "", "", "", "", "", "", "", "", 
  "", "", ""}, {"OWID_AFR", "", "Africa", "2021-04-04", 4.270919*^6, 9503., 
  12261., 113853., 272., 277.143, 3185.831, 7.089, 9.146, 84.927, 0.203, 
  0.207, "", "", "", "", "", "", "", "", "", "", "", "", "", "", "", "", "", 
  "", 1.2082234*^7, 8.131493*^6, 4.226289*^6, 63952., 217181., 0.9, 0.61, 
  0.32, 162., "", 1.340598113*^9, "", "", "", "", "", "", "", "", "", "", "", 
  "", "", ""}, {"OWID_AFR", "", "Africa", "2021-04-05", 4.280173*^6, 9254., 
  12196.286, 114083., 230., 265.429, 3192.734, 6.903, 9.098, 85.099, 0.172, 
  0.198, "", "", "", "", "", "", "", "", "", "", "", "", "", "", "", "", "", 
  "", 1.2235736*^7, 8.226641*^6, 4.28589*^6, 153502., 208693., 0.91, 0.61, 
  0.32, 156., "", 1.340598113*^9, "", "", "", "", "", "", "", "", "", "", "", 
  "", "", ""}, {"OWID_AFR", "", "Africa", "2021-04-06", 4.289749*^6, 9576., 
  12169.714, 114319., 236., 259.571, 3199.877, 7.143, 9.078, 85.275, 0.176, 
  0.194, "", "", "", "", "", "", "", "", "", "", "", "", "", "", "", "", "", 
  "", 1.2575036*^7, 8.52187*^6, 4.333474*^6, 339300., 229052., 0.94, 0.64, 
  0.32, 171., "", 1.340598113*^9, "", "", "", "", "", "", "", "", "", "", "", 
  "", "", ""}, {"OWID_AFR", "", "Africa", "2021-04-07", 4.301423*^6, 11674., 
  12015.714, 114586., 267., 261., 3208.585, 8.708, 8.963, 85.474, 0.199, 
  0.195, "", "", "", "", "", "", "", "", "", "", "", "", "", "", "", "", "", 
  "", 1.2960258*^7, 8.839889*^6, 4.399278*^6, 385222., 212079., 0.97, 0.66, 
  0.33, 158., "", 1.340598113*^9, "", "", "", "", "", "", "", "", "", "", "", 
  "", "", ""}, {"OWID_AFR", "", "Africa", "2021-04-08", 4.318252*^6, 16829., 
  11256.429, 114937., 351., 253., 3221.138, 12.553, 8.397, 85.736, 0.262, 
  0.189, "", "", "", "", "", "", "", "", "", "", "", "", "", "", "", "", "", 
  "", 1.3697727*^7, 9.540508*^6, 4.443032*^6, 737469., 281207., 1.02, 0.71, 
  0.33, 210., "", 1.340598113*^9, "", "", "", "", "", "", "", "", "", "", "", 
  "", "", ""}, {"OWID_AFR", "", "Africa", "2021-04-09", 4.330793*^6, 12541., 
  11165.429, 115199., 262., 255.143, 3230.493, 9.355, 8.329, 85.931, 0.195, 
  0.19, "", "", "", "", "", "", "", "", "", "", "", "", "", "", "", "", "", 
  "", 1.3852802*^7, 9.667716*^6, 4.477593*^6, 155075., 281394., 1.03, 0.72, 
  0.33, 210., "", 1.340598113*^9, "", "", "", "", "", "", "", "", "", "", "", 
  "", "", ""}, {"OWID_AFR", "", "Africa", "2021-04-10", 4.340514*^6, 9721., 
  11299.714, 115422., 223., 263., 3237.744, 7.251, 8.429, 86.097, 0.166, 
  0.196, "", "", "", "", "", "", "", "", "", "", "", "", "", "", "", "", "", 
  "", 1.4012728*^7, 9.789075*^6, 4.516916*^6, 159926., 284921., 1.05, 0.73, 
  0.34, 213., "", 1.340598113*^9, "", "", "", "", "", "", "", "", "", "", "", 
  "", "", ""}, {"OWID_AFR", "", "Africa", "2021-04-11", 4.350198*^6, 9684., 
  11325.571, 115710., 288., 265.286, 3244.968, 7.224, 8.448, 86.312, 0.215, 
  0.198, "", "", "", "", "", "", "", "", "", "", "", "", "", "", "", "", "", 
  "", 1.4162114*^7, 9.924158*^6, 4.531219*^6, 149386., 297126., 1.06, 0.74, 
  0.34, 222., "", 1.340598113*^9, "", "", "", "", "", "", "", "", "", "", "", 
  "", "", ""}, {"OWID_AFR", "", "Africa", "2021-04-12", 4.360387*^6, 10189., 
  11459.143, 115974., 264., 270.143, 3252.568, 7.6, 8.548, 86.509, 0.197, 
  0.202, "", "", "", "", "", "", "", "", "", "", "", "", "", "", "", "", "", 
  "", 1.4271533*^7, 1.0035075*^7, 4.533119*^6, 109419., 290828., 1.06, 0.75, 
  0.34, 217., "", 1.340598113*^9, "", "", "", "", "", "", "", "", "", "", "", 
  "", "", ""}, {"OWID_AFR", "", "Africa", "2021-04-13", 4.370297*^6, 9910., 
  11506.857, 116378., 404., 294.143, 3259.961, 7.392, 8.583, 86.811, 0.301, 
  0.219, "", "", "", "", "", "", "", "", "", "", "", "", "", "", "", "", "", 
  "", 1.4370977*^7, 1.012451*^7, 4.545964*^6, 99444., 256563., 1.07, 0.76, 
  0.34, 191., "", 1.340598113*^9, "", "", "", "", "", "", "", "", "", "", "", 
  "", "", ""}, {"OWID_AFR", "", "Africa", "2021-04-14", 4.384217*^6, 13920., 
  11827.714, 116746., 368., 308.571, 3270.344, 10.383, 8.823, 87.085, 0.275, 
  0.23, "", "", "", "", "", "", "", "", "", "", "", "", "", "", "", "", "", 
  "", 1.4732385*^7, 1.0473338*^7, 4.558759*^6, 361408., 253161., 1.1, 0.78, 
  0.34, 189., "", 1.340598113*^9, "", "", "", "", "", "", "", "", "", "", "", 
  "", "", ""}, {"OWID_AFR", "", "Africa", "2021-04-15", 4.396924*^6, 12707., 
  11238.857, 117059., 313., 303.143, 3279.823, 9.479, 8.383, 87.318, 0.233, 
  0.226, "", "", "", "", "", "", "", "", "", "", "", "", "", "", "", "", "", 
  "", 1.4856238*^7, 1.0561218*^7, 4.587643*^6, 123853., 165502., 1.11, 0.79, 
  0.34, 123., "", 1.340598113*^9, "", "", "", "", "", "", "", "", "", "", "", 
  "", "", ""}, {"OWID_AFR", "", "Africa", "2021-04-16", 4.408953*^6, 12029., 
  11165.714, 117366., 307., 309.571, 3288.795, 8.973, 8.329, 87.547, 0.229, 
  0.231, "", "", "", "", "", "", "", "", "", "", "", "", "", "", "", "", "", 
  "", 1.5083479*^7, 1.077525*^7, 4.600852*^6, 227241., 175811., 1.13, 0.8, 
  0.34, 131., "", 1.340598113*^9, "", "", "", "", "", "", "", "", "", "", "", 
  "", "", ""}, {"OWID_AFR", "", "Africa", "2021-04-17", 4.422316*^6, 13363., 
  11686., 117646., 280., 317.714, 3298.763, 9.968, 8.717, 87.756, 0.209, 
  0.237, "", "", "", "", "", "", "", "", "", "", "", "", "", "", "", "", "", 
  "", 1.5381972*^7, 1.1066612*^7, 4.607983*^6, 298493., 195606., 1.15, 0.83, 
  0.34, 146., "", 1.340598113*^9, "", "", "", "", "", "", "", "", "", "", "", 
  "", "", ""}, {"OWID_AFR", "", "Africa", "2021-04-18", 4.43164*^6, 9324., 
  11634.571, 117898., 252., 312.571, 3305.719, 6.955, 8.679, 87.944, 0.188, 
  0.233, "", "", "", "", "", "", "", "", "", "", "", "", "", "", "", "", "", 
  "", 1.5949649*^7, 1.1612009*^7, 4.630263*^6, 567677., 255362., 1.19, 0.87, 
  0.35, 190., "", 1.340598113*^9, "", "", "", "", "", "", "", "", "", "", "", 
  "", "", ""}, {"OWID_AFR", "", "Africa", "2021-04-19", 4.440393*^6, 8753., 
  11429.429, 118197., 299., 317.571, 3312.248, 6.529, 8.526, 88.167, 0.223, 
  0.237, "", "", "", "", "", "", "", "", "", "", "", "", "", "", "", "", "", 
  "", 1.6165548*^7, 1.1809547*^7, 4.648624*^6, 215899., 270574., 1.21, 0.88, 
  0.35, 202., "", 1.340598113*^9, "", "", "", "", "", "", "", "", "", "", "", 
  "", "", ""}, {"OWID_AFR", "", "Africa", "2021-04-20", 4.450504*^6, 10111., 
  11458.143, 118608., 411., 318.571, 3319.79, 7.542, 8.547, 88.474, 0.307, 
  0.238, "", "", "", "", "", "", "", "", "", "", "", "", "", "", "", "", "", 
  "", 1.6331855*^7, 1.196057*^7, 4.663908*^6, 166307., 280125., 1.22, 0.89, 
  0.35, 209., "", 1.340598113*^9, "", "", "", "", "", "", "", "", "", "", "", 
  "", "", ""}, {"OWID_AFR", "", "Africa", "2021-04-21", 4.462371*^6, 11867., 
  11164.857, 118919., 311., 310.429, 3328.642, 8.852, 8.328, 88.706, 0.232, 
  0.232, "", "", "", "", "", "", "", "", "", "", "", "", "", "", "", "", "", 
  "", 1.6544427*^7, 1.2156964*^7, 4.680086*^6, 212572., 258863., 1.23, 0.91, 
  0.35, 193., "", 1.340598113*^9, "", "", "", "", "", "", "", "", "", "", "", 
  "", "", ""}, {"OWID_AFR", "", "Africa", "2021-04-22", 4.47495*^6, 12579., 
  11146.571, 119227., 308., 309.714, 3338.025, 9.383, 8.315, 88.936, 0.23, 
  0.231, "", "", "", "", "", "", "", "", "", "", "", "", "", "", "", "", "", 
  "", 1.6648789*^7, 1.2243149*^7, 4.698263*^6, 104362., 256079., 1.24, 0.91, 
  0.35, 191., "", 1.340598113*^9, "", "", "", "", "", "", "", "", "", "", "", 
  "", "", ""}, {"OWID_AFR", "", "Africa", "2021-04-23", 4.487054*^6, 12104., 
  11157.286, 119604., 377., 319.714, 3347.054, 9.029, 8.323, 89.217, 0.281, 
  0.238, "", "", "", "", "", "", "", "", "", "", "", "", "", "", "", "", "", 
  "", 1.6834942*^7, 1.2408548*^7, 4.719017*^6, 186153., 250209., 1.26, 0.93, 
  0.35, 187., "", 1.340598113*^9, "", "", "", "", "", "", "", "", "", "", "", 
  "", "", ""}, {"OWID_AFR", "", "Africa", "2021-04-24", 4.497207*^6, 10153., 
  10698.714, 119841., 237., 313.571, 3354.627, 7.573, 7.981, 89.394, 0.177, 
  0.234, "", "", "", "", "", "", "", "", "", "", "", "", "", "", "", "", "", 
  "", 1.6889942*^7, 1.2454393*^7, 4.728172*^6, 55000., 215424., 1.26, 0.93, 
  0.35, 161., "", 1.340598113*^9, "", "", "", "", "", "", "", "", "", "", "", 
  "", "", ""}, {"OWID_AFR", "", "Africa", "2021-04-25", 4.506744*^6, 9537., 
  10729.143, 120132., 291., 319.143, 3361.741, 7.114, 8.003, 89.611, 0.217, 
  0.238, "", "", "", "", "", "", "", "", "", "", "", "", "", "", "", "", "", 
  "", 1.6969006*^7, 1.2520419*^7, 4.74121*^6, 79064., 145622., 1.27, 0.93, 
  0.35, 109., "", 1.340598113*^9, "", "", "", "", "", "", "", "", "", "", "", 
  "", "", ""}, {"OWID_AFR", "", "Africa", "2021-04-26", 4.513541*^6, 6797., 
  10449.714, 120427., 295., 318.571, 3366.811, 5.07, 7.795, 89.831, 0.22, 
  0.238, "", "", "", "", "", "", "", "", "", "", "", "", "", "", "", "", "", 
  "", 1.706809*^7, 1.2604524*^7, 4.756189*^6, 99084., 128935., 1.27, 0.94, 
  0.35, 96., "", 1.340598113*^9, "", "", "", "", "", "", "", "", "", "", "", 
  "", "", ""}, {"OWID_AFR", "", "Africa", "2021-04-27", 4.523057*^6, 9516., 
  10364.714, 120793., 366., 312.143, 3373.91, 7.098, 7.731, 90.104, 0.273, 
  0.233, "", "", "", "", "", "", "", "", "", "", "", "", "", "", "", "", "", 
  "", 1.7236966*^7, 1.2746366*^7, 4.783223*^6, 168876., 129302., 1.29, 0.95, 
  0.36, 96., "", 1.340598113*^9, "", "", "", "", "", "", "", "", "", "", "", 
  "", "", ""}, {"OWID_AFR", "", "Africa", "2021-04-28", 4.532581*^6, 9524., 
  10030., 121133., 340., 316.286, 3381.014, 7.104, 7.482, 90.357, 0.254, 
  0.236, "", "", "", "", "", "", "", "", "", "", "", "", "", "", "", "", "", 
  "", 1.8296589*^7, 1.3765818*^7, 4.828924*^6, 1.059623*^6, 250309., 1.36, 
  1.03, 0.36, 187., "", 1.340598113*^9, "", "", "", "", "", "", "", "", "", 
  "", "", "", "", ""}, {"OWID_AFR", "", "Africa", "2021-04-29", 4.54818*^6, 
  15599., 10461.429, 121529., 396., 328.857, 3392.65, 11.636, 7.804, 90.653, 
  0.295, 0.245, "", "", "", "", "", "", "", "", "", "", "", "", "", "", "", 
  "", "", "", 1.8389755*^7, 1.3849934*^7, 4.847412*^6, 93166., 248709., 1.37, 
  1.03, 0.36, 186., "", 1.340598113*^9, "", "", "", "", "", "", "", "", "", 
  "", "", "", "", ""}, {"OWID_AFR", "", "Africa", "2021-04-30", 4.557699*^6, 
  9519., 10092.143, 121784., 255., 311.429, 3399.75, 7.101, 7.528, 90.843, 
  0.19, 0.232, "", "", "", "", "", "", "", "", "", "", "", "", "", "", "", 
  "", "", "", 1.8553655*^7, 1.3988176*^7, 4.883135*^6, 163900., 245530., 
  1.38, 1.04, 0.36, 183., "", 1.340598113*^9, "", "", "", "", "", "", "", "", 
  "", "", "", "", "", ""}, {"OWID_AFR", "", "Africa", "2021-05-01", 
  4.565548*^6, 7849., 9763., 122068., 284., 318.143, 3405.605, 5.855, 7.283, 
  91.055, 0.212, 0.237, "", "", "", "", "", "", "", "", "", "", "", "", "", 
  "", "", "", "", "", 1.8680584*^7, 1.4102884*^7, 4.89637*^6, 126929., 
  255806., 1.39, 1.05, 0.37, 191., "", 1.340598113*^9, "", "", "", "", "", 
  "", "", "", "", "", "", "", "", ""}, {"OWID_AFR", "", "Africa", 
  "2021-05-02", 4.571597*^6, 6049., 9264.714, 122297., 229., 309.286, 
  3410.117, 4.512, 6.911, 91.226, 0.171, 0.231, "", "", "", "", "", "", "", 
  "", "", "", "", "", "", "", "", "", "", "", 1.8737275*^7, 1.4151044*^7, 
  4.904901*^6, 56691., 252610., 1.4, 1.06, 0.37, 188., "", 1.340598113*^9, 
  "", "", "", "", "", "", "", "", "", "", "", "", "", ""}, 
 {"OWID_AFR", "", "Africa", "2021-05-03", 4.578852*^6, 7255., 9330.143, 
  122554., 257., 303.857, 3415.529, 5.412, 6.96, 91.417, 0.192, 0.227, "", 
  "", "", "", "", "", "", "", "", "", "", "", "", "", "", "", "", "", 
  1.8912422*^7, 1.4294358*^7, 4.947162*^6, 175147., 263476., 1.41, 1.07, 
  0.37, 197., "", 1.340598113*^9, "", "", "", "", "", "", "", "", "", "", "", 
  "", "", ""}, {"OWID_AFR", "", "Africa", "2021-05-04", 4.586033*^6, 7181., 
  8996.571, 122889., 335., 299.429, 3420.886, 5.357, 6.711, 91.667, 0.25, 
  0.223, "", "", "", "", "", "", "", "", "", "", "", "", "", "", "", "", "", 
  "", 1.9208548*^7, 1.453406*^7, 5.027669*^6, 296126., 281655., 1.43, 1.08, 
  0.38, 210., "", 1.340598113*^9, "", "", "", "", "", "", "", "", "", "", "", 
  "", "", ""}, {"OWID_AFR", "", "Africa", "2021-05-05", 4.595309*^6, 9276., 
  8961.143, 123233., 344., 300., 3427.805, 6.919, 6.684, 91.924, 0.257, 
  0.224, "", "", "", "", "", "", "", "", "", "", "", "", "", "", "", "", "", 
  "", 1.9465178*^7, 1.4750881*^7, 5.082089*^6, 256630., 166941., 1.45, 1.1, 
  0.38, 125., "", 1.340598113*^9, "", "", "", "", "", "", "", "", "", "", "", 
  "", "", ""}, {"OWID_AFR", "", "Africa", "2021-05-06", 4.608099*^6, 12790., 
  8559.857, 123616., 383., 298.143, 3437.346, 9.541, 6.385, 92.21, 0.286, 
  0.222, "", "", "", "", "", "", "", "", "", "", "", "", "", "", "", "", "", 
  "", 1.9624749*^7, 1.4884557*^7, 5.107984*^6, 159571., 176428., 1.46, 1.11, 
  0.38, 132., "", 1.340598113*^9, "", "", "", "", "", "", "", "", "", "", "", 
  "", "", ""}, {"OWID_AFR", "", "Africa", "2021-05-07", 4.616997*^6, 8898., 
  8471.143, 123905., 289., 303., 3443.983, 6.637, 6.319, 92.425, 0.216, 
  0.226, "", "", "", "", "", "", "", "", "", "", "", "", "", "", "", "", "", 
  "", 2.0217788*^7, 1.5433666*^7, 5.166984*^6, 593039., 237733., 1.51, 1.15, 
  0.39, 177., "", 1.340598113*^9, "", "", "", "", "", "", "", "", "", "", "", 
  "", "", ""}, {"OWID_AFR", "", "Africa", "2021-05-08", 4.623004*^6, 6007., 
  8208., 124137., 232., 295.571, 3448.464, 4.481, 6.123, 92.598, 0.173, 0.22, 
  "", "", "", "", "", "", "", "", "", "", "", "", "", "", "", "", "", "", 
  2.0470315*^7, 1.5587003*^7, 5.265792*^6, 252527., 255676., 1.53, 1.16, 
  0.39, 191., "", 1.340598113*^9, "", "", "", "", "", "", "", "", "", "", "", 
  "", "", ""}, {"OWID_AFR", "", "Africa", "2021-05-09", 4.632506*^6, 9502., 
  8701.286, 124394., 257., 299.571, 3455.552, 7.088, 6.491, 92.79, 0.192, 
  0.223, "", "", "", "", "", "", "", "", "", "", "", "", "", "", "", "", "", 
  "", 2.1199786*^7, 1.6063514*^7, 5.518752*^6, 729471., 351787., 1.58, 1.2, 
  0.41, 262., "", 1.340598113*^9, "", "", "", "", "", "", "", "", "", "", "", 
  "", "", ""}, {"OWID_AFR", "", "Africa", "2021-05-10", 4.641049*^6, 8543., 
  8885.286, 124745., 351., 313., 3461.924, 6.373, 6.628, 93.052, 0.262, 
  0.233, "", "", "", "", "", "", "", "", "", "", "", "", "", "", "", "", "", 
  "", 2.166119*^7, 1.6498949*^7, 5.557471*^6, 461404., 392681., 1.62, 1.23, 
  0.41, 293., "", 1.340598113*^9, "", "", "", "", "", "", "", "", "", "", "", 
  "", "", ""}, {"OWID_AFR", "", "Africa", "2021-05-11", 4.648116*^6, 7067., 
  8869., 125059., 314., 310., 3467.196, 5.272, 6.616, 93.286, 0.234, 0.231, 
  "", "", "", "", "", "", "", "", "", "", "", "", "", "", "", "", "", "", 
  2.2093431*^7, 1.6908219*^7, 5.599584*^6, 432241., 412126., 1.65, 1.26, 
  0.42, 307., "", 1.340598113*^9, "", "", "", "", "", "", "", "", "", "", "", 
  "", "", ""}, {"OWID_AFR", "", "Africa", "2021-05-12", 4.656979*^6, 8863., 
  8810., 125363., 304., 304.286, 3473.807, 6.611, 6.572, 93.513, 0.227, 
  0.227, "", "", "", "", "", "", "", "", "", "", "", "", "", "", "", "", "", 
  "", 2.3173695*^7, 1.7814971*^7, 5.789454*^6, 1.080264*^6, 529788., 1.73, 
  1.33, 0.43, 395., "", 1.340598113*^9, "", "", "", "", "", "", "", "", "", 
  "", "", "", "", ""}, {"OWID_AFR", "", "Africa", "2021-05-13", 4.666422*^6, 
  9443., 8331.857, 125597., 234., 283., 3480.851, 7.044, 6.215, 93.687, 
  0.175, 0.211, "", "", "", "", "", "", "", "", "", "", "", "", "", "", "", 
  "", "", "", 2.3349124*^7, 1.7978803*^7, 5.82549*^6, 175429., 532054., 1.74, 
  1.34, 0.43, 397., "", 1.340598113*^9, "", "", "", "", "", "", "", "", "", 
  "", "", "", "", ""}, {"OWID_AFR", "", "Africa", "2021-05-14", 4.674423*^6, 
  8001., 8203.714, 125848., 251., 277.571, 3486.819, 5.968, 6.119, 93.875, 
  0.187, 0.207, "", "", "", "", "", "", "", "", "", "", "", "", "", "", "", 
  "", "", "", 2.3545234*^7, 1.8121639*^7, 5.859615*^6, 196110., 475349., 
  1.76, 1.35, 0.44, 355., "", 1.340598113*^9, "", "", "", "", "", "", "", "", 
  "", "", "", "", "", ""}, {"OWID_AFR", "", "Africa", "2021-05-15", 
  4.681225*^6, 6802., 8317.286, 126088., 240., 278.714, 3491.893, 5.074, 
  6.204, 94.054, 0.179, 0.208, "", "", "", "", "", "", "", "", "", "", "", 
  "", "", "", "", "", "", "", 2.385932*^7, 1.8358349*^7, 5.932857*^6, 
  314086., 484144., 1.78, 1.37, 0.44, 361., "", 1.340598113*^9, "", "", "", 
  "", "", "", "", "", "", "", "", "", "", ""}, 
 {"OWID_AFR", "", "Africa", "2021-05-16", 4.688159*^6, 6934., 7950.429, 
  126311., 223., 273.857, 3497.065, 5.172, 5.931, 94.22, 0.166, 0.204, "", 
  "", "", "", "", "", "", "", "", "", "", "", "", "", "", "", "", "", 
  2.3952448*^7, 1.8441824*^7, 5.942229*^6, 93128., 393237., 1.79, 1.38, 0.44, 
  293., "", 1.340598113*^9, "", "", "", "", "", "", "", "", "", "", "", "", 
  "", ""}, {"OWID_AFR", "", "Africa", "2021-05-17", 4.695992*^6, 7833., 
  7849., 126572., 261., 261., 3502.908, 5.843, 5.855, 94.415, 0.195, 0.195, 
  "", "", "", "", "", "", "", "", "", "", "", "", "", "", "", "", "", "", 
  2.4419413*^7, 1.8824103*^7, 6.009508*^6, 466965., 394032., 1.82, 1.4, 0.45, 
  294., "", 1.340598113*^9, "", "", "", "", "", "", "", "", "", "", "", "", 
  "", ""}, {"OWID_AFR", "", "Africa", "2021-05-18", 4.706525*^6, 10533., 
  8344.143, 126889., 317., 261.429, 3510.765, 7.857, 6.224, 94.651, 0.236, 
  0.195, "", "", "", "", "", "", "", "", "", "", "", "", "", "", "", "", "", 
  "", 2.5194315*^7, 1.9412021*^7, 6.156083*^6, 774902., 442983., 1.88, 1.45, 
  0.46, 330., "", 1.340598113*^9, "", "", "", "", "", "", "", "", "", "", "", 
  "", "", ""}, {"OWID_AFR", "", "Africa", "2021-05-19", 4.716496*^6, 9971., 
  8502.429, 127244., 355., 268.714, 3518.203, 7.438, 6.342, 94.916, 0.265, 
  0.2, "", "", "", "", "", "", "", "", "", "", "", "", "", "", "", "", "", 
  "", 2.5763252*^7, 1.982464*^7, 6.27337*^6, 568937., 369937., 1.92, 1.48, 
  0.47, 276., "", 1.340598113*^9, "", "", "", "", "", "", "", "", "", "", "", 
  "", "", ""}, {"OWID_AFR", "", "Africa", "2021-05-20", 4.727889*^6, 11393., 
  8781., 127614., 370., 288.143, 3526.701, 8.498, 6.55, 95.192, 0.276, 0.215, 
  "", "", "", "", "", "", "", "", "", "", "", "", "", "", "", "", "", "", 
  2.6225248*^7, 2.0159569*^7, 6.361201*^6, 461996., 410875., 1.96, 1.5, 0.47, 
  306., "", 1.340598113*^9, "", "", "", "", "", "", "", "", "", "", "", "", 
  "", ""}, {"OWID_AFR", "", "Africa", "2021-05-21", 4.737956*^6, 10067., 
  9076.143, 127983., 369., 305., 3534.211, 7.509, 6.77, 95.467, 0.275, 0.228, 
  "", "", "", "", "", "", "", "", "", "", "", "", "", "", "", "", "", "", 
  2.698732*^7, 2.0591925*^7, 6.614796*^6, 762072., 491727., 2.01, 1.54, 0.49, 
  367., "", 1.340598113*^9, "", "", "", "", "", "", "", "", "", "", "", "", 
  "", ""}, {"OWID_AFR", "", "Africa", "2021-05-22", 4.747809*^6, 9853., 
  9512., 128192., 209., 300.571, 3541.56, 7.35, 7.095, 95.623, 0.156, 0.224, 
  "", "", "", "", "", "", "", "", "", "", "", "", "", "", "", "", "", "", 
  2.7823506*^7, 2.1500322*^7, 6.755294*^6, 836186., 566312., 2.08, 1.6, 0.5, 
  422., "", 1.340598113*^9, "", "", "", "", "", "", "", "", "", "", "", "", 
  "", ""}, {"OWID_AFR", "", "Africa", "2021-05-23", 4.755948*^6, 8139., 
  9684.143, 128393., 201., 297.429, 3547.631, 6.071, 7.224, 95.773, 0.15, 
  0.222, "", "", "", "", "", "", "", "", "", "", "", "", "", "", "", "", "", 
  "", 2.8049976*^7, 2.1697894*^7, 6.779155*^6, 226470., 585361., 2.09, 1.62, 
  0.51, 437., "", 1.340598113*^9, "", "", "", "", "", "", "", "", "", "", "", 
  "", "", ""}, {"OWID_AFR", "", "Africa", "2021-05-24", 4.765208*^6, 9260., 
  9888., 128677., 284., 300.714, 3554.539, 6.907, 7.376, 95.985, 0.212, 
  0.224, "", "", "", "", "", "", "", "", "", "", "", "", "", "", "", "", "", 
  "", 2.8511478*^7, 2.207621*^7, 6.845969*^6, 461502., 584581., 2.13, 1.65, 
  0.51, 436., "", 1.340598113*^9, "", "", "", "", "", "", "", "", "", "", "", 
  "", "", ""}, {"OWID_AFR", "", "Africa", "2021-05-25", 4.771033*^6, 5825., 
  9215.429, 128956., 279., 295.286, 3558.884, 4.345, 6.874, 96.193, 0.208, 
  0.22, "", "", "", "", "", "", "", "", "", "", "", "", "", "", "", "", "", 
  "", 2.9211869*^7, 2.2573286*^7, 7.000008*^6, 700391., 573936., 2.18, 1.68, 
  0.52, 428., "", 1.340598113*^9, "", "", "", "", "", "", "", "", "", "", "", 
  "", "", ""}, {"OWID_AFR", "", "Africa", "2021-05-26", 4.785104*^6, 14071., 
  9801.143, 129259., 303., 287.857, 3569.38, 10.496, 7.311, 96.419, 0.226, 
  0.215, "", "", "", "", "", "", "", "", "", "", "", "", "", "", "", "", "", 
  "", 2.953207*^7, 2.2768087*^7, 7.129537*^6, 320201., 538403., 2.2, 1.7, 
  0.53, 402., "", 1.340598113*^9, "", "", "", "", "", "", "", "", "", "", "", 
  "", "", ""}, {"OWID_AFR", "", "Africa", "2021-05-27", 4.796975*^6, 11871., 
  9869.429, 129551., 292., 276.714, 3578.235, 8.855, 7.362, 96.637, 0.218, 
  0.206, "", "", "", "", "", "", "", "", "", "", "", "", "", "", "", "", "", 
  "", 2.9683971*^7, 2.2896428*^7, 7.153097*^6, 151901., 494103., 2.21, 1.71, 
  0.53, 369., "", 1.340598113*^9, "", "", "", "", "", "", "", "", "", "", "", 
  "", "", ""}, {"OWID_AFR", "", "Africa", "2021-05-28", 4.809315*^6, 12340., 
  10194.143, 129851., 300., 266.857, 3587.44, 9.205, 7.604, 96.86, 0.224, 
  0.199, "", "", "", "", "", "", "", "", "", "", "", "", "", "", "", "", "", 
  "", 2.9800379*^7, 2.296461*^7, 7.191241*^6, 116408., 401866., 2.22, 1.71, 
  0.54, 300., "", 1.340598113*^9, "", "", "", "", "", "", "", "", "", "", "", 
  "", "", ""}, {"OWID_AFR", "", "Africa", "2021-05-29", 4.821025*^6, 11710., 
  10459.429, 130104., 253., 273.143, 3596.175, 8.735, 7.802, 97.049, 0.189, 
  0.204, "", "", "", "", "", "", "", "", "", "", "", "", "", "", "", "", "", 
  "", 3.0593669*^7, 2.3504865*^7, 7.246225*^6, 793290., 395738., 2.28, 1.75, 
  0.54, 295., "", 1.340598113*^9, "", "", "", "", "", "", "", "", "", "", "", 
  "", "", ""}, {"OWID_AFR", "", "Africa", "2021-05-30", 4.826891*^6, 5866., 
  10134.714, 130304., 200., 273., 3600.55, 4.376, 7.56, 97.198, 0.149, 0.204, 
  "", "", "", "", "", "", "", "", "", "", "", "", "", "", "", "", "", "", 
  3.0979265*^7, 2.3758177*^7, 7.313588*^6, 385596., 418470., 2.31, 1.77, 
  0.55, 312., "", 1.340598113*^9, "", "", "", "", "", "", "", "", "", "", "", 
  "", "", ""}, {"OWID_AFR", "", "Africa", "2021-05-31", 4.84046*^6, 13569., 
  10750.286, 130636., 332., 279.857, 3610.672, 10.122, 8.019, 97.446, 0.248, 
  0.209, "", "", "", "", "", "", "", "", "", "", "", "", "", "", "", "", "", 
  "", 3.2938883*^7, 2.4567651*^7, 8.449375*^6, 1.959618*^6, 632486., 2.46, 
  1.83, 0.63, 472., "", 1.340598113*^9, "", "", "", "", "", "", "", "", "", 
  "", "", "", "", ""}, {"OWID_AFR", "", "Africa", "2021-06-01", 4.850462*^6, 
  10002., 11347., 130956., 320., 285.714, 3618.133, 7.461, 8.464, 97.685, 
  0.239, 0.213, "", "", "", "", "", "", "", "", "", "", "", "", "", "", "", 
  "", "", "", 3.3739381*^7, 2.5055833*^7, 8.687075*^6, 800498., 646787., 
  2.52, 1.87, 0.65, 482., "", 1.340598113*^9, "", "", "", "", "", "", "", "", 
  "", "", "", "", "", ""}, {"OWID_AFR", "", "Africa", "2021-06-02", 
  4.864178*^6, 13716., 11296.286, 131267., 311., 286.857, 3628.364, 10.231, 
  8.426, 97.917, 0.232, 0.214, "", "", "", "", "", "", "", "", "", "", "", 
  "", "", "", "", "", "", "", 3.4237976*^7, 2.5297758*^7, 8.87128*^6, 
  498595., 672272., 2.55, 1.89, 0.66, 501., "", 1.340598113*^9, "", "", "", 
  "", "", "", "", "", "", "", "", "", "", ""}, 
 {"OWID_AFR", "", "Africa", "2021-06-03", 4.8788*^6, 14622., 11689.286, 
  131516., 249., 280.714, 3639.271, 10.907, 8.719, 98.102, 0.186, 0.209, "", 
  "", "", "", "", "", "", "", "", "", "", "", "", "", "", "", "", "", 
  3.4703924*^7, 2.5566223*^7, 8.99217*^6, 465948., 717136., 2.59, 1.91, 0.67, 
  535., "", 1.340598113*^9, "", "", "", "", "", "", "", "", "", "", "", "", 
  "", ""}, {"OWID_AFR", "", "Africa", "2021-06-04", 4.894158*^6, 15358., 
  12120.429, 131794., 278., 277.571, 3650.727, 11.456, 9.041, 98.31, 0.207, 
  0.207, "", "", "", "", "", "", "", "", "", "", "", "", "", "", "", "", "", 
  "", 3.4992652*^7, 2.5645802*^7, 9.128588*^6, 288728., 741753., 2.61, 1.91, 
  0.68, 553., "", 1.340598113*^9, "", "", "", "", "", "", "", "", "", "", "", 
  "", "", ""}, {"OWID_AFR", "", "Africa", "2021-06-05", 4.906711*^6, 12553., 
  12240.857, 132052., 258., 278.286, 3660.091, 9.364, 9.131, 98.502, 0.192, 
  0.208, "", "", "", "", "", "", "", "", "", "", "", "", "", "", "", "", "", 
  "", 3.5196946*^7, 2.5712466*^7, 9.196564*^6, 204294., 657611., 2.63, 1.92, 
  0.69, 491., "", 1.340598113*^9, "", "", "", "", "", "", "", "", "", "", "", 
  "", "", ""}, {"OWID_AFR", "", "Africa", "2021-06-06", 4.919397*^6, 12686., 
  13215.143, 132300., 248., 285.143, 3669.554, 9.463, 9.858, 98.687, 0.185, 
  0.213, "", "", "", "", "", "", "", "", "", "", "", "", "", "", "", "", "", 
  "", 3.7630525*^7, 2.81376*^7, 9.198123*^6, 2.433579*^6, 950180., 2.81, 2.1, 
  0.69, 709., "", 1.340598113*^9, "", "", "", "", "", "", "", "", "", "", "", 
  "", "", ""}, {"OWID_AFR", "", "Africa", "2021-06-07", 4.930955*^6, 11558., 
  12927.857, 132584., 284., 278.286, 3678.175, 8.622, 9.643, 98.899, 0.212, 
  0.208, "", "", "", "", "", "", "", "", "", "", "", "", "", "", "", "", "", 
  "", 3.8010043*^7, 2.824498*^7, 9.463449*^6, 379518., 724451., 2.84, 2.11, 
  0.71, 540., "", 1.340598113*^9, "", "", "", "", "", "", "", "", "", "", "", 
  "", "", ""}, {"ALB", "Europe", "Albania", "2020-02-25", "", "", "", "", "", 
  "", "", "", "", "", "", "", "", "", "", "", "", "", "", "", "", 8., 8., 
  0.003, 0.003, "", "", "", "", "tests performed", "", "", "", "", "", "", 
  "", "", "", 8.33, 2.8778*^6, 104.871, 38., 13.188, 8.643, 11803.431, 1.1, 
  304.195, 10.08, 7.1, 51.2, "", 2.89, 78.57, 0.795}, 
 {"ALB", "Europe", "Albania", "2020-02-26", "", "", "", "", "", "", "", "", 
  "", "", "", "", "", "", "", "", "", "", "", "", "", 5., 13., 0.005, 0.002, 
  "", "", "", "", "tests performed", "", "", "", "", "", "", "", "", "", 
  8.33, 2.8778*^6, 104.871, 38., 13.188, 8.643, 11803.431, 1.1, 304.195, 
  10.08, 7.1, 51.2, "", 2.89, 78.57, 0.795}, {"ALB", "Europe", "Albania", 
  "2020-02-27", "", "", "", "", "", "", "", "", "", "", "", "", "", "", "", 
  "", "", "", "", "", "", 4., 17., 0.006, 0.001, "", "", "", "", 
  "tests performed", "", "", "", "", "", "", "", "", "", 8.33, 2.8778*^6, 
  104.871, 38., 13.188, 8.643, 11803.431, 1.1, 304.195, 10.08, 7.1, 51.2, "", 
  2.89, 78.57, 0.795}, {"ALB", "Europe", "Albania", "2020-02-28", "", "", "", 
  "", "", "", "", "", "", "", "", "", "", "", "", "", "", "", "", "", "", 1., 
  18., 0.006, 0., "", "", "", "", "tests performed", "", "", "", "", "", "", 
  "", "", "", 8.33, 2.8778*^6, 104.871, 38., 13.188, 8.643, 11803.431, 1.1, 
  304.195, 10.08, 7.1, 51.2, "", 2.89, 78.57, 0.795}, 
 {"ALB", "Europe", "Albania", "2020-02-29", "", "", "", "", "", "", "", "", 
  "", "", "", "", "", "", "", "", "", "", "", "", "", 8., 26., 0.009, 0.003, 
  "", "", "", "", "tests performed", "", "", "", "", "", "", "", "", "", 
  8.33, 2.8778*^6, 104.871, 38., 13.188, 8.643, 11803.431, 1.1, 304.195, 
  10.08, 7.1, 51.2, "", 2.89, 78.57, 0.795}, {"ALB", "Europe", "Albania", 
  "2020-03-01", "", "", "", "", "", "", "", "", "", "", "", "", "", "", "", 
  "", "", "", "", "", "", 3., 29., 0.01, 0.001, "", "", "", "", 
  "tests performed", "", "", "", "", "", "", "", "", "", 8.33, 2.8778*^6, 
  104.871, 38., 13.188, 8.643, 11803.431, 1.1, 304.195, 10.08, 7.1, 51.2, "", 
  2.89, 78.57, 0.795}, {"ALB", "Europe", "Albania", "2020-03-02", "", "", "", 
  "", "", "", "", "", "", "", "", "", "", "", "", "", "", "", "", "", "", 2., 
  31., 0.011, 0.001, "", "", "", "", "tests performed", "", "", "", "", "", 
  "", "", "", "", 8.33, 2.8778*^6, 104.871, 38., 13.188, 8.643, 11803.431, 
  1.1, 304.195, 10.08, 7.1, 51.2, "", 2.89, 78.57, 0.795}, 
 {"ALB", "Europe", "Albania", "2020-03-03", "", "", "", "", "", "", "", "", 
  "", "", "", "", "", "", "", "", "", "", "", "", "", 5., 36., 0.013, 0.002, 
  4., 0.001, "", "", "tests performed", "", "", "", "", "", "", "", "", "", 
  8.33, 2.8778*^6, 104.871, 38., 13.188, 8.643, 11803.431, 1.1, 304.195, 
  10.08, 7.1, 51.2, "", 2.89, 78.57, 0.795}, {"ALB", "Europe", "Albania", 
  "2020-03-04", "", "", "", "", "", "", "", "", "", "", "", "", "", "", "", 
  "", "", "", "", "", "", 6., 42., 0.015, 0.002, 4., 0.001, "", "", 
  "tests performed", "", "", "", "", "", "", "", "", "", 8.33, 2.8778*^6, 
  104.871, 38., 13.188, 8.643, 11803.431, 1.1, 304.195, 10.08, 7.1, 51.2, "", 
  2.89, 78.57, 0.795}, {"ALB", "Europe", "Albania", "2020-03-05", "", "", "", 
  "", "", "", "", "", "", "", "", "", "", "", "", "", "", "", "", "", "", 8., 
  50., 0.017, 0.003, 5., 0.002, "", "", "tests performed", "", "", "", "", 
  "", "", "", "", "", 8.33, 2.8778*^6, 104.871, 38., 13.188, 8.643, 
  11803.431, 1.1, 304.195, 10.08, 7.1, 51.2, "", 2.89, 78.57, 0.795}, 
 {"ALB", "Europe", "Albania", "2020-03-06", "", "", "", "", "", "", "", "", 
  "", "", "", "", "", "", "", "", "", "", "", "", "", 3., 53., 0.018, 0.001, 
  5., 0.002, "", "", "tests performed", "", "", "", "", "", "", "", "", "", 
  8.33, 2.8778*^6, 104.871, 38., 13.188, 8.643, 11803.431, 1.1, 304.195, 
  10.08, 7.1, 51.2, "", 2.89, 78.57, 0.795}, {"ALB", "Europe", "Albania", 
  "2020-03-07", "", "", "", "", "", "", "", "", "", "", "", "", "", "", "", 
  "", "", "", "", "", "", 5., 58., 0.02, 0.002, 5., 0.002, "", "", 
  "tests performed", "", "", "", "", "", "", "", "", "", 8.33, 2.8778*^6, 
  104.871, 38., 13.188, 8.643, 11803.431, 1.1, 304.195, 10.08, 7.1, 51.2, "", 
  2.89, 78.57, 0.795}, {"ALB", "Europe", "Albania", "2020-03-08", "", "", "", 
  "", "", "", "", "", "", "", "", "", "", "", "", "", "", "", "", "", "", 1., 
  59., 0.021, 0., 4., 0.001, "", "", "tests performed", "", "", "", "", "", 
  "", "", "", "", 8.33, 2.8778*^6, 104.871, 38., 13.188, 8.643, 11803.431, 
  1.1, 304.195, 10.08, 7.1, 51.2, "", 2.89, 78.57, 0.795}, 
 {"ALB", "Europe", "Albania", "2020-03-09", 2., 2., "", "", "", "", 0.695, 
  0.695, "", "", "", "", "", "", "", "", "", "", "", "", "", 18., 77., 0.027, 
  0.006, 7., 0.002, "", "", "tests performed", "", "", "", "", "", "", "", 
  "", "", 36.11, 2.8778*^6, 104.871, 38., 13.188, 8.643, 11803.431, 1.1, 
  304.195, 10.08, 7.1, 51.2, "", 2.89, 78.57, 0.795}, 
 {"ALB", "Europe", "Albania", "2020-03-10", 10., 8., "", "", "", "", 3.475, 
  2.78, "", "", "", "", "", "", "", "", "", "", "", "", "", 37., 114., 0.04, 
  0.013, 11., 0.004, "", "", "tests performed", "", "", "", "", "", "", "", 
  "", "", 41.67, 2.8778*^6, 104.871, 38., 13.188, 8.643, 11803.431, 1.1, 
  304.195, 10.08, 7.1, 51.2, "", 2.89, 78.57, 0.795}, 
 {"ALB", "Europe", "Albania", "2020-03-11", 12., 2., "", 1., 1., "", 4.17, 
  0.695, "", 0.347, 0.347, "", "", "", "", "", "", "", "", "", "", 43., 157., 
  0.055, 0.015, 16., 0.006, "", "", "tests performed", "", "", "", "", "", 
  "", "", "", "", 51.85, 2.8778*^6, 104.871, 38., 13.188, 8.643, 11803.431, 
  1.1, 304.195, 10.08, 7.1, 51.2, "", 2.89, 78.57, 0.795}, 
 {"ALB", "Europe", "Albania", "2020-03-12", 23., 11., "", 1., 0., "", 7.992, 
  3.822, "", 0.347, 0., "", "", "", "", "", "", "", "", "", "", 141., 298., 
  0.104, 0.049, 35., 0.012, "", "", "tests performed", "", "", "", "", "", 
  "", "", "", "", 51.85, 2.8778*^6, 104.871, 38., 13.188, 8.643, 11803.431, 
  1.1, 304.195, 10.08, 7.1, 51.2, "", 2.89, 78.57, 0.795}, 
 {"ALB", "Europe", "Albania", "2020-03-13", 33., 10., "", 1., 0., "", 11.467, 
  3.475, "", 0.347, 0., "", "", "", "", "", "", "", "", "", "", 159., 457., 
  0.159, 0.055, 58., 0.02, "", "", "tests performed", "", "", "", "", "", "", 
  "", "", "", 78.7, 2.8778*^6, 104.871, 38., 13.188, 8.643, 11803.431, 1.1, 
  304.195, 10.08, 7.1, 51.2, "", 2.89, 78.57, 0.795}, 
 {"ALB", "Europe", "Albania", "2020-03-14", 38., 5., 5.429, 1., 0., 0.143, 
  13.205, 1.737, 1.886, 0.347, 0., 0.05, "", "", "", "", "", "", "", "", "", 
  48., 505., 0.175, 0.017, 64., 0.022, 0.085, 11.8, "tests performed", "", 
  "", "", "", "", "", "", "", "", 78.7, 2.8778*^6, 104.871, 38., 13.188, 
  8.643, 11803.431, 1.1, 304.195, 10.08, 7.1, 51.2, "", 2.89, 78.57, 0.795}, 
 {"ALB", "Europe", "Albania", "2020-03-15", 42., 4., 6., 1., 0., 0.143, 
  14.594, 1.39, 2.085, 0.347, 0., 0.05, "", "", "", "", "", "", "", "", "", 
  27., 532., 0.185, 0.009, 68., 0.024, 0.088, 11.3, "tests performed", "", 
  "", "", "", "", "", "", "", "", 81.48, 2.8778*^6, 104.871, 38., 13.188, 
  8.643, 11803.431, 1.1, 304.195, 10.08, 7.1, 51.2, "", 2.89, 78.57, 0.795}, 
 {"ALB", "Europe", "Albania", "2020-03-16", 51., 9., 7., 1., 0., 0.143, 
  17.722, 3.127, 2.432, 0.347, 0., 0.05, "", "", "", "", "", "", "", "", "", 
  31., 563., 0.196, 0.011, 69., 0.024, 0.101, 9.9, "tests performed", "", "", 
  "", "", "", "", "", "", "", 81.48, 2.8778*^6, 104.871, 38., 13.188, 8.643, 
  11803.431, 1.1, 304.195, 10.08, 7.1, 51.2, "", 2.89, 78.57, 0.795}, 
 {"ALB", "Europe", "Albania", "2020-03-17", 55., 4., 6.429, 1., 0., 0.143, 
  19.112, 1.39, 2.234, 0.347, 0., 0.05, "", "", "", "", "", "", "", "", "", 
  42., 605., 0.21, 0.015, 70., 0.024, 0.092, 10.9, "tests performed", "", "", 
  "", "", "", "", "", "", "", 81.48, 2.8778*^6, 104.871, 38., 13.188, 8.643, 
  11803.431, 1.1, 304.195, 10.08, 7.1, 51.2, "", 2.89, 78.57, 0.795}, 
 {"ALB", "Europe", "Albania", "2020-03-18", 59., 4., 6.714, 2., 1., 0.143, 
  20.502, 1.39, 2.333, 0.695, 0.347, 0.05, "", "", "", "", "", "", "", "", 
  "", 60., 665., 0.231, 0.021, 73., 0.025, 0.092, 10.9, "tests performed", 
  "", "", "", "", "", "", "", "", "", 81.48, 2.8778*^6, 104.871, 38., 13.188, 
  8.643, 11803.431, 1.1, 304.195, 10.08, 7.1, 51.2, "", 2.89, 78.57, 0.795}, 
 {"ALB", "Europe", "Albania", "2020-03-19", 64., 5., 5.857, 2., 0., 0.143, 
  22.239, 1.737, 2.035, 0.695, 0., 0.05, "", "", "", "", "", "", "", "", "", 
  32., 697., 0.242, 0.011, 57., 0.02, 0.103, 9.7, "tests performed", "", "", 
  "", "", "", "", "", "", "", 81.48, 2.8778*^6, 104.871, 38., 13.188, 8.643, 
  11803.431, 1.1, 304.195, 10.08, 7.1, 51.2, "", 2.89, 78.57, 0.795}, 
 {"ALB", "Europe", "Albania", "2020-03-20", 70., 6., 5.286, 2., 0., 0.143, 
  24.324, 2.085, 1.837, 0.695, 0., 0.05, "", "", "", "", "", "", "", "", "", 
  35., 732., 0.254, 0.012, 39., 0.014, 0.136, 7.4, "tests performed", "", "", 
  "", "", "", "", "", "", "", 81.48, 2.8778*^6, 104.871, 38., 13.188, 8.643, 
  11803.431, 1.1, 304.195, 10.08, 7.1, 51.2, "", 2.89, 78.57, 0.795}, 
 {"ALB", "Europe", "Albania", "2020-03-21", 76., 6., 5.429, 2., 0., 0.143, 
  26.409, 2.085, 1.886, 0.695, 0., 0.05, "", "", "", "", "", "", "", "", "", 
  46., 778., 0.27, 0.016, 39., 0.014, 0.139, 7.2, "tests performed", "", "", 
  "", "", "", "", "", "", "", 81.48, 2.8778*^6, 104.871, 38., 13.188, 8.643, 
  11803.431, 1.1, 304.195, 10.08, 7.1, 51.2, "", 2.89, 78.57, 0.795}, 
 {"ALB", "Europe", "Albania", "2020-03-22", 89., 13., 6.714, 2., 0., 0.143, 
  30.926, 4.517, 2.333, 0.695, 0., 0.05, "", "", "", "", "", "", "", "", "", 
  33., 811., 0.282, 0.011, 40., 0.014, 0.168, 6., "tests performed", "", "", 
  "", "", "", "", "", "", "", 81.48, 2.8778*^6, 104.871, 38., 13.188, 8.643, 
  11803.431, 1.1, 304.195, 10.08, 7.1, 51.2, "", 2.89, 78.57, 0.795}, 
 {"ALB", "Europe", "Albania", "2020-03-23", 104., 15., 7.571, 4., 2., 0.429, 
  36.139, 5.212, 2.631, 1.39, 0.695, 0.149, "", "", "", "", "", "", "", "", 
  "", "", "", "", "", 41., 0.014, 0.185, 5.4, "tests performed", "", "", "", 
  "", "", "", "", "", "", 84.26, 2.8778*^6, 104.871, 38., 13.188, 8.643, 
  11803.431, 1.1, 304.195, 10.08, 7.1, 51.2, "", 2.89, 78.57, 0.795}, 
 {"ALB", "Europe", "Albania", "2020-03-24", 123., 19., 9.714, 5., 1., 0.571, 
  42.741, 6.602, 3.376, 1.737, 0.347, 0.199, 1.19, "", "", "", "", "", "", 
  "", "", "", "", "", "", 40., 0.014, 0.243, 4.1, "tests performed", "", "", 
  "", "", "", "", "", "", "", 84.26, 2.8778*^6, 104.871, 38., 13.188, 8.643, 
  11803.431, 1.1, 304.195, 10.08, 7.1, 51.2, "", 2.89, 78.57, 0.795}, 
 {"ALB", "Europe", "Albania", "2020-03-25", 146., 23., 12.429, 5., 0., 0.429, 
  50.733, 7.992, 4.319, 1.737, 0., 0.149, 1.17, "", "", "", "", "", "", "", 
  "", 111., 922., 0.32, 0.039, 37., 0.013, 0.336, 3., "tests performed", "", 
  "", "", "", "", "", "", "", "", 84.26, 2.8778*^6, 104.871, 38., 13.188, 
  8.643, 11803.431, 1.1, 304.195, 10.08, 7.1, 51.2, "", 2.89, 78.57, 0.795}, 
 {"ALB", "Europe", "Albania", "2020-03-26", 174., 28., 15.714, 6., 1., 0.571, 
  60.463, 9.73, 5.461, 2.085, 0.347, 0.199, 1.14, "", "", "", "", "", "", "", 
  "", 103., 1025., 0.356, 0.036, 47., 0.016, 0.334, 3., "tests performed", 
  "", "", "", "", "", "", "", "", "", 84.26, 2.8778*^6, 104.871, 38., 13.188, 
  8.643, 11803.431, 1.1, 304.195, 10.08, 7.1, 51.2, "", 2.89, 78.57, 0.795}, 
 {"ALB", "Europe", "Albania", "2020-03-27", 186., 12., 16.571, 8., 2., 0.857, 
  64.633, 4.17, 5.758, 2.78, 0.695, 0.298, 1.08, "", "", "", "", "", "", "", 
  "", 102., 1127., 0.392, 0.035, 56., 0.019, 0.296, 3.4, "tests performed", 
  "", "", "", "", "", "", "", "", "", 84.26, 2.8778*^6, 104.871, 38., 13.188, 
  8.643, 11803.431, 1.1, 304.195, 10.08, 7.1, 51.2, "", 2.89, 78.57, 0.795}, 
 {"ALB", "Europe", "Albania", "2020-03-28", 197., 11., 17.286, 10., 2., 
  1.143, 68.455, 3.822, 6.007, 3.475, 0.695, 0.397, 1.04, "", "", "", "", "", 
  "", "", "", 79., 1206., 0.419, 0.027, 61., 0.021, 0.283, 3.5, 
  "tests performed", "", "", "", "", "", "", "", "", "", 84.26, 2.8778*^6, 
  104.871, 38., 13.188, 8.643, 11803.431, 1.1, 304.195, 10.08, 7.1, 51.2, "", 
  2.89, 78.57, 0.795}, {"ALB", "Europe", "Albania", "2020-03-29", 212., 15., 
  17.571, 10., 0., 1.143, 73.667, 5.212, 6.106, 3.475, 0., 0.397, 1.04, "", 
  "", "", "", "", "", "", "", 111., 1317., 0.458, 0.039, 72., 0.025, 0.244, 
  4.1, "tests performed", "", "", "", "", "", "", "", "", "", 84.26, 
  2.8778*^6, 104.871, 38., 13.188, 8.643, 11803.431, 1.1, 304.195, 10.08, 
  7.1, 51.2, "", 2.89, 78.57, 0.795}, {"ALB", "Europe", "Albania", 
  "2020-03-30", 223., 11., 17., 11., 1., 1., 77.49, 3.822, 5.907, 3.822, 
  0.347, 0.347, 1.05, "", "", "", "", "", "", "", "", 90., 1407., 0.489, 
  0.031, 80., 0.028, 0.212, 4.7, "tests performed", "", "", "", "", "", "", 
  "", "", "", 84.26, 2.8778*^6, 104.871, 38., 13.188, 8.643, 11803.431, 1.1, 
  304.195, 10.08, 7.1, 51.2, "", 2.89, 78.57, 0.795}, 
 {"ALB", "Europe", "Albania", "2020-03-31", 243., 20., 17.143, 15., 4., 
  1.429, 84.44, 6.95, 5.957, 5.212, 1.39, 0.496, 1.08, "", "", "", "", "", 
  "", "", "", 145., 1552., 0.539, 0.05, 95., 0.033, 0.18, 5.5, 
  "tests performed", "", "", "", "", "", "", "", "", "", 84.26, 2.8778*^6, 
  104.871, 38., 13.188, 8.643, 11803.431, 1.1, 304.195, 10.08, 7.1, 51.2, "", 
  2.89, 78.57, 0.795}, {"ALB", "Europe", "Albania", "2020-04-01", 259., 16., 
  16.143, 15., 0., 1.429, 89.999, 5.56, 5.609, 5.212, 0., 0.496, 1.08, "", 
  "", "", "", "", "", "", "", 152., 1704., 0.592, 0.053, 112., 0.039, 0.144, 
  6.9, "tests performed", "", "", "", "", "", "", "", "", "", 84.26, 
  2.8778*^6, 104.871, 38., 13.188, 8.643, 11803.431, 1.1, 304.195, 10.08, 
  7.1, 51.2, "", 2.89, 78.57, 0.795}, {"ALB", "Europe", "Albania", 
  "2020-04-02", 277., 18., 14.714, 16., 1., 1.429, 96.254, 6.255, 5.113, 
  5.56, 0.347, 0.496, 1.11, "", "", "", "", "", "", "", "", 96., 1800., 
  0.625, 0.033, 111., 0.039, 0.133, 7.5, "tests performed", "", "", "", "", 
  "", "", "", "", "", 84.26, 2.8778*^6, 104.871, 38., 13.188, 8.643, 
  11803.431, 1.1, 304.195, 10.08, 7.1, 51.2, "", 2.89, 78.57, 0.795}, 
 {"ALB", "Europe", "Albania", "2020-04-03", 304., 27., 16.857, 17., 1., 
  1.286, 105.636, 9.382, 5.858, 5.907, 0.347, 0.447, 1.15, "", "", "", "", 
  "", "", "", "", 112., 1912., 0.664, 0.039, 112., 0.039, 0.151, 6.6, 
  "tests performed", "", "", "", "", "", "", "", "", "", 84.26, 2.8778*^6, 
  104.871, 38., 13.188, 8.643, 11803.431, 1.1, 304.195, 10.08, 7.1, 51.2, "", 
  2.89, 78.57, 0.795}, {"ALB", "Europe", "Albania", "2020-04-04", 333., 29., 
  19.429, 20., 3., 1.429, 115.713, 10.077, 6.751, 6.95, 1.042, 0.496, 1.14, 
  "", "", "", "", "", "", "", "", 216., 2128., 0.739, 0.075, 132., 0.046, 
  0.147, 6.8, "tests performed", "", "", "", "", "", "", "", "", "", 84.26, 
  2.8778*^6, 104.871, 38., 13.188, 8.643, 11803.431, 1.1, 304.195, 10.08, 
  7.1, 51.2, "", 2.89, 78.57, 0.795}, {"ALB", "Europe", "Albania", 
  "2020-04-05", 361., 28., 21.286, 20., 0., 1.429, 125.443, 9.73, 7.397, 
  6.95, 0., 0.496, 1.08, "", "", "", "", "", "", "", "", 149., 2277., 0.791, 
  0.052, 137., 0.048, 0.155, 6.4, "tests performed", "", "", "", "", "", "", 
  "", "", "", 84.26, 2.8778*^6, 104.871, 38., 13.188, 8.643, 11803.431, 1.1, 
  304.195, 10.08, 7.1, 51.2, "", 2.89, 78.57, 0.795}, 
 {"ALB", "Europe", "Albania", "2020-04-06", 377., 16., 22., 21., 1., 1.429, 
  131.003, 5.56, 7.645, 7.297, 0.347, 0.496, 1., "", "", "", "", "", "", "", 
  "", 175., 2452., 0.852, 0.061, 149., 0.052, 0.148, 6.8, "tests performed", 
  "", "", "", "", "", "", "", "", "", 84.26, 2.8778*^6, 104.871, 38., 13.188, 
  8.643, 11803.431, 1.1, 304.195, 10.08, 7.1, 51.2, "", 2.89, 78.57, 0.795}, 
 {"ALB", "Europe", "Albania", "2020-04-07", 383., 6., 20., 22., 1., 1., 
  133.088, 2.085, 6.95, 7.645, 0.347, 0.347, 0.92, "", "", "", "", "", "", 
  "", "", 182., 2634., 0.915, 0.063, 155., 0.054, 0.129, 7.8, 
  "tests performed", "", "", "", "", "", "", "", "", "", 84.26, 2.8778*^6, 
  104.871, 38., 13.188, 8.643, 11803.431, 1.1, 304.195, 10.08, 7.1, 51.2, "", 
  2.89, 78.57, 0.795}, {"ALB", "Europe", "Albania", "2020-04-08", 400., 17., 
  20.143, 22., 0., 1., 138.995, 5.907, 6.999, 7.645, 0., 0.347, 0.88, "", "", 
  "", "", "", "", "", "", 236., 2870., 0.997, 0.082, 167., 0.058, 0.121, 8.3, 
  "tests performed", "", "", "", "", "", "", "", "", "", 84.26, 2.8778*^6, 
  104.871, 38., 13.188, 8.643, 11803.431, 1.1, 304.195, 10.08, 7.1, 51.2, "", 
  2.89, 78.57, 0.795}, {"ALB", "Europe", "Albania", "2020-04-09", 409., 9., 
  18.857, 23., 1., 1., 142.122, 3.127, 6.553, 7.992, 0.347, 0.347, 0.86, "", 
  "", "", "", "", "", "", "", 234., 3104., 1.079, 0.081, 186., 0.065, 0.101, 
  9.9, "tests performed", "", "", "", "", "", "", "", "", "", 84.26, 
  2.8778*^6, 104.871, 38., 13.188, 8.643, 11803.431, 1.1, 304.195, 10.08, 
  7.1, 51.2, "", 2.89, 78.57, 0.795}, {"ALB", "Europe", "Albania", 
  "2020-04-10", 416., 7., 16., 23., 0., 0.857, 144.555, 2.432, 5.56, 7.992, 
  0., 0.298, 0.88, "", "", "", "", "", "", "", "", 162., 3266., 1.135, 0.056, 
  193., 0.067, 0.083, 12.1, "tests performed", "", "", "", "", "", "", "", 
  "", "", 84.26, 2.8778*^6, 104.871, 38., 13.188, 8.643, 11803.431, 1.1, 
  304.195, 10.08, 7.1, 51.2, "", 2.89, 78.57, 0.795}, 
 {"ALB", "Europe", "Albania", "2020-04-11", 433., 17., 14.286, 23., 0., 
  0.429, 150.462, 5.907, 4.964, 7.992, 0., 0.149, 0.93, "", "", "", "", "", 
  "", "", "", 259., 3525., 1.225, 0.09, 200., 0.069, 0.071, 14., 
  "tests performed", "", "", "", "", "", "", "", "", "", 84.26, 2.8778*^6, 
  104.871, 38., 13.188, 8.643, 11803.431, 1.1, 304.195, 10.08, 7.1, 51.2, "", 
  2.89, 78.57, 0.795}, {"ALB", "Europe", "Albania", "2020-04-12", 446., 13., 
  12.143, 23., 0., 0.429, 154.979, 4.517, 4.219, 7.992, 0., 0.149, 0.97, "", 
  "", "", "", "", "", "", "", 233., 3758., 1.306, 0.081, 212., 0.074, 0.057, 
  17.5, "tests performed", "", "", "", "", "", "", "", "", "", 84.26, 
  2.8778*^6, 104.871, 38., 13.188, 8.643, 11803.431, 1.1, 304.195, 10.08, 
  7.1, 51.2, "", 2.89, 78.57, 0.795}, {"ALB", "Europe", "Albania", 
  "2020-04-13", 467., 21., 12.857, 23., 0., 0.286, 162.277, 7.297, 4.468, 
  7.992, 0., 0.099, 1.01, "", "", "", "", "", "", "", "", 193., 3951., 1.373, 
  0.067, 214., 0.074, 0.06, 16.6, "tests performed", "", "", "", "", "", "", 
  "", "", "", 84.26, 2.8778*^6, 104.871, 38., 13.188, 8.643, 11803.431, 1.1, 
  304.195, 10.08, 7.1, 51.2, "", 2.89, 78.57, 0.795}, 
 {"ALB", "Europe", "Albania", "2020-04-14", 475., 8., 13.143, 24., 1., 0.286, 
  165.057, 2.78, 4.567, 8.34, 0.347, 0.099, 1.01, "", "", "", "", "", "", "", 
  "", 236., 4187., 1.455, 0.082, 222., 0.077, 0.059, 16.9, "tests performed", 
  "", "", "", "", "", "", "", "", "", 84.26, 2.8778*^6, 104.871, 38., 13.188, 
  8.643, 11803.431, 1.1, 304.195, 10.08, 7.1, 51.2, "", 2.89, 78.57, 0.795}, 
 {"ALB", "Europe", "Albania", "2020-04-15", 494., 19., 13.429, 25., 1., 
  0.429, 171.659, 6.602, 4.666, 8.687, 0.347, 0.149, 1.05, "", "", "", "", 
  "", "", "", "", 252., 4439., 1.542, 0.088, 224., 0.078, 0.06, 16.7, 
  "tests performed", "", "", "", "", "", "", "", "", "", 84.26, 2.8778*^6, 
  104.871, 38., 13.188, 8.643, 11803.431, 1.1, 304.195, 10.08, 7.1, 51.2, "", 
  2.89, 78.57, 0.795}, {"ALB", "Europe", "Albania", "2020-04-16", 518., 24., 
  15.571, 26., 1., 0.429, 179.999, 8.34, 5.411, 9.035, 0.347, 0.149, 1.08, 
  "", "", "", "", "", "", "", "", 269., 4708., 1.636, 0.093, 229., 0.08, 
  0.068, 14.7, "tests performed", "", "", "", "", "", "", "", "", "", 84.26, 
  2.8778*^6, 104.871, 38., 13.188, 8.643, 11803.431, 1.1, 304.195, 10.08, 
  7.1, 51.2, "", 2.89, 78.57, 0.795}, {"ALB", "Europe", "Albania", 
  "2020-04-17", 539., 21., 17.571, 26., 0., 0.429, 187.296, 7.297, 6.106, 
  9.035, 0., 0.149, 1.08, "", "", "", "", "", "", "", "", 253., 4961., 1.724, 
  0.088, 242., 0.084, 0.073, 13.8, "tests performed", "", "", "", "", "", "", 
  "", "", "", 84.26, 2.8778*^6, 104.871, 38., 13.188, 8.643, 11803.431, 1.1, 
  304.195, 10.08, 7.1, 51.2, "", 2.89, 78.57, 0.795}, 
 {"ALB", "Europe", "Albania", "2020-04-18", 548., 9., 16.429, 26., 0., 0.429, 
  190.423, 3.127, 5.709, 9.035, 0., 0.149, 1.07, "", "", "", "", "", "", "", 
  "", 231., 5192., 1.804, 0.08, 238., 0.083, 0.069, 14.5, "tests performed", 
  "", "", "", "", "", "", "", "", "", 89.81, 2.8778*^6, 104.871, 38., 13.188, 
  8.643, 11803.431, 1.1, 304.195, 10.08, 7.1, 51.2, "", 2.89, 78.57, 0.795}, 
 {"ALB", "Europe", "Albania", "2020-04-19", 562., 14., 16.571, 26., 0., 
  0.429, 195.288, 4.865, 5.758, 9.035, 0., 0.149, 1.1, "", "", "", "", "", 
  "", "", "", 231., 5423., 1.884, 0.08, 238., 0.083, 0.07, 14.4, 
  "tests performed", "", "", "", "", "", "", "", "", "", 89.81, 2.8778*^6, 
  104.871, 38., 13.188, 8.643, 11803.431, 1.1, 304.195, 10.08, 7.1, 51.2, "", 
  2.89, 78.57, 0.795}, {"ALB", "Europe", "Albania", "2020-04-20", 584., 22., 
  16.714, 26., 0., 0.429, 202.933, 7.645, 5.808, 9.035, 0., 0.149, 1.14, "", 
  "", "", "", "", "", "", "", 233., 5656., 1.965, 0.081, 244., 0.085, 0.068, 
  14.6, "tests performed", "", "", "", "", "", "", "", "", "", 89.81, 
  2.8778*^6, 104.871, 38., 13.188, 8.643, 11803.431, 1.1, 304.195, 10.08, 
  7.1, 51.2, "", 2.89, 78.57, 0.795}, {"ALB", "Europe", "Albania", 
  "2020-04-21", 609., 25., 19.143, 26., 0., 0.286, 211.62, 8.687, 6.652, 
  9.035, 0., 0.099, 1.16, "", "", "", "", "", "", "", "", 242., 5898., 2.049, 
  0.084, 244., 0.085, 0.078, 12.7, "tests performed", "", "", "", "", "", "", 
  "", "", "", 89.81, 2.8778*^6, 104.871, 38., 13.188, 8.643, 11803.431, 1.1, 
  304.195, 10.08, 7.1, 51.2, "", 2.89, 78.57, 0.795}, 
 {"ALB", "Europe", "Albania", "2020-04-22", 634., 25., 20., 27., 1., 0.286, 
  220.307, 8.687, 6.95, 9.382, 0.347, 0.099, 1.14, "", "", "", "", "", "", 
  "", "", 252., 6150., 2.137, 0.088, 244., 0.085, 0.082, 12.2, 
  "tests performed", "", "", "", "", "", "", "", "", "", 89.81, 2.8778*^6, 
  104.871, 38., 13.188, 8.643, 11803.431, 1.1, 304.195, 10.08, 7.1, 51.2, "", 
  2.89, 78.57, 0.795}, {"ALB", "Europe", "Albania", "2020-04-23", 663., 29., 
  20.714, 27., 0., 0.143, 230.384, 10.077, 7.198, 9.382, 0., 0.05, 1.11, "", 
  "", "", "", "", "", "", "", 240., 6390., 2.22, 0.083, 240., 0.083, 0.086, 
  11.6, "tests performed", "", "", "", "", "", "", "", "", "", 89.81, 
  2.8778*^6, 104.871, 38., 13.188, 8.643, 11803.431, 1.1, 304.195, 10.08, 
  7.1, 51.2, "", 2.89, 78.57, 0.795}, {"ALB", "Europe", "Albania", 
  "2020-04-24", 678., 15., 19.857, 27., 0., 0.143, 235.597, 5.212, 6.9, 
  9.382, 0., 0.05, 1.05, "", "", "", "", "", "", "", "", 259., 6649., 2.31, 
  0.09, 241., 0.084, 0.082, 12.1, "tests performed", "", "", "", "", "", "", 
  "", "", "", 89.81, 2.8778*^6, 104.871, 38., 13.188, 8.643, 11803.431, 1.1, 
  304.195, 10.08, 7.1, 51.2, "", 2.89, 78.57, 0.795}, 
 {"ALB", "Europe", "Albania", "2020-04-25", 712., 34., 23.429, 27., 0., 
  0.143, 247.411, 11.815, 8.141, 9.382, 0., 0.05, 1.02, "", "", "", "", "", 
  "", "", "", 247., 6896., 2.396, 0.086, 243., 0.084, 0.096, 10.4, 
  "tests performed", "", "", "", "", "", "", "", "", "", 89.81, 2.8778*^6, 
  104.871, 38., 13.188, 8.643, 11803.431, 1.1, 304.195, 10.08, 7.1, 51.2, "", 
  2.89, 78.57, 0.795}, {"ALB", "Europe", "Albania", "2020-04-26", 726., 14., 
  23.429, 28., 1., 0.286, 252.276, 4.865, 8.141, 9.73, 0.347, 0.099, 0.94, 
  "", "", "", "", "", "", "", "", 264., 7160., 2.488, 0.092, 248., 0.086, 
  0.094, 10.6, "tests performed", "", "", "", "", "", "", "", "", "", 89.81, 
  2.8778*^6, 104.871, 38., 13.188, 8.643, 11803.431, 1.1, 304.195, 10.08, 
  7.1, 51.2, "", 2.89, 78.57, 0.795}, {"ALB", "Europe", "Albania", 
  "2020-04-27", 736., 10., 21.714, 28., 0., 0.286, 255.751, 3.475, 7.545, 
  9.73, 0., 0.099, 0.86, "", "", "", "", "", "", "", "", 212., 7372., 2.562, 
  0.074, 245., 0.085, 0.089, 11.3, "tests performed", "", "", "", "", "", "", 
  "", "", "", 89.81, 2.8778*^6, 104.871, 38., 13.188, 8.643, 11803.431, 1.1, 
  304.195, 10.08, 7.1, 51.2, "", 2.89, 78.57, 0.795}, 
 {"ALB", "Europe", "Albania", "2020-04-28", 750., 14., 20.143, 30., 2., 
  0.571, 260.616, 4.865, 6.999, 10.425, 0.695, 0.199, 0.81, "", "", "", "", 
  "", "", "", "", 267., 7639., 2.654, 0.093, 249., 0.087, 0.081, 12.4, 
  "tests performed", "", "", "", "", "", "", "", "", "", 89.81, 2.8778*^6, 
  104.871, 38., 13.188, 8.643, 11803.431, 1.1, 304.195, 10.08, 7.1, 51.2, "", 
  2.89, 78.57, 0.795}, {"ALB", "Europe", "Albania", "2020-04-29", 766., 16., 
  18.857, 30., 0., 0.429, 266.176, 5.56, 6.553, 10.425, 0., 0.149, 0.75, "", 
  "", "", "", "", "", "", "", 270., 7909., 2.748, 0.094, 251., 0.087, 0.075, 
  13.3, "tests performed", "", "", "", "", "", "", "", "", "", 89.81, 
  2.8778*^6, 104.871, 38., 13.188, 8.643, 11803.431, 1.1, 304.195, 10.08, 
  7.1, 51.2, "", 2.89, 78.57, 0.795}, {"ALB", "Europe", "Albania", 
  "2020-04-30", 773., 7., 15.714, 31., 1., 0.571, 268.608, 2.432, 5.461, 
  10.772, 0.347, 0.199, 0.71, "", "", "", "", "", "", "", "", 225., 8134., 
  2.826, 0.078, 249., 0.087, 0.063, 15.8, "tests performed", "", "", "", "", 
  "", "", "", "", "", 89.81, 2.8778*^6, 104.871, 38., 13.188, 8.643, 
  11803.431, 1.1, 304.195, 10.08, 7.1, 51.2, "", 2.89, 78.57, 0.795}, 
 {"ALB", "Europe", "Albania", "2020-05-01", 782., 9., 14.857, 31., 0., 0.571, 
  271.735, 3.127, 5.163, 10.772, 0., 0.199, 0.7, "", "", "", "", "", "", "", 
  "", 245., 8379., 2.912, 0.085, 247., 0.086, 0.06, 16.6, "tests performed", 
  "", "", "", "", "", "", "", "", "", 89.81, 2.8778*^6, 104.871, 38., 13.188, 
  8.643, 11803.431, 1.1, 304.195, 10.08, 7.1, 51.2, "", 2.89, 78.57, 0.795}, 
 {"ALB", "Europe", "Albania", "2020-05-02", 789., 7., 11., 31., 0., 0.571, 
  274.168, 2.432, 3.822, 10.772, 0., 0.199, 0.7, "", "", "", "", "", "", "", 
  "", 171., 8550., 2.971, 0.059, 236., 0.082, 0.047, 21.5, "tests performed", 
  "", "", "", "", "", "", "", "", "", 89.81, 2.8778*^6, 104.871, 38., 13.188, 
  8.643, 11803.431, 1.1, 304.195, 10.08, 7.1, 51.2, "", 2.89, 78.57, 0.795}, 
 {"ALB", "Europe", "Albania", "2020-05-03", 795., 6., 9.857, 31., 0., 0.429, 
  276.253, 2.085, 3.425, 10.772, 0., 0.149, 0.73, "", "", "", "", "", "", "", 
  "", 197., 8747., 3.039, 0.068, 227., 0.079, 0.043, 23., "tests performed", 
  "", "", "", "", "", "", "", "", "", 89.81, 2.8778*^6, 104.871, 38., 13.188, 
  8.643, 11803.431, 1.1, 304.195, 10.08, 7.1, 51.2, "", 2.89, 78.57, 0.795}, 
 {"ALB", "Europe", "Albania", "2020-05-04", 803., 8., 9.571, 31., 0., 0.429, 
  279.033, 2.78, 3.326, 10.772, 0., 0.149, 0.77, "", "", "", "", "", "", "", 
  "", 140., 8887., 3.088, 0.049, 216., 0.075, 0.044, 22.6, "tests performed", 
  "", "", "", "", "", "", "", "", "", 89.81, 2.8778*^6, 104.871, 38., 13.188, 
  8.643, 11803.431, 1.1, 304.195, 10.08, 7.1, 51.2, "", 2.89, 78.57, 0.795}, 
 {"ALB", "Europe", "Albania", "2020-05-05", 820., 17., 10., 31., 0., 0.143, 
  284.94, 5.907, 3.475, 10.772, 0., 0.05, 0.81, "", "", "", "", "", "", "", 
  "", 270., 9157., 3.182, 0.094, 217., 0.075, 0.046, 21.7, "tests performed", 
  "", "", "", "", "", "", "", "", "", 89.81, 2.8778*^6, 104.871, 38., 13.188, 
  8.643, 11803.431, 1.1, 304.195, 10.08, 7.1, 51.2, "", 2.89, 78.57, 0.795}, 
 {"ALB", "Europe", "Albania", "2020-05-06", 832., 12., 9.429, 31., 0., 0.143, 
  289.11, 4.17, 3.276, 10.772, 0., 0.05, 0.8, "", "", "", "", "", "", "", "", 
  255., 9412., 3.271, 0.089, 215., 0.075, 0.044, 22.8, "tests performed", "", 
  "", "", "", "", "", "", "", "", 89.81, 2.8778*^6, 104.871, 38., 13.188, 
  8.643, 11803.431, 1.1, 304.195, 10.08, 7.1, 51.2, "", 2.89, 78.57, 0.795}, 
 {"ALB", "Europe", "Albania", "2020-05-07", 842., 10., 9.857, 31., 0., 0., 
  292.585, 3.475, 3.425, 10.772, 0., 0., 0.78, "", "", "", "", "", "", "", 
  "", 275., 9687., 3.366, 0.096, 222., 0.077, 0.044, 22.5, "tests performed", 
  "", "", "", "", "", "", "", "", "", 89.81, 2.8778*^6, 104.871, 38., 13.188, 
  8.643, 11803.431, 1.1, 304.195, 10.08, 7.1, 51.2, "", 2.89, 78.57, 0.795}, 
 {"ALB", "Europe", "Albania", "2020-05-08", 850., 8., 9.714, 31., 0., 0., 
  295.365, 2.78, 3.376, 10.772, 0., 0., 0.78, "", "", "", "", "", "", "", "", 
  238., 9925., 3.449, 0.083, 221., 0.077, 0.044, 22.8, "tests performed", "", 
  "", "", "", "", "", "", "", "", 89.81, 2.8778*^6, 104.871, 38., 13.188, 
  8.643, 11803.431, 1.1, 304.195, 10.08, 7.1, 51.2, "", 2.89, 78.57, 0.795}, 
 {"ALB", "Europe", "Albania", "2020-05-09", 856., 6., 9.571, 31., 0., 0., 
  297.449, 2.085, 3.326, 10.772, 0., 0., 0.79, "", "", "", "", "", "", "", 
  "", 224., 10149., 3.527, 0.078, 228., 0.079, 0.042, 23.8, 
  "tests performed", "", "", "", "", "", "", "", "", "", 89.81, 2.8778*^6, 
  104.871, 38., 13.188, 8.643, 11803.431, 1.1, 304.195, 10.08, 7.1, 51.2, "", 
  2.89, 78.57, 0.795}, {"ALB", "Europe", "Albania", "2020-05-10", 868., 12., 
  10.429, 31., 0., 0., 301.619, 4.17, 3.624, 10.772, 0., 0., 0.83, "", "", 
  "", "", "", "", "", "", 170., 10319., 3.586, 0.059, 225., 0.078, 0.046, 
  21.6, "tests performed", "", "", "", "", "", "", "", "", "", 89.81, 
  2.8778*^6, 104.871, 38., 13.188, 8.643, 11803.431, 1.1, 304.195, 10.08, 
  7.1, 51.2, "", 2.89, 78.57, 0.795}, {"ALB", "Europe", "Albania", 
  "2020-05-11", 872., 4., 9.857, 31., 0., 0., 303.009, 1.39, 3.425, 10.772, 
  0., 0., 0.84, "", "", "", "", "", "", "", "", 121., 10440., 3.628, 0.042, 
  222., 0.077, 0.044, 22.5, "tests performed", "", "", "", "", "", "", "", 
  "", "", 89.81, 2.8778*^6, 104.871, 38., 13.188, 8.643, 11803.431, 1.1, 
  304.195, 10.08, 7.1, 51.2, "", 2.89, 78.57, 0.795}, 
 {"ALB", "Europe", "Albania", "2020-05-12", 876., 4., 8., 31., 0., 0., 
  304.399, 1.39, 2.78, 10.772, 0., 0., 0.86, "", "", "", "", "", "", "", "", 
  243., 10683., 3.712, 0.084, 218., 0.076, 0.037, 27.2, "tests performed", 
  "", "", "", "", "", "", "", "", "", 89.81, 2.8778*^6, 104.871, 38., 13.188, 
  8.643, 11803.431, 1.1, 304.195, 10.08, 7.1, 51.2, "", 2.89, 78.57, 0.795}, 
 {"ALB", "Europe", "Albania", "2020-05-13", 880., 4., 6.857, 31., 0., 0., 
  305.789, 1.39, 2.383, 10.772, 0., 0., 0.93, "", "", "", "", "", "", "", "", 
  246., 10929., 3.798, 0.085, 217., 0.075, 0.032, 31.6, "tests performed", 
  "", "", "", "", "", "", "", "", "", 89.81, 2.8778*^6, 104.871, 38., 13.188, 
  8.643, 11803.431, 1.1, 304.195, 10.08, 7.1, 51.2, "", 2.89, 78.57, 0.795}, 
 {"ALB", "Europe", "Albania", "2020-05-14", 898., 18., 8., 31., 0., 0., 
  312.044, 6.255, 2.78, 10.772, 0., 0., 1.06, "", "", "", "", "", "", "", "", 
  191., 11120., 3.864, 0.066, 205., 0.071, 0.039, 25.6, "tests performed", 
  "", "", "", "", "", "", "", "", "", 89.81, 2.8778*^6, 104.871, 38., 13.188, 
  8.643, 11803.431, 1.1, 304.195, 10.08, 7.1, 51.2, "", 2.89, 78.57, 0.795}, 
 {"ALB", "Europe", "Albania", "2020-05-15", 916., 18., 9.429, 31., 0., 0., 
  318.299, 6.255, 3.276, 10.772, 0., 0., 1.1, "", "", "", "", "", "", "", "", 
  219., 11339., 3.94, 0.076, 202., 0.07, 0.047, 21.4, "tests performed", "", 
  "", "", "", "", "", "", "", "", 89.81, 2.8778*^6, 104.871, 38., 13.188, 
  8.643, 11803.431, 1.1, 304.195, 10.08, 7.1, 51.2, "", 2.89, 78.57, 0.795}, 
 {"ALB", "Europe", "Albania", "2020-05-16", 933., 17., 11., 31., 0., 0., 
  324.206, 5.907, 3.822, 10.772, 0., 0., 1.09, "", "", "", "", "", "", "", 
  "", 306., 11645., 4.046, 0.106, 214., 0.074, 0.051, 19.5, 
  "tests performed", "", "", "", "", "", "", "", "", "", 89.81, 2.8778*^6, 
  104.871, 38., 13.188, 8.643, 11803.431, 1.1, 304.195, 10.08, 7.1, 51.2, "", 
  2.89, 78.57, 0.795}, {"ALB", "Europe", "Albania", "2020-05-17", 946., 13., 
  11.143, 31., 0., 0., 328.723, 4.517, 3.872, 10.772, 0., 0., 1.03, "", "", 
  "", "", "", "", "", "", 260., 11905., 4.137, 0.09, 227., 0.079, 0.049, 
  20.4, "tests performed", "", "", "", "", "", "", "", "", "", 89.81, 
  2.8778*^6, 104.871, 38., 13.188, 8.643, 11803.431, 1.1, 304.195, 10.08, 
  7.1, 51.2, "", 2.89, 78.57, 0.795}, {"ALB", "Europe", "Albania", 
  "2020-05-18", 948., 2., 10.857, 31., 0., 0., 329.418, 0.695, 3.773, 10.772, 
  0., 0., 0.97, "", "", "", "", "", "", "", "", 168., 12073., 4.195, 0.058, 
  233., 0.081, 0.047, 21.5, "tests performed", "", "", "", "", "", "", "", 
  "", "", 83.33, 2.8778*^6, 104.871, 38., 13.188, 8.643, 11803.431, 1.1, 
  304.195, 10.08, 7.1, 51.2, "", 2.89, 78.57, 0.795}, 
 {"ALB", "Europe", "Albania", "2020-05-19", 949., 1., 10.429, 31., 0., 0., 
  329.766, 0.347, 3.624, 10.772, 0., 0., 0.94, "", "", "", "", "", "", "", 
  "", 177., 12250., 4.257, 0.062, 224., 0.078, 0.047, 21.5, 
  "tests performed", "", "", "", "", "", "", "", "", "", 83.33, 2.8778*^6, 
  104.871, 38., 13.188, 8.643, 11803.431, 1.1, 304.195, 10.08, 7.1, 51.2, "", 
  2.89, 78.57, 0.795}, {"ALB", "Europe", "Albania", "2020-05-20", 964., 15., 
  12., 31., 0., 0., 334.978, 5.212, 4.17, 10.772, 0., 0., 0.99, "", "", "", 
  "", "", "", "", "", 186., 12436., 4.321, 0.065, 215., 0.075, 0.056, 17.9, 
  "tests performed", "", "", "", "", "", "", "", "", "", 83.33, 2.8778*^6, 
  104.871, 38., 13.188, 8.643, 11803.431, 1.1, 304.195, 10.08, 7.1, 51.2, "", 
  2.89, 78.57, 0.795}, {"ALB", "Europe", "Albania", "2020-05-21", 969., 5., 
  10.143, 31., 0., 0., 336.716, 1.737, 3.525, 10.772, 0., 0., 1.01, "", "", 
  "", "", "", "", "", "", 204., 12640., 4.392, 0.071, 217., 0.075, 0.047, 
  21.4, "tests performed", "", "", "", "", "", "", "", "", "", 83.33, 
  2.8778*^6, 104.871, 38., 13.188, 8.643, 11803.431, 1.1, 304.195, 10.08, 
  7.1, 51.2, "", 2.89, 78.57, 0.795}, {"ALB", "Europe", "Albania", 
  "2020-05-22", 981., 12., 9.286, 31., 0., 0., 340.885, 4.17, 3.227, 10.772, 
  0., 0., 1.07, "", "", "", "", "", "", "", "", 174., 12814., 4.453, 0.06, 
  211., 0.073, 0.044, 22.7, "tests performed", "", "", "", "", "", "", "", 
  "", "", 83.33, 2.8778*^6, 104.871, 38., 13.188, 8.643, 11803.431, 1.1, 
  304.195, 10.08, 7.1, 51.2, "", 2.89, 78.57, 0.795}, 
 {"ALB", "Europe", "Albania", "2020-05-23", 989., 8., 8., 31., 0., 0., 
  343.665, 2.78, 2.78, 10.772, 0., 0., 1.13, "", "", "", "", "", "", "", "", 
  200., 13014., 4.522, 0.069, 196., 0.068, 0.041, 24.5, "tests performed", 
  "", "", "", "", "", "", "", "", "", 83.33, 2.8778*^6, 104.871, 38., 13.188, 
  8.643, 11803.431, 1.1, 304.195, 10.08, 7.1, 51.2, "", 2.89, 78.57, 0.795}, 
 {"ALB", "Europe", "Albania", "2020-05-24", 998., 9., 7.429, 32., 1., 0.143, 
  346.793, 3.127, 2.581, 11.12, 0.347, 0.05, 1.21, "", "", "", "", "", "", 
  "", "", 146., 13160., 4.573, 0.051, 179., 0.062, 0.042, 24.1, 
  "tests performed", "", "", "", "", "", "", "", "", "", 83.33, 2.8778*^6, 
  104.871, 38., 13.188, 8.643, 11803.431, 1.1, 304.195, 10.08, 7.1, 51.2, "", 
  2.89, 78.57, 0.795}, {"ALB", "Europe", "Albania", "2020-05-25", 1004., 6., 
  8., 32., 0., 0.143, 348.878, 2.085, 2.78, 11.12, 0., 0.05, 1.31, "", "", 
  "", "", "", "", "", "", 54., 13214., 4.592, 0.019, 163., 0.057, 0.049, 
  20.4, "tests performed", "", "", "", "", "", "", "", "", "", 83.33, 
  2.8778*^6, 104.871, 38., 13.188, 8.643, 11803.431, 1.1, 304.195, 10.08, 
  7.1, 51.2, "", 2.89, 78.57, 0.795}, {"ALB", "Europe", "Albania", 
  "2020-05-26", 1029., 25., 11.429, 33., 1., 0.286, 357.565, 8.687, 3.971, 
  11.467, 0.347, 0.099, 1.43, "", "", "", "", "", "", "", "", 173., 13387., 
  4.652, 0.06, 162., 0.056, 0.071, 14.2, "tests performed", "", "", "", "", 
  "", "", "", "", "", 86.11, 2.8778*^6, 104.871, 38., 13.188, 8.643, 
  11803.431, 1.1, 304.195, 10.08, 7.1, 51.2, "", 2.89, 78.57, 0.795}, 
 {"ALB", "Europe", "Albania", "2020-05-27", 1050., 21., 12.286, 33., 0., 
  0.286, 364.862, 7.297, 4.269, 11.467, 0., 0.099, 1.45, "", "", "", "", "", 
  "", "", "", 262., 13649., 4.743, 0.091, 173., 0.06, 0.071, 14.1, 
  "tests performed", "", "", "", "", "", "", "", "", "", 86.11, 2.8778*^6, 
  104.871, 38., 13.188, 8.643, 11803.431, 1.1, 304.195, 10.08, 7.1, 51.2, "", 
  2.89, 78.57, 0.795}, {"ALB", "Europe", "Albania", "2020-05-28", 1076., 26., 
  15.286, 33., 0., 0.286, 373.897, 9.035, 5.312, 11.467, 0., 0.099, 1.45, "", 
  "", "", "", "", "", "", "", 225., 13874., 4.821, 0.078, 176., 0.061, 0.087, 
  11.5, "tests performed", "", "", "", "", "", "", "", "", "", 86.11, 
  2.8778*^6, 104.871, 38., 13.188, 8.643, 11803.431, 1.1, 304.195, 10.08, 
  7.1, 51.2, "", 2.89, 78.57, 0.795}, {"ALB", "Europe", "Albania", 
  "2020-05-29", 1099., 23., 16.857, 33., 0., 0.286, 381.889, 7.992, 5.858, 
  11.467, 0., 0.099, 1.4, "", "", "", "", "", "", "", "", 276., 14150., 
  4.917, 0.096, 191., 0.066, 0.088, 11.3, "tests performed", "", "", "", "", 
  "", "", "", "", "", 86.11, 2.8778*^6, 104.871, 38., 13.188, 8.643, 
  11803.431, 1.1, 304.195, 10.08, 7.1, 51.2, "", 2.89, 78.57, 0.795}, 
 {"ALB", "Europe", "Albania", "2020-05-30", 1122., 23., 19., 33., 0., 0.286, 
  389.881, 7.992, 6.602, 11.467, 0., 0.099, 1.33, "", "", "", "", "", "", "", 
  "", 229., 14379., 4.997, 0.08, 195., 0.068, 0.097, 10.3, "tests performed", 
  "", "", "", "", "", "", "", "", "", 86.11, 2.8778*^6, 104.871, 38., 13.188, 
  8.643, 11803.431, 1.1, 304.195, 10.08, 7.1, 51.2, "", 2.89, 78.57, 0.795}, 
 {"ALB", "Europe", "Albania", "2020-05-31", 1137., 15., 19.857, 33., 0., 
  0.143, 395.093, 5.212, 6.9, 11.467, 0., 0.05, 1.26, "", "", "", "", "", "", 
  "", "", 225., 14604., 5.075, 0.078, 206., 0.072, 0.096, 10.4, 
  "tests performed", "", "", "", "", "", "", "", "", "", 86.11, 2.8778*^6, 
  104.871, 38., 13.188, 8.643, 11803.431, 1.1, 304.195, 10.08, 7.1, 51.2, "", 
  2.89, 78.57, 0.795}, {"ALB", "Europe", "Albania", "2020-06-01", 1143., 6., 
  19.857, 33., 0., 0.143, 397.178, 2.085, 6.9, 11.467, 0., 0.05, 1.21, "", 
  "", "", "", "", "", "", "", 102., 14706., 5.11, 0.035, 213., 0.074, 0.093, 
  10.7, "tests performed", "", "", "", "", "", "", "", "", "", 71.3, 
  2.8778*^6, 104.871, 38., 13.188, 8.643, 11803.431, 1.1, 304.195, 10.08, 
  7.1, 51.2, "", 2.89, 78.57, 0.795}, {"ALB", "Europe", "Albania", 
  "2020-06-02", 1164., 21., 19.286, 33., 0., 0., 404.476, 7.297, 6.702, 
  11.467, 0., 0., 1.19, "", "", "", "", "", "", "", "", 243., 14949., 5.195, 
  0.084, 223., 0.077, 0.086, 11.6, "tests performed", "", "", "", "", "", "", 
  "", "", "", 71.3, 2.8778*^6, 104.871, 38., 13.188, 8.643, 11803.431, 1.1, 
  304.195, 10.08, 7.1, 51.2, "", 2.89, 78.57, 0.795}, 
 {"ALB", "Europe", "Albania", "2020-06-03", 1184., 20., 19.143, 33., 0., 0., 
  411.425, 6.95, 6.652, 11.467, 0., 0., 1.18, "", "", "", "", "", "", "", "", 
  297., 15246., 5.298, 0.103, 228., 0.079, 0.084, 11.9, "tests performed", 
  "", "", "", "", "", "", "", "", "", 71.3, 2.8778*^6, 104.871, 38., 13.188, 
  8.643, 11803.431, 1.1, 304.195, 10.08, 7.1, 51.2, "", 2.89, 78.57, 0.795}, 
 {"ALB", "Europe", "Albania", "2020-06-04", 1197., 13., 17.286, 33., 0., 0., 
  415.943, 4.517, 6.007, 11.467, 0., 0., 1.18, "", "", "", "", "", "", "", 
  "", 282., 15528., 5.396, 0.098, 236., 0.082, 0.073, 13.7, 
  "tests performed", "", "", "", "", "", "", "", "", "", 71.3, 2.8778*^6, 
  104.871, 38., 13.188, 8.643, 11803.431, 1.1, 304.195, 10.08, 7.1, 51.2, "", 
  2.89, 78.57, 0.795}, {"ALB", "Europe", "Albania", "2020-06-05", 1212., 15., 
  16.143, 33., 0., 0., 421.155, 5.212, 5.609, 11.467, 0., 0., 1.22, "", "", 
  "", "", "", "", "", "", 162., 15690., 5.452, 0.056, 220., 0.076, 0.073, 
  13.6, "tests performed", "", "", "", "", "", "", "", "", "", 71.3, 
  2.8778*^6, 104.871, 38., 13.188, 8.643, 11803.431, 1.1, 304.195, 10.08, 
  7.1, 51.2, "", 2.89, 78.57, 0.795}, {"ALB", "Europe", "Albania", 
  "2020-06-06", 1232., 20., 15.714, 34., 1., 0.143, 428.105, 6.95, 5.461, 
  11.815, 0.347, 0.05, 1.28, "", "", "", "", "", "", "", "", 253., 15943., 
  5.54, 0.088, 223., 0.077, 0.07, 14.2, "tests performed", "", "", "", "", 
  "", "", "", "", "", 71.3, 2.8778*^6, 104.871, 38., 13.188, 8.643, 
  11803.431, 1.1, 304.195, 10.08, 7.1, 51.2, "", 2.89, 78.57, 0.795}, 
 {"ALB", "Europe", "Albania", "2020-06-07", 1246., 14., 15.571, 34., 0., 
  0.143, 432.97, 4.865, 5.411, 11.815, 0., 0.05, 1.34, "", "", "", "", "", 
  "", "", "", 193., 16136., 5.607, 0.067, 219., 0.076, 0.071, 14.1, 
  "tests performed", "", "", "", "", "", "", "", "", "", 71.3, 2.8778*^6, 
  104.871, 38., 13.188, 8.643, 11803.431, 1.1, 304.195, 10.08, 7.1, 51.2, "", 
  2.89, 78.57, 0.795}, {"ALB", "Europe", "Albania", "2020-06-08", 1263., 17., 
  17.143, 34., 0., 0.143, 438.877, 5.907, 5.957, 11.815, 0., 0.05, 1.44, "", 
  "", "", "", "", "", "", "", 102., 16238., 5.643, 0.035, 219., 0.076, 0.078, 
  12.8, "tests performed", "", "", "", "", "", "", "", "", "", 71.3, 
  2.8778*^6, 104.871, 38., 13.188, 8.643, 11803.431, 1.1, 304.195, 10.08, 
  7.1, 51.2, "", 2.89, 78.57, 0.795}, {"ALB", "Europe", "Albania", 
  "2020-06-09", 1299., 36., 19.286, 34., 0., 0.143, 451.386, 12.51, 6.702, 
  11.815, 0., 0.05, 1.54, "", "", "", "", "", "", "", "", 359., 16597., 
  5.767, 0.125, 235., 0.082, 0.082, 12.2, "tests performed", "", "", "", "", 
  "", "", "", "", "", 71.3, 2.8778*^6, 104.871, 38., 13.188, 8.643, 
  11803.431, 1.1, 304.195, 10.08, 7.1, 51.2, "", 2.89, 78.57, 0.795}, 
 {"ALB", "Europe", "Albania", "2020-06-10", 1341., 42., 22.429, 34., 0., 
  0.143, 465.981, 14.594, 7.794, 11.815, 0., 0.05, 1.6, "", "", "", "", "", 
  "", "", "", 311., 16908., 5.875, 0.108, 237., 0.082, 0.095, 10.6, 
  "tests performed", "", "", "", "", "", "", "", "", "", 71.3, 2.8778*^6, 
  104.871, 38., 13.188, 8.643, 11803.431, 1.1, 304.195, 10.08, 7.1, 51.2, "", 
  2.89, 78.57, 0.795}, {"ALB", "Europe", "Albania", "2020-06-11", 1385., 44., 
  26.857, 35., 1., 0.286, 481.27, 15.289, 9.333, 12.162, 0.347, 0.099, 1.62, 
  "", "", "", "", "", "", "", "", 291., 17199., 5.976, 0.101, 239., 0.083, 
  0.112, 8.9, "tests performed", "", "", "", "", "", "", "", "", "", 71.3, 
  2.8778*^6, 104.871, 38., 13.188, 8.643, 11803.431, 1.1, 304.195, 10.08, 
  7.1, 51.2, "", 2.89, 78.57, 0.795}, {"ALB", "Europe", "Albania", 
  "2020-06-12", 1416., 31., 29.143, 36., 1., 0.429, 492.043, 10.772, 10.127, 
  12.51, 0.347, 0.149, 1.62, "", "", "", "", "", "", "", "", 300., 17499., 
  6.081, 0.104, 258., 0.09, 0.113, 8.9, "tests performed", "", "", "", "", 
  "", "", "", "", "", 71.3, 2.8778*^6, 104.871, 38., 13.188, 8.643, 
  11803.431, 1.1, 304.195, 10.08, 7.1, 51.2, "", 2.89, 78.57, 0.795}, 
 {"ALB", "Europe", "Albania", "2020-06-13", 1464., 48., 33.143, 36., 0., 
  0.286, 508.722, 16.679, 11.517, 12.51, 0., 0.099, 1.65, "", "", "", "", "", 
  "", "", "", 270., 17769., 6.175, 0.094, 261., 0.091, 0.127, 7.9, 
  "tests performed", "", "", "", "", "", "", "", "", "", 71.3, 2.8778*^6, 
  104.871, 38., 13.188, 8.643, 11803.431, 1.1, 304.195, 10.08, 7.1, 51.2, "", 
  2.89, 78.57, 0.795}, {"ALB", "Europe", "Albania", "2020-06-14", 1521., 57., 
  39.286, 36., 0., 0.286, 528.529, 19.807, 13.651, 12.51, 0., 0.099, 1.66, 
  "", "", "", "", "", "", "", "", 362., 18131., 6.3, 0.126, 285., 0.099, 
  0.138, 7.3, "tests performed", "", "", "", "", "", "", "", "", "", 71.3, 
  2.8778*^6, 104.871, 38., 13.188, 8.643, 11803.431, 1.1, 304.195, 10.08, 
  7.1, 51.2, "", 2.89, 78.57, 0.795}, {"ALB", "Europe", "Albania", 
  "2020-06-15", 1590., 69., 46.714, 36., 0., 0.286, 552.505, 23.977, 16.233, 
  12.51, 0., 0.099, 1.65, "", "", "", "", "", "", "", "", 319., 18450., 
  6.411, 0.111, 316., 0.11, 0.148, 6.8, "tests performed", "", "", "", "", 
  "", "", "", "", "", 71.3, 2.8778*^6, 104.871, 38., 13.188, 8.643, 
  11803.431, 1.1, 304.195, 10.08, 7.1, 51.2, "", 2.89, 78.57, 0.795}, 
 {"ALB", "Europe", "Albania", "2020-06-16", 1672., 82., 53.286, 37., 1., 
  0.429, 580.999, 28.494, 18.516, 12.857, 0.347, 0.149, 1.57, "", "", "", "", 
  "", "", "", "", 364., 18814., 6.538, 0.126, 317., 0.11, 0.168, 5.9, 
  "tests performed", "", "", "", "", "", "", "", "", "", 71.3, 2.8778*^6, 
  104.871, 38., 13.188, 8.643, 11803.431, 1.1, 304.195, 10.08, 7.1, 51.2, "", 
  2.89, 78.57, 0.795}, {"ALB", "Europe", "Albania", "2020-06-17", 1722., 50., 
  54.429, 38., 1., 0.571, 598.374, 17.374, 18.913, 13.205, 0.347, 0.199, 
  1.47, "", "", "", "", "", "", "", "", 333., 19147., 6.653, 0.116, 320., 
  0.111, 0.17, 5.9, "tests performed", "", "", "", "", "", "", "", "", "", 
  71.3, 2.8778*^6, 104.871, 38., 13.188, 8.643, 11803.431, 1.1, 304.195, 
  10.08, 7.1, 51.2, "", 2.89, 78.57, 0.795}, {"ALB", "Europe", "Albania", 
  "2020-06-18", 1788., 66., 57.571, 39., 1., 0.571, 621.308, 22.934, 20.005, 
  13.552, 0.347, 0.199, 1.4, "", "", "", "", "", "", "", "", 280., 19427., 
  6.751, 0.097, 318., 0.111, 0.181, 5.5, "tests performed", "", "", "", "", 
  "", "", "", "", "", 71.3, 2.8778*^6, 104.871, 38., 13.188, 8.643, 
  11803.431, 1.1, 304.195, 10.08, 7.1, 51.2, "", 2.89, 78.57, 0.795}, 
 {"ALB", "Europe", "Albania", "2020-06-19", 1838., 50., 60.286, 42., 3., 
  0.857, 638.682, 17.374, 20.949, 14.594, 1.042, 0.298, 1.33, "", "", "", "", 
  "", "", "", "", 330., 19757., 6.865, 0.115, 323., 0.112, 0.187, 5.4, 
  "tests performed", "", "", "", "", "", "", "", "", "", 71.3, 2.8778*^6, 
  104.871, 38., 13.188, 8.643, 11803.431, 1.1, 304.195, 10.08, 7.1, 51.2, "", 
  2.89, 78.57, 0.795}, {"ALB", "Europe", "Albania", "2020-06-20", 1891., 53., 
  61., 43., 1., 1., 657.099, 18.417, 21.197, 14.942, 0.347, 0.347, 1.29, "", 
  "", "", "", "", "", "", "", 320., 20077., 6.977, 0.111, 330., 0.115, 0.185, 
  5.4, "tests performed", "", "", "", "", "", "", "", "", "", 71.3, 
  2.8778*^6, 104.871, 38., 13.188, 8.643, 11803.431, 1.1, 304.195, 10.08, 
  7.1, 51.2, "", 2.89, 78.57, 0.795}, {"ALB", "Europe", "Albania", 
  "2020-06-21", 1962., 71., 63., 44., 1., 1.143, 681.771, 24.672, 21.892, 
  15.289, 0.347, 0.397, 1.26, "", "", "", "", "", "", "", "", 327., 20404., 
  7.09, 0.114, 325., 0.113, 0.194, 5.2, "tests performed", "", "", "", "", 
  "", "", "", "", "", 71.3, 2.8778*^6, 104.871, 38., 13.188, 8.643, 
  11803.431, 1.1, 304.195, 10.08, 7.1, 51.2, "", 2.89, 78.57, 0.795}, 
 {"ALB", "Europe", "Albania", "2020-06-22", 1995., 33., 57.857, 44., 0., 
  1.143, 693.238, 11.467, 20.105, 15.289, 0., 0.397, 1.22, "", "", "", "", 
  "", "", "", "", 239., 20643., 7.173, 0.083, 313., 0.109, 0.185, 5.4, 
  "tests performed", "", "", "", "", "", "", "", "", "", 68.52, 2.8778*^6, 
  104.871, 38., 13.188, 8.643, 11803.431, 1.1, 304.195, 10.08, 7.1, 51.2, "", 
  2.89, 78.57, 0.795}, {"ALB", "Europe", "Albania", "2020-06-23", 2047., 52., 
  53.571, 45., 1., 1.143, 711.307, 18.069, 18.615, 15.637, 0.347, 0.397, 
  1.21, "", "", "", "", "", "", "", "", 328., 20971., 7.287, 0.114, 308., 
  0.107, 0.174, 5.7, "tests performed", "", "", "", "", "", "", "", "", "", 
  68.52, 2.8778*^6, 104.871, 38., 13.188, 8.643, 11803.431, 1.1, 304.195, 
  10.08, 7.1, 51.2, "", 2.89, 78.57, 0.795}, {"ALB", "Europe", "Albania", 
  "2020-06-24", 2114., 67., 56., 47., 2., 1.286, 734.589, 23.282, 19.459, 
  16.332, 0.695, 0.447, 1.22, "", "", "", "", "", "", "", "", 347., 21318., 
  7.408, 0.121, 310., 0.108, 0.181, 5.5, "tests performed", "", "", "", "", 
  "", "", "", "", "", 68.52, 2.8778*^6, 104.871, 38., 13.188, 8.643, 
  11803.431, 1.1, 304.195, 10.08, 7.1, 51.2, "", 2.89, 78.57, 0.795}, 
 {"ALB", "Europe", "Albania", "2020-06-25", 2192., 78., 57.714, 49., 2., 
  1.429, 761.693, 27.104, 20.055, 17.027, 0.695, 0.496, 1.23, "", "", "", "", 
  "", "", "", "", 344., 21662., 7.527, 0.12, 319., 0.111, 0.181, 5.5, 
  "tests performed", "", "", "", "", "", "", "", "", "", 68.52, 2.8778*^6, 
  104.871, 38., 13.188, 8.643, 11803.431, 1.1, 304.195, 10.08, 7.1, 51.2, "", 
  2.89, 78.57, 0.795}, {"ALB", "Europe", "Albania", "2020-06-26", 2269., 77., 
  61.571, 51., 2., 1.286, 788.45, 26.757, 21.395, 17.722, 0.695, 0.447, 1.22, 
  "", "", "", "", "", "", "", "", 402., 22064., 7.667, 0.14, 330., 0.115, 
  0.187, 5.4, "tests performed", "", "", "", "", "", "", "", "", "", 68.52, 
  2.8778*^6, 104.871, 38., 13.188, 8.643, 11803.431, 1.1, 304.195, 10.08, 
  7.1, 51.2, "", 2.89, 78.57, 0.795}, {"ALB", "Europe", "Albania", 
  "2020-06-27", 2330., 61., 62.714, 53., 2., 1.429, 809.646, 21.197, 21.792, 
  18.417, 0.695, 0.496, 1.19, "", "", "", "", "", "", "", "", 355., 22419., 
  7.79, 0.123, 335., 0.116, 0.187, 5.3, "tests performed", "", "", "", "", 
  "", "", "", "", "", 68.52, 2.8778*^6, 104.871, 38., 13.188, 8.643, 
  11803.431, 1.1, 304.195, 10.08, 7.1, 51.2, "", 2.89, 78.57, 0.795}, 
 {"ALB", "Europe", "Albania", "2020-06-28", 2402., 72., 62.857, 55., 2., 
  1.571, 834.665, 25.019, 21.842, 19.112, 0.695, 0.546, 1.18, "", "", "", "", 
  "", "", "", "", 374., 22793., 7.92, 0.13, 341., 0.118, 0.184, 5.4, 
  "tests performed", "", "", "", "", "", "", "", "", "", 68.52, 2.8778*^6, 
  104.871, 38., 13.188, 8.643, 11803.431, 1.1, 304.195, 10.08, 7.1, 51.2, "", 
  2.89, 78.57, 0.795}, {"ALB", "Europe", "Albania", "2020-06-29", 2466., 64., 
  67.286, 58., 3., 2., 856.905, 22.239, 23.381, 20.154, 1.042, 0.695, 1.16, 
  "", "", "", "", "", "", "", "", 371., 23164., 8.049, 0.129, 360., 0.125, 
  0.187, 5.4, "tests performed", "", "", "", "", "", "", "", "", "", 68.52, 
  2.8778*^6, 104.871, 38., 13.188, 8.643, 11803.431, 1.1, 304.195, 10.08, 
  7.1, 51.2, "", 2.89, 78.57, 0.795}, {"ALB", "Europe", "Albania", 
  "2020-06-30", 2535., 69., 69.714, 62., 4., 2.429, 880.881, 23.977, 24.225, 
  21.544, 1.39, 0.844, 1.13, "", "", "", "", "", "", "", "", 371., 23535., 
  8.178, 0.129, 366., 0.127, 0.19, 5.3, "tests performed", "", "", "", "", 
  "", "", "", "", "", 68.52, 2.8778*^6, 104.871, 38., 13.188, 8.643, 
  11803.431, 1.1, 304.195, 10.08, 7.1, 51.2, "", 2.89, 78.57, 0.795}, 
 {"ALB", "Europe", "Albania", "2020-07-01", 2580., 45., 66.571, 65., 3., 
  2.571, 896.518, 15.637, 23.133, 22.587, 1.042, 0.894, 1.12, "", "", "", "", 
  "", "", "", "", 269., 23804., 8.272, 0.093, 355., 0.123, 0.188, 5.3, 
  "tests performed", "", "", "", "", "", "", "", "", "", 68.52, 2.8778*^6, 
  104.871, 38., 13.188, 8.643, 11803.431, 1.1, 304.195, 10.08, 7.1, 51.2, "", 
  2.89, 78.57, 0.795}, {"ALB", "Europe", "Albania", "2020-07-02", 2662., 82., 
  67.143, 69., 4., 2.857, 925.012, 28.494, 23.331, 23.977, 1.39, 0.993, 1.14, 
  "", "", "", "", "", "", "", "", 368., 24172., 8.399, 0.128, 359., 0.125, 
  0.187, 5.3, "tests performed", "", "", "", "", "", "", "", "", "", 68.52, 
  2.8778*^6, 104.871, 38., 13.188, 8.643, 11803.431, 1.1, 304.195, 10.08, 
  7.1, 51.2, "", 2.89, 78.57, 0.795}, {"ALB", "Europe", "Albania", 
  "2020-07-03", 2752., 90., 69., 72., 3., 3., 956.286, 31.274, 23.977, 
  25.019, 1.042, 1.042, 1.15, "", "", "", "", "", "", "", "", 362., 24534., 
  8.525, 0.126, 353., 0.123, 0.195, 5.1, "tests performed", "", "", "", "", 
  "", "", "", "", "", 68.52, 2.8778*^6, 104.871, 38., 13.188, 8.643, 
  11803.431, 1.1, 304.195, 10.08, 7.1, 51.2, "", 2.89, 78.57, 0.795}, 
 {"ALB", "Europe", "Albania", "2020-07-04", 2819., 67., 69.857, 74., 2., 3., 
  979.568, 23.282, 24.274, 25.714, 0.695, 1.042, 1.14, "", "", "", "", "", 
  "", "", "", 376., 24910., 8.656, 0.131, 356., 0.124, 0.196, 5.1, 
  "tests performed", "", "", "", "", "", "", "", "", "", 68.52, 2.8778*^6, 
  104.871, 38., 13.188, 8.643, 11803.431, 1.1, 304.195, 10.08, 7.1, 51.2, "", 
  2.89, 78.57, 0.795}, {"ALB", "Europe", "Albania", "2020-07-05", 2893., 74., 
  70.143, 76., 2., 3., 1005.282, 25.714, 24.374, 26.409, 0.695, 1.042, 1.13, 
  "", "", "", "", "", "", "", "", 392., 25302., 8.792, 0.136, 358., 0.124, 
  0.196, 5.1, "tests performed", "", "", "", "", "", "", "", "", "", 68.52, 
  2.8778*^6, 104.871, 38., 13.188, 8.643, 11803.431, 1.1, 304.195, 10.08, 
  7.1, 51.2, "", 2.89, 78.57, 0.795}, {"ALB", "Europe", "Albania", 
  "2020-07-06", 2964., 71., 71.143, 79., 3., 3., 1029.953, 24.672, 24.721, 
  27.452, 1.042, 1.042, 1.13, "", "", "", "", "", "", "", "", 459., 25761., 
  8.952, 0.159, 371., 0.129, 0.192, 5.2, "tests performed", "", "", "", "", 
  "", "", "", "", "", 62.96, 2.8778*^6, 104.871, 38., 13.188, 8.643, 
  11803.431, 1.1, 304.195, 10.08, 7.1, 51.2, "", 2.89, 78.57, 0.795}, 
 {"ALB", "Europe", "Albania", "2020-07-07", 3038., 74., 71.857, 81., 2., 
  2.714, 1055.668, 25.714, 24.969, 28.147, 0.695, 0.943, 1.12, "", "", "", 
  "", "", "", "", "", 409., 26170., 9.094, 0.142, 376., 0.131, 0.191, 5.2, 
  "tests performed", "", "", "", "", "", "", "", "", "", 62.96, 2.8778*^6, 
  104.871, 38., 13.188, 8.643, 11803.431, 1.1, 304.195, 10.08, 7.1, 51.2, "", 
  2.89, 78.57, 0.795}, {"ALB", "Europe", "Albania", "2020-07-08", 3106., 68., 
  75.143, 83., 2., 2.571, 1079.297, 23.629, 26.111, 28.841, 0.695, 0.894, 
  1.13, "", "", "", "", "", "", "", "", 397., 26567., 9.232, 0.138, 395., 
  0.137, 0.19, 5.3, "tests performed", "", "", "", "", "", "", "", "", "", 
  62.96, 2.8778*^6, 104.871, 38., 13.188, 8.643, 11803.431, 1.1, 304.195, 
  10.08, 7.1, 51.2, "", 2.89, 78.57, 0.795}, {"ALB", "Europe", "Albania", 
  "2020-07-09", 3188., 82., 75.143, 83., 0., 2., 1107.791, 28.494, 26.111, 
  28.841, 0., 0.695, 1.14, "", "", "", "", "", "", "", "", 401., 26968., 
  9.371, 0.139, 399., 0.139, 0.188, 5.3, "tests performed", "", "", "", "", 
  "", "", "", "", "", 62.96, 2.8778*^6, 104.871, 38., 13.188, 8.643, 
  11803.431, 1.1, 304.195, 10.08, 7.1, 51.2, "", 2.89, 78.57, 0.795}, 
 {"ALB", "Europe", "Albania", "2020-07-10", 3278., 90., 75.143, 85., 2., 
  1.857, 1139.065, 31.274, 26.111, 29.536, 0.695, 0.645, 1.16, "", "", "", 
  "", "", "", "", "", 420., 27388., 9.517, 0.146, 408., 0.142, 0.184, 5.4, 
  "tests performed", "", "", "", "", "", "", "", "", "", 62.96, 2.8778*^6, 
  104.871, 38., 13.188, 8.643, 11803.431, 1.1, 304.195, 10.08, 7.1, 51.2, "", 
  2.89, 78.57, 0.795}, {"ALB", "Europe", "Albania", "2020-07-11", 3371., 93., 
  78.857, 89., 4., 2.143, 1171.381, 32.316, 27.402, 30.926, 1.39, 0.745, 
  1.17, "", "", "", "", "", "", "", "", 420., 27808., 9.663, 0.146, 414., 
  0.144, 0.19, 5.3, "tests performed", "", "", "", "", "", "", "", "", "", 
  62.96, 2.8778*^6, 104.871, 38., 13.188, 8.643, 11803.431, 1.1, 304.195, 
  10.08, 7.1, 51.2, "", 2.89, 78.57, 0.795}, {"ALB", "Europe", "Albania", 
  "2020-07-12", 3454., 83., 80.143, 93., 4., 2.429, 1200.222, 28.841, 27.849, 
  32.316, 1.39, 0.844, 1.17, "", "", "", "", "", "", "", "", 420., 28228., 
  9.809, 0.146, 418., 0.145, 0.192, 5.2, "tests performed", "", "", "", "", 
  "", "", "", "", "", 62.96, 2.8778*^6, 104.871, 38., 13.188, 8.643, 
  11803.431, 1.1, 304.195, 10.08, 7.1, 51.2, "", 2.89, 78.57, 0.795}, 
 {"ALB", "Europe", "Albania", "2020-07-13", 3571., 117., 86.714, 95., 2., 
  2.286, 1240.878, 40.656, 30.132, 33.011, 0.695, 0.794, 1.17, "", "", "", 
  "", "", "", "", "", 585., 28813., 10.012, 0.203, 436., 0.152, 0.199, 5., 
  "tests performed", "", "", "", "", "", "", "", "", "", 62.96, 2.8778*^6, 
  104.871, 38., 13.188, 8.643, 11803.431, 1.1, 304.195, 10.08, 7.1, 51.2, "", 
  2.89, 78.57, 0.795}, {"ALB", "Europe", "Albania", "2020-07-14", 3667., 96., 
  89.857, 97., 2., 2.286, 1274.237, 33.359, 31.224, 33.706, 0.695, 0.794, 
  1.13, "", "", "", "", "", "", "", "", 451., 29264., 10.169, 0.157, 442., 
  0.154, 0.203, 4.9, "tests performed", "", "", "", "", "", "", "", "", "", 
  62.96, 2.8778*^6, 104.871, 38., 13.188, 8.643, 11803.431, 1.1, 304.195, 
  10.08, 7.1, 51.2, "", 2.89, 78.57, 0.795}, {"ALB", "Europe", "Albania", 
  "2020-07-15", 3752., 85., 92.286, 101., 4., 2.571, 1303.774, 29.536, 
  32.068, 35.096, 1.39, 0.894, 1.11, "", "", "", "", "", "", "", "", 361., 
  29625., 10.294, 0.125, 437., 0.152, 0.211, 4.7, "tests performed", "", "", 
  "", "", "", "", "", "", "", 62.96, 2.8778*^6, 104.871, 38., 13.188, 8.643, 
  11803.431, 1.1, 304.195, 10.08, 7.1, 51.2, "", 2.89, 78.57, 0.795}, 
 {"ALB", "Europe", "Albania", "2020-07-16", 3851., 99., 94.714, 104., 3., 3., 
  1338.175, 34.401, 32.912, 36.139, 1.042, 1.042, 1.09, "", "", "", "", "", 
  "", "", "", 425., 30050., 10.442, 0.148, 440., 0.153, 0.215, 4.6, 
  "tests performed", "", "", "", "", "", "", "", "", "", 62.96, 2.8778*^6, 
  104.871, 38., 13.188, 8.643, 11803.431, 1.1, 304.195, 10.08, 7.1, 51.2, "", 
  2.89, 78.57, 0.795}, {"ALB", "Europe", "Albania", "2020-07-17", 3906., 55., 
  89.714, 107., 3., 3.143, 1357.287, 19.112, 31.175, 37.181, 1.042, 1.092, 
  1.07, "", "", "", "", "", "", "", "", 431., 30481., 10.592, 0.15, 442., 
  0.154, 0.203, 4.9, "tests performed", "", "", "", "", "", "", "", "", "", 
  62.96, 2.8778*^6, 104.871, 38., 13.188, 8.643, 11803.431, 1.1, 304.195, 
  10.08, 7.1, 51.2, "", 2.89, 78.57, 0.795}, {"ALB", "Europe", "Albania", 
  "2020-07-18", 4008., 102., 91., 111., 4., 3.143, 1392.731, 35.444, 31.621, 
  38.571, 1.39, 1.092, 1.08, "", "", "", "", "", "", "", "", 501., 30982., 
  10.766, 0.174, 453., 0.157, 0.201, 5., "tests performed", "", "", "", "", 
  "", "", "", "", "", 62.96, 2.8778*^6, 104.871, 38., 13.188, 8.643, 
  11803.431, 1.1, 304.195, 10.08, 7.1, 51.2, "", 2.89, 78.57, 0.795}, 
 {"ALB", "Europe", "Albania", "2020-07-19", 4090., 82., 90.857, 112., 1., 
  2.714, 1421.225, 28.494, 31.572, 38.919, 0.347, 0.943, 1.07, "", "", "", 
  "", "", "", "", "", 331., 31313., 10.881, 0.115, 441., 0.153, 0.206, 4.9, 
  "tests performed", "", "", "", "", "", "", "", "", "", 62.96, 2.8778*^6, 
  104.871, 38., 13.188, 8.643, 11803.431, 1.1, 304.195, 10.08, 7.1, 51.2, "", 
  2.89, 78.57, 0.795}, {"ALB", "Europe", "Albania", "2020-07-20", 4171., 81., 
  85.714, 113., 1., 2.571, 1449.371, 28.147, 29.785, 39.266, 0.347, 0.894, 
  1.08, "", "", "", "", "", "", "", "", 267., 31580., 10.974, 0.093, 395., 
  0.137, 0.217, 4.6, "tests performed", "", "", "", "", "", "", "", "", "", 
  62.96, 2.8778*^6, 104.871, 38., 13.188, 8.643, 11803.431, 1.1, 304.195, 
  10.08, 7.1, 51.2, "", 2.89, 78.57, 0.795}, {"ALB", "Europe", "Albania", 
  "2020-07-21", 4290., 119., 89., 117., 4., 2.857, 1490.722, 41.351, 30.926, 
  40.656, 1.39, 0.993, 1.09, "", "", "", "", "", "", "", "", 482., 32062., 
  11.141, 0.167, 400., 0.139, 0.222, 4.5, "tests performed", "", "", "", "", 
  "", "", "", "", "", 62.96, 2.8778*^6, 104.871, 38., 13.188, 8.643, 
  11803.431, 1.1, 304.195, 10.08, 7.1, 51.2, "", 2.89, 78.57, 0.795}, 
 {"ALB", "Europe", "Albania", "2020-07-22", 4358., 68., 86.571, 120., 3., 
  2.714, 1514.351, 23.629, 30.083, 41.699, 1.042, 0.943, 1.08, "", "", "", 
  "", "", "", "", "", 496., 32558., 11.314, 0.172, 419., 0.146, 0.207, 4.8, 
  "tests performed", "", "", "", "", "", "", "", "", "", 62.96, 2.8778*^6, 
  104.871, 38., 13.188, 8.643, 11803.431, 1.1, 304.195, 10.08, 7.1, 51.2, "", 
  2.89, 78.57, 0.795}, {"ALB", "Europe", "Albania", "2020-07-23", 4466., 
  108., 87.857, 123., 3., 2.714, 1551.88, 37.529, 30.529, 42.741, 1.042, 
  0.943, 1.1, "", "", "", "", "", "", "", "", 477., 33035., 11.479, 0.166, 
  426., 0.148, 0.206, 4.8, "tests performed", "", "", "", "", "", "", "", "", 
  "", 62.96, 2.8778*^6, 104.871, 38., 13.188, 8.643, 11803.431, 1.1, 304.195, 
  10.08, 7.1, 51.2, "", 2.89, 78.57, 0.795}, {"ALB", "Europe", "Albania", 
  "2020-07-24", 4570., 104., 94.857, 128., 5., 3., 1588.019, 36.139, 32.962, 
  44.478, 1.737, 1.042, 1.1, "", "", "", "", "", "", "", "", 564., 33599., 
  11.675, 0.196, 445., 0.155, 0.213, 4.7, "tests performed", "", "", "", "", 
  "", "", "", "", "", 62.96, 2.8778*^6, 104.871, 38., 13.188, 8.643, 
  11803.431, 1.1, 304.195, 10.08, 7.1, 51.2, "", 2.89, 78.57, 0.795}, 
 {"ALB", "Europe", "Albania", "2020-07-25", 4637., 67., 89.857, 134., 6., 
  3.286, 1611.3, 23.282, 31.224, 46.563, 2.085, 1.142, 1.1, "", "", "", "", 
  "", "", "", "", 304., 33903., 11.781, 0.106, 417., 0.145, 0.215, 4.6, 
  "tests performed", "", "", "", "", "", "", "", "", "", 62.96, 2.8778*^6, 
  104.871, 38., 13.188, 8.643, 11803.431, 1.1, 304.195, 10.08, 7.1, 51.2, "", 
  2.89, 78.57, 0.795}, {"ALB", "Europe", "Albania", "2020-07-26", 4763., 
  126., 96.143, 138., 4., 3.714, 1655.084, 43.783, 33.408, 47.953, 1.39, 
  1.291, 1.13, "", "", "", "", "", "", "", "", 504., 34407., 11.956, 0.175, 
  442., 0.154, 0.218, 4.6, "tests performed", "", "", "", "", "", "", "", "", 
  "", 62.96, 2.8778*^6, 104.871, 38., 13.188, 8.643, 11803.431, 1.1, 304.195, 
  10.08, 7.1, 51.2, "", 2.89, 78.57, 0.795}, {"ALB", "Europe", "Albania", 
  "2020-07-27", 4880., 117., 101.286, 144., 6., 4.429, 1695.74, 40.656, 
  35.196, 50.038, 2.085, 1.539, 1.13, "", "", "", "", "", "", "", "", 500., 
  34907., 12.13, 0.174, 475., 0.165, 0.213, 4.7, "tests performed", "", "", 
  "", "", "", "", "", "", "", 62.96, 2.8778*^6, 104.871, 38., 13.188, 8.643, 
  11803.431, 1.1, 304.195, 10.08, 7.1, 51.2, "", 2.89, 78.57, 0.795}, 
 {"ALB", "Europe", "Albania", "2020-07-28", 4997., 117., 101., 148., 4., 
  4.429, 1736.396, 40.656, 35.096, 51.428, 1.39, 1.539, 1.11, "", "", "", "", 
  "", "", "", "", 507., 35414., 12.306, 0.176, 479., 0.166, 0.211, 4.7, 
  "tests performed", "", "", "", "", "", "", "", "", "", 62.96, 2.8778*^6, 
  104.871, 38., 13.188, 8.643, 11803.431, 1.1, 304.195, 10.08, 7.1, 51.2, "", 
  2.89, 78.57, 0.795}, {"ALB", "Europe", "Albania", "2020-07-29", 5105., 
  108., 106.714, 150., 2., 4.286, 1773.925, 37.529, 37.082, 52.123, 0.695, 
  1.489, 1.1, "", "", "", "", "", "", "", "", 502., 35916., 12.48, 0.174, 
  480., 0.167, 0.222, 4.5, "tests performed", "", "", "", "", "", "", "", "", 
  "", 62.96, 2.8778*^6, 104.871, 38., 13.188, 8.643, 11803.431, 1.1, 304.195, 
  10.08, 7.1, 51.2, "", 2.89, 78.57, 0.795}, {"ALB", "Europe", "Albania", 
  "2020-07-30", 5197., 92., 104.429, 154., 4., 4.429, 1805.893, 31.969, 
  36.288, 53.513, 1.39, 1.539, 1.08, "", "", "", "", "", "", "", "", 507., 
  36423., 12.657, 0.176, 484., 0.168, 0.216, 4.6, "tests performed", "", "",
[truncated: 36,133,385 more chars]
