# Supplementary material for: Modeling the waves of Covid-19
Source: bioRxiv or medRxiv preprint supplement (doi:10.1101/2021.06.15.21258969), 2021-08-11
Supplement: Supplementary file [file media-1.zip]

USE THIS PROGRAM, CREATED BY IVAN CHEREDNIK,  
AT YOUR OWN RISK. ONE PROJECTIONS IS ON THE  
BASIS OF THE LATEST 20 DAYS. THE AVRG CURVE  
IS THE AVERAGE OF 9 PRIOR FORECAST CURVES.  
EXPECT THE "SATURATION" TO MOVE OVER TIME.  
IF THERE IS NO SATURATION THEN THE FORECAST  
IS FOR THE 4 NEXT MONTHS. THIS PROGRAM IS  
DESIGNED FOR THE LATER STAGES OF THE WAVES.

TO USE IT, YOU MUST AGREE WITH THESE TERMS.  
ALL CREDITS GO TO IVAN CHEREDNIK, THE DATA:  
[githubusercontent.com/owid/covid-19-data](https://github.com/owid/covid-19-data).  
THE PROGRAM WAS CHECKED FOR MATHEMATICA 11.

1) PUT THE FILES IN ANY FOLDER. IF YOU USE  
MathKern, THEN MAKE IT THE START FOLDER IN  
"MathKern Properties". ALTERNATIVELY, AND  
FOR "FULL" MATHEMATICA, BEGIN WITH COMMAND  
SetDirectory["your folder"], NOTICE QUOTES.  
THEN DO "<<forwor.txt"; THE OUTPUT WILL BE  
IN "world-full.pdf" (IF YOU USE MathKern).

2) EXE-TOOL. CHANGE PATH OF "math.exe" TO  
ITS ACTUAL ONE IN YOUR SYSTEM, WHICH IS IN  
"mathpath.txt" (WITH QUOTES THERE). CLICK  
ON "foreurun.exe", AND AFTER 2-3 MINS THE  
FILE "world-now.pdf" WILL OPEN. COVID DATA  
ARE UPDATED DAILY; THERE IS NO HARM TO RUN  
"foreurun.exe" AS MANY TIMES AS YOU WISH.

3) FILE "worldfile.txt" CONTROLS COUNTRIES  
AND REGIONS. MAKE reg="ALL" FOR THE WORLD,  
IT CAN BE reg="Europe","North America",ETC.  
BY MAKING grp=1 YOU WILL RUN IT FOR YOUR  
GROUP grp={"United States","Brazil"}, ETC.  
MAKE delprev=1 FOR THE 1st RUN WITH A NEW  
GROUP/REGION: OLD OUTPUTS WILL BE DELETED.

THE PDF FILES PRODUCED BY "forwor.txt" AND  
ITS OUTPUT IN MATHEMATICA CONTAIN FURTHER  
RELEVANT INFORMATION. THIS SOFTWARE IS NOT  
FOR ANY COMMERCIAL USE; THIS IS A RESEARCH  
TOOL! YOUR COMMENTS ARE APPRECIATED. -IVAN
